# Supplementary material for: Pharmacological inhibition of CLK2 activates YAP by promoting alternative splicing of AMOTL2
Source: eLife. 2023 Dec 21;12:RP88508. doi: 10.7554/eLife.88508 (PMC10735217; doi:10.7554/eLife.88508)
Supplement: Figure 1—source data 1. [file elife-88508-fig1-data1.xlsx]

## Sheet: 200 nM screen
200 nM ReFRAME screen hits
Compound SMILES	Compound Name	Z score
ONC(=O)/C=C/c1ccc(cc1)CNCCc1c(C)[nH]c2c1cccc2	Panobinostat	61.7077
O=C1OCC(=C1)[C@H]1CC[C@]2([C@]1(C)CC[C@H]1[C@H]2CC[C@H]2[C@]1(C)CC[C@@H](C2)O[C@H]1C[C@H](O)[C@@H]([C@H](O1)C)O[C@H]1C[C@H](O)[C@@H]([C@H](O1)C)O[C@H]1C[C@H](O)[C@@H]([C@H](O1)C)O)O	DIGITOXIN	39.002
CCCCc1nc2c(n1CCN(CC)CC)ccc(c2)/C=C/C(=O)NO	Pracinostat (SB939)	35.817
ONC(=O)c1cnc(nc1)N1CCN(CC1)S(=O)(=O)c1ccc2c(c1)cccc2	JNJ-16241199	33.4329
CCCCCCCCCCCCCC(=O)O[C@@H]1[C@@H](C)[C@@]2(O)[C@H]([C@H]3[C@]1(OC(=O)C)C3(C)C)C=C(C[C@]1([C@H]2C=C(C1=O)C)O)CO	Phorbol 12-myristate 13-acetate	31.6397
OCCN(Cc1ccc(cc1)/C=C/C(=O)NO)CCc1c[nH]c2c1cccc2	LAQ824 (NVP-LAQ824, Dacinostat)	31.0186
C/C=C/1\NC(=O)[C@H]2CSSCC/C=C/[C@@H](OC(=O)[C@@H](NC1=O)C(C)C)CC(=O)N[C@@H](C(=O)N2)C(C)C	Romidepsin (FK228 ,depsipeptide)	30.8208
CCS(=O)(=O)Nc1ccc(c(c1)c1cn(C)c(=O)c2c1cc[nH]2)Oc1ccc(cc1F)F	ABBV-075	29.6521
O=CC12CCC(CC2(O)CC[C@@H]2[C@@H]1CCC1(C2(O)CCC1C1=CC(=O)OC1)C)OC1OC(C)C(C(C1O)O)O	CONVALLATOXIN	25.8952
COC1C(O)[C@@H](O[C@H]2CC[C@]3([C@@H](C2)CC[C@@H]2[C@@H]3CC[C@]3([C@]2(O)CC[C@@H]3C2=CC(=O)OC2)C)C=O)OC([C@H]1O)C	Peruvoside	25.5157
CN1CCN(CC1)CCCN=C(C[C@@H]1N=C(c2ccc(cc2)Cl)c2c(n3c1nnc3C)sc(c2C)C)O	TEN-010	23.8943
OC[C@@]12[C@H](O)C[C@@H](C[C@@]2(O)CC[C@@H]2C1C(O)C[C@]1([C@]2(O)CC[C@@H]1C1=CC(=O)OC1)C)O[C@H]1OC(C)[C@H](C(C1O)O)O	G-Strophanthin	19.3178
COc1cc(ccc1O)CC(=O)OCC1=C[C@H]2[C@H]3O[C@]4(O[C@]2([C@H]2[C@@](C1)(O)C(=O)C(=C2)C)[C@@H](C[C@@]3(O4)C(=C)C)C)Cc1ccccc1	Resiniferatoxin	18.8944
CO[C@H]1[C@H](OC(=O)C)[C@H](O[C@H]2CC[C@]3([C@@H](C2)CC[C@@H]2[C@@H]3CC[C@]3([C@]2(O)CC[C@@H]3C2=CC(=O)OC2)C)C)O[C@H]([C@@H]1O)C	CERBERIN	17.9427
OC[C@H]1O[C@@H](O[C@@H]2[C@@H](C)O[C@H](C[C@@H]2OC(=O)C)O[C@H]2[C@@H](O)C[C@@H](O[C@@H]2C)O[C@H]2[C@@H](O)C[C@@H](O[C@@H]2C)O[C@H]2CC[C@]3([C@@H](C2)CC[C@@H]2[C@@H]3C[C@@H](O)[C@]3([C@]2(O)CC[C@@H]3C2=CC(=O)OC2)C)C)[C@@H]([C@H]([C@@H]1O)O)O	LANATOSIDE C	16.8732
OCC1OC(OC2C(C)OC(CC2OC(=O)C)OC2C(O)CC(OC2C)OC2C(O)CC(OC2C)OC2CCC3(C(C2)CC[C@@H]2[C@@H]3CCC3(C2(O)CCC3C2=CC(=O)OC2)C)C)C(C(C1O)O)O	LANATOSIDE A	15.9955
COCc1nnc(n1c1ccc(nc1)OC)N1CC(C1)Oc1ccc(cc1Cl)F	PF-3274167	15.9207
Fc1ccc(cc1)[C@H]1[C@H](OCCN1C=c1[nH]c(=O)n([nH]1)P(=O)(O)O)O[C@@H](c1cc(cc(c1)C(F)(F)F)C(F)(F)F)C	fosaprepitant dimeglumine	14.843
COC1C(OC(=O)C)C(OC2CC[C@]3([C@H](C2)CCC2[C@@H]3CC[C@]3(C2(O)CC[C@H]3c2ccc(=O)oc2)C)C=O)OC(C1OC(=O)C)C		14.669
C/C=C(\C(=O)O[C@H]1C(=C[C@]23[C@]1(O)[C@H](O)C(=C[C@H](C3=O)[C@H]1[C@@H](C[C@H]2C)C1(C)C)CO)C)/C	Ingenol mebutate	14.4555
O[C@H]1[C@H](O[C@H]2CC[C@]3(C(=C2)CC[C@@H]2C3CC[C@]3([C@]2(O)CC[C@@H]3c2ccc(=O)oc2)C)C)O[C@H]([C@@H]([C@H]1O)O)C	Proscillaridin	13.9979
ONC(=O)c1ccc(cc1)OCCNC(=O)c1oc2c(c1CN(C)C)cccc2	PCI-24781	13.9324
COc1ccc(cc1)C(=O)N1CCC(CC1)C(=O)N1CCC(CC1)N1CCCC1=O		13.5683
CCCOc1ccc(cc1N)C(=O)OCCN(CC)CC	Proxymetacaine499-67-2	13.3384
CCN(CC(=O)Nc1ccc(cc1C(=O)c1ccccc1)Cl)CC		13.1185
COCC(=O)N1CCCC1C(=O)N1CCC(CC1)c1ccccc1		12.9721
O=C(C1CCCN1Cc1ccc(cc1)c1cc(C)cc(c1)C)NCc1ccc2c(c1)OCO2		12.7163
Clc1ccc2c(c1)C(=NCC(=O)N2CC1CC1)c1ccccc1	Prazepam	12.5198
COc1cc2N(C)[C@@H]3[C@@]4(c2cc1[C@]1(C[C@@H]2CN(CCc5c1[nH]c1c5cccc1)C[C@](C2)(O)CC)C(=O)OC)CCN1[C@H]4[C@@]([C@H]([C@]3(O)C(=O)N)O)(CC)C=CC1	VINDESINE SULFATE	12.3765
COC1CC(OC2CCC3(C(C2)(O)CC[C@@H]2[C@@H]3CCC3(C2(O)CCC3C2=CC(=O)OC2)C)C=O)OC(C1O)C	CYMARINE	12.224
CO[C@@H]1C[C@@H](CC[C@@H]1n1cnnn1)C[C@H]([C@H]1OC(=O)[C@@H]2CCCCN2C(=O)C(=O)[C@]2(O)O[C@@H](CC[C@H]2C)C[C@H](OC)/C(=C/C=C/C=C/[C@H](C[C@H](C(=O)[C@@H]([C@@H](/C(=C/[C@H](C(=O)C1)C)/C)O)OC)C)C)/C)C	Zotarolimus	11.2361
CCOc1cc(ccc1OCC)C=C1NCCc2c1cc(OCC)c(c2)OCC	Drotaverine hydrochloride	11.1364
ONC(=O)c1cnc(nc1)N1C[C@@H]2[C@H](C1)[C@H]2NCc1ccc2c(n1)ccc(c2)F	CHR-3996	10.9387
O=C(Nc1ccccc1C(=O)O)Nc1cccc(c1)C(F)(F)F	NS 1652	10.9237
N#Cc1ccc(cc1)N(n1cnnc1)Cc1ccc(cc1)Br	YM-511	10.8703
COc1ccc(cc1)Nc1ccn(n1)c1ccccc1	N-(4-Methoxyphenyl)-1-phenyl-1H-pyrazol-3-amine	10.7372
COc1cc2CC[n+]3c(c2cc1OC)c(C)c1c(c3)c(OC)c(cc1)OC	Dehydrocorydaline	10.707
CCN(Cc1ccc2c(c1)ccc(c2)COC(=O)Nc1ccc(cc1)C(=O)NO)CC	ITF2357 (Givinostat)	10.5929
CNC(=O)c1c(C)oc2c1ccc(c2)Oc1ccnc2c1ccc(c2)OCCN1CCOCC1	PF-337210	10.4027
COc1cccc(c1)c1ccc(cc1)CN1CCCC(C1)NC(=O)c1ccc(cc1)C		10.4011
OC(=O)C[C@@H](C(=O)O)NC(=O)[C@H]([C@H](O)C)NC(=O)[C@H](Cc1cncn1)NC(=O)[C@H](C(C)C)N	ISF-402	10.2713
CN(CCCC(=O)N1Cc2ccccc2CC2(C1)CCCCN2Cc1ccccc1)C		10.2317
Nc1nc(N)c2c(n1)ccc(c2)S(=O)(=O)c1ccc2c(c1)cccc2	WR-158122	9.96476
Oc1ccc(cc1)CCN1CCC(CC1)Nc1nc2c(n1Cc1ccc(cc1)F)cccc2	DESMETHYLASTEMIZOLE	9.94184
CCCCOc1nc2ccccc2c(c1)C(=O)NCCN(CC)CC	Dibucaine	9.88735
CN1CCN(CC1)c1nc(Sc2ccc(cc2)NC(=O)C2CC2)nc(c1)Nc1n[nH]c(c1)C	Tozasertib	9.7116
Cc1ccccc1N(C1CN(C1)Cc1ccccc1)C		9.67698
Clc1cc(ccc1C)NC(=O)c1nc[nH]c1C	V-144	9.66769
COc1cc(/C=C\c2ccc(c(c2)N)OC)cc(c1OC)OC	RPR-258063A	9.64881
O=C1OCC(=C1)[C@H]1CC[C@]2([C@]1(C)[C@H](O)C[C@H]1[C@H]2CC[C@H]2[C@]1(C)CC[C@@H](C2)O[C@H]1C[C@H](O)[C@@H]([C@H](O1)C)O[C@H]1C[C@H](O)[C@@H]([C@H](O1)C)O[C@H]1C[C@H](O)[C@@H]([C@H](O1)C)O)O	Digoxin	9.56672
NCCCC(P(=O)(O)O)(P(=O)(O)O)O	alendronate sodium iv, Teijin	9.51818
COc1cccc(c1N)c1cc(=O)c2c(o1)cccc2	PD-098059	9.36602
CNC(=O)[C@H](C(C)(C)C)NC(=O)[C@@H](NC(=O)C(CCN1C(=O)N(C(C1=O)(C)C)C)S)CC(C)C	REBIMASTAT	9.20985
O=C(N1CCN(CC1)C(=O)c1cc(ccc1F)Cc1n[nH]c(=O)c2c1cccc2)C1CC1	olaparib	9.1124
Cc1onc(c1)NC(=O)c1ccc(c(c1)C)C		9.0805
O=NC(c1csc(n1)N)C(=O)N[C@@H]1C(=O)N2[C@@H]1SCC(=C2C(=O)O)C=C		8.92436
ONC(=O)c1ccc(cc1)C#CCNC(=O)c1cc2c([nH]1)ccc(c2)OCCN(C)C	CRA-026440	8.89499
OCC(=O)[C@@]12O[C@@H](O[C@@H]1C[C@@H]1[C@]2(C)C[C@H](O)[C@H]2[C@H]1CCC1=CC(=O)C=C[C@]21C)C1CCCCC1	Desisobutyrylciclesonide	8.77036
CCOP(=O)(Cc1ccc(cc1)c1nc2c(s1)cccc2)OCC	Fostedil	8.75235
COc1ccc(c(c1)C(C)(C)C)O	BUTYLATED HYDROXYANISOLE	8.71081
O=C(Nc1cn2c(c1C)c(ncn2)Nc1ccc2c(c1)cnn2Cc1cccc(c1)F)OC[C@@H]1COCCN1	AC480 (BMS-599626)	8.70918
CCC(=O)O[C@@]1([C@@H](C)C[C@@H]2C1(C)C[C@H](O)[C@]1([C@H]2CCC2=CC(=O)C=CC12C)Cl)C(=O)COC(=O)CC	Beclometasone	8.68676
CN(C(=O)c1c[nH]c2c1nccc2)C		8.63508
Cc1ccc2c(c1)c(NC(=O)c1ccccc1)c([nH]2)C(=O)O		8.57988
N#CC1ON=C(C1)c1ccc(cc1F)N1C[C@@H](OC1=O)CNC(=O)C		8.55273
Cc1cnc(c(c1OCC1COC(OC1)(C)C)C)CSc1nc2c([nH]1)cccc2	analog of E-3710	8.49962
CO[C@H]1[C@@H](O)C[C@@H](O[C@@H]1C)O[C@H]1[C@@H](O)C[C@@H](O[C@@H]1C)O[C@H]1[C@@H](O)C[C@@H](O[C@@H]1C)O[C@H]1CC[C@]2([C@@H](C1)CC[C@@H]1[C@@H]2C[C@@H](O)[C@]2([C@]1(O)CC[C@@H]2C1=CC(=O)OC1)C)C	Metildigoxin	8.47566
O=C(c1ccccc1C(=O)O)Nc1ccc(cc1)S(=O)(=O)Nc1nccs1	PHTHALYLSULFATHIAZOLE	8.41856
Clc1ccc2c(c1)c(cn2c1ccc(cc1)F)C1CCN(CC1)CCN1CCNC1=O	sertindole	8.27159
COCCCOc1ccnc(c1C)CS(=O)c1nc2c([nH]1)cccc2	RABEPRAZOLE117976-89-3	8.27144
O=C1CC[C@@H]2[C@]1(C)CC[C@H]1[C@H]2CCc2c1ccc(c2)OS(=O)(=O)O	Estrone 3-sulfate	8.21481
[O-][N+](=O)C1C(=O)c2c(C1=O)ccc(c2)C		8.20613
COc1ccc(cc1)N(c1nc(C)nc2c1cccc2)C	verubulin	8.18907
COc1cc(ccc1Nc1ncc(c(n1)Nc1ccccc1P(=O)(C)C)Cl)N1CCC(CC1)N(C)C	AP26113-analog	8.1819
Oc1cc2O[C@H](c3ccc(c(c3)O)O)[C@H](Cc2c(c1)O)O	(+)-Catechin Hydrate	8.17431
COc1ccc(cc1)CN1CCC2(CC1)NC(=O)c1c(O2)cccc1		8.09946
O=C(C(C)(C)C)NNCc1ccccc1	PIVALYLBENZHYDRAZINE	8.03131
O[C@H]([C@@H](NC(=O)c1cnc2c(n1)cccc2)Cc1cccc(c1)F)C[C@H](C(=O)N)CCC(O)(C)C	CP-481715	7.95992
OC(=O)CCC(=O)N1Cc2ccccc2CC2(C1)CCCN2CC1CCCCC1		7.95965
OCCN1CCCCC1C(=O)Nc1c(C)cccc1C	droxicainide	7.90451
Nc1nnc(c(n1)c1ccc(cc1)F)c1cc(C)nc(c1)Cl	AZD4635	7.89329
CN1CCc2c([C@H](C1)c1cccc3c1OCC3)cc(c(c2)Cl)O	Odapipam acetate	7.8883
O=C(c1cnc(c(n1)OCC1CC1)N1CC(C1)(F)F)N[C@H](C(=O)N)CC1CC1	RO-6839828	7.86063
O[C@@H]1[C@H](O)[C@H](O[C@H]1n1cnc2c1ncnc2Nc1ccc(cc1F)Cl)c1nnc(o1)C(C)(C)C	GW-493838	7.83538
OC(=O)CCCCCCCCOC(=O)/C=C(/C[C@@H]1OC[C@@H]([C@H]([C@H]1O)O)C[C@@H]1O[C@H]1[C@H]([C@@H](O)C)C)\C	Mupirocin	7.83518
CN(c1ccc2c(c1)nn(c2C)C)c1ccnc(n1)Nc1ccc(c(c1)S(=O)(=O)N)C	pazopanib hydrochloride (ophthalmic)	7.71607
Fc1ccc(c(c1)F)C(C(C(=O)N)(F)F)(Cn1cncn1)O	T 8581	7.70001
N#Cc1ccc2c(c1)CN([C@@H](CN2Cc1nc[nH]c1)Cc1ccccc1)S(=O)(=O)c1cccs1	BMS-214662	7.69238
C[C@@H]1CC[C@]2([C@@H]([C@H]1C)C1=CC[C@H]3[C@@]([C@@]1(CC2)C)(C)CC[C@@H]1[C@]3(C)CC[C@@H](C1(C)C)O)C(=O)O	URSOLIC ACID	7.66994
O[C@@H]1CC[C@@H](CC1)N(c1cc(sc1C(=O)O)C#CC(C)(C)C)C(=O)[C@@H]1CC[C@H](CC1)C	lomibuvir (tablet)	7.65506
COc1ccc(cc1)[Si](COc1cc(c(c(c1)C(C)(C)C)O)C(C)(C)C)(C)C	AC-3056	7.65209
O=C(Nc1ccccc1N)/C=C/c1ccn(c1)S(=O)(=O)c1ccc(cc1)c1cnn(c1)C	4SC-202	7.63283
Cn1nc(c(c1)CN1CCC(CC1)c1ccc(cc1)C(=O)Nc1ccccc1N)C	AZD-9468	7.50108
CCN(CC(O)(C)C)CCNc1ccc(c2c1c(=O)c1c(s2)cccc1)C	BECANTHONE	7.50082
C/C(=C\CNc1ncnc2c1nc[nH]2)/CO	Zeatin	7.48196
OC[C@H]1O[C@@H](OC2[C@@H](O)CC(O[C@@H]2C)OC2[C@@H](O)CC(O[C@@H]2C)OC2[C@@H](O)C[C@@H](O[C@@H]2C)O[C@H]2CC[C@]3([C@H](C2)CC[C@@H]2C3C[C@@H](O)[C@]3([C@]2(O)CC[C@@H]3C2=CC(=O)OC2)C)C)[C@@H]([C@H]([C@@H]1O)O)O	DESLANOSIDE	7.46177
OCCCNC(=O)c1cn(CC)c2c(c1=O)cccc2		7.45592
CN(CCCN1c2ccccc2Sc2c1cc(cc2)C(F)(F)F)C	Triflupromazine hydrochloride	7.44427
OCCN(C(=O)C(Cl)Cl)Cc1ccc(cc1)Oc1ccc(cc1)[N+](=O)[O-]	CLEFAMIDE	7.44386
COc1cc2c(cc1OC)CC[N+](C2Cc1ccc(c(c1)OC)OC)(C)CCC(=O)OCCCCCOC(=O)CC[N+]1(C)CCc2c(C1Cc1ccc(c(c1)OC)OC)cc(c(c2)OC)OC	ATRACURIUM BESYLATE	7.41657
CCCCCN1CCCCC21Cc1ccccc1CNC2=O		7.39407
ONC(=O)c1ccc(cc1)NC(=O)[C@H](c1ccccc1)C(C)C	AR-42 (HDAC-42)	7.37815
CCCOc1ccc(cc1)c1nc2n(c1)cccc2		7.37664
CCc1c(C)nc2n(c1=O)c(C)ccc2	Chinoin-150	7.34372
O=C(c1cc2CCCCCCc2n(c1=O)CC1CCCCC1)NC(C(=O)N1CCC(CC1)NS(=O)(=O)C)(C)C	CB 1/2 dual agonists, Shionogi	7.33296
CN(CCc1ccccc1)C	Dimethyl(2-phenylethyl)amine	7.28463
FC(=C)c1sc(c(c1Br)C)CNCCCNc1cc(=O)c2c([nH]1)cccc2	bederocin	7.25201
NCCC(=O)N[C@H](C(=O)O)Cc1[nH]cnc1	Carnosine	7.24106
O=c1nc2c(n1)c(cc(c2)c1c(C)noc1C)c1c(nnc1C1CC1)C1CC1	GS-5829	7.2177
COc1ccccc1c1ccc(cc1)CN1CCCCC1C(=O)NCc1ccc2c(c1)OCO2		7.20411
O=C(c1sccc1NCc1ccnc2c1cccc2)Nc1ccc(cc1)OC(F)(F)F	OSI-930	7.19822
c1ccc(cn1)C1CCC2CCN1CC2	TC-1698	7.15594
CCC(C(n1cncn1)c1ccc(cc1)Nc1nc2c(s1)cccc2)CC	Talarozole	7.12995
OC(=O)c1cc(=O)c2c(o1)cc1c(c2)c2ccccc2C(O1)(C)C	PRD-92-Ea	7.04538
CO[C@@H]1[C@@H](CC[C@@]2([C@H]1[C@@]1(C)O[C@@H]1CC=C(C)C)CO2)OC(=O)/C=C/C=C/C=C/C=C/C(=O)O	Fumagillin	7.01065
Clc1cccc(c1)C(=O)NC1CCCN(C1)Cc1cccc(c1)c1ccc(c(c1)Cl)C		6.98435
CCC12CCCN3C2c2n(C(C1)O)c1c(c2CC3)cccc1	Vincanol	6.92873
O=C(N1CCCC1C(=O)N1CCC(CC1)N1Cc2c(C1=O)cccc2)N(C)C		6.91467
Fc1ccc(cc1)C(=O)CCCN1CC[C@H]2[C@@H](C1)c1cccc3c1N2CCN3C	ITI-007	6.89192
CN1C[C@H](C[C@H]2[C@H]1Cc1cn(c3c1c2ccc3)C)NS(=O)(=O)N(C)C	Mesulergine HCl	6.87383
CCC(=O)N1Cc2ccccc2CC2(C1)CCCN2CC1CCCC1		6.87183
Fc1ccc(cc1)OCCc1ccccc1O	CRE 10904	6.82717
CCCCCNC(=N)N/N=C/c1c[nH]c2c1cc(OC)cc2	TEGASEROD MALEATE	6.72503
NC(=O)OC[C@@H]1[C@H](NC(=O)/C(=N\OCC(=O)[O-])/c2csc(n2)N)C(=O)N1S(=O)(=O)[O-]	Carumonam disodium salt	6.66042
ONC(=O)CCCCCCOc1cc2c(ncnc2cc1OC)Nc1cccc(c1)C#C	CUDC-101	6.63934
Nc1cc(N)c(cc1/N=N/c1ccc(cc1)S(=O)(=O)N)C		6.60894
OC[C@H]1OC(O)[C@@H]([C@H]([C@@H]1O)O)NC(=O)c1c(I)c(NC(=O)C)c(c(c1I)N(C(=O)C)C)I	metrizamide	6.60271
CC(Cc1ccc(cc1)CCc1sc2c(c1)C(=NC(c1n2c(C)nn1)C)c1ccccc1Cl)C	Israpafant	6.56288
O=C1CC[C@]2(C(=C1)CC[C@@H]1[C@@H]2[C@H](O)C[C@]2([C@H]1CC[C@@H]2C(=O)C)C)C	stetaderm	6.51689
NC(=N)NCc1cccc(c1)I	m-Iodobenzylguanidine hemisulfate	6.48862
O=C(N1CC2C3(C1=CC(=O)c1c3c(C)cn1)C2)c1nc2c(c1)cc(cc2)NC(=O)c1cc2c(o1)cccc2	ADOZELESIN	6.43569
O=C1CN=C(c2c(N1)ccc(c2)Br)c1ccccn1	Bromazepam	6.42058
CN(CC(=O)N1Cc2ccccc2CC2(C1)CCCN2C)C		6.41879
COc1cc(ccc1O)/C=C/1\CCC/C(=C\c2ccc(c(c2)OC)O)/C1=O	Cyclovalone	6.40359
CC[C@H]1Cn2nc(c3c2c(N1CC1CC1)cc(n3)C)c1ccc(cc1Cl)Cl	NBI-35965 Mesylate	6.38337
N#Cc1ccccc1OCC(CNC(C)(C)C)O	bunitrolol	6.38315
O=C(N(C)C)NC1CCN(CC1)c1nc2c(o1)cccn2		6.34751
Ic1cc(Cl)c2c(c1O)nccc2	iodochlorhydroxyquin	6.31372
CN1C2CCC1CC(C2)OC(=O)c1cc(C)cc(c1)C	tropanserin	6.25352
CCCCCCCCCCCCCCCC(=O)N[C@H](C(=O)O)CCC(=O)NCCCC[C@@H](C(=O)N[C@H](C(=O)N[C@H](C(=O)N[C@H](C(=O)N[C@H](C(=O)N[C@H](C(=O)N[C@H](C(=O)N[C@H](C(=O)N[C@H](C(=O)NCC(=O)N[C@H](C(=O)NCC(=O)O)CCCNC(=N)N)CCCNC(=N)N)C(C)C)CC(C)C)Cc1c[nH]c2c1cccc2)C)[C@H](CC)C)Cc1ccccc1)CCC(=O)O)NC(=O)[C@@H](NC(=O)[C@@H](NC(=O)[C@@H](NC(=O)CNC(=O)[C@@H](NC(=O)[C@@H](NC(=O)[C@@H](NC(=O)[C@@H](NC(=O)[C@@H](NC(=O)[C@H](C(C)C)NC(…	Liraglutide	6.24199
O=C1NCC[C@@H]2[C@H](C1)CCN(C2)C(=O)c1ccc2c(c1)OCO2		6.18463
CO[C@H]1C[C@H](O[C@H]2CC[C@]3([C@@H](C2)CC[C@@H]2[C@@H]3CC[C@]3([C@]2(O)C[C@@H]([C@@H]3C2=CC(=O)OC2)OC(=O)C)C)C)O[C@H]([C@@H]1O)C	Oleandrin	6.18263
CCC(=O)OC1C(OC(CC1N(C)C)C)OC1C(C)C(OC2OC(C)C(C(C2)(C)OC)O)C(C)C(=O)OC(CC)C(C(C(C(=O)C(CC1(C)O)C)C)O)(C)O	Erythromycin stinoprate	6.16602
CO[C@@H]1/C=C/C=C(\C)/Cc2cc(OC)c(c(c2)N(C(=O)C[C@@H]([C@]2([C@H]([C@@H]([C@@H]3C[C@@]1(O)NC(=O)O3)C)O2)C)OC(=O)C(C)C)C)Cl	Ansamitocin P3	6.16505
c1ccc(cc1)CCNc1scc(n1)c1ccccc1	fanetizole	6.16158
COCCOCO/N=C\1/[C@H](C)C[C@@](C)(O)[C@H](O[C@@H]2O[C@H](C)C[C@@H]([C@H]2O)N(C)C)[C@@H](C)[C@H](O[C@@H]2O[C@@H](C)[C@@H]([C@](C2)(C)OC)O)[C@H](C(=O)O[C@@H]([C@@]([C@@H]([C@H]1C)O)(C)O)CC)C	roxithromycin	6.14495
CC(C[C@@H](B1OC(=O)CC(O1)(CC(=O)O)C(=O)O)NC(=O)CNC(=O)c1cc(Cl)ccc1Cl)C	MLN9708	6.07296
N#CC1=C[C@@]2(C)[C@H](C(C1=O)(C)C)CC[C@@]1(C2=CC(=O)[C@H]2[C@@]1(C)CC[C@@]1([C@H]2CC(C)(C)CC1)NC(=O)C(F)(F)C)C	RTA-63415	6.07042
N#Cc1ccc(nc1)NCCNCC(=O)N1CCC[C@H]1C#N	NVP-728	6.04763
COc1ccc(cc1OC)c1c(C(=O)OC)c(C(=O)OC)c(c2c1c(OC)c(OC)c(c2)OC)O	TA-7552	6.03618
CCC(C(=O)O)(C)C	ST-20	6.0253
[NH-]c1on[n+](c1)N1CCOCC1	LINSIDOMINE	5.9909
NC1C[C@@]2([C@H]1CN(C2)c1nc2c(cc1F)c(=O)c(cn2C1CC1)C(=O)O)C	ECENOFLOXACIN	5.99062
Cc1ccc(cc1)C(=O)c1cc(O)c(c(c1)[N+](=O)[O-])O	tolcapone	5.98218
CC(=O)Oc1ccc(cc1C(=O)O)/N=N/c1ccc(cc1)S(=O)(=O)Nc1nc(C)cc(n1)C	disalazine	5.96254
OC(c1ccccc1)CN1CCN(CC1)C(c1ccccc1)c1ccccc1		5.91339
O[C@@H]([C@H](Cc1ccc(cc1)OCC(=O)N1CCOCC1)NC(=O)OC(C)(C)C)CNC[C@H]([C@H](Cc1ccccc1)NC(=O)OC(C)(C)C)O	BMS 186318	5.90214
O=C1OC(CN1/N=C/c1ncc(n1C)[N+](=O)[O-])CN1CCOCC1	moxnidazole	5.89953
OC(=O)CCC(=O)N1Cc2ccccc2CC2(C1)CCCCN2CCc1ccccc1		5.8987
COc1ccc(cc1)CC(=O)N1Cc2ccccc2CC2(C1)CCCCN2C		5.89711
Clc1ccc(cc1)NC(=O)N1CCCC1C(=O)N1CCC(CC1)N1Cc2c(C1=O)cccc2		5.87033
COc1cc2c(cc1O)occ(c2=O)c1ccc(cc1)O	Glycitein	5.85996
O=C1NC2=Nc3c(CN2C1C)c(C)c(cc3)Br	Ro-15-2041	5.83817
OCCNc1nc(CCC)nc(n1)N1CCOCC1	UCB-11056	5.83344
N#Cc1cc(ccc1OCC(C)C)c1nc(c(s1)C(=O)O)C	febuxostat	5.82642
N#Cc1ccc(cc1OC[C@@H](CNC(CC1Cc2c(C1)cccc2)(C)C)O)CCC(=O)O	SB-228357	5.81538
O=C(Nc1c(C)cccc1C)NCCCNC(=O)C		5.81397
Fc1ccc(cc1)[C@@]1(Cn2cncn2)O[C@H]1c1ccccc1Cl		5.80486
Clc1cncc(n1)C1CN2CCC1CC2	L 689660	5.75656
COCCCNC(=O)c1c[nH]c2c1cccn2		5.74529
Oc1ccc(cc1)C(=O)N/N=C/c1ccc(o1)[N+](=O)[O-]	NIFUROXAZIDE	5.74506
C[C@H](N1CC[C@@H](C1=O)NS(=O)(=O)/C=C/c1ccc(s1)Cl)C(=O)N1CCOCC1	GW-813893	5.74283
CCS(=O)(=O)c1ccc2c(c1)nc(o2)c1ccc2c(c1)cccc2		5.72961
CNCC(c1ccc(c(c1)OC(=O)C(C)(C)C)OC(=O)C(C)(C)C)O	dipivefrin	5.72342
O=C(c1ccccc1)N1CCC(CC1)N1Cc2c(C1=O)cccc2		5.72262
COCCOCCOc1ccc(c(c1)O)C1=N[C@@](CS1)(C)C(=O)O	SP-420	5.71885
N#CC1=C(N)Oc2c(C1c1cc(Br)c(c(c1)OC)OC)ccc(c2N)N	Crolibulin	5.7185
CCOc1ccc(cc1)CC(N(CC(=O)O)CC(=O)O)CN(CC(=O)O)CCN(CC(=O)O)CC(=O)O	Gadoxetate disodium	5.69018
O=C(/C=C\n1cnc(n1)c1cc(cc(c1)C(F)(F)F)C(F)(F)F)NNc1cnccn1	Selinexor	5.67925
COc1c([nH]c(=O)c([n+]1[O-])CC(C)C)Cc1c[nH]c2c1cccc2	OPC 15161	5.65928
NC(=O)NNc1ccccc1	PHENICARBAZIDE	5.65452
CC(=O)OC1CC2(C(/C/1=C(\C(=O)O)/CCC=C(C)C)CC(C1C2(C)CCC2C1(C)CCC(C2C)O)O)C	fusidic acid, Cempra	5.61175
CCCNc1nnc(c(c1)CC)c1ccccc1		5.57039
CCCCCCCCCCCCCCCCCCCCCCCCCCCCO	OCTACOSANOL	5.55707
N#Cc1ccc(cc1)NC(=O)N[C@@H]1CCN([C@H](C1)c1nc2c([nH]1)cccc2)C	glasdegib	5.5359
CC1CCCCC1NC(=O)c1ccc2n(c1)ccn2		5.53069
O=C1NC2(CN(C2)CC2CCCC2)Cc2c1cccc2		5.52573
O=C1CC[C@@]2(N1)CC[C@@](NC2)(CO[C@@H](c1cc(cc(c1)C(F)(F)F)C(F)(F)F)C)c1ccccc1	Rolapitant hydrochloride	5.51533
O[C@@H]1[C@H](O)[C@H](O[C@H]1n1cnc(c1N)C(=O)NCc1ccc(cc1)[N+](=O)[O-])COP(=O)(O)O	GP-668	5.5128
C=CC(=O)Nc1cc2c(ncnc2cc1OCCCN1CCOCC1)Nc1ccc(c(c1)Cl)F	Canertinib dihydrochloride	5.50421
O=C1C(CCc2c1c1ccccc1n2C)Cn1ccnc1C		5.49747
CC(=O)N1Cc2ccccc2CC2(C1)CCCN2C		5.4903
OC(=O)CC1C2CCCC1CN(C2)Cc1ccc2c(c1)Nc1c(S2)nccn1	ER-49890	5.49017
COc1ccccc1N1CCN(CC1)CCc1ccc2c(c1)sc(=O)n2C	S 203961	5.48075
N#Cc1cc(ccc1OCC(C)(C)C)n1ncc(c1)C(=O)O	Piraxostat	5.42278
c1ccc(nc1)N1CCN(CC1)Cc1nc2c([nH]1)cccc2	ABT-724	5.42107
COC(=O)C1=C(C)NC(=C(C1c1cc(ccc1F)[N+](=O)[O-])C(=O)OCC(CN(Cc1ccccc1)C)(C)C)C	PALONIDIPINE	5.41782
OCC(CCn1cnc2c1nc(N)[nH]c2=O)CO		5.41276
CC/C=C\C/C=C\C/C=C\C/C=C\C/C=C\CCCC(=O)NCCNC(=O)c1cccnc1	CAT-2054	5.38304
O=C(c1cccn2c1ncc2)NCc1cccnc1		5.38221
CCNCCS(=O)(=O)NCC1(SC(=NN1C(=O)C(C)(C)C)NC(=O)C(C)(C)C)c1ccccc1	litronesib	5.38156
O[C@H]1CCC2[C@]1(C)CCC1C2CC[C@@]2([C@]1(C)C=CC(C2)(C)O)C		5.37333
Clc1ccc2c(c1)C(=O)N1C(O2)CCO1	seclazone	5.36016
O=C(N1CCC[C@](C1)(CCCN1CCC(CC1)(c1ccccc1)N(C(=O)C)C)c1ccc(c(c1)Cl)Cl)c1ccccc1	Osanetant	5.35292
OC[C@H]1O[C@H](S[Au])[C@@H]([C@H]([C@@H]1O)O)O	Aurothioglucose	5.34826
NC(=O)C[C@H](C(=O)O)NC(=O)C	aceglutamide aluminium	5.32664
OCc1cccc(c1O)Cc1c[nH]cn1	LEDAZEROL	5.32118
CCC/C=C/1\OC(=O)C2=C1CCC=C2	Ligustilide	5.31714
Clc1ccc2c(c1)cc(o2)C1CCNCC1		5.30267
CN([C@H]1CC[C@]2(C(=CC[C@@H]3[C@@H]2CC[C@]24[C@H]3CC[C@@H]4[C@@H](N(C2)C)C)C1)C)C	CONESSINE	5.29876
NC1CN(C1)c1c(F)cc2c(c1Cl)n(cc(c2=O)C(=O)O)C1CC1	E 5065	5.29341
CC(CCN1CCC2(CC1)NC(=O)c1c(O2)cccc1)C		5.28796
O=C(c1ccc2c(c1)OCO2)N1CCCCC1	BDP	5.2696
O[C@@H]1CN2[C@@H]([C@@H]1O)[C@H](O)CCC2	SWAINSONINE	5.2693
CCCCCCCCOCCOC(=O)CN(c1ccccc1OCCOc1ccccc1N(CC(=O)OCCOCCCCCCCC)CC(=O)O)CC(=O)O	DP-b99	5.25211
O=C(C1CC(=O)N(C1)c1ccc(cc1)F)Nc1ccc(cc1)OCc1ccccc1		5.24105
COc1ccc(cc1)c1sc(cc1c1ccc(cc1)OC)CCCC(=O)N(O)C	S 19812	5.23008
CNC(=O)c1ccccc1Sc1ccc2c(c1)[nH]nc2/C=C/c1ccccn1	Axitinib	5.20973
Fc1cccc(c1)CN1CCCCC21Cc1ccccc1CNC2=O		5.19484
CCC(=O)N1Cc2ccccc2CC2(C1)CCCN2Cc1ccc(cc1)OC		5.1902
CC(=O)Nc1ccc(cc1F)/C=N/NC(=S)N	KBF-611	5.18921
CCCn1c(=O)[nH]c(=O)c2c1nc[nH]2	enprofylline	5.17945
COc1cc(CCNCC(c2ccccc2)O)ccc1OC		5.17838
CNCc1ccc(c(c1)[C@]1(c2cc(Cl)ccc2N(C1=O)S(=O)(=O)c1ccc(cc1)OC)N1CCC[C@H]1c1ncco1)OC		5.17002
CCCCOC(=O)NS(=O)(=O)c1ccc(cc1c1ccc(cc1)Cn1c(CC)nc2c1nc(C)cc2C)CCC	L 162389	5.16173
COc1ccccc1C1CCN(C1)Cc1ccc2c(c1)OCCO2	(no name)	5.15315
NCCCC(CC(=O)NCC1NC(=O)C(CO)NC(=O)C(N)CNC(=O)C(NC(=O)/C(=C/NC(=O)N)/NC1=O)C1CCNC(=N)N1)N	CAPREOMYCIN SULFATE	5.1416
COc1ccc(cc1c1ccc(cc1)CN1CCC(C1)NC(=O)c1ccccc1Cl)F		5.13978
Cc1ccc(cc1)C1(O)CCN(CC1)CCCC(=O)c1ccc(cc1)F	MOPERONE	5.11914
Clc1cccc(c1)[C@]1(O)OCC(N[C@H]1C)(C)C	Radafaxine hydrochloride	5.09701
CCc1ccc(cc1)/C=C/1\SC(=N)NC1=O		5.08866
OCCOc1cc(O)c2c(c1)oc(c(c2=O)O[C@@H]1O[C@H](CO[C@@H]2O[C@@H](C)[C@@H]([C@H]([C@H]2O)O)O)[C@H]([C@@H]([C@H]1O)O)O)c1ccc(c(c1)OCCO)OCCO	Factor P-Zyma	5.08509
COCc1cc(OC)c(c(c1)OC)c1cccc2n1nc(c2N(CC1CC1)CC1CCOCC1)CC	E-2508	5.06694
COc1ccc(cc1C(=O)N1CCN(CC1)c1cccc(c1)Cl)Cl	CB-694	5.05653
CC(CCN1CCCC21Cc1ccccc1CNC2=O)C		5.05581
N#Cc1cncc(c1)N1C[C@@H]2[C@H]1CNC2	A-366833	5.0549
N=C(Nc1ccn(n1)CCCCC(=O)N)NCC(F)(F)F	ICI-162846	5.04311
OC(CNC(C)(C)C)COc1ccc(cc1)NC(=O)NC1CCCCC1	Talinolol	5.01688
NCCCNCCCCNCCCN	SPERMINE	5.0076
Clc1cccc(c1NC1=NCCN1)Cl	Clonidine hydrochloride	5.00597
CCC(=O)O[C@@]1(CC[C@@H]2[C@]1(C)CC[C@H]1[C@H]2CCC2=CC(=O)CC[C@]12C)C(=O)CO	Cortexolone 17alpha-propionate	4.98831
COc1c2c(CCC(c3c2ccc(c(=O)c3)SC)NC(=O)C)cc(c1OC)OC	CGX-6001-B	4.98808
CCOc1ccc(cc1)OCC(=O)C1CCCC1		4.98613
Oc1ccc2c(c1)C=CC1C2CCC2(C1CCC2=O)C	_q_Delta(8,9)-dehydroestrone sulfate_q_	4.98519
N1C[C@@H]2C[C@H](C1)c1c2cc2c(c1)nccn2		4.96651
CN(Cc1ccccc1Sc1cccc(c1)O)C	Moxifetin hydrogen maleate	4.94513
OC(=O)CCCc1ccc(cc1)C(NS(=O)(=O)c1ccc(cc1)F)CCCC(C(F)(F)F)(F)F	(+)-RS 635	4.90576
Cc1cc(Nc2ccc(cc2)S(F)(F)(F)(F)F)n2c(n1)nc(n2)C(F)(F)C	DSM-265	4.90418
CCCC(C(=O)O)CCC		4.90055
CN1CCC2=C(C1)C(c1ccccc1)c1c2cccc1	PHENINDAMINE	4.89202
Oc1cc(O)c2c(c1)oc(cc2=O)c1ccc(c(c1)O)O	Luteolin	4.88602
N#Cc1ccc(cc1)CN1CCCCC21Cc1ccccc1CNC2=O		4.88582
CCCCOc1cc(N)c(cc1C(=O)NC1CCN(CC1)CC1OCCO1)Cl	dobupride	4.88124
CCCCCCC1C(=O)O[C@H](C)[C@@H](C(=O)O[C@H]([C@@H]1OC(=O)CC(C)C)C)NC(=O)c1cccc(c1O)NC=O	Antimycin A	4.87826
CCCN(C1CCc2c(C1)c(O)ccc2F)CCC	UH 301	4.85838
O=C(c1ccccc1)NC1CCCN(C1)c1nc2c(o1)cccn2		4.85738
CCNC(=O)[C@@H]1CCCN1C(=O)[C@@H](NC(=O)[C@@H](NC(=O)[C@@H](Cc1ncn(c1)Cc1ccccc1)NC(=O)[C@H](Cc1ccc(cc1)O)NC(=O)[C@@H](NC(=O)[C@H](Cc1c[nH]c2c1cccc2)NC(=O)[C@H](Cc1cnc[nH]1)NC(=O)[C@@H]1CCC(=O)N1)CO)CC(C)C)CCCN=C(N)N	histrelin	4.85672
O=C(N[C@@H]1CN(C2CCCCC2)c2c(N(C1=O)CC(=O)C(C)(C)C)cccc2)Nc1cccc(c1)C(=O)O	Z-360	4.85509
CC(C(OC(=O)N)C)C(OC(=O)N)C	PENTABAMATE	4.83893
Cc1cc2c(cc1C(=C)c1ccc(cc1)C(=O)O)C(C)(C)CCC2(C)C	Bexarotene	4.83445
O=C(/C=C(/C=C/C=C(/C=C/C1=C(C)CCCC1(C)C)\C)\C)OCC(=O)C(C)(C)C	MDI-101	4.817
OC(=O)CNC(=O)Oc1cc(ccc1O)c1oc2cc(O)cc(c2c(=O)c1O)O	QC-12	4.80739
O=C(c1ccc(cc1)O[C@@H]1C[C@H](C1)N1CCCCC1)N1CCOCC1	analog of UCB-2892	4.8063
C/C(=C\C=C\c1ccc(cc1)C(=O)O)/C=C/C1=C(C)CCCC1(C)C	Pelretin	4.80431
O=C(C1NC(=O)N(C1)c1ccccc1)NCC1CC1		4.79161
NCCc1ccc(c(c1)O)O	Intropin	4.7863
CNc1cccc(n1)CCOc1ccc2c(c1)CN(CC(F)(F)F)C(=O)[C@@H](C2)CC(=O)O	SB-273005	4.77419
CC[C@@H]([C@@H](C(=O)N1CSCC1)N)C	Isoleucine-thiazolidide	4.77366
CCCCC(=O)OC1CCC2C1(C)CCC1C2CCc2c1ccc(c2)O	Estradiol valerate	4.7694
FC(CNC(=O)c1ccc(cc1)n1[nH]c2c(c1=O)nnc1c2cccc1F)F	RHUDEX	4.75724
O=C(C1c2ccccc2Oc2c1cccc2)OCC[N+](C(C)C)(C(C)C)C	Pro-Banthine50-34-0	4.74849
OC[C@@H]1O[C@@H](O[C@H]2[C@H](O[C@@H]3[C@@H](O)[C@H](O)[C@H]([C@@H]([C@H]3NC(=N)N)O)NC(=N)N)O[C@H]([C@]2(O)CO)C)[C@H]([C@@H]([C@H]1O)O)NC	DIHYDROSTREPTOMYCIN SULFATE	4.7393
CCOC(=O)CNC(=O)CCCCSc1ncnc2c1ncn2	butocin	4.73873
O=C1c2c(NCC[N+](C)(C)[O-])ccc(c2C(=O)c2c1c(O)ccc2O)NCC[N+](C)(C)[O-]	Banoxantrone	4.72931
COc1cccc(c1)C(=O)N(Cc1ccc(cc1)c1ccccc1)C		4.72531
ClC(C(=O)N(c1ccc(cc1)O)C)Cl	DILOXANIDE	4.7247
COc1ccc2c3c1OC1C43CCN(C(C2)C4(O)C=CC1=O)C	14-Hydroxycodei	4.72414
C1CCN(CC1)CCN(c1ccccc1)Cc1ccccn1	PICOPERINE	4.72206
CC(=O)Nc1ccc(cc1)C(=O)NC(C)(C)C	REN-1189	4.71731
NCCCC[C@@H](C(=O)N[C@H](C(=O)N[C@H](C(=O)N[C@H](C(=O)N[C@H](C(=O)NCC(=O)N[C@H](C(=O)O)CCC(=O)N)CCCCN)CC(=O)N)CCCNC(=N)N)CCC(=O)O)NC(=O)[C@@H](NC(=O)[C@@H](NC(=O)[C@@H](NC(=O)[C@@H](NC(=O)[C@@H](NC(=O)[C@@H](NC(=O)[C@@H](NC(=O)CNC(=O)[C@@H](NC(=O)[C@H]([C@H](O)C)NC(=O)[C@@H](NC(=O)[C@H]([C@H](CC)C)NC(=O)[C@@H]1CCCN1C(=O)[C@H](C(C)C)NC(=O)[C@H](Cc1ccccc1)N)Cc1ccccc1)Cc1ccc(cc1)O)CCC(=O)O)CC(C)C)CCC…	[Leu13]-Motilin	4.69753
OB([C@@H](NC(=O)CNC(=O)c1cc(Cl)ccc1Cl)CC(C)C)O	Ixazomib	4.68982
CCCCCCCCC(=O)O	NONANOIC ACID	4.68888
Cc1ccc(=O)n(c1)c1ccccc1	Pirfenidone	4.68879
COc1ccc(cc1C(=O)NCc1ccc(cc1)C(F)(F)F)CC1SC(=O)NC1=O	MK-767	4.68769
CCNCCc1ccc(cc1)CN(c1cc(OC)ccc1[C@@H]1CCc2c(C1)ccc(c2)O)CC	Elacestrant (dihydrochloride)	4.65466
Cc1cc2c(n1C)nc(nc2N1CCCC1)N1CCCC1	U-89843A	4.63568
NC(=O)Cn1c(=O)cc(c2c1cc(F)cc2)CCN1CCN(CC1)c1nccc2c1ccs2	TRELANSERIN	4.62566
CC(Oc1ccc(cc1C(=O)C)C(=O)Nc1cc(Cl)c2c(c1Cl)CNCC2)C	406725	4.6187
CCN(c1ccc(cc1)n1nc2c(n1)cc(c(c2)N)C)CC	SMT-C1100	4.60635
CN1CC(=CCC1)c1nc(sc1Cl)N	ORG 20091	4.60058
COc1ccc(cc1)C(=O)N1CCC2(C1)Cc1ccccc1NC2=O		4.59602
CCC(NS(=O)(=O)CCN1C(=O)c2c(C1=O)cccc2)C		4.59417
NC(=N)NCCNS(=O)(=O)c1cccc2c1ccnc2	HA-1004	4.59377
NCCCC[C@@H](C(=O)N1CCC[C@@H]1C(=O)N[C@H](C(=O)O)[C@H](O)C)N		4.59324
O=C(C12CC3CC(C2)CC(C1)C3)OCCCC[N+](C)(C)C		4.58125
CC(NC(C)(C)C)CC(c1ccccc1)c1ccccc1	terodiline	4.57414
CCCN(CCc1ccc(c(c1)OCCc1ccccc1)OC)CCC	NE-100	4.56381
OC(=O)Cc1ccc2c(c1)cco2		4.5597
CN1CCN(CC1)CCCN1c2ccccc2Sc2c1cc(Cl)cc2	10H-Phenothiazine, 2-chloro-10-[3-(4-methyl-1-piperazinyl)propyl-	4.55532
SCC(C(=O)N[C@H](C(=O)O)Cc1ccc(cc1)n1cccn1)C(C)C	GW-796406	4.55249
CC(=O)SCC(C(=O)N[C@H](C(=O)O)C)Cc1ccc2c(c1)OCO2		4.53578
CCCOc1ccc2c(c1)nc([nH]2)NC(=O)OC	Oxibendazole	4.52428
O=C(N1C2CCC1CN(C2)C1CCNCC1)NC1CCCCC1		4.50607
O=C(c1cccc(c1)CCNC(=O)[C@@]12CC[C@H]([C@@H]2[C@@H]2[C@](CC1)(C)[C@]1(C)CC[C@@H]3[C@]([C@H]1CC2)(C)CC[C@@H](C3(C)C)O)C(=C)C)NCc1ccc(cn1)C(=O)NCCc1ncnc1	MPC-9055	4.49987
O=C(N[C@H](C[C@@H]([C@@H](NC(=O)[C@H](C(C)C)NC(=O)OCc1ccccn1)Cc1ccccc1)OC(=O)C)Cc1ccccc1)OCc1cccnc1		4.48901
Clc1ccc(cc1)C(=O)N1CC2(CCN(CC2)C2CCCCC2)Cc2c1cccc2		4.47436
CCOC(=O)Nc1ccc(cc1)SCC1COC(O1)(Cn1cncc1)c1ccc(cc1)OC	ERBULOZOLE	4.47406
O=C(CC(C)(C)C)OCC(=O)[C@@]1(O)CC[C@@H]2C1(C)C[C@H](O)[C@H]1[C@H]2CCC2=CC(=O)C=CC12C	PREDNISOLONE TEBUTATE	4.46333
COC(=O)c1cc(O)nc(n1)O		4.4607
CNCC(=O)N[C@@H](C(C)(C)C)C(=O)N[C@H]([C@@H](CN(C(=O)NC(C)(C)C)CCC(C)C)O)Cc1ccccc1	Droxinavir	4.4389
COc1ccc(c(c1)Cl)C(CC(CC(C)(C)C)C)O		4.43633
CCCCOC1=C(C(=O)C1=O)OCCCC		4.4352
O=C(C1CCCN1Cc1cccc(c1)c1ccc(c(c1)Cl)C)NCc1ccccc1Cl		4.42713
Nc1nc(cc(n1)c1ccc(c2c1cccc2)F)C(C)C	RS-127445	4.42025
OC[C@H]1O[C@H]([C@@H]([C@@H]1O)O)n1cnc(nc1=O)N	5-Azacytidine	4.40786
Clc1ccc2c(c1)N(C(=O)N)c1ccccc1CO2	SQ-10996	4.40208
CN1C[C@@H](C[C@H]2[C@H]1Cc1cn(c3c1c2ccc3)C(C)C)C(=O)N[C@H]1CCC[C@H]1O	LY 215840	4.39108
CCCCCc1cc(O)c(c(c1)O)[C@@H]1C=C(C)CC[C@H]1C(=C)C	Cannabidiol	4.38137
CC[C@@H]([C@H](N(C(=O)[C@H](C(C)C)NC(=O)[C@@H](N(C)C)C(C)C)C)[C@@H](CC(=O)N1CCC[C@H]1[C@@H]([C@H](C(=O)N[C@H](c1nccs1)Cc1ccccc1)C)OC)OC)C	Dolastatin 10	4.37563
COc1ccccc1N1CCN(CC1)C(=O)Cn1c(=O)[nH]c2c(c1=O)cccc2		4.37335
COc1cc2N(C)[C@@H]3[C@@]4(c2cc1[C@]1(C[C@@H]2CN(CCc5c1[nH]c1c5cccc1)C[C@](C2)(O)CC)C(=O)OC)CCN1[C@H]4[C@@]([C@H]([C@]3(O)C(=O)OC)OC(=O)C)(CC)C=CC1	Vinblastine sulfate salt	4.36094
NNCCc1ccccc1	Phenelzine sulfate	4.35844
FC(Oc1ccc(c2c1oc1c2cncc1)C(=O)Nc1c(Cl)c[n+](cc1Cl)[O-])F	Revamilast	4.3423
Nc1c2CCCCc2nc2c1cccc2	9-AMINO-1,2,3,4-TETRAHYDROACRIDINE HYDROCHLORIDE	4.33775
Brc1cc(Br)c2c(c1O)nccc2	BROXYQUINOLINE	4.33756
CN(CCSc1ccc(s1)/C=c/1\[nH]c(=O)/c(=C/c2ccccc2)/[nH]c1=O)C	XR 5118	4.33402
O=C(c1c[nH]c2c1cccn2)N1CCC(CC1)Cc1ccccc1		4.33281
O=C1CCC2=C3[C@H](C[C@]4([C@H](C3CCC2=C1)CC[C@@]14OCCC1=C)C)c1ccc(cc1)C(=O)C	Org-33628	4.3327
CC[C@]1(c2cccc(c2)NS(=O)(=O)C)[C@H]2[C@@H]1CN(C2)CC1(O)Cc2c(C1)cccc2	CP-866087	4.33048
OC[C@@]1(O)C[C@H]2O[C@]1(C)n1c3c4n2c2ccccc2c4c2c(c3c3c1cccc3)CNC2=O	Lestaurtinib	4.32574
CCC(C1OC2(C=CC1C)OC1C/C=C(\C)/C(OC3CC(OC)C(C(O3)C)OC3CC(OC)C(C(O3)C)NC(=O)C)C(C)/C=C/C=C\3/C4(C(C(=O)OC(C2)C1)C=C(C)C(C4OC3)O)O)C		4.32176
COc1cc2CN(CCc3ccc(cc3)NC(=O)c3cccc4c3[nH]c3c(OC)cccc3c4=O)CCc2cc1OC	elacridar	4.31176
COc1cc(cc(c1OC)OC)[C@H]1[C@H]2C(=O)OC[C@@H]2Cc2c1cc1OCOc1c2	Deoxypicropodophyllin	4.30579
O=C1CC[C@]2(C(=C1)CC[C@@H]1[C@@H]2CC[C@]2([C@H]1CC[C@]2(OC(=O)C)C(=O)C)C)C	17-Acetoxyprogesterone	4.30325
Fc1ccc(cc1)C(=O)CCCN1CCC(CC1)C(=O)c1ccc(cc1)Cl	CLOROPERONE	4.29014
OC(=O)C(C1O[C@@H]([C@@H]([C@@H]1O)O)n1ccc(=O)[nH]c1=O)NC(=O)C(C(C(c1ccc(cn1)O)O)C)N	Neopolyoxin C	4.28242
CCNC(=O)Nc1ncnc2c1ncn2[C@@H]1O[C@@H]([C@@H]2[C@H]1O[C@H](O2)/C=C/c1ccccc1)COP(=O)(O)O	Regrelor disodium	4.27524
COc1ccc(cc1)S(=O)(=O)n1cc(c2c1ccc(c2)OC)CCC(=O)O	PLX-204	4.2701
CCCCCC(/C=C/n1cncc1)OCc1ccccc1	midazogrel	4.26259
Fc1ccc(cc1)CNC(=O)C1N=C(N(C(=O)C1=O)C)C(NC(=O)c1nnc(o1)C)(C)C	raltegravir	4.25167
CCN1CCCCC21CN(Cc1c(C2)cccc1)C(=O)C1CCN(CC1)C		4.24905
NCC(=O)N1Cc2ccccc2CC21CCCN(C2)C(=O)Cc1ccc(cc1)OC		4.24248
Clc1ccc2c(c1)C(=NCc1n2cnn1)c1ccccc1Cl		4.2375
O=C1O[Pt]2(OC1=O)N[C@H]1[C@H](N2)CCCC1	AR-726	4.23742
COc1cc(ccc1OC)C1NC(=O)C(S1)C	mezolidon	4.23407
CCCCNc1nc(NC)nc(c1SC)Cl		4.23261
CN(CCNC(=O)COc1c2cccc1Cc1cccc(c1OCC(=O)NCCN(C)C)Cc1c(c(Cc3c(c(C2)ccc3)OCC(=O)NCCN(C)C)ccc1)OCC(=O)NCCN(C)C)C	KM-0118	4.22298
O[C@@H](C(=O)N[C@@H]1C(=O)N2[C@@H]1SCC(=C2C(=O)[O-])CSc1nnnn1C)c1ccccc1	CEFAMANDOLE SODIUM SALT	4.21804
CON(C(=O)[C@@H]([C@@H](NC(=O)c1cc2c([nH]1)ccc(c2)Cl)Cc1ccccc1)O)C	CP-316819	4.21722
COc1ccccc1C(=O)N1CC(C1)N(c1ccccc1C)C		4.2061
COC(=O)COc1cccc(c1)CCc1nc(c(o1)c1ccccc1)c1ccccc1		4.19209
CCn1c(=O)cc(c2c1nc(C)cc2)c1cccc(c1)Br	YM 58997	4.18959
O=C(C1CCCCC1)Nc1on[n+](c1)N1CCOCC1	CICLOSIDOMINE	4.1848
CCC(=O)O[C@H]1CC[C@@H]2C1(C)CC[C@H]1[C@H]2CCC2=CC(=O)CCC12C	Testosterone propionate	4.18209
SCC(C(c1ccccc1)C)C(=O)NC(C(=O)O)C		4.1795
OCC(=O)[C@H]1CC[C@@H]2[C@]1(C)CC[C@H]1[C@H]2CCC2=CC(=O)CC[C@]12C	DESOXYCORTONE	4.17672
COc1cccc(c1)C(=O)NC[C@@H]1CC[C@H]2C[C@@H]1C2(C)C		4.17599
COc1cc(OC)c(cc1/C=C/C(=O)c1ccc(cc1)C(=O)O)c1cc2c([nH]1)cccc2	VCAM-1 antagonists, AtheroGen	4.16602
CCCCCCCCCCCCCCCCSCC(COP(=O)(OCC[N+](C)(C)C)[O-])COC	Ilmofosine	4.15888
CC(Cn1cnc2c1c(=O)n(C)c(=O)n2C)C	Isbufylline	4.15735
OCC(=O)[C@H]1[C@H](C)C[C@@H]2C1(C)C[C@H](O)[C@]1([C@H]2C[C@@H](C2=CC(=O)C=CC12C)F)F	DIFLUCORTOLONE	4.1563
CCCCN(c1nc(C)nc2c1c(C)cn2c1c(C)cc(cc1C)C)CC	CP-154526	4.14826
O=[Bi]O[Bi]=O	BISMUTH OXIDE	4.14665
OC(COC(=O)N)COc1ccc(cc1)Cl	Chlorphenesin carbamate	4.13166
N#C/C(=C(/O)\C)/C(=O)Nc1ccc(cc1)C(F)(F)F	2-cyano-3-hydroxy-n-[4-(Trifluoromethyl)phenyl]but-2-enamide	4.12748
CCSc1ccc2c(c1)N(CCCN1CCN(CC1)C)c1c(S2)cccc1	Thiethylperazine dimalate	4.12363
N#CN/C(=N\C(CC)(C)C)/Nc1cccnc1	Guanidine	4.12075
O=C(C1CCCCCC1)N[C@@H](C(=O)C(=O)N/N=C/1\SC[C@H](N1C)C)C1CCOCC1	ONO 5334	4.1186
O=C(N[C@H](C(=O)Nc1ccc(cc1)C1S/C(=N\c2cccc(c2)F)/N(C1=O)Cc1ccco1)C)Cc1ccccc1	BMS-824	4.11677
OC(=O)/C=C(\C(=C\c1ccc2c(c1)cc1c(c2)C(C)(C)CCC1(C)C)\c1cccc(c1)C(=O)O)/C	BMS-188184	4.11403
CCCCN(Cc1ccc(c(c1)c1ccccc1C)C(=O)N[C@@H](C(=O)O)CCSC)CCC1CCCCC1	A 228839	4.11052
Clc1ccc(cc1)Nc1cc2nc3cc(C)ccc3n(c2cc1=N)c1ccc(cc1)Cl		4.1091
O=C1NN=C(C(C1)C)c1ccc2c(c1)OCC(=O)N2	Bemoradan	4.10902
Oc1ccc(nn1)N1CCN(CC1)c1ccccc1		4.10603
CC(=O)OC(COC(=O)C)COC(=O)C	Triacetin	4.10596
COc1cc(N)c(cc1C(=O)NCC1CCN(CC1)CCC(c1ccc(cc1)F)OC(=O)N)Cl	Relenopride hydrochloride	4.09999
NC(=NCCC[C@@H]1NC(=O)[C@@H](Cc2ccc(cc2)O)NC(=O)CS(=O)C[C@H](NC(=O)[C@@H](NC(=O)CNC1=O)CC(=O)O)C(=O)O)N	G-4120	4.09441
CN[C@@H]1C[C@H]2O[C@]([C@@H]1OC)(C)n1c3ccccc3c3c1c1n2c2ccccc2c1c1c3CNC1=O	Staurosporine	4.09279
OC(=O)CCCCCCNC1c2ccccc2CCc2c1cccc2	amineptine	4.0797
OC[C@@H](C(=O)Nc1cc(/C=C\c2cc(OC)c(c(c2)OC)OC)ccc1OC)N	AVE-8062	4.06977
OC[C@H]([C@H]([C@@H](c1c[nH]c(n1)/C(=N/O)/C)O)O)O	LX-2931	4.06017
NCCCC[C@@H](C(=O)Nc1ccc(cc1C)c1nc2c(s1)ccc(c2)F)N	Phortress	4.05744
[O-][N+](=O)O[C@@H]1CO[C@H]2[C@@H]1OC[C@@H]2O	isosorbide mononitrate, Hassle	4.04957
COc1nc(N)c2c(n1)n(cn2)C1CCCCC1		4.0424
CN[C@@H](C(=O)N[C@@H](C(=O)N[C@@H](C(=O)N[C@@H](C(=O)N[C@@H](C(=O)N)CC(C)C)Cc1ccccc1)Cc1ccccc1)C(C)C)CC(C)C	PPI 1019	4.03917
Brc1cc(ccc1OCCCOc1ccc(cc1Br)C(=N)N)C(=N)N	DIBROMPROPAMIDINE	4.03289
OC(=O)COc1c(cc(cc1C(C)(C)C)SC(Sc1cc(c(c(c1)C(C)(C)C)O)C(C)(C)C)(C)C)C(C)(C)C	AGIX 4207	4.02676
CC(c1c(O)cc(cc1O)/C=C/c1ccccc1)C	542358 3,5-Dihydroxy-4-isopropylstilbene	4.01947
O[C@@H]1C[C@H](N(C1)C(=O)C)C(=O)O	OXACEPROL	4.01815
CCC1(CCC(=O)NC1=O)c1ccc(cc1)N	Aminoglutethimide	4.01689
COC(=O)Nc1[nH]c2c(n1)cc(cc2)C(=O)c1ccccc1	Mebendazole	4.01301
CN1CCC(CC1)C(=O)N1CCC2(CC1)CN(Cc1c(O2)cccc1)C(=O)C		4.01103
Oc1ccc(cc1)OCc1ccccc1	MBEH	4.00311
CN(CCNc1nccc(n1)NCc1ccc(cc1)CNc1nc(Cl)ncc1F)C		3.99928
CN(CCNC(=O)c1cccc2c1nccc2)C		3.99659
Oc1ccc(cc1)CCSC(C(=O)O)Cc1ccc(cc1)CCOc1ccc(cc1)OS(=O)(=O)C	AZD-4619	3.99259
NC(=N)NCCN1CCCCCCC1	Guanethidine monosulfate	3.99171
OCC1OC(Oc2cccc3c2C(=O)c2c(C3C3c4cc(cc(c4C(=O)c4c3cccc4OC3OC(CO)C(C(C3O)O)O)O)C(=O)O)cc(cc2O)C(=O)O)C(C(C1O)O)O	SENNOSIDES	3.98906
O=c1[nH]/c(=C\c2nc[nH]c2C(C)(C)C)/c(=O)[nH]/c/1=C\c1ccccc1	plinabulin	3.98803
OC[C@H]([C@@H](c1ccc(cc1)[N+](=O)[O-])O)NC(=O)C(Cl)Cl	CHLORAMPHENICOL	3.98772
COC(=O)Nc1nc2n(c1)nc(cc2)OCc1cc(OC)c(c(c1)OC)OC	1069C	3.98274
N#Cc1cccc(c1)[C@@H]([C@@H](NC(=O)C(Oc1ccc(cn1)C(F)(F)F)(C)C)C)Cc1ccc(cc1)Cl	Taranabant	3.97985
Nc1ccc(cn1)C(=O)OCc1cccnc1	BMY-30119	3.97821
CNCCCC1c2ccccc2C=Cc2c1cccc2	Protriptyline hydrochloride	3.97761
N#Cc1ccc2c(c1)C(CC(O2)(C)C)c1cccc[n+]1[O-]	Ro 31-7837	3.9754
O=C[C@]12CC[C@@H](C[C@H]1CC[C@@H]1[C@@H]2CC[C@]2([C@]1(O)CC[C@@H]2C1=CC(=O)OC1)C)OC1OC(C)C(C(C1O)O)O		3.9743
CCN1[C@@H]2CC[C@H]1C[C@H](C2)OC(c1ccccc1)c1ccccc1	ETHYBENZTROPINE	3.97353
CCC[C@@H]1O[C@H]2C(O1)(C(=O)CO)C1([C@@H](C2)[C@@H]2C[C@H](F)C3=CC(=O)CCC3([C@]2([C@H](C1)O)F)C)C	ROFLEPONIDE	3.96794
CSc1ccc(cc1)Oc1ccc(cc1CN(C)C)S(=O)(=O)N(C)C		3.96794
OC[C@H]1O[C@H]([C@]([C@@H]1O)(C)O)n1cnc2c1nc(N)[nH]c2=O	2'-C-Methylguanosine	3.95446
CCC(c1ccccc1)(CC(=O)N)O	HEPP	3.94952
Nc1ccc(c(c1)O)C(=O)O	4-aminosalicylic acid, Block	3.94222
CC(C(=O)NC1C(=O)N2C1SC(C2C(=O)O)(C)C)Oc1ccccc1	Phenethicillin potassium	3.93817
COc1cc(COc2cc(N)c(cc2C(=O)CCC2CCN(CC2)CCNS(=O)(=O)C)Cl)cc(c1)OC		3.92715
COc1cccc(c1)c1ccc(cc1)C(=O)N1CCC(CC1)NC(=O)c1ccccc1OC		3.92276
Cc1cc(NCCN2CCN(CC2)C(c2ccccc2)c2ccccc2)c(c(n1)C)[N+](=O)[O-]	Elbanizine	3.92016
O=C(C1CCCN1Cc1cccc(c1)c1ccc(c(c1)Cl)C)NCc1ccc(cc1)C(F)(F)F		3.9144
CN[C@H](C(=O)N[C@H](C(=O)N([C@H]([C@@H](CC(=O)N1CCC[C@H]1[C@@H]([C@H](C(=O)N[C@H](c1nccs1)Cc1ccccc1)C)OC)OC)[C@H](CC)C)C)C(C)C)C(C)C	Monomethylauristatin D (MMAD)	3.91146
CO[C@@H]1CC[C@H](CC1)N1C(=O)CNc2c1nc(cn2)c1ccc(nc1)C(O)(C)C	CC-223	3.8964
ONC(=O)/C=C/c1ccn(c1)S(=O)(=O)c1ccc(cc1)CN(C)C	Resminostat (RAS2410)	3.88856
CCCN(c1ccc(cc1)/N=N/c1ccccc1C(=O)O)CCC		3.87973
C[C@]12CCCC[C@@H]1CC[C@@H]1[C@@H]2CC[C@]2([C@H]1CCC2)C	(5alpha)-androstane	3.87583
CCCCCCCCCCCCCCCC(=O)N[C@H]([C@H](/C=C/CCCCCCCCCCCCC)O)COP(=O)(OCC[N+](C)(C)C)[O-]		3.87505
FC(C(C(F)(F)F)(F)F)(C(C(C(F)(F)F)(F)F)(F)F)F	perflexane	3.87352
O=C(c1cccnc1NCc1ccncc1)Nc1ccc2c(c1)NCC2(C)C	motesanib diphosphate	3.87228
NC(=N)NC(=O)c1nc(Cl)c(nc1N)N	AMILORIDE HYDROCHLORIDE	3.87202
OC(=O)C(Cl)(Cl)Cl	TRICHLOROACETIC ACID	3.87116
CN1CCN(CC1)C1=Nc2ccccc2Nc2c1cc(s2)C	OLANZAPINE	3.87104
O=C1CCC2C(=C1)CCC1[C@@H]2CCC2([C@H]1CC[C@@H]2OC(=O)C12C[C@@H]3C[C@H](C2)C[C@H](C1)C3)C	BOLMANTALATE	3.86854
CCCCCCCCCCCCCCCCCCCCCCCCCC(=O)N[C@H]([C@@H]([C@@H](CCCCCCCCCCCCCC)O)O)CO[C@H]1O[C@H](CO)[C@@H]([C@@H]([C@H]1O)O)O	KRN7000	3.86583
CC(OC(=O)Nc1ccc2c(c1)[nH]c(n2)c1cscn1)C	Cambendazole	3.86281
CCOC(=O)c1ccc(cc1)OC(=O)CCCCCNC(=N)N	Gabexate mesilate	3.85754
[O-]C(=O)CCC(=O)OCC(C(c1ccc(cc1)[N+](=O)[O-])O)NC(=O)C(Cl)Cl	CHLORAMPHENICOL SODIUM SUCCINATE	3.84549
CC/C=C\C/C=C\C/C=C\C/C=C\C/C=C\CCCC(=O)O	DHA-metformin	3.84402
OC(c1ccccc1Cl)CNC(C)(C)C	tulobuterol (patch)	3.83206
NCC1(C)Cc2c(C1)cccc2	Org-9768	3.82627
OC[C@H]1O[C@H]([C@@H]([C@@H]1O)O)O[C@@H]1[C@@H](O[C@@H]2O[C@@H](CN)[C@@H]([C@H]([C@@H]2N)O)O)[C@H](N)C[C@@H]([C@H]1O)N	Ribostamycin Sulfate	3.82228
OCCC1CCCCN1C(=O)OC(CC)C	ICARIDIN	3.81917
CC([C@@H](C(=O)N1CCC[C@H]1B(O)O)N)C	talabostat mesylate	3.81867
O=CC[C@H]1C[C@@H](C)[C@@H](O)/C=C/C=C/C[C@H](OC(=O)C[C@H]([C@@H]([C@H]1O[C@@H]1O[C@H](C)[C@H]([C@@H]([C@H]1O)N(C)C)O[C@@H]1O[C@@H](C)[C@@H]([C@](C1)(C)O)OC(=O)CC(C)C)OC)OC(=O)C)C	Josamycin	3.81248
OC[C@H]1O[C@H]([C@H]([C@@H]1O)F)n1cc(I)c(=O)[nH]c1=O	fialuridine	3.81127
O=C(Nc1ccccc1Br)Nc1ccc(cc1O)[N+](=O)[O-]	SB 225002	3.81066
CO[C@@H]1[C@@H](O)[C@@H](O[C@H]2[C@@H](O[C@@H]([C@@H]([C@@H]2O)O)C)Oc2cccc3c2c2oc(=O)c4c5c2c(c3O)c(=O)oc5ccc4C)O[C@@H]([C@@H]1O)C		3.80139
COc1ccc(cc1N1CCNCC1)S(=O)(=O)Nc1cc(Cl)cc(c1OC)Cl	SB-399885	3.78417
CNCCOC(=O)c1cc(OC)c2c(c1c1c(cc(c3c1OCO3)OC)C(=O)O)OCO2	DDB-S	3.77562
CN([C@@H]1C(=C(C(=O)N)C(=O)[C@@]2([C@H]1[C@@H](O)[C@@H]1C(=C)c3cccc(c3C(=O)C1=C2O)O)O)O)C	METHACYCLINE HYDROCHLORIDE	3.77499
CC(NCCc1ccccc1)C		3.77435
CS(=O)CCNCc1ccc(o1)c1ccc2c(c1)c(ncn2)Nc1ccc(c(c1)Cl)OCc1cccc(c1)F	Selatinib ditosylate	3.7742
CCCCCCCCCCCCNC(=O)C[N+](Cc1ccccc1)(C)C	DODECARBONIUM CHLORIDE	3.76414
CCOC(=O)C(c1ccccc1)(C(=O)OCC)COC(=O)Cc1ccc(c(c1)C(=O)N(C)C)NC(=O)c1ccccc1c1ccc(cc1)C(F)(F)F	granotapide	3.76131
CCNC(=O)[C@@H]1CCCN1C(=O)[C@@H](NC(=O)[C@@H](NC(=O)[C@@H](C(C)(C)C)NC(=O)[C@H](Cc1ccc(cc1)O)NC(=O)[C@@H](NC(=O)[C@H](Cc1c[nH]c2c1cccc2)NC(=O)[C@H](Cc1c[nH]cn1)NC(=O)[C@@H]1CCC(=O)N1)CO)CC(C)C)CCCNC(=N)N	Lecirelin	3.75903
C#CC1(O)CCC2[C@]1(C)CCC1[C@H]2CCc2c1c(C)cc(c2)O	1-Methyl ethynyl estradiol	3.75701
Oc1ccc2c(n1)cc(cc2)OCCCCN1CCN(CC1)c1cccc2c1ccs2	brexpiprazole	3.75682
C[C@@H]1OCC[C@](C1)(O)c1csc(c1)Sc1ccc2c(c1)CC(=O)N2C	AZD-4407	3.75627
O=[S@@]1CC[C@@H](C1)SC1=C(C(=O)O)N2[C@H](S1)[C@H](C2=O)[C@H](O)C	SULOPENEM	3.75448
COc1ccc(cc1OC)C(=O)CN(C(=O)/C=C/c1cccnc1)C	TJN-598	3.75075
CCCC(C(=O)N)CCC	Valpromide	3.73975
NC(C=C)CCC(=O)O	vigabatrin	3.72587
COc1cc(ccc1c1cnco1)NC(=O)Nc1cccc(c1)CNC(=O)O[C@@H]1COCC1	Merimepodib	3.71903
[O-][N+](=O)OCC(C(=O)O)(C)C	SPM-4744	3.71399
CC(=O)Nc1cccc2c1c(=O)c1ccccc1n(c2=O)C	ADOSOPINE	3.71013
O=C(C[C@H](C(=O)O)C)C[C@H]([C@H]1C[C@@H](C2([C@]1(C)CC(=O)C1=C2[C@@H](O)C[C@@H]2[C@]1(C)CCC(=O)C2(C)C)C)O)C	Ganoderic acid A	3.70165
COc1cncnc1N1CCN(CC1)CCCc1c[nH]c2c1cc(F)cc2	BMS 181101	3.67855
OCC(=O)[C@@]1(O)CC[C@@H]2[C@]1(C)C[C@H](O)[C@H]1[C@H]2C[C@@H](C2=CC(=O)C=C[C@]12C)F	FLUPREDNISOLONE	3.66228
O[C@H]1CC[C@]2(C(=CC[C@@H]3[C@@H]2CC[C@]2([C@H]3CC=C2n2cnc3c2cccc3)C)C1)C	galeterone	3.65962
CC(NC(=O)c1cnc2n(c1)nc(c2)C)CCc1ccccc1		3.65868
Clc1cc(Cc2cc(Cl)cc(c2O)[N+](=O)[O-])c(c(c1)[N+](=O)[O-])O		3.65204
CCS(=O)(=O)N1CCN(CC1)c1ccc(cc1)Nc1ncc(c(n1)NC1CC1)C(=O)N	Cerdulatinib	3.6471
O=C(N1CCCCC1)/C=C/c1ccc2c(c1)OCO2	Ilepcimide	3.64593
COc1cc(C(C)C)c(cc1S(=O)(=O)N)Oc1cnc(nc1N)N	AF-219	3.64461
C=CC(=O)Nc1cccc(c1)Oc1nc(Nc2ccc(cc2)N2CCN(CC2)C)nc2c1scc2	Olmutinib	3.63918
NC1CCN(C1)c1c(F)cc2c(c1Cl)n(cc(c2=O)C(=O)O)C1CC1	Clinafloxacin Hydrochloride	3.6385
ON(C(c1cc2c(s1)cccc2)C)C(=O)N	ZILEUTON111406-87-2	3.63588
O=C(C1CCCN(C1)C(=O)C1CCCC1)N1CCC(CC1)N1CCCC1=O		3.63444
O=C(C(C)(C)C)NC1CCN(CC1)c1nc2c(o1)cccn2		3.63206
Fc1ccc(cc1)C(=O)CCCN1CCC(CC1)C(=O)c1ccc(cc1)F	LENPERONE	3.62519
OC(CN1CCN(CC1)c1ccc(cc1)F)COc1ccccc1C		3.62141
CCc1cc(ccc1n1nc(c2c1nccc2n1cnc(c1)c1cnn(c1)C)C(C)C)C(=O)N	TAS-116	3.61367
CC[C@@H]([C@H](N(C(=O)[C@H](C(C)C)NC(=O)[C@@H](N(C)C)C(C)C)C)[C@@H](CC(=O)N1CCC[C@H]1[C@@H]([C@H](C(=O)NCCc1ccccc1)C)OC)OC)C	soblidotin	3.6064
CCN(CCNC(=O)C(c1ccccc1)(c1ccccc1)O)CC		3.58988
BrCCC(=O)N1CCN(CC1)C(=O)CCBr	Pipobroman	3.5841
OC(=O)CCc1ccc(o1)c1ccc(cc1)Cl		3.57527
Cc1ccc2c(n1)c(OC(=O)c1ccco1)c(cc2Br)Br		3.55983
c1ccc2c(c1)[nH]cc2c1[nH]c2c(n1)cncc2		3.55829
C[C@H](c1ccccc1)NC(=O)[C@H](N1C(=O)[C@H]([C@H]1/C=C/c1ccccc1)N1C(=O)OC[C@@H]1c1ccccc1)CC(=O)N1CCC(CC1)N1CCCCC1	SRX-246	3.55674
Oc1ccc2c(c1)CC[C@@H]1[C@@H]2CC[C@]2([C@H]1CC[C@H]2O)C	alpha-estradiol	3.55408
Cc1ncc(nc1)C(=O)NCCc1ccc(cc1)S(=O)(=O)NC(=O)NC1CCCCC1		3.54908
CO[C@@H]([C@@H]1Cc2cc3cc(O[C@@H]4O[C@H](C)[C@@H]([C@@H](C4)O[C@H]4C[C@@H](O)[C@@H]([C@H](O4)C)O)O)c(c(c3c(c2C(=O)[C@H]1O[C@@H]1O[C@H](C)[C@H]([C@@H](C1)O[C@@H]1O[C@H](C)[C@H]([C@@H](C1)O[C@@H]1O[C@H](C)[C@H]([C@@](C1)(C)O)O)O)O)O)O)C)C(=O)[C@H]([C@H](O)C)O	Mithramycin A	3.54445
O=C([C@@H](c1ccccc1)N)N[C@@H]1C(=O)N2[C@@H]1SC([C@@H]2C(=O)OCOC(=O)[C@@H]1N2C(=O)C[C@H]2S(=O)(=O)C1(C)C)(C)C	sultamicillin	3.54379
Clc1cccc(c1c1noc(c1COC1CCN(CC1)c1ccc2c(c1)n(C)cc2C(=O)O)C1CC1)Cl	LY-2562175	3.54088
NCCNC(C(=O)O)Cc1c[nH]cn1	UK-370587	3.54077
NC(=N)NC(=O)c1ccc2c(c1)cccc2c1cnn(c1)C	BIT-225	3.53753
CCn1c(/N=N/N(C)C)nc2c1c(=O)n(c(=O)n2C)C	etheophazine	3.53518
CCCCCCOC(=O)c1cccnc1	HEXYL NICOTINATE	3.5319
O=C(c1ccc(cc1)F)CCCN1CC2CCC(C1)CC2	nonaperone	3.52682
OC(COc1ccc(cc1C(=O)C)NC(=O)C)CNC(C)C	Diacetolol hydrochloride	3.52441
CN(CCN1CCN(C1=O)c1cccc(c1)Cl)C	IMIDOLINE	3.51886
NC(C(=O)O)CS	cysteine, Bio3	3.51739
CC(CC(c1ccc(cc1)OCCOCC[N+](Cc1ccccc1)(C)C)(C)C)(C)C	Americaine	3.51225
C#CCOc1ccc2c(c1)c(nc(=O)n2Cc1ccc(cc1)Br)c1ccc(cc1)C(C)C	AXT-914	3.48978
Oc1ccc(cc1)Cl	PARACHLOROPHENOL	3.48749
C1NCc2c3N(C1)C[C@@H]1CCC[C@@H]1c3ccc2	vabicaserin	3.48259
COc1ccc(cc1)CC(=O)N1CCCC2(C1)Cc1ccccc1CN2C(=O)C1CCCC1		3.47611
CC(CC(C1(CCC1)c1ccc(cc1)Cl)N(C)C)C	Sibutramine hydrochloride	3.47228
COc1cc(ccc1OC)N1CCN(CC1)C(=O)CC(c1ccccc1)OC(=O)N	SKL-11197	3.46996
COc1nc(N)nc2c1nc[nH]2	O-6-METHYLGUANINE	3.46741
O=S(=O)(c1cccc2c1ccnc2)N1CCNCCC1	fasudil ER	3.46463
ONC(=O)[C@H]([C@H](C(=O)N[C@@H](C(C)(C)C)C(=O)NC)CC(C)C)O	Marimastat	3.46162
Cc1ccc2c(c1)[C@@]13CCCC[C@@H]3[C@H](C2)N(CC1)C	Dimemorfan phosphate	3.46133
O[C@H](CN1CCOCC1)CNC(=O)c1c(C)[nH]c(c1C)/C=C/1\C(=O)Nc2c1cc(F)cc2	SU-14813	3.45483
COc1cc(cc(c1C(=O)NC(C(N1CCCC1)(C)C)c1ccccc1)C(F)(F)F)C(F)(F)F	GSK-1018921	3.45478
CCOc1ccc2c(c1)sc(n2)SC(c1ccccc1)(C(=O)O)C	tazasubrate	3.45214
COc1ccc(c(c1)O)C(=O)c1ccccc1	Oxybenzone	3.45142
CCCCc1nc2c(n1Cc1ccc(cc1)c1ccccc1c1nnn[nH]1)c(=O)n(cc2)CC(=O)N(C)C	EMD-66684	3.44665
[O-][N+](=O)O[C@H]1CO[C@H]2[C@@H]1OC[C@@H]2NCCCn1cnc2c1c(=O)n(C)c(=O)n2C	teopranitol	3.44604
CCCCCCCCN=c1ccn(cc1)CCCCCCCCCCn1ccc(=NCCCCCCCC)cc1	octenidine	3.43103
OC(=O)Cc1csc(n1)NC(=O)c1cn(c2c1cccc2)Cc1ccccc1	TTP-399	3.4282
CCCCc1cc(OC)c2c(c1OC(=O)C)cccc2	Bunaprolast	3.42381
C#CCN([C@H](c1ccc(c(c1)F)C)CC1CC1)c1sc(c(n1)c1cc(C)c(cc1Cl)OC)C	SSR-125543	3.42314
Fc1ccc(c(c1)F)C(C(c1ccc(cn1)c1ccc(cc1)OC(F)(F)F)(F)F)(Cn1cnnn1)O	VT-1129	3.40738
COc1ccc2c(c1)Oc1ccc(cc1N=C2C)C(=O)O		3.40308
CCNC1(CCN(CC1)c1ncnc2c1nc(n2c1ccc(cc1)Cl)c1ccccc1Cl)C(=O)N	Otenabant hydrochloride	3.39937
COc1ccc(c2c1nccc2)C(=O)Nc1cc(Cl)cnc1Cl	D 4418	3.39266
O=C(N1CCOCC1)CCc1sc2c(c1)C(=NCc1n2c(C)nn1)c1ccccc1Cl	APAFANT	3.39185
OC(=O)CN(CC(=O)Nc1c(C)cc(c(c1C)Br)C)CC(=O)O	Mebrofenin	3.38944
Clc1cc2NCNS(=O)(=O)c2cc1S(=O)(=O)N		3.3793
Fc1ccc(cc1)Cc1ccc(s1)C#CC(N(C(=O)N)O)C	VIA-2291	3.37237
CC/C(=C\C(=N/O)\C(=O)N)/C([N+](=O)[O-])C	FK-409	3.37121
Fc1ccc(c2c1CCC2)OC[C@@H]1CNCCO1	LUBAZODONE	3.3664
CC(S(=O)(=O)N[C@@H]1CC[C@H](CC1)CNc1scc(n1)c1ccccn1)C	LU-AA44608	3.36298
O=C(c1ccc(cc1)Cl)N1CCC(CC1)N1CCCC1		3.35946
CN(CCCn1c(=O)c2ccccc2c2c1cccc2)C	FANTRIDONE	3.3594
Cc1cc(Cl)c(c(c1)Cl)OCCOc1ccc(cc1)C1=C(C2NC(C1)CNC2)C(=O)N(C1CC1)Cc1cccc(c1C)C	MK-8141	3.35503
COCCOC(=O)C1=C(C)NC(=C(C1c1ccc(o1)C)C(=O)OCCOC)C		3.33981
CC(=O)N(C1CCc2c1cccc2)C		3.32587
CC1N(CC=C)C=CC(=O)C1=O	L1NAll	3.32474
CCCCCN(C(=O)C(CS(=O)(=O)c1ccc2c(c1)cccc2)CCC(=O)O)CCCOC	KSG-504	3.32235
O=C1CN=C(c2c(N1)cn(c2C)C)c1ccccc1	premazepam	3.32227
OC(C[N+](C(C)C)(C)C)COc1cccc2c1cccc2	PRANOLIUM CHLORIDE	3.3184
Fc1ccccc1CN(C1CCc2c1cccc2)C		3.31736
Clc1ccc(cc1)N/C=C(\c1onc(c1)C)/C(=O)Nc1ccc(cc1)Cl	XY-4083	3.31562
O=C(C(C)C)OC1=C(C(=O)Nc2noc(c2)C)N(C)S(=O)(=O)c2c1cccc2		3.31184
OCC(CCc1ccc(cc1Cl)Sc1cccc(c1)OCc1ccccc1)(CO)N	KRP-203	3.30323
N#CC1=C(N)Oc2c(C1c1cccc(c1)F)ccc(c2)O		3.29843
CCOc1ccc(cn1)NC(=O)c1cccc2c1OC[C@@H](N2c1ccc(cn1)C)CO		3.29626
Fc1cccc(c1)n1ncc2c1CC(C)(C)CC2NC(=O)c1[nH]nc(c1)C(=O)C		3.29542
Oc1ccc(cc1)CC1C(=O)N(Cc2ccc3c(c2)cccc3)CC2N1C(=O)CCN2C(=O)NCc1ccccc1	CWP-232291	3.28041
CCCN([C@@H]1CCc2c([C@@H]1C)cccc2OC)CCC	(+)-UH 232 MALEATE	3.27563
O=C(c1cc(Cl)c(c2c1OCC2)N)NC[C@@H]1CCCN1	ADR 851	3.26678
COc1ccc(cc1)C[C@H](N(S(=O)(=O)Cc1ccccc1)C)C(=O)N[C@H](c1cccc2c1cccc2)C	DNP-004089	3.26578
CSc1nc(=O)c2c([nH]1)c(c[nH]2)Cc1cccnc1		3.2625
OC(=O)C1(CCCCC1)CCN1CC[C@H]2[C@H](C1)[C@@H](C)c1c(C2)[nH]c2c1cc(cc2)C(F)(F)F	T-71	3.2603
COC(=O)N1CCC(CC1)CC#Cc1nc(N)c2c(n1)n(cn2)[C@@H]1O[C@@H]([C@H]([C@H]1O)O)C(=O)NC1CC1	ATL-313	3.25804
COc1cccc(c1)c1ccc(cc1)CN1CCCC1C(=O)NCc1ccc2c(c1)OCO2		3.25549
CN(CCSC(=O)N1c2ccccc2C(c2c1cccc2)(C)C)C	botiacrine	3.24703
COc1cc2N(C)[C@@H]3[C@@]4(c2cc1[C@]1(C[C@@H]2CN(CCc5c1[nH]c1c5cccc1)C[C@](C2)(O)CC)C(=O)OC)CCN1[C@H]4[C@@]([C@H]([C@]3(O)C(=O)N)O)(CC)C=CC1	VINDESINE SULFATE	3.24685
CCOC(=O)c1cnc2c(c1NN=C(C)C)cnn2CC	Etazolate	3.24445
CC/C(=C(\c1ccc(cc1)I)/c1ccc(cc1)OCCN1CCCC1)/c1ccccc1	Idoxifene	3.24136
CCCC=c1[nH]n(c(=O)n1Cc1ccc(cc1)c1ccccc1S(=O)(=O)NC(=O)c1sccc1C)c1ccccc1C(F)(F)F		3.24064
COc1cccc(c1)c1ccc(cc1)C(=O)NCCNC(=O)c1ccccn1		3.23904
NCCCN(C(c1oc2cc(Cl)ccc2c(=O)c1Cc1ccccc1)C(C)C)C(=O)c1ccc(cc1)C	SB-743921	3.23193
O=C(/C=C\n1cnc(n1)c1cc(cc(c1)C(F)(F)F)C(F)(F)F)NNc1ccccn1	Verdinexor	3.21874
OC[C@H]1O[C@@H]([C@@H]([C@@H]1OP(=O)(O[C@@H](CNC(=O)CC[C@@]1(C)C2=N[C@H]([C@@H]1CC(=O)N)[C@]1(C)N([Co+]C#N)/C(=C(/C)\C3=N/C(=C\C4=N/C(=C\2/C)/[C@@H](CCC(=O)N)C4(C)C)/[C@H]([C@]3(C)CC(=O)N)CCC(=O)N)/[C@H]([C@]1(C)CC(=O)N)CCC(=O)N)C)[O-])O)n1cnc2c1cc(C)c(c2)C	Cyanocobalamin	3.21599
CC(=CCOc1cc(ccc1Cl)NC(=O)c1ccncc1)C		3.21181
O=C1NCc2c(CC31CCCCN3Cc1ccccc1)cccc2		3.21167
CCN(CC#CCOC(=O)C(c1ccccc1)(C1CCCCC1)O)CC		3.21106
O=C(N[C@H](C(=O)O)CC(=O)NCC(=O)O)CC[C@@H](C(=O)O)NC(=O)[C@@H](N)C	Epithalon	3.2097
NC(=S)N/N=C\1/c2ccccc2N(C1=O)C	METISAZONE	3.2049
FCC[N+]1(C)C2CCC1CC(C2)OC(=O)C(c1ccccc1)(c1ccccc1)O	FLUTROPIUM BROMIDE	3.19546
N[C@H]1CC[C@@H](c2c1cccc2)c1ccc(c(c1)Cl)Cl	Dasotraline	3.19358
FC(c1cccc(c1)C1=CCN(CC1)CCc1ccc(cc1)c1ccccc1)(F)F	PALIRODEN	3.18658
CCOC(=O)[C@@H](NC(=O)C1(CCCC1)NC(=O)[C@H](C(C)C)SC(=O)C)Cc1ccc(cc1)OC	CGS-30440	3.18194
Cc1cnc(nc1)CNCC1(F)CCN(CC1)C(=O)c1ccc(c(c1)Cl)F	[18F]-F-15599	3.1813
CCOC(=O)CC(c1cccc2c1[nH]c(n2)CCc1ccccc1)O	M 50367	3.18101
c1ccc2c(c1)[nH]c(n2)c1nc2c([nH]1)cccc2	NSC 67061	3.17401
COC(c1ccccc1)(c1ccccc1)C(=O)OC(CN(C)C)C		3.17359
O=C(C(C)(C)C)NCCCC(=O)O	pivagabine	3.17348
Cc1nn2c(c1)ncc(c2)C(=O)N1CCC(CC1)N1CCCC1		3.17309
Fc1ccc(c(c1)NC1=NCCN1)C	flutonidine	3.17075
CC(Oc1ccc2c(c1)occ(c2=O)c1ccccc1)C		3.17022
CCC([C@@H](C(=O)O)NC(=O)c1ccccc1SSc1ccccc1C(=O)N[C@@H](C(CC)C)C(=O)O)C	PD-159206	3.16861
CC[C@]1(C)C[C@@H](OC(=O)CSc2nnc([nH]2)N)[C@]2(C)[C@H](C)CC[C@]3([C@H]([C@@H]1O)C)[C@H]2C(=O)CC3	azamulin	3.16778
OC[C@H]1O[C@@H](S[C@@H]2O[C@H](CO)[C@@H]([C@@H]([C@H]2O)n2nnc(c2)c2cccc(c2)F)O)[C@@H]([C@H]([C@H]1O)n1nnc(c1)c1cccc(c1)F)O		3.15327
[O-]C(=O)CN(CC(=O)[O-])CCN(CC(=O)[O-])CC(=O)[O-]	Edetate calcium disodium	3.14785
Cc1ccc2c(n1)c(O)c(cc2Br)Br	BROXALDINE metabolite	3.14093
O=C(c1ccccc1)NC1CCN(CC1)Cc1cccc(c1)c1ccc(c(c1)F)F		3.136
O=C(NCC(F)(F)F)CNC(=O)c1ccc(cc1C)C1=NOC(C1)(c1cc(Cl)cc(c1)Cl)C(F)(F)F	Fluralaner	3.13563
CCCn1nc(ccc1=O)c1ccccc1		3.12875
CC[C@@H]([C@@H](C(=O)n1nc(c2c1nc1ccc(cc1c2Cl)OC)C)N)C	SCH 49286	3.12787
CCCCCCCCCCCCCCCCOC[C@H](COP(=O)(OCC[N+](C)(C)C)[O-])OCCCCC(=O)O	CI-201	3.12502
Brc1ccc(c(c1)NS(=O)(=O)c1cccc2c1nccn2)C(=O)N[C@@H](c1ccc(cc1F)F)C	JNJ-26070109	3.11751
Fc1ccc(c(c1)F)C([C@@H](S(=O)(=O)C)C)(Cn1cncn1)O	genaconazole	3.11221
Nc1nc(=O)c2c([nH]1)n(CCC(CO)O)cn2	buciclovir	3.1109
N#Cc1ccc(cc1)C(=O)N(c1ccccn1)C[C@H](N1CCN(CC1)c1cccc2c1OCCO2)C	lecozotan hydrochloride	3.10944
CN(Cc1cccc2c1cccc2)Cc1ccc(cc1)C(C)(C)C	Butenafine	3.10929
O=C1NCc2c(CC31CCCCN3CC1CCC=CC1)cccc2		3.10839
OCC1CNCC(C1O)O	NN-4201	3.10357
O=C(N[C@@H](CC(=O)O)CCc1c[nH]c2c1cccc2)CNC(=O)CCCC1CCNCC1	L 703014	3.10023
OCCc1c(=O)[nH]c2c(c1c1cc(Cl)ccc1O)cc(cc2)C(F)(F)F	BMS-223131	3.09494
O=C(Cc1ccccc1)Nc1ccc2c(c1)n(CCN1CCCC1)nc2		3.0936
O=C(/C=C/c1ccc(nc1)C)NCCCCN1CCN(CC1)C(c1ccccc1)c1ccccc1	TAGORIZINE	3.09229
CC[C@@H](C(=O)C(=O)NC1CC1)NC(=O)[C@H](CS(=O)(=O)CC1CC1)N[C@H](C(F)(F)F)c1ccc(cc1)F	VBY-825	3.07181
COc1cccc(c1OC)[C@H]1O[C@H](CC(=O)N2CCC(CC2)CC(=O)O)C(=O)N(c2c1cc(Cl)cc2)CC(CO)(C)C		3.06862
COc1cccc(c1)C(=O)N1CC2(C1)Cc1ccccc1N(C2)C(=O)C		3.06688
Fc1ccccc1CN1CCCCC21Cc1ccccc1CNC2=O		3.05997
OC[C@H]1O[C@@H](Oc2c3cc4cc2Oc2ccc(cc2Cl)[C@@H](O)[C@@H]2NC(=O)[C@H](NC(=O)[C@@H]4NC(=O)[C@H](CC(=O)N)NC(=O)[C@@H]([C@@H](c4ccc(O3)c(Cl)c4)O)NC(=O)[C@@H](CC(C)C)NC)c3ccc(c(c3)c3c(O)cc(cc3[C@H](NC2=O)C(=O)O)O)O)[C@@H]([C@H]([C@@H]1O)O)O[C@@H]1O[C@@H](C)[C@H]([C@@](C1)(C)N)O	Vancomycin	3.05947
COc1cc(CN2CCN(CC2)CC(=O)O)cc(c1OC)OC		3.05746
Fc1ccc(cc1)C(=O)CCCN1CCN(CC1)c1ncc2c(c1)cccc2	cinuperone	3.052
CN/C(=N\S(=O)(=O)N1CCCCC1)/N1C[C@@H](C(=N1)c1ccc(cc1)Cl)c1ccccc1	SLV-330	3.04964
CCc1nc2c(n1Cc1ccc(cc1)[C@H]([C@H](C(=O)O)C)c1ccccc1)nc(cc2C)C	UR 7198	3.04368
CC(=O)Nc1ccc(cc1)C(=O)OCCOc1ccccc1C		3.04015
CC(CC(=O)Nc1cncc(c1)c1ccc2c(c1)c(n[nH]2)c1nc2c([nH]1)cncc2c1cccc(c1)F)C	SM04646	3.03071
Clc1cccc(c1)Nc1ncc(c(n1)C(F)(F)F)C(=O)NCc1ccccc1		3.02978
OC(=O)Cc1ccc(cc1)c1ccccc1	felbinac	3.02473
COc1cc(/C=C/C(=O)OCCCCO[N+](=O)[O-])ccc1OC(=O)CC[C@H]([C@H]1CC[C@@H]2[C@]1(C)CC[C@H]1[C@H]2[C@@H](O)C[C@H]2[C@]1(C)CC[C@H](C2)O)C	NCX 1000	3.02275
CC(N(C[C@@H](c1ccccc1)O)C[C@@H](c1ccccc1)O)CCc1ccc(cc1)C(=O)N	RO 168714	3.02191
OC(=O)c1cn(c2ccc3c(c2)oc(=O)n3C)c(=O)n(c1=O)[C@@H]1CCc2c1cccc2C(F)(F)F	BAY-1142524	3.02119
C=CCNC1=C2C[C@@H](C)C[C@H](OC)[C@H](O)[C@@H](C)/C=C(\C)/[C@@H]([C@H](/C=C\C=C(\C(=O)NC(=CC1=O)C2=O)/C)OC)OC(=O)N	17-AAG (Tanespimycin)	3.01508
O=C(N1CCC(CC1)N1Cc2c(C1=O)cccc2)C1CCN(CC1)C(=O)C1CCCC1		3.01269
O=C1N(CCc2c1c1ccccc1n2C)Cc1[nH]cnc1C	Alosetron HCl	3.00658
CC(c1ccccc1c1ccc2c(c1)nc([nH]2)/C=C/c1ccc(cc1)C(F)(F)F)(O)C	Mavatrep	3.0052
O=C(c1ccc(cc1)CNc1nccc(n1)c1cccnc1)Nc1ccccc1N	Mocetinostat (MGCD0103)	3.00462
CCCN1CCC2(Oc3c1cccc3)CCN(CC2)C(=O)C		3.00338
CCOC(=O)NNc1ccc(nn1)N(CC(O)C)CC	cadralazine	3.00046
O=C(c1ccc2c(c1)cccc2)Cn1cncc1	nafimidone	2.99065
O=C(N([C@H]1CC[C@]2(C[C@@H]1N1CCCC1)CCCO2)C)Cc1cccc2c1cco2	Enadoline	2.98932
COc1cc(ccc1Nc1ncc(c(n1)Nc1ccccc1P(=O)(C)C)Cl)N1CCC(CC1)N(C)C	AP26113-analog	2.98059
Cc1ccc(cc1)S(=O)(=O)N1CCCC(C1)C(=O)N1CCC(CC1)N1CCCC1=O		2.97824
COc1cccc(c1)OCC1CNCCO1	ICI-60052	2.97707
C[C@H](Cc1ccc2c(c1)OC(O2)(C(=O)O)C(=O)O)NC[C@@H](c1cccc(c1)Cl)O	BTA-243	2.97423
C=CCCCCCCCCC(=O)O[C@H]1CC[C@@H]2[C@]1(C)CC[C@H]1[C@H]2CCC2=CC(=O)C=C[C@]12C	Bolde Undecylenate	2.97112
COCCCOc1ccnc(c1C)CS(=O)c1nc2c([nH]1)cccc2	RABEPRAZOLE117976-89-3	2.96453
O=C(N[C@H](C(=O)N[C@H](C(=O)O)Cc1ccccc1)CC(=O)O)CCCCc1cccc(c1)C(=N)N	analog of SC 52012	2.96337
OC[C@@H]1O[C@@H](C(C1O)O)n1cnc2c1nc(OCCc1ccc(cc1)Cl)nc2N	sonedenoson	2.96324
O=C(C[N+]12CCC(CC1)C(C2)OC(=O)C1(CCCCCC1)c1ccccc1)Nc1ccccn1	AZD-8683	2.95614
C=CCSCC1Nc2cc(Cl)c(cc2S(=O)(=O)N1)S(=O)(=O)N	ALTHIAZIDE	2.95564
Clc1ccc(c(c1)C(=O)Nc1ccc(cc1Cl)[N+](=O)[O-])O	Niclosamide	2.95481
C=C=CCNCCCCNCC=C=C	MDL-72527	2.95262
OCCN1CCN(CC1)C(=O)Cn1c(=O)sc2c1cc(Cl)cc2	tiaramide	2.95162
CO/N=C(\c1csc(n1)N)/C(=O)NC1C(=O)N2C1SCC(=C2C(=O)O)COC(=O)C	cefotaxime salt	2.94534
NC(=N)NCCC[C@H](C(=O)N[C@@H](C(=O)N[C@@H](C(=O)N[C@@H](C(=O)N)CCCNC(=N)N)C)CCCNC(=N)N)NC(=O)[C@H](NC(=O)[C@H](NC(=O)[C@H](NC(=O)C)CSSC[C@@H](C(=O)O)N)C)CCCNC(=N)N		2.93901
CNCCN1CCN(C1=O)c1cccc(c1)Cl		2.93526
COP(=O)(OC=C(Cl)Cl)OC	DICHLORVOS	2.93028
O[C@@H]1[C@@H](O)CN2[C@@H]([C@H]1O)[C@@H](O)CC2	CASTANOSPERMINE	2.92942
CCN1CCC(CC1)Nc1ccc2c(c1)/C(=C(\c1[nH]cc(n1)C)/c1cccc(c1)F)/C(=O)N2	XL-999	2.92618
O=C(NC(=O)c1cc(F)c(cc1Cl)F)Nc1ccc(cc1OC(F)(F)F)C(=O)O	AVE-5688	2.92581
CCCCCC(c1ccc(cc1)N1[C@@H](COCc2ccc(s2)C(=O)OC(C)C)CCC1=O)O	simenepag isopropyl	2.91939
NC[C@@H](NC(=O)c1sc(c(c1)c1c(Cl)cnn1C)Cl)Cc1cccc(c1)F	Afuresertib	2.91626
C1CCC(CC1)c1ccc2c(c1)c1CCCC3c1n2CCN3	Tetrindole	2.91288
O=C1Nc2ccccc2CC21CN(C2)CC1CCCC1		2.91024
COc1cc(sc1c1nc2c([nH]1)cncc2)S(=O)C	Vasotrope	2.90577
O=C(N1CCC(CC1)c1cnc[nH]1)CCCCC1CCCCC1	GT 2016	2.90556
N[C@H]1CCCC[C@H]1Nc1ncc(c(n1)Nc1cccc(c1)n1nccn1)C(=O)N	PRT-062607	2.90415
CC(=O)CC(c1c(=O)oc2c(c1O)cccc2)(C)C		2.90178
CCCCCCN1CCCC21Cc1ccccc1CNC2=O		2.90013
O=C(Nc1ccc(cc1C(=O)c1ccccc1)Cl)CN(CC(=O)O)CC(=O)O	ARCLOFENIN	2.89931
CCC(=O)NC[C@@H]1C[C@H]1c1cccc2c1CCO2	Tasimelteon	2.8987
NCCCC[C@@H](C(=O)N1CCN(CC1)c1ccncc1)NC(=O)[C@H](NC(=O)N1CCC(CC1)N1Cc2ccccc2NC1=O)Cc1cc(Br)c(c(c1)Br)O	olcegepant	2.89492
NC1CCN(C1)c1nc2n(cc(c(=O)c2cc1F)C(=O)O)c1ccc(cc1F)F	tosufloxacin tosilate	2.89473
CN(S(=O)(=O)c1ccc2c(c1)N(C1CN3CCC1CC3)c1c(S2)cccc1)C	quisultazine	2.89414
COc1cc(/C=C/c2ccc(cc2)O)cc(c1)OC	Pterostilbene	2.89038
CNC1=[O][Gd-3]234567[N+](C1)(CC[N+]6(CC[N+]7(CC(=O)O4)CC(=[O]5)NC)CC(=O)O2)CC(=O)O3	Gadodiamide	2.87973
C=CCN1CC[C@@]23C([C@H]1Cc1c3cc(cc1)O)CCCC2	LEVALLORPHAN	2.87777
COc1cccc(c1OC)C(C1CCN(CC1)CCc1ccc(cc1)F)O	Volinanserin	2.87592
OC(CN(C)C)CN(C)C		2.87427
O[C@@H]1CS[C@H]([C@@H]([C@H]1O)O)Oc1ccc2c(c1)oc(=O)cc2C	Odiparcil	2.87192
O=C([C@@H]1CC[C@@H]2CN1C(=O)N2OS(=O)(=O)O)NNC(=O)[C@@H]1CCCNC1	Zidebactam	2.86929
CC(OC(=O)CNc1cccc(n1)CN(S(=O)(=O)c1cccnc1)Cc1ccc(cc1)n1cccn1)C	DE-117	2.86867
CN(CCc1cc2c([nH]1)cccc2)C	DIMETHYLTRYPTAMINE	2.86849
CNC(=O)C	N-methylacetamide	2.86652
CCC(=O)O[C@@]1(CC[C@@H]2[C@]1(C)C[C@H](O)[C@H]1[C@H]2CCC2=CC(=O)CC[C@]12C)C(=O)COC(=O)C	Hydrocortisone aceponate	2.8656
CC(C(=O)NCC(=O)OCc1cccc(n1)COC(=O)CNC(=O)C(SC(=O)c1ccccc1)C)SC(=O)c1ccccc1	dibenzothioline	2.86543
O=C(c1sc2c(c1O)cc(cc2)C(F)(F)F)N/C=C(\c1cccs1)/c1ccccc1	L-652343	2.86323
CCCC(=O)N(Cc1c(nc2n1cccc2)c1ccc(cc1)Cl)C	Saripidem	2.85893
Cl[Ru-2](Cl)(Cl)(Cl)(Cl)Cl		2.85771
ONC(=O)CCCC/C=C(/C(=O)NCCCN(C)C)\COc1cccc2c1cccc2	CG-200745	2.85569
OC[C@H]1O[C@H](O[C@H]2[C@H](N)C[C@@H]([C@H]([C@@H]2O)O[C@H]2O[C@H](CN)[C@H]([C@@H]([C@H]2O)O)O)N)[C@@H]([C@H]([C@@H]1O)N)O	Kanamycin	2.85135
NC[C@H]1O[C@H](O[C@@H]2[C@@H](N)C[C@H]([C@@H]([C@H]2O)O[C@H]2O[C@H](CO)[C@H]([C@@H]([C@H]2O)N)O)N)[C@@H](C[C@@H]1O)N	Tobramycin	2.85032
CCOC(=O)N1CCN(CC1)c1ncnc2c1cc(OC)c(c2)OC		2.84869
C[N+](=C1C=CC(=C(c2ccc(cc2)N(C)C)c2ccc(cc2)N(C)C)C=C1)C	GENTIAN VIOLET	2.84806
COC(=O)C1=C(C)NC(=C(C1c1cccc(c1)[N+](=O)[O-])C(=O)OCCN1CCN(CC1)C(c1ccccc1)c1ccccc1)C	Manidipine (Manyper)	2.83669
OCc1cc(ccc1O)C(CNC(C)(C)C)O	SALBUTAMOL SULFATE	2.83578
COC(=O)N[C@H](C(=O)N1CCC[C@H]1c1[nH]cc(n1)c1ccc2c(c1)O[C@H](n1c2cc2c1ccc(c2)c1c[nH]c(n1)[C@@H]1CCCN1C(=O)[C@H](C(C)C)NC(=O)OC)c1ccccc1)C(C)C	Elbasvir	2.83346
COc1cccc2c1N(CCC2)C(=O)c1ccc(nc1)OC(C)C		2.81842
COc1ccc(cc1NC(=O)CCN1CC(C1)N1CCCCC1C)C		2.81361
CN[C@@H]([C@@H](c1ccc(c(c1)O)O)O)C(=O)OC	AZ-002	2.81353
CCCCc1ccc2c(c1)nc([nH]2)NC(=O)OC	PARBENDAZOLE	2.81171
O=C(N1CC(=O)N2C(C1)c1ccccc1CC2)C1CCCCC1		2.81001
COc1ccccc1C(=C(c1ccccc1)c1ccccc1)C(=O)O	ANISACRIL	2.80965
CCC[C@@H]1CC2=CC(=O)CC[C@@]2([C@@H]2[C@@H]1[C@@H]1CC[C@@]([C@]1(CC2)C)(O)CCC(=O)[O-])C	oxprenoate potassium	2.80947
Fc1ccc2c(c1)n(C)cc(c2=O)S(=O)C	flosequinan	2.80751
CCN1CCCC1CNC(=O)c1cc(c(cc1OC)N)S(=O)(=O)CC	Amisulpride	2.80253
COc1ccc(cc1)C(c1ccccc1)OCCN1CCN(CC1)CCCC(=O)c1ccc(cc1)F	mobenzoxamine	2.79921
OC(=O)CCC(=O)OCC(=O)[C@@]1(O)CCC2C1(C)CC(O)C1C2CCC2=CC(=O)C=CC12C	Prednisolone Sodium Succinate	2.79898
CCC(=O)N1Cc2ccccc2CC2(C1)CCCCN2C		2.79012
COc1cc(Cc2cnc(nc2N)N)c2c(c1OC)OC(C=C2)C1CC1	Iclaprim	2.78184
CC[C@@H]1C(=O)SC[C@@H]1Cc1cncn1C	THIOPILOCARPINE	2.77948
OC(=O)[C@@H](NC(=O)c1c(Cl)cc2c(c1Cl)CCN(C2)C(=O)c1ccc2c(c1)occ2)Cc1cccc(c1)S(=O)(=O)C	lifitegrast	2.77852
COC(=O)c1ccccc1c1c2ccc(cc2[o+]c2c1ccc(c2)N)N	Rhodamine 123	2.7723
CO[C@@H]1/C=C\C=C(\C)/Cc2cc(OC)c(c(c2)N(C(=O)C[C@@H]([C@]2([C@H]([C@@H]([C@@H]3C[C@@]1(O)NC(=O)O3)C)O2)C)OC(=O)[C@@H](N(C(=O)C)C)C)C)Cl	MAYTANSINE	2.77103
OC[C@H]1O[C@H]([C@H]([C@@H]1O)F)n1cc(I)c(nc1=O)N	FIAC, Pharmos	2.76906
NC(=O)N/N=C/1\C=C2CC(N(C2=CC1=O)C)S(=O)(=O)O	Carbazochrome sodium sulfonate	2.76449
CC(NC(=O)NC1CC2(CCN(CC2)Cc2ccc(cc2)O)Oc2c1cccc2)C		2.76266
O=C1NCCN1C1CCN(CC1)C(=O)c1ccc2c(c1)OCO2		2.7619
CCCCNc1ccc(c(c1)O)C(=O)OCC[NH+](CC)CC		2.75032
CC(=O)N[C@H]1CSSC(C)(C)[C@H](NC(=O)[C@H](NC(=O)CNC(=O)[C@@H](N(C1=O)C)CCCNC(=N)N)CC(=O)O)C(=O)N	SKF 106760	2.74365
Oc1ccc2c(c1)[C@]13CCCC[C@]3([C@@H](C2)N(CC1)CC1CCC1)O	Butorphanol-(+)-Tartrate (Schedule Iv)	2.74151
O=C(c1ccc(cc1)CN1CCOCC1)N1CCN(CC1)C1CC1	Bavisant	2.74091
CC(OC(=O)N1CCC(CC1)Oc1ncnc2c1cnn2c1ccc(cc1F)S(=O)(=O)C)C	APD-668	2.73866
COc1ccc2c(c1)CCN=C2Cc1ccc(c(c1)OC)OC		2.73363
Cc1ccc(cc1)C(=O)NC1CCN(CC1)Cc1cccc(c1)c1ccc(c(c1)F)F		2.7333
COc1cc(ccc1S(=O)c1ccccc1)c1cnn2c1ncnc2O	BOF-4272	2.7293
O[C@@H]1[C@H](O[C@@H]([C@H]([C@@H]1O)O)CCP(=O)(O)O)Oc1ccc(cc1C)C	PXS-64	2.72671
CCCCC1OC(=O)c2c1cccc2	butylphthalide, CSPC	2.7258
CCCOc1ccc(cc1)C1CNC(=O)N1c1ccc2c(c1)ncn2	PQ-912	2.72166
CN/C/1=N/N=C(\C)/C(=N/N=C(\S[Cu]S1)/NC)/C	Cu(II)-ATSM	2.71476
O=C(N1CCC2=NN(C(=O)C2(C1)Cc1ccccc1)C)[C@H](NC(=O)C(N)(C)C)COCc1ccccc1	CAPROMORELIN	2.70256
CC(NCC(c1ccc2c(c1)cccc2)O)C	PRONETHALOL	2.70188
CCCCCCCCCCCCCCCC(=O)NCCO	N-palmitoylethanolamide, Stief	2.70103
CCCCCCCCCCCC(=O)c1ccc(cc1)OCC[N+](Cc1ccccc1)(C)C	LAURALKONIUM CHLORIDE	2.70066
CC[N+](=C1C=C/C(=C(\c2cc(ccc2S(=O)(=O)[O-])S(=O)(=O)O)/c2ccc(cc2)N(CC)CC)/C=C1)CC	ISOSULFAN BLUE	2.69553
COC(c1ccccc1)CN1CCN(CC1)CCC(c1ccccc1)O	EPROZINOL	2.6944
O=c1nc(C)[nH]c2c1CSCC2	DR-2313	2.69259
Oc1ccc(cc1)[C@@H]1CC[C@@]2(CC1)OOC1(O2)C2CC3CC1CC(C2)C3		2.69073
OCCC(C(=O)[O-])O/N=C/1\C(=O)Nc2c1cc(c1ccc(cc1)S(=O)(=O)N(C)C)c1c2CN(CC1)C	NS 1209	2.68835
O=C(C[C@@H]1N=C(c2ccc(cc2)Cl)c2c(n3c1nnc3C)sc(c2C)C)Nc1ccc(cc1)O	OTX-015	2.68738
S=C(N1CCC(CC1)c1c[nH]cn1)NC1CCCCC1	Thioperamide maleate	2.68471
OC(=O)[C@H]1O[C@@H](Oc2cc3oc(cc(=O)c3c(c2O)O)c2ccccc2)[C@@H]([C@H]([C@@H]1O)O)O	TJ-14	2.68306
CC(c1nccc(c1)Nc1nccc(c1)Oc1cn(nc1C1CCOCC1)C1CC1)(O)C	LY-3200882	2.67673
NNC(=O)CN1C(=O)CN=C(c2c1ccc(c2)Br)c1ccccc1	Gidazepam	2.67319
OC(=O)[C@]1(C)CCC[C@@]2([C@@H]1CC[C@]13[C@H]2CC[C@@](C3)(C(=O)C1)C)C	Isosteviol	2.67305
CCN(CC(c1ccccc1)OC(=O)c1ccccc1)CC	ELUCAINE	2.67227
Clc1ccc(cc1)[C@@](c1cncn1C)(c1ccc2c(c1)c(cc(=O)n2C)c1cccc(c1)Cl)N	tipifarnib	2.67205
COC(=O)Nc1[nH]c2c(n1)cc(cc2)Sc1ccccc1	FENBENDAZOLE	2.6669
COCC1=C(C(=O)OC(OC(=O)C(C)(C)C)C)N2[C@H](SC1)[C@@H](C2=O)NC(=O)/C(=N\O)/c1csc(n1)N	cefdaloxime pentexil	2.65727
CN(CCNS(=O)(=O)Cc1cccc(c1)Nc1nccc(n1)Oc1ccc2c(c1)cc([nH]2)C)C	Sulfatinib	2.65469
C=CC(=O)N1CC[C@H](C1)Oc1nc(Nc2ccc(cc2)N2CCC(CC2)N2CCN(CC2)C)c(nc1CC)C(=O)N	ASP-8273	2.65343
CSCc1cnc(c(c1CNCC)O)C	EMD-21657	2.6527
NCCCC(=O)N1CCCC2(C1)Cc1ccccc1CN2C(=O)c1ccc(cc1)OC		2.64961
C[C@@H]1O[C@H](C)CN(C1)c1ccc(cn1)NC(=O)c1cccc(c1C)c1ccc(cc1)OC(F)(F)F	Sonidegib phosphate	2.64911
Cn1c2ccccc2c2c1CCNCC2		2.64861
CC[Hg]Sc1ccccc1C(=O)[O-]	THIMEROSOL	2.6476
C[C@@H](N(CC#C)C)Cc1ccccc1		2.64668
CNC(=O)Cn1c(=O)n(c2c1cccc2)C1CCN(CC1)C1Cc2c3c1cccc3ccc2	MT-7716	2.64452
CN(c1ccc(cc1)NC(=O)N(C1CCCCCC1)Cc1cccc(c1)CN(C(=O)Nc1ccc(cc1)N(C)C)C1CCCCCC1)C	YM 17E	2.64154
ONC(=O)[C@H](N1CC[C@@](C1=O)(N)c1ccc(cc1)OCc1cc(C)nc2c1cccc2)CC(C)C	BMS-561392	2.63938
CN(CC[C@@H](Nc1ccc(cc1[N+](=O)[O-])S(=O)(=O)NC(=O)c1ccc(cc1)N1CCN(CC1)Cc1ccccc1c1ccc(cc1)Cl)CSc1ccccc1)C	ABT-737	2.63899
CN(CCC(c1ccccc1)Oc1ccc2c(c1)c(=O)cc(o2)c1ccccc1)C	ANSOXETINE	2.63533
COc1ccc2c(c1)c1nn(c3c1c([nH]2)c(cc3)[N+](=O)[O-])CCCN(C)C	Pyrazoloacridine	2.6299
O=C1C=CC(C=C1)(O)c1cc2c(n1S(=O)(=O)c1ccccc1)cccc2	BW-114	2.62269
O=C(c1ccc(cc1)F)NP(=O)(N)N	flurofamide	2.61983
N(CCc1ccccc1)CCOc1ccccc1		2.61873
CCC1=C(C)NN=C(c2c1cc(OC)c(c2)OC)c1ccc(c(c1)OC)OC	dextofisopam	2.60908
O=C([C@H]1CC[C@@H]2[C@]1(C)CC[C@H]1[C@H]2CC[C@@H]2[C@]1(C)C=C(F)C(=O)N2C)NCc1nc2c([nH]1)nccc2	MK-0773	2.60677
CC(NNC(=O)c1ccncc1)C	IPRONIAZID	2.60536
CCN(CCOC(=O)c1ccc(cc1)N)CC		2.6038
OC(=O)CCCCCNC(=N)N		2.60101
Fc1cccc(c1)c1nn(c(=S)n1C)C	Suritozole	2.59864
CC[C@@H](C(=O)O[C@H]1C[C@@H](C)C=C2[C@H]1[C@@H](CC[C@@H]1C[C@@H](O)CC(=O)O1)[C@H](C=C2)C)C	Lovastatin75330-75-5	2.59769
CO/N=C(/c1csc(n1)N)\C(=O)NC1C2SCC=C(N2C1=O)C(=O)O	ceftizoxime	2.59714
COc1cc(OC)ccc1/C=C/1\CCCN=C1c1cccnc1	DMXB-Anabaseine	2.59713
O=C1NC(=O)NC1(C)CS(=O)(=O)N1CCC(CC1)c1ccc(cc1)F	AZD-3342	2.59596
NC(=O)C1c2ccccc2CCc2c1cccc2	CYHEPTAMIDE	2.59567
N#Cc1cc(Cl)cc(c1)C(=O)c1cc(Cl)ccc1OCC(=O)Nc1ccc(cc1C)S(=O)(=O)N	GW-8248	2.59562
OC1CCN(CC1)CCCCCCOc1ccc2c(c1)c(=O)c(c(o2)c1ccccc1)C	NPC 16377	2.59517
OC(=O)COC(=O)Cc1ccccc1Nc1c(Cl)cccc1Cl	ACECLOFENAC	2.58429
O=CN(/C(=C(/SC(=O)c1ccccc1)\CCOP(=O)(O)O)/C)Cc1cnc(nc1N)C	benfotiamine, Alterix	2.5824
COc1ccc2c(c1)c(CC(=O)OCCSCC(=O)NCCCOc1cccc(c1)CN1CCCCC1)c(n2C(=O)c1ccc(cc1)Cl)C	CP-6	2.5823
CCCCC#Cc1nc(NC)c2c(n1)n(cn2)[C@@H]1O[C@@H]([C@H]([C@H]1O)O)CO		2.58077
OC(=O)[C@@H](O)C	ammonium lactate	2.5801
O=C(C1CCCN(C1)S(=O)(=O)c1cccc(c1)C(F)(F)F)N1CCC(CC1)N1CCCC1=O		2.5796
CN1CCCC1CCNS(=O)(=O)c1ccc2c(c1)CN(CC2)CC1CCCCC1	SAR-110894	2.57066
C#CCOc1ccc(cc1)Nc1nc(ncc1F)Nc1ccc(c(c1)S(=O)(=O)NC(=O)CC)C	R-932348	2.56725
CCN1CCN(CC1)c1nc2ccccc2c(c1)c1ccccc1	AD-2646	2.56418
CCN(CCOC(=O)c1ccc(cc1)N)CC		2.56304
C/C(=C\C=C\C=C(\CC/C=C(/CC/C=C(/CCC=C(C)C)\C)\C)/C)/CC/C=C(/CC/C=C(/CCC=C(C)C)\C)\C	trans-Phytoene	2.56047
COCCCN1CC(NCC)c2c(S1(=O)=O)sc(c2)S(=O)(=O)N	brinzolamide	2.55801
NCCCC(=O)N(CCC=C1c2ccccc2CCc2c1cccc2)C	Nortriptyline-GABA	2.55508
O=C1CCc2c(N1)ncc(c2)/C=C/C(=O)N(Cc1oc2c(c1C)cccc2)C		2.55497
C[C@@]1(CSC(=N1)c1cccc(c1O)OCCOCCOCCOC)C(=O)O	FBS-0701	2.5532
C[C@@H](OC(=O)[C@@H](N)C)COc1cn2c(c1C)c(ncn2)Oc1ccc2c(c1F)cc([nH]2)C	brivanib alaninate	2.54849
[O-][N+](=O)O[Ga](O[N+](=O)[O-])O[N+](=O)[O-]	Gallium(III) nitrate hydrate	2.54627
CCN(C(=O)N[C@@H]1CN(C)[C@H]2C(=C1)c1cccc3c1c(C2)c[nH]3)CC	lisuride hydrogen maleate, Sinoxa	2.536
COc1cc(Nc2ncc(c(n2)Nc2ccc3c(n2)NC(=O)C(O3)(C)C)F)cc(c1OC)OC	R406	2.53349
N#Cc1ccccc1/C=C/C=C/C(=O)N1CCN(CC1)c1ccccn1	F-16618	2.53301
O=C(Nc1cn2c(c1C)c(ncn2)Nc1ccc2c(c1)cnn2Cc1cccc(c1)F)OC[C@@H]1COCCN1	AC480 (BMS-599626)	2.53223
COc1ccc(nn1)N1CCN(CC1)c1cccc(c1)C	R-61837	2.53113
O=C(N1CCCC2(C1)Cc1ccccc1CN2C(=O)C)c1ccccc1		2.53103
CO[C@@H]1[C@@H](C[C@H]2O[C@]1(C)n1c3ccccc3c3c1c1n2c2ccccc2c1c1c3CNC1=O)N(C(=O)c1ccccc1)C	PKC412	2.53023
Clc1ccc(cc1)C1=C(CN2CCN(CC2)c2ccc(cc2)C(=O)NS(=O)(=O)c2ccc(c(c2)S(=O)(=O)C(F)(F)F)N[C@@H](CSc2ccccc2)CCN2CCOCC2)CC(CC1)(C)C	navitoclax	2.52929
CCOC(=O)Nc1on[n+](c1)N1CCOCC1	molsidomine	2.52144
Fc1ccc(cc1)c1sc(cc1c1ccc(cc1)S(=O)(=O)C)Br	Thiophene, 5-bromo-2-(4-fluorophenyl)-3-[4-(methylsulfonyl)phenyl]-	2.51593
Nc1cc2ccccc2nc1C(O)(C)C		2.51389
O=Cc1cc(n(c1C)c1ccc(cc1)OCC(=O)O)C	BB-2983	2.50973
COC(=O)C1=COC(C2C1CC1N(C2)CCc2c1[nH]c1c2cccc1)C	RAUBASIN	2.50202
CN[C@H](C(=O)N[C@H](C(=O)N1CCC[C@H]1C(=O)Nc1snnc1c1ccccc1)C1CCCCC1)C	GDC-0152	2.49818
CN1[C@@H]2CC[C@H]1CC(C2)NC(=O)n1c(=O)n(c2c1cccc2)C(C)C		2.49528
COc1cc(/C=C/C(=O)OCCCCO[N+](=O)[O-])ccc1OC(=O)C(c1ccc(c(c1)F)c1ccccc1)C	NCX-2216	2.49312
COC(=O)Nc1nc2c(n1)ccc(c2)Sc1ccc(cc1)NC(=O)[C@@H](N)C	DENIBULIN	2.4913
COC(=O)c1nc2c(o1)ccc(c2)Cl	trabectedin	2.49075
OC(=O)[C@@]1(CC[C@H](CC1)Oc1cccc(c1F)Cl)Cc1cccc(n1)Nc1nccs1	MK-5108	2.49045
COc1cccc(c1)c1ccc(cc1)CN1CCCC1C(=O)NCc1ccc(cc1)C(F)(F)F		2.48971
CSC[C@@H](C(=O)N[C@H]([C@H](C(=O)OC(C)C)O)CC1CCCCC1)NC(=O)[C@@H](CC(=O)N1CCC(CC1)NC)Cc1ccccc1	CP-108671	2.47993
OC(=O)C1CCN1C12CC3CC(C2)CC(C1)C3	CARMANTADINE	2.47841
C[C@@H]1N=C(c2c(NC1=O)ccc(c2)[N+](=O)[O-])c1ccccc1Cl	MECLONAZEPAM	2.4767
O=C1CC2(CCCC2)CC(=O)N1CCNCC1COc2c(O1)cccc2	8-Azaspiro[4.5]decane-7,9-dione, 8-[2-[[(2,3-dihydro-1,4-benzodioxin-2-yl)methyl]amino]ethyl]-, monomethanesulfonate	2.47601
OCCC[C@@]1(C)/C(=N/O)/CC[C@@H]2[C@@H]1CC[C@]1([C@H]2CC[C@@H]1[C@@H](CCCC(C)C)C)C	TRO-40303	2.47564
CCOC(=O)C(NC(C(=O)N1CC2(CC1C(=O)O)SCCS2)C)CCc1ccccc1	spirapril	2.47412
CCN1CCN(CC1)C(=O)C1CCN(CC1)Cc1cc2c(n1)cccc2	AVR-560	2.46997
Cc1ccccc1C(=O)n1c(=O)c(F)cn(c1=O)C(=O)C	ATOFLUDING	2.4694
CCCN1CCC[C@@H](C1)c1cccc(c1)C#N	DS 121	2.46521
COc1ccc(c2c1CCCC2N(C)C)Cl	LOMETRALINE	2.46484
OC[C@@](c1ccccc1)(C(=O)O[C@H]1CN2CCC1CC2)CC[S@+](C)[O-]	REVATROPATE	2.46204
N[C@@H](C(=O)O)Cc1ccccc1	D-PHENYLALANINE	2.45857
C=CC/N=C/1\S[Cu-]OC(=O)c2cc(N1)ccc2	ALLOCUPREIDE SODIUM	2.45817
CC(Cc1ccc(cc1)c1onc(n1)c1ccc(c(c1)F)CN1CC(C1)C(=O)O)C	S1p receptor agonist 1	2.45713
Cc1c(ccc2c1OCCO2)Nc1ncc[nH]1	AGN 192836	2.45589
COc1cccc(n1)NCC(Cn1c2ccc(cc2c2c1ccc(c2)Br)Br)F	(-)-P7C3-S243	2.45545
Oc1ccc2c(c1)CC[C@@H]1[C@@H]2CC[C@]2([C@H]1CCC2=O)C	Estrone	2.45481
CCOC(=O)c1ccc(cc1)OCCN1C[C@H](O)[C@H]([C@@H]([C@H]1CO)O)O	EMIGLITATE	2.45445
CNc1cccc(c1)NC(=O)NC1N=C(c2ccccn2)c2c(N(C1=O)CC(=O)C(C)(C)C)cccc2	Netazepide	2.45115
NC(Cc1ccccc1)COC(=O)N	R-228060	2.45005
Clc1cc2NC(CSCC(F)(F)F)NS(=O)(=O)c2cc1S(=O)(=O)N	EPITHIAZIDE	2.44962
COc1ccccc1N1CCN(CC1)CCc1oc(=O)[nH]c1c1ccc(cc1)F	zoloperone	2.44755
CCOc1ccc(cc1)S(=O)(=O)Nc1ncccn1		2.44732
O=C(N1CCC(CC1)c1ccccc1)C1CCN(CC1)C(=O)C1CCCC1		2.44583
COc1cc2c(ccnc2cc1OC)Oc1ccc(c(c1)Cl)NC(=O)Nc1noc(c1)C	tivozanib (ophthalmic), Ophthotech	2.44256
OC(=O)CC[C@@H](C(=O)O)NC(=O)c1ccc(cc1)N(Cc1cnc2c(n1)c(N)nc(n2)N)C	L-Glutamic acid, N-[4-[[(2,4-diamino-6-pteridinyl)methyl]methylamino]benzoyl]-	2.44246
CCC[C@H]1CN([C@@H](C1)C(=O)NC(C1O[C@H](SC)[C@@H]([C@H]([C@H]1O)O)OP(=O)(O)O)[C@@H](Cl)C)C	clindamycin phosphate, KV	2.44232
NC(=O)Nc1cc(sc1C(=O)N[C@H]1CCCNC1)c1cccc(c1)F	AZD-7762	2.44076
COc1c(OC)cc2c(c1OC)c1ccc(c(=O)cc1[C@H](CC2)NC(=O)C)OC	COLCHICINE	2.4405
COc1ccc(cc1)S(=O)(=O)Nc1cccnc1Nc1ccc(cc1)O	ABT-751	2.43678
N#Cc1ccc(cc1C(F)(F)F)N1CCCC1C(C(F)(F)F)O	LGD-4033	2.43482
[O-][N+](=O)c1cc(ccc1I)C(=O)N	Iniparib	2.43297
CCOC(=O)C(CCCCOc1ccc(cc1)OCCCCCn1ccnc1)(C)C	YM-534	2.4306
CN1CCN(CC1)Cc1ccc(cc1C(F)(F)F)NC(=O)c1ccc(c(c1)C#Cc1cnc2n1nccc2)C	Ponatinib	2.43059
CO/N=C/1\CCCC(=C1)C#Cc1cccc(n1)C	ABP 688	2.42936
CN1C2CCC1CC(C2)OC(=O)c1cc(Cl)cc(c1)Cl	Bemesetron	2.42767
Brc1ccc(c(c1)C(=O)Nc1cc(ccc1C(F)(F)F)C(F)(F)F)O	IMD-0560	2.42739
CCOC(=O)[C@@H](NP(=O)(N[C@H](C(=O)OCC)C)COCCn1cnc2c1nc(N)nc2NC1CC1)C	GS-9219	2.42395
COCCOCCOCCOCCOC(=O)OC[n+]1ccc(cc1)N/C(=N/C#N)/NCCCCCCOc1ccc(cc1)Cl	Teglarinad chloride	2.42058
O=C1C(=CC(=O)C(=C1C)C)CCCCCCCCCC[P+](c1ccccc1)(c1ccccc1)c1ccccc1		2.42005
Nc1cccc(c1)n1ccccc1=O	AMPHENIDONE	2.41751
CNCCc1ccc(c(c1)O)O	Epinine	2.4166
CC(=O)O[C@H]1CC[C@]2(C(=CC[C@@H]3[C@@H]2CC[C@]2([C@H]3CC=C2c2cccnc2)C)C1)C	abiraterone acetate	2.41588
CCCCC/C=C\C/C=C\CCCCCCCc1ccco1	AV-102	2.41527
O=C(N1CCCCC1CN1CCCC1)Cc1ccc(cc1)C(F)(F)F	BRL-52656	2.41457
O[C@@H]1[C@H](O)[C@@]2(C([C@H]1CC2)(C)C)C	2,3-cis/exo-Camphanediol	2.41403
CCC[C@@H](c1cccnc1)Nc1nc(ncc1C)c1ccc(c(c1)OC)NC(=O)NCC	Lexibulin hydrochloride	2.41189
CCOC(=O)[C@@H](NC1=C(Br)C(=O)C21CCCCC2)Cc1ccc(cc1)Nc1nccc2c1cncc2	Zaurategrast	2.4052
COC(=O)[C@H]1NC[C@H](C1)Oc1ccc(cc1)Cl		2.40312
NCC(=O)O	GLYCINE	2.40219
OC(=O)C1(C)CCN(CC1)C(=O)c1ccc2c(c1)OC(O2)(F)F		2.4018
O=C(c1ccc(cc1)/C=C/c1cnc2c(c1)cccc2)Nc1cc(n(c1)C)C(=O)Nc1cc(n(c1)C)C(=O)NCCN1CCOCC1	MGB-BP-3	2.40061
COc1c(OC)ccnc1CS(=O)c1nc2c([nH]1)ccc(c2)OC(F)F	pantoprazole sodium	2.39933
O=C(c1ccccc1)OC(c1ccccc1)CCN1CCCCC1		2.39796
N#Cc1cccnc1N1CCOCC1		2.39563
CO[C@]12C[C@@H](COC(=O)c3cncc(c3)Br)CN([C@@H]1Cc1c3c2cccc3n(c1)C)C	nicergoline SR, Ethypharm	2.39051
Fc1ccc(cc1)c1ccc([nH]1)CN1CCN(CC1)c1cccc2c1occ2	ELOPIPRAZOLE	2.39018
NC(=O)/C=C/c1ccccc1C	U 77863	2.38995
Cc1ccn(n1)c1ccc(c(c1)C(F)(F)F)C(=O)N1Cc2cccnc2Nc2c1cccc2	WAY 141608	2.38954
Cc1ccc(c(c1)OCCCC(C(=O)O)(C)C)C	GEMFIBROZIL25812-30-0	2.38446
c1ccc(cc1)COc1ccc(cc1)CCNc1ccc2c(c1)n(CCN1CCCC1)nc2		2.38331
OCC1C/C(=N/OC)/CN1C(=O)c1ccc(cc1)c1ccccc1C	OBE-001	2.38227
COC(=O)C(c1ccccc1)C1CCCCN1	methylphenidate HCl	2.38221
CNCC/C=C/c1cccnc1	METANICOTINE	2.38087
c1scc(n1)c1nc2c([nH]1)cccc2	THIABENDAZOLE148-79-8	2.37673
OC(COc1cccc2c1SCCC2)CNC(C)(C)C	Tertatolol hydrochloride	2.37591
CCCCCCCC(=O)OCC(CO)O	MONOCAPRYLIN	2.37331
CCCCCCCCCCCCCCSCC(=O)O	Tetradecylthioacetic acid	2.3673
O=NSC[C@H](C(=O)N1CCC[C@H]1C(=O)O)C	S-NITROSOCAPTOPRIL	2.3673
NCC(=O)N1CCCC2(C1)Cc1ccccc1CN2C(=O)c1ccccc1		2.36698
OC1CCC2([C@H](C1)CCC1C2[C@H](O)CC2(C1CCC2C(=O)C)C)C		2.36491
Cc1cccc(c1)NS(=O)(=O)c1ccc(c(c1)C(=O)N1CCN(CC1)CCN1CCCC1)Cl		2.36322
O=C(Cn1cnc2c1c(=O)n(C)c(=O)n2C)Nc1ccc(cc1)C(C)C	HC-030031	2.35855
OC(=O)/C=C/c1ccc(cc1)c1[nH]c2c(n1)n(CC1CCCCC1)c(=O)n(c2=O)CC1CCCCC1		2.3583
CCN([C@@H]([C@H](c1ccccc1)O)C)CC		2.35651
COc1c(OC)ccc2c1c[n+](C)c1c2ccc2c1cc1OCOc1c2	chelerythrine	2.35465
COc1ccc2c(c1)sc(n2)NC(=O)Nc1ccccc1	Frentizol	2.35431
COc1cccc(c1)C(=O)NC1CCN(CC1)C(=O)c1ccc(cc1)c1cccc(c1)OC		2.34867
CCn1cc(C(=O)O)c(=O)c2c1nc(N1CCNCC1)c(c2)F	enoxacin	2.34848
CNCc1[nH]c2c(n1)n(CC(C)C)c(=O)n(c2=O)C		2.34689
OC(=O)C1Cc2c(C1)c(ccc2)S(=O)(=O)N1[C@H](C)CN(C[C@@H]1C)c1ccc(cc1)OC(F)(F)F	KD-3010	2.34637
CCOC(=O)CCN[N+](CC)(C)C	EDIHYP	2.34416
CCN([C@H](Cc1ccc(cc1)OC)C)CCCC(=O)C1CCCCC1	SECOVERINE	2.34366
O=C(/C=C/c1cccnc1)NCc1ccc(cc1)C(=O)Nc1cc(F)ccc1N		2.34305
CCCNc1nc(C)nc(c1C)Nc1c(Cl)cc(c2c1nccn2)C		2.34263
COc1ccc(c(c1)OC)CS(=O)c1ncccc1C(=O)Nc1ccnc(c1)N(C)C	AD 8240	2.34084
Fc1cccc(c1)/N=C/1\SC(C(=O)N1Cc1ccccc1)c1ccc(cc1)NC(=O)[C@@H](NC(=O)Cc1ccccc1)C		2.34024
CC[C@@H](c1nc2cccc(c2c(=O)n1c1ccccc1)F)Nc1ncnc2c1nc[nH]2	Idelalisib	2.33911
OC(CN1CCN(CC1)C(c1ccc(cc1)F)c1ccc(cc1)F)CSc1ncnc2c1nc[nH]2		2.33845
CCCOc1ccccc1c1nc(O)c2c(n1)[nH]nn2	zaprinast	2.33134
Nc1ccc(cc1)C(=CC(=O)N1CCC(CC1)Cn1c(C)nc2c1cncc2)c1ccccc1	dersalazine	2.33058
O[C@H]1CC(=O)O[C@@H](C1)/C=C/C(=C(c1ccc(cc1)F)c1ccc(cc1)F)c1nnnn1C	BMY 22089	2.32791
CCCC(C(=O)O)NC(C(=O)N1C2CCCCC2CC1C(=O)O)C	Perindoprilat	2.32728
CCC(=O)N1Cc2ccccc2CC2(C1)CCCCN2CC1CNCC1		2.32491
CCCCn1ccc(c(c1=O)Cl)N1CCC(CC1)c1ccccc1	LCB01-0371	2.32424
OCCC1C[C@H](C)C(O)/C=C/C=C/C[C@@H](OC(=O)CC(C([C@H]1O[C@@H]1O[C@H](C)C([C@@H](C1O)N(C)C)OC1O[C@H](C)C([C@](C1)(C)O)O)OC)OC)C	Leucomycin tartrate	2.31953
O=C1CC[C@@]2(C(=C1)C=C[C@@H]1[C@H]2CC[C@]2([C@H]1CC[C@@H]2C(=O)C)C)C	dydrogesterone, Pantarhei	2.31782
CC[C@@H]([C@H](O)C)Nc1nc(NCc2cnc(cc2C)C)c2c(n1)n(cn2)C(C)C	CYC065	2.3164
OC(=O)c1cc(NCCc2ccc(cc2)C(F)(F)F)ccc1O	AAD-2004	2.31468
N#Cc1ccc2c(c1)C(=CC(O2)(C)C)c1ccccn1		2.31368
Oc1ccc2c(c1)OC[C@@H]([C@@H]2c1ccc(cc1)OCCN1CCCC1)c1ccccc1	NNC-45-0781	2.31311
CC(=O)NCC1CN(C(=O)O1)c1ccc(cc1)C(=O)C	DuP-721	2.30951
O=C(Nc1cc(C)nc2c1cccc2)NCCN1CCC(CC1)(O)Cc1ccccc1	Palosuran	2.30528
CCNc1ncnc2c1nc(n2Cc1ccc(c(c1)OC1CCCC1)OC)C(C)C		2.30455
CCCCCCN(Cc1ccc(cc1)OCCOc1ccc(cc1)CN(CCCCCC)C)C	SYMETINE	2.30305
[O-][N+](=O)c1nccn1CC(COC)O	Misonidazole	2.30131
O=C(CN1[C@@H](CNC2(C1=O)CCCC2)c1cc(F)cc(c1)F)Nc1ccc2c(c1)C[C@@]1(C2)C(=O)Nc2c1cccn2	MK-3207	2.29157
OC(=O)C1(N)CC1	ACPC	2.2884
O=C1/C(=C/c2cnc3n2CCOC3)/[C@@H]2N1C(=CS2)C(=O)O	BLI-489 hydrate	2.28786
O=C1NN=C(C(C1)C)c1ccc(c(c1)[N+](=O)[O-])N1CCN(CC1)C(=N)NCCCc1c[nH]cn1	PH-CBR-2016-001-HVAC-11608-0	2.28607
COc1cccc(c1)c1ccc(cc1)C(=O)N1CCC(CC1)C(=O)NCc1ccc2c(c1)OCO2		2.28573
COC(=O)C1C(CC2N(C1CC2)C)OC(=O)c1ccccc1	PSEUDOCOCAINE	2.28478
COc1cc(O)ccc1C(=O)/C=C/c1ccc(c(c1)O)O		2.28242
O=C(OC1CCC2C1(C)CCC1C2CCC2=CC(=O)CCC12)CCc1ccccc1	Nandrolone phenylpropionate	2.28179
CCN(C(=O)c1c(O)c2c(Cl)cccc2n(c1=O)C)c1ccccc1	Laquinimod	2.27881
OC(=O)C(COP(=O)(O)O)N	phosphatidylserine	2.27509
O=c1oc2c(c(=O)n1c1ccccn1)N(C)S(=O)(=O)c1c2cccc1	droxicam	2.27431
Clc1ccc2c(c1)s[nH]c2=O	TICLATONE	2.27324
CC(C1C(=O)NC(=S)NC1=O)C		2.2726
NCCCC[C@@H](C(=O)N)NC(=O)[C@@H](Cc1ccccc1)NC(=O)[C@@H](Cc1ccc2c(c1)cccc2)NC(=O)[C@@H](NC(=O)C(N)(C)C)Cc1c[nH]cn1	Ipamorelin	2.2722
CCCCCn1c(=O)[nH]c(=O)c2c1nc([nH]2)Cl	GSK-256073	2.27146
O=C1NCc2c(CC31CCCN3CC1CCCCC1)cccc2		2.26944
OCCn1ncc(c1)c1cnc(c2c1scc2c1ccc(cc1)NC(=O)Nc1cccc(c1)F)N	ABT348	2.26624
CCOc1ccccc1C(=O)N	2-Ethoxybenzamide	2.26481
O=C(Nc1nc(cn1C)O)Nc1cccc(c1)Cl	fenobam	2.26382
COC(=O)Nc1cccc(c1CNc1cccn2c1nc(c2C)C)C		2.26199
O=C(Nc1ccc(cc1)S(=O)(=O)Nc1nccs1)CCC(=O)O	SUCCINYLSULFATHIAZOLE	2.26142
CC#CCC([C@@H](/C=C/[C@H]1[C@H](O)C[C@H]2[C@@H]1C/C(=C/CCCC(=O)O)/C2)O)C	Iloprost	2.261
CCCCC(COC(=O)C(=C(c1ccccc1)c1ccccc1)C#N)CC	OCTOCRYLENE	2.25981
O=C(N1Cc2ccccc2CC2(C1)CCCCN2CC1CCNCC1)C1CCCC1		2.25977
COc1ccc(cc1)CC(=O)Nc1cc2c(cc1[N+](=O)[O-])OC([C@@H]([C@H]2NC1CC1)O)(C)C	NIP-141	2.25864
CC(=O)Oc1ccccc1C(=O)Nc1ncc(s1)[N+](=O)[O-]	NITAZOXANIDE	2.25839
O=C(N1CCC(CC1)n1c(=O)[nH]c2c1cccn2)O[C@@H]1CC[C@H]([C@@H](c2c1nccc2)N)c1cccc(c1F)F	Rimegepant	2.25826
Fc1ccc(cc1)C(=O)CCCN1CCC(CC1)(O)c1ccc(cc1)Cl	Haloperidol	2.25388
CCN([C@H](Cc1ccc(cc1)OC)C)CCCC(=O)C1CCCCC1	SECOVERINE	2.25301
CCC1(CC(=C)C)C(=O)NC(=S)NC1=O	METHALLATAL	2.24816
CN1CCN(CC1)NC(=O)CN1CCN([C@@H](C1)Cc1c[nH]c2c1cccc2)C(=O)c1cc(cc(c1)C(F)(F)F)C(F)(F)F	FK-355	2.24786
OS(=O)(=O)c1ccc2c(c1)nc([nH]2)c1ccccc1	PHENYLBENZIMIDAZOLE SULFONIC ACID	2.24783
CN(CCn1c2nc3cc(C)c(cc3nc2c2c1ccc(c2)O)C)C	9-OH-B-220	2.24475
CC/C=C\C/C=C\C/C=C\CCCCCCCC(=O)O	Linolenic acid	2.24458
N#Cc1cc(NC(=O)COC(=O)C)c(c(c1)NC(=O)COC(=O)C)Cl	Acreozast	2.24356
ClC[C@H]1O[C@@]([C@H]([C@@H]1O)O)(CCl)O[C@H]1O[C@H](CO)[C@@H]([C@@H]([C@H]1O)O)Cl	SUCRALOSE	2.24321
OC(=O)c1oc2c(c1)cc(cc2)Cc1cccnc1	Furegrelate sodium	2.24276
C[C@@H](P(=O)(O)O)NC(=O)[C@@H](N)C	alafosfalin	2.24025
S=C(NC(=O)Cc1ccccc1)Nc1ccc(c(c1)F)Oc1ccnc2c1sc(c2)c1ncn(c1)C	MGCD-265	2.23627
Cl[Zn]Cl	Zinc Chloride	2.23481
O=C(c1ccc(cc1)F)N1CCC(CC1)N1CCCNC1=O		2.23426
C=O	FORMALDEHYDE	2.23375
CC1OC(C(C1O)O)n1cc(F)c(=O)[nH]c1=O	doxifluridine	2.23208
OCC(NCC(c1ccccc1)O)(C)C	fepradinol	2.2304
CC(=O)NN1CC(C)(C)C(=O)c2c1cc(cc2)S(=O)(=O)C(F)(F)F	PC 286	2.22498
COc1ccc(cc1)CN1CCCCC21CN(Cc1c(C2)cccc1)C(=O)C		2.22094
CCOC(=O)c1cncn1C(c1ccccc1)C	Etomidate	2.21438
Clc1ccc(cc1)OC(C(=O)OCCN1CCN(CC1)CCCN1c2ccccc2Sc2c1cc(cc2)C(F)(F)F)(C)C	GYKI-22441	2.21399
COC(=O)[C@@H](NC(=O)Cc1ccccc1)C/C=C/c1ccc(cc1)N(c1ncccn1)C		2.2074
O=C(C(C)(C)C)CCC1C(=O)N(N(C1=O)c1ccccc1)c1ccccc1	TRIBUZONE	2.20635
COc1nc2nc(cn2c2c1CCCC2)C(=O)c1ccccc1	Ru-32514	2.20608
COc1ccc2c3c1O[C@@H]1[C@@]3(CCN(C2)C)C=C[C@@H](C1)O	Galanthamine	2.20494
COC(=O)C(Oc1ccc(c(c1)Cl)Cl)C		2.20373
COc1ccc2c3c1O[C@@]1(C3(CCN(C2)C)C=C[C@@H](C1)O)C		2.1997
CCCN(C(=O)C(NC(=O)c1cccc(c1)F)Cc1ccc(cc1)OCCCN1CCN(CC1)C)CCC		2.19857
COc1ccc2c(c1)ccc(c2)[C@@H](C(=O)O)C	Naproxen sodium	2.19792
OC(C1CC2CC1C=C2)(c1ccccc1)CCN1CCCCC1	Biperiden	2.19727
O=C(Cc1ccccc1)NC1CCN(CC1)c1ccc2n(n1)c(cn2)c1cccc(c1)C(F)(F)F		2.19646
O[C@H]([C@H](C(=O)O)O)[C@H]([C@@H](C(=O)O)O)O	Mucic acid	2.19048
CCOC(=O)c1ncc2c(c1C)c1c(cccc1[nH]2)OC(C)C	ZK-93426	2.18801
COC(=O)C[C@@](C(=O)O[C@@H]1C(=C[C@]23[C@@H]1c1cc4OCOc4cc1CCN3CCC2)OC)(CCCC(O)(C)C)O	HOMOHARRINGTONINE	2.18651
CCCCCCCC/C=C\CCCCCCCC(=O)Oc1ccc2c(c1)CC[C@@H]1[C@@H]2CC[C@]2([C@H]1CCC2=O)C	MERLIN 2	2.18573
O=C(NNS(=O)(=O)c1ccc(s1)CNC(=O)c1ccc(cc1)Cl)CCCNc1ncc(cc1Cl)C(F)(F)F	AS-004509	2.18413
[O-][n+]1cc[n+](c2c1cccc2)[O-]	QUINDOXIN	2.18366
Clc1ccc(cc1)C(c1ccccc1)OC1CC2CCC(C1)N2C	3-ALPHA-[(4-CHLOROPHENYL)PHENYLMETHOXY]TROPANE HCL	2.18055
Cc1ccccc1CN1CCCC21Cc1ccccc1CNC2=O		2.17942
FC1CN(CCC1CNc1ncccn1)C(=O)OCc1ccc(cc1)C	MK-0657	2.17893
CCOCCn1nc(c2c1c(Nc1nccc(c1)C)nc(n2)N(CC)C)C(=O)NS(=O)(=O)C	PF-489791	2.17861
O=C(c1ccc(cc1)/C=C/c1n[nH]c2c1cccc2)N1CCNCC1	KW-2449	2.17645
CCC(=O)N1Cc2ccccc2CC2(C1)CCCN2Cc1ccccc1		2.17579
C=C1CC[C@@]2([C@@]34[C@H]1Oc1c4c(CC2N(CC3)CC2CC2)ccc1O)O	nalmefene	2.1744
NCC1(CCN(CC1)c1ncnc2c1c(C)c[nH]2)C(=O)Nc1cccc(c1)OC(=O)N(C)C	LX-7101	2.17328
N#Cc1nccc(c1)c1[nH]nc(n1)c1ccncc1	topiroxostat	2.17079
COc1ccc2c(c1CN1CCCCC1)oc1c(c2=O)cccc1	mepixanox	2.16993
CO/N=C(\C(=O)N[C@@H]1C(=O)N2[C@@H]1SCC(=C2C(=O)O)CSc1cnns1)/c1csc(n1)N	Cefuzonam	2.16582
COc1nc(C)cnc1NS(=O)(=O)c1cccnc1c1ccc(cc1)c1nnco1		2.1633
COc1cc2nc3c(nc2cc1C(=O)[O-])c(C(=O)NCCN(C)C)c(c1c3cccc1)O	NCU-190	2.16329
N#Cc1cc(CCC(=O)O)ccc1OC[C@@H](CNC(CC1Cc2c(C1)cccc2)(C)C)O	SB-423562	2.16277
COCCOCOc1ccc(cc1C12CC3CC(C2)CC(C1)C3)C(=O)/C=C/c1ccc(cc1)C(=O)O	MX 781	2.16239
O=C(c1ccc2c(c1O)cccc2)Oc1ccccc1		2.16124
CCOC(=O)C(NC(=O)c1cccc(c1)N(c1ccc(c(c1)OC1CCCC1)OC)Cc1cccnc1)C		2.15757
C[C@@H]1C(=O)O[C@H]2[C@H]1CCC(=C1[C@@H]2C(=CC1=O)C)C	Oligvon	2.15658
CCN(CCOc1ccc(cc1)c1sc2c(n1)cc(cc2)Cl)CC	HALETHAZOLE	2.15256
CC(=O)O[C@@H]1[C@H](OC(=O)C)[C@H](O[C@H]1n1ncc(=O)[nH]c1=O)COC(=O)C	AZARIBINE	2.149
OC(=O)[C@H]1C2CCC([C@@H]1Nc1nc(ncc1F)c1c[nH]c3c1cc(F)cn3)CC2	Pimodivir	2.14833
COc1ccccc1OCCNCC(c1ccc(c(c1)S(=O)(=O)N)C)O	AMOSULALOL	2.14759
OC1(CCOCC1)CN1CCC(CC1)COc1noc2c1c(ccc2)O[C@H]1COCC1	PF-04995274	2.14676
CCOC(=O)[C@H]1CC2(c3c1cccc3)CCN(CC2)C(=O)[C@H](NC(=O)C(N)(C)C)CCCc1ccccc1	L 163833	2.14317
Clc1ccc(cc1)c1ccc(cc1Cl)Cl	CB-28	2.13883
CC[N+](CCSC1=Nc2ccccc2N=C(C1)c1ccc(cc1)Sc1ccccc1)(CC)C	Tibezonium iodide	2.13547
O[C@@H]1[C@@H](CNCc2ccccc2)O[C@H]([C@@H]1O)n1cnc(c1N)C(=O)N	GP 531	2.13391
S=C1CN=C(c2c(N1)ccc(c2)Cl)c1ccccc1		2.13332
CC(Oc1ccc2c(c1)c(=O)c1c(o2)ccc(c1)C(=O)O)C	Xanoxic acid	2.13044
CCc1ccc2c(n1)n(CC)c(=O)nc2c1cccc(c1)Cl	YM-976	2.12991
COc1cccc(c1)C(=O)N1CCCC1C(=O)N1CCC(CC1)N1CCCC1=O		2.1298
O[C@H]1C[C@@H](C[C@H]1COS(=O)(=O)N)n1ccc2c1ncnc2N[C@H]1CCc2c1cccc2	Pevonedistat	2.12867
CC(=CCOc1cc(ccc1Cl)NC(=S)c1ccoc1C)C	UC-781	2.12839
OCc1cc(ccc1OCC1CCOCC1)S(=O)(=O)N(c1ccc(cc1)CC)CC(C)C	GSK-2981278	2.12819
CCOc1ccc(cc1)N=Nc1ccc(cc1N)N	ETHOXAZENE	2.12663
O=C(c1ccccc1O)O[Mg-](OC(=O)c1ccccc1O)OC(=O)c1ccccc1O	Choline magnesium trisalicylate	2.12379
CCCCCCCCCCCCC(c1cccc(c1)OC)(CCCN(CCc1cccc(c1)OC)C)C#N	ANIPAMIL	2.1225
O=C1O[Pt]2(NCC3(CN2)CCOCC3)OC(=O)C21CCC2	enloplatin	2.11956
CC(=O)CCc1nc(N)c2c(n1)n(C)c(n2)n1nccn1	ST-4206	2.11826
CN1Cc2c(ncn2c2c(C1=O)c(I)ccc2)C(=O)OCC	[123I]-IOMAZENIL	2.11637
CCN(/C(=C/[N+](=O)[O-])/NC)Cc1ccc(nc1)Cl	Nitenpyram	2.1141
[N-]=[N+]=Nc1cc(ccc1Cl)c1c(N)nc(nc1CC)N	MZPES	2.11245
CCCC(=O)Nc1c(I)cc(c(c1I)CC(C(=O)O)CC)I	Tyropanoate Sodium	2.11086
COCC1(C)CCCN2C1c1oc3c(c1CC2)cccc3	ORM-12741	2.10725
CC(N(C(C)C)CCc1c[nH]c2c1cccc2)C	DIPT	2.10647
CCC(C#C)(/C=C/Cl)O	Ethchlorvynol	2.10572
O=C(C1CCN(CC1)C(=O)C)N1CCC(CC1)c1ccccc1		2.102
COc1ccc2c(c1NC(=S)SCCC(=O)O)nc(s2)C(C)(C)C	PH-CBR-2016-001-HVAC-03620-0I	2.10137
Clc1ccc(cc1)C1=C(CCC(C1)(C)C)CN1CCN(CC1)c1ccc(c(c1)Oc1cnc2c(c1)cc[nH]2)C(=O)NS(=O)(=O)c1ccc(c(c1)[N+](=O)[O-])NCC1CCOCC1	chronic lymphocytic leukaemia therapy, AbbVie	2.09968
OC(COC1CCC(CC1)C(C)(C)C)CNC(C)C		2.09806
COc1cccc(c1)c1ccc(cc1)C(=O)N1CCC(CC1)NC(=O)c1ccc(cc1)F		2.096
CCCCCOc1c(OC)ccc2c1nc(O)c(c2)C(=O)NCc1ccc2c(c1)OCO2	JTE-907	2.09436
Fc1ccc(cc1)CC(=O)N1CCC(CC1)C(=O)N1CCC(CC1)N1Cc2c(C1=O)cccc2		2.09332
N#CC(c1nc2c(s1)cccc2)c1ccnc(n1)OCc1ccc(cc1)CN1CCOCC1	Bentamapimod	2.0923
O=C1CCN(C=C1)c1c(F)cc(c(c1F)F)N1C[C@@H](OC1=O)CNc1ccon1	MRX-I	2.09213
Brc1ccc(cc1)NC(=O)c1cc(Br)cc(c1O)Br	TRIBROMSALAN	2.08811
COC(=O)c1cc(OC)c2c(c1c1c(cc(c3c1OCO3)OC)C(=O)OC)OCO2	Bifendate	2.08632
CCCN1CCCC21CN(Cc1c(C2)cccc1)C(=O)CNC(=O)C		2.08524
Oc1c(cc(cc1C(C)(C)C)CCCOCc1cccnc1)C(C)(C)C	Nicanartine	2.08222
OC(=O)CCc1c[nH]c2c1cccc2	indole-3-propionic acid, Intellect Neurosciences	2.08169
CCN1CCN(CC1)C(c1ccc2c(c1O)nccc2)c1cccs1		2.08163
COc1cc2C[C@](C)(O)[C@@H](C)Cc3c(c2c(c1OC)OC)c(OC)c1c(c3)OCO1	Gomisin A	2.08131
N#Cc1cc(NC2=NCCN2)c(c2c1ncn2)C	ADX-415	2.07901
CC(=CCOc1cc(ccc1Cl)NC(=S)c1ccncc1)C		2.07842
CCCCCCCCCCCCOc1ccc(cc1NC(=N)N)NC(=N)N	LAUROGUADINE	2.07782
CCN(C(=O)CNC(=O)c1cc(OC)c(c(c1)OC)OC)CC	R-548	2.07782
CN1CCN2C(C1)c1ccccc1Cc1c2cccc1	MIANSERIN HYDROCHLORIDE	2.07743
Clc1c2C[N+](Cc2c(c(c1Cl)Cl)Cl)(C)CC[N+](C)(C)C	Chlorisondamine diiodide	2.07739
CC[C@@H]([C@@H](C(=O)N[C@H](C(=O)N1CCC[C@H]1C(=O)N[C@H](C(=O)O)Cc1ccccc1)Cc1nc[nH]c1)NC(=O)[C@@H](NC(=O)[C@H](C(C)C)NC(=O)[C@@H](NC(=O)[C@H](CC(=O)O)N)CCCNC(=N)N)Cc1ccc(cc1)O)C	Human angiotensin II	2.07619
Oc1ccc(cc1)C1(c2ccc(cc2)O)C(=O)Nc2c1cccc2	Oxyphenisatine	2.07461
O=C1COCCN1C1CCN(CC1)C(=O)c1ccc2c(c1)OCO2		2.07369
CCCCc1nc2c(n1Cc1ccc(cc1)c1ccccc1c1[nH]nnn1)nc(c(c2)c1cccc[n+]1[O-])C	SK 1080	2.07056
COCCNC(=O)c1ccnc(c1)C(=O)NCCOC	Lufironil	2.06896
OC[C@H](C(=O)O)N	D-Serine	2.06875
CN(CCCC(=O)N1CCC(CC1)n1c(=O)[nH]c2c1cccc2)C		2.06687
CCN(CCc1ccc2c(c1)C(=O)c1ccccc1CO2)O	P 8892	2.06644
COc1cc(Cc2cnc(nc2N)N)cc(c1OC)OC		2.06608
COc1cc(cc(c1OC)OC)C(=O)OCc1cccc(n1)COC(=O)c1cc(OC)c(c(c1)OC)OC	pirozadil	2.06184
Oc1ccc(cc1)CCC1(CC(=C(C(=O)O1)Sc1cc(C)c(cc1C(C)(C)C)N)O)C(C)C	PD 178392	2.05669
CCC1(CC)C(=O)NC(=O)NC1=O	Barbital	2.0555
N#Cc1cnn(c1)CC(=O)[C@H]1CC[C@@H]2[C@]1(C)CC[C@H]1[C@H]2CC[C@H]2[C@@H]1CC[C@@](C2)(C)O	SAGE-217	2.05533
N#C/N=C(\c1cccnc1)/NCC(C)C		2.05517
CCN(CCOc1cccc(c1)O)CC		2.05456
CCC(C(=O)O)Cc1c(I)cc(c(c1I)N)I	IOPANOIC ACID	2.0532
OCCOCn1cnc2c1nc(N)[nH]c2=O	aciclovir	2.05318
CC(NC1CN(C1)c1c(F)cc2c(c1C)n(cc(c2=O)C(=O)O)c1nc(N)c(cc1F)F)C	KPI-10	2.05057
Cc1ccc(c(c1)c1n[nH]c(c1)c1ccccc1)O	VRT-532	2.04973
O=C1N=C(NC1(c1ccccc1)c1ccccc1)O	phenytoin sodium	2.04895
CCSCc1ccc2c(c1)c1c3C(=O)NCc3c3c4c1n2[C@H]1C[C@]([C@](O1)(n4c1c3cc(cc1)CSCC)C)(O)C(=O)OC	CEP-1347	2.04773
OC1CCN(CC1F)S(=O)(=O)c1cc(ccc1F)C(=O)Nc1cc(F)c(c(c1)F)F	NVR-1221	2.04546
NC(=O)CN1CCCC1=O	piracetam	2.04535
CCCCN1C(=S)N(C(=O)C1=O)CCCC	MERODANTOIN	2.04405
CCCCCCCCCCCCCC[n+]1ccc(cc1)C	Myristyl-gamma-picolinium Chloride	2.04171
COc1cc(C)c(c(c1)OC)c1c(C)nn2c1nc(C)[nH]c2=O		2.04057
O=C1CC[C@]2(C(=C1)C=C[C@@H]1[C@H]2CC[C@]2([C@@H]1[C@@H]1C[C@@H]1[C@]12CCC(=O)O1)C)C	ZK-91587	2.03967
OC[C@@H]([C@H](Oc1nc(SCc2cccc(c2F)F)nc(c1)NS(=O)(=O)N1CCC1)C)O	AZD-5069	2.03887
CC(c1ccc(c2c(c1)c(C)cc2S(=O)(=O)O)C)C	azulene sodium sulfonate	2.03478
COC(=O)COc1ccc(cc1)S(=O)(=O)NCCc1ccccc1		2.03473
Cc1cccc2c1C=Cc1c(C2=CCC[N+](C)(C)[O-])cccc1	Ro-8-1998	2.0347
CC(CCCC(O)(C)C)N	HEPTAMINOL	2.03297
Clc1ccc(c(c1)Cl)Cn1cc(c2c1c(/C=C/C(=O)NS(=O)(=O)c1sc(c(c1)Cl)Cl)cc(c2)F)C	DG-041	2.03202
CCN(c1nc2c(o1)cc(cc2)C(=O)N(C[C@H]([C@H](Cc1ccccc1)NC(=O)OCc1cncs1)O)CC(C)C)C	TMC-558445	2.0301
N#Cc1cc(c2ccncc2)c([nH]c1=O)C	milri	2.02883
Clc1ccc(cc1)C1(O)c2ccccc2C2=NCCN12	mazindol	2.02875
CC[As](=O)(O)O		2.02833
C=C[C@]1(C)C[C@@H](OC(=O)NC(=O)C23CCN(CC2)CC3)[C@]2(C)C(C)CC[C@]3([C@H]([C@@H]1O)C)C2C(=O)CC3	SB 247386	2.02826
OC(=O)C1(CC1)c1ccc(c(c1)F)c1ccc(c(c1)Cl)Cl	CHF-5074	2.02777
OC[C@H]1O[C@H]([C@@H]([C@H]([C@@H]1O)O)O)C1C(=O)C(C(=O)/C=C/c2ccc(cc2)O)C(=O)C(C1=O)(O)[C@@H]1O[C@H](CO)[C@H]([C@@H]([C@H]1O)O)O	Hydroxysafflor yellow A	2.02633
CN1CCC(=C2c3ccccc3CCc3c2cc(cc3)C(=O)O)CC1	CDC	2.0258
CC(C[N+](C)(C)C)OC(=O)C	METHACHOLINE CHLORIDE	2.02369
Cc1cccc(c1C)Cc1c[nH]cn1	Detomidine HCl	2.02339
CCN1CCC[C@H]1CNC(=O)c1cc(ccc1OC)S(=O)(=O)N	LEVOSULPIRIDE	2.01947
Nc1ccc(cc1)[As](=O)(O)O	SODIUM ARSANILATE	2.01927
CCC(NCCNC(CO)CC)CO	Ethambutol	2.01788
CCCCCCCCCC1(C)OCC(O1)COC(=O)N	DIOXAMATE	2.01692
CC(Cc1ccccc1)(N)C	Phentermine HCl	2.01656
C#CCO[C@H]1CN2CCC1CC2	Talsaclidine fumarate	2.01561
FC(c1nnc(cc1c1ccccc1)N1CCNCC1)(F)F	JNJ-39269646	2.01509
NC(=O)c1cnccn1	Pyrazinamide	2.01317
CN(/N=N/c1ccc(cc1)C(=O)O)C	DM-COOK	2.01101
CN1CCC2(CC1)CC(=O)C(O2)C	FPL-14995	2.01051
c1ccc(cc1)c1ncc2c(n1)ccc(c2)n1cncc1	CR-4056	2.01012
COc1cccc2c1OC(CNCCN1C(=O)CC3(CC1=O)CCCC3)CO2	MDL 73975	2.00928
COc1cccc(c1)C(=O)NC1CCN(CC1)C(=O)c1ccc(cc1)c1ccccc1OC		2.00902
N[C@@H]1CC[C@H](CC1)CNC(=O)[C@@H]1CCCN1C(=O)C1(O)c2ccccc2c2c1cccc2	L 372460	2.0077
O=C(Nc1ccc(cn1)c1cnccn1)Cc1cnc(c(c1)C)c1ccnc(c1)C		2.00408
OC(=O)/C=C/c1ccc(cc1)O	p-Hydroxycinnamic acid	2.00296
OC(=O)CCCC(=O)N1Cc2ccccc2CC2(C1)CCCCN2CCc1ccc(cc1)C		1.99914
O=C(C1CCCC1)NC1CCN(C1)c1nc2c(o1)cccn2		1.99771
OCc1cc(C)c2c(n1)cc1c(c2)OC([C@H]([C@@H]1NCCc1ccccc1)O)(C)C	NTC-801	1.99656
O=C1CC[C@@H]2[C@@]34[C@H]1Oc1c4c(C[C@H]2N(CC3)C)ccc1O	Hydromorphone hydrochloride	1.9956
Cc1ccc(cc1F)[C@H]([C@@H]1CCOC(C1)(C)C)CCNCC1CCCCC1	TRV-734	1.99453
CCCCCCCCCCCCCC(=O)O[C@@H](CC(=O)N[C@H]1[C@H](OC[C@H]2O[C@H](O)[C@@H]([C@H]([C@@H]2O)OC(=O)C[C@@H](CCCCCCCCCCC)O)NC(=O)C[C@@H](CCCCCCCCCCC)O)O[C@@H]([C@H]([C@@H]1OC(=O)C[C@H](OC(=O)CCCCCCCCCCCCC)CCCCCCCCCCC)OP(=O)(O)O)CO)CCCCCCCCCCC	Lipid A monophosphoryl	1.99238
Clc1cccc2c1c(=O)n(c(c2)[C@@H](Nc1ncnc2c1nc[nH]2)C)c1ccccc1	IPI-145	1.9919
OC(=O)[C@H](Cc1c[nH]c2c1cc(O)cc2)N.CC[C@H]1O[C@H]([C@@H]([C@@H]1O)O)n1cnc2c1nc[nH]c2=O	Triptosine	1.99137
OC(=O)CCC(=O)O	succinic acid, Vecta	1.99008
OC(COc1ccc(cc1)C#N)CNCCCS(=O)(=O)C		1.99003
O=C(C1CCCN1C(=O)c1ccc(cc1)C(F)(F)F)N1CCC(CC1)N1CCOC1=O		1.98727
OC(=O)CCc1cc(N)c(c(c1)c1ccc2c(c1)cnn2C)OC1Cc2c(C1)cccc2	AK-106-001616	1.98484
O=c1cc(CCCC2(C)CC2)c2c(o1)[nH]c(=O)[nH]c2=O	SCH-900271	1.98455
O=[Hg]	Mercuric Oxide	1.98353
OC(=O)COCCN1CCN(CC1)C(c1ccc(cc1)F)c1ccc(cc1)F	Efletirizine	1.98071
CCCCCCOc1cc(C)c(c(c1C)C)O	HX-1171	1.98058
COc1cc2c(cc1OC)CCn1c2cc(NCC(C)C)nc1=O		1.97799
CS(=O)(=O)c1ccc(cc1)C1CCNCC1	Seridopidine	1.97742
S=P(N1CC1)(N1CC1)N1CC1	ThioTEPA	1.9774
CC(c1c(O)ccc2c1CC[C@@H]1[C@]2(C)CCCC1(C)C)C	TOTAROL	1.97713
COc1cccc(c1)c1ccc(cc1)CN1CCCC(C1)NC(=O)c1ccc(cc1)Cl		1.97671
O=C(C(=O)NC1CC(C)(C)NC(C1)(C)C)Nc1ccc(cc1)Br	NBD-557	1.97431
COc1ccc(cc1)OCC(CN1CCC(CC1)c1ccc(cc1)O)O		1.97419
CCCN1CCCCC21CN(Cc1c(C2)cccc1)C(=O)CC		1.97358
OCCNC(=O)CC(c1ccc(cc1)CC(CCCC(C)C)C)C	E-5050	1.97324
CCN1CCCC21CN(Cc1c(C2)cccc1)C(=O)Cc1ccccc1		1.9732
NCC1CCn2c(C1)c(C1=C(C(=O)NC1=O)c1cn(c3c1cccc3)C)c1c2cccc1	RO 318425	1.97137
O=C(C1CC1)NC1CCN(C1)c1nc2c(o1)cccn2		1.97132
NC[C@@](c1ccc(cc1)Cl)(c1ccc(cc1)c1c[nH]nc1)O	AT-13148	1.96791
CCC(C(c1ccccc1)(C#N)CCN1CCCCC1)C		1.96745
Fc1ccc(cc1)COCC1Oc2c(C1)cc(cc2)C(=O)Nc1cccc2c1oc(cc2=O)c1nnn[nH]1	LM-1453	1.96673
CC[C@H]1CCC[C@H](O[C@H]2CC[C@@H]([C@H](O2)C)N(C)C)[C@@H](C)C(=O)C2=C[C@@H]3[C@H]([C@@H]2CC(=O)O1)C=C(C)[C@H]1[C@H]3C[C@@H](C1)O[C@@H]1O[C@@H](C)[C@@H]([C@H]([C@H]1OC)OC)OC	SPINOSAD	1.96627
O/N=C(/c1ccc(c(c1)O)O)\N	amidox	1.96506
ClCCNP(=O)(O[C@@H]1O[C@H](CO)[C@H]([C@@H]([C@H]1O)O)O)NCCCl	TH-CR-301	1.96449
C#C[C@]1(O)CC[C@@H]2[C@]1(C)CC[C@H]1[C@H]2CC[C@@H]2[C@]1(C)Cc1cn(nc1C2)S(=O)(=O)C	Zanoterone	1.95841
OC(COc1ccc(cc1)C(=O)O)CCc1ccc(cc1)C(C)(C)C	lifibrol	1.95582
Oc1c(N2CCCC2)c(=O)n(c2c1cccn2)c1ccccc1	PIRODOMAST	1.95556
O=C([C@@H](c1cccc(c1)NS(=O)(=O)C)N)N[C@@H]1C(=O)N2[C@@H]1SCC(=C2C(=O)O)C	CEFSUMIDE	1.95521
O[C@H]1CCN(C1)C(=O)c1cc(c2ccccc2)c(=O)n2c1c1cc(Cl)ccc1CC2	Ro-41-3290	1.95473
CNC(=O)Oc1ccc2c(c1)C1(C)CCN(C1N2C)C	physostigmine, Calabar	1.9522
Clc1ccc(nc1)N1C(OC(=O)N2CCNCC2)c2c(C1=O)nccn2	SEP-174559	1.95164
COc1cc2nc(nc(c2cc1OC)N)N1CCN(CC1)C(=O)C1CC2CCC1C=C2	SM-2470	1.94989
CCCCCCCCCCCCCCCC(=O)OCC(C(c1ccc(cc1)[N+](=O)[O-])O)NC(=O)C(Cl)Cl	CHLORAMPHENICOL PALMITATE	1.9475
COC(=O)Nc1nc2c([nH]1)cccc2	carbendazim	1.9468
N#Cc1ccc(cc1)[C@@H]1CN(C[C@@]21C(=O)N(C(=O)N2C)c1cc(Cl)cc(c1)Cl)c1ccc(cn1)C(=O)O	BMS-688521	1.94235
COc1cc2c(ncnc2cc1OC)Oc1cccc(c1)NC(=O)Nc1noc(c1)C(C(F)(F)F)(C)C	RXDX-105	1.94144
CCCCNC(=O)Nc1c(OCCCn2cnc(c2CC)c2ccccc2)cccc1C	E-5324	1.94132
COc1cc(CNc2cn[nH]c(=O)c2Cl)ccc1OC		1.93994
CCn1nnc(n1)C1=CCCN(C1)C	LU 25-109	1.93917
COc1cncc(c1)/C=C/CCNC(C)(C)C		1.93849
CC(=O)NC1(CCN(CC1)CCC(c1ccc(c(c1)Cl)Cl)CN(C(=O)c1ccccc1)C)c1ccccc1	SAREDUTANT	1.93662
ClCCNP(=O)(NCCCl)O	Palifosfamide	1.93325
OCC(c1ccccc1)(C(=O)OC1C[C@@H]2N([C@H](C1)[C@H]1[C@H]2O1)C)O	ANISODINE HYDROBROMIDE	1.93148
COc1ccc(c(c1)CC(NCCc1cc(OC)cc(c1)OC)C)C#Cc1ccccc1	MCN 6186	1.92904
OCCOCn1cnc2c1nc(N)nc2	Desciclovir	1.92835
COc1ccc(cc1)CC(=O)N1CCC(CC1)C(=O)N1CCC(CC1)c1ccccc1		1.92831
CCn1cc2c3c1cccc3C1C(C2)N(C)CC(C1)NC(=O)n1nc(cc1C)C	TOQUIZINE	1.92631
CC(=O)CCN1CCC2=C(c3c(C2C1)cccc3)C	YG-19-256	1.92459
CCN(CCOc1c(Br)cccc1CO)CC		1.9205
COCC(=O)NC1CCN(CC1)c1nc2c(o1)cccn2		1.91858
OCC(C(C(C(CO)O)O)O)O	D-Sorbitol	1.91658
CC[C@@H]1C[C@]1(NC(=O)[C@@H]1C[C@@H]2CN1C(=O)[C@@H](NC(=O)OCC(C)(C)CCCCc1c3CN(C(=O)O2)Cc3ccc1)C(C)(C)C)C(=O)NS(=O)(=O)C1CC1	Vaniprevir	1.9137
OC[C@@H]1CCCN1c1ncc(c(n1)NCc1ccc(c(c1)Cl)OC)C(=O)NCc1ncccn1	avanafil	1.91244
NCCc1ccc(c(c1CCc1ccc(c(c1)O)C)O)O	FPL-65447AA	1.91132
C1=CCC(NC1)c1cccnc1	ANATABINE	1.91125
O=C(C1CCCCN1CC1CC1)Nc1c(C)cccc1C	IPRAVACAINE	1.90546
COC(=O)C(c1cccc(c1)C(n1cncc1)c1ccccc1)C	ODALPROFEN	1.9009
O[C@@H](c1cc(nc2c1cccc2C(F)(F)F)C(F)(F)F)[C@H]1CCCCN1	Mefloquine hydrochloride51773-92-3	1.89884
O=C1C[C@@H]2OCC=C3[C@H]4[C@@H]2[C@@H]2N1c1ccccc1[C@]12CCN([C@H]1C4)C3	STRYCHNINE	1.89804
Fc1ccc2c(n1)oc(n2)c1cnc2c(c1)ccn2C	MK-3328	1.89648
NC1=NC(N(C(=N1)N)c1ccc(c(c1)Cl)OCc1cccc(c1)C(=O)N(C)C)(C)C		1.89593
Brc1ccc2c(c1)c(cc(=O)[nH]2)C(F)(F)F		1.89161
Fc1cccc(c1)Oc1cccc(c1)/C=C/C(N(C(=O)C)O)C	3323W	1.8879
CO/N=C(\c1ccc(cc1)c1ccc(o1)c1ccc(cc1)/C(=N\OC)/N)/N	pafuramidine	1.88751
CCC(C(=O)NC(=O)NC(=O)C)(CC)Br	ACECARBROMAL	1.88576
Nc1ccc(cc1)C1=NN(C(=O)C)[C@@H](Cc2c1cc1OCOc1c2)C	talampanel	1.88
Oc1ccc(cc1)C1CNCCc2c1cc(O)c(c2Cl)O	FENOLDOPAM MESYLATE	1.87843
COc1cc(ccc1OC)C1CCN(CC1)CC[C@H]1CCOc2c1cccc2	TERIKALANT	1.87802
CN1CCc2c(C1)c1ccccc1n2Cc1ccccc1	MEBHYDROLINE	1.87545
N#CCCOC(=O)C1=C(C)NC(=C(C1c1cccc2c1cc(cn2)c1ccccc1)C#N)C		1.8739
ONC(=O)/C=C/c1cccc(c1)S(=O)(=O)Nc1ccccc1	Belinostat (PXD101)	1.87247
CCCCCCC/C=C/C(=O)NCCSCCC1CCCCC1	GH 0966	1.87162
COC(=O)CCc1ccc(cc1)OCC(CNC(C)C)O	ESMOLOL HYDROCHLORIDE	1.87155
CC[C@H]1[C@@H](COc2nccc3c2cc(OC)c(c3)C(=O)N)NC(=O)[C@H]1F	PF06650833	1.87127
O=C(N(c1cccc(c1)OCCN1CCOCC1)CC1=CC(CC1)(Cc1ccccc1)NC(=O)C(Cl)(Cl)Cl)Nc1ccccc1	RWJ-68023	1.87069
CCOC(=O)Oc1c(OC)cc(cc1OC)C(=O)O[C@@H]1C[C@@H]2CN3CCc4c([C@H]3C[C@@H]2[C@@H]([C@H]1OC)C(=O)OC)[nH]c1c4ccc(c1)OC	Syrosingopine	1.86999
Fc1ccc(cc1)C(=O)CCCN1CCC(CC1)(O)c1cccc(c1)C(F)(F)F	TRIFLUPERIDOL	1.86744
O=N(=O)[O-][Pt+2]1([NH2][C@H]2[C@H]([NH2]1)CCCC2)[O-]N(=O)=O	Oxaliplatin Related Compound B	1.86383
OCCOc1cc(O[C@@H]2O[C@H](CO[C@@H]3O[C@@H](C)[C@@H]([C@H]([C@H]3O)O)O)[C@H]([C@@H]([C@H]2O)O)O)cc2c1c(=O)cc(o2)c1ccc(c(c1)OCCO)OC	hidrosmin	1.86361
CCN(CCS(=O)(=O)[C@@H]1CCN2[C@H]1C(=O)O[C@@H](C(C)C)[C@H](C)/C=C/C(=O)NC/C=C\C(=C\[C@H](CC(=O)Cc1nc(C2=O)co1)O)\C)CC	Dalfopristin	1.86179
CCc1nc(N)nc(c1c1ccc(cc1)Cl)N	Pyrimethamine58-14-0	1.86175
CCCCc1nnc(n1c1ccccc1)S		1.86174
OCC(CCn1cnc2c1nc(N)[nH]c2=O)CO		1.86151
OC(=O)CCCN1CCC[C@@H]1COc1ccc(cc1)Oc1ccc(cc1)Cl	DG-051	1.86145
Cc1occc(=O)c1O[V](=O)Oc1c(=O)ccoc1C	VO(ma)2	1.85986
CC1CCC(C(C1)OC(=O)c1cccnc1)C(C)C		1.85938
OC(=O)CCC(=O)N1Cc2ccccc2CC2(C1)CCCCN2CCc1ccc(cc1)C		1.85743
O=C1CCCN1[C@@H]1c2cc(ccc2OC([C@H]1O)(C)C)S(=O)(=O)c1ccccc1	RILMAKALIM	1.85649
CC(=N)NCCS(=O)(=O)C[C@@H](C(=O)O)N	GW-273629	1.84957
NC(=O)c1cccc(c1)[C@@H]1C[C@@H]2CC[C@H](C1)N2CCNCC1CCCCC1		1.84883
CN1CCN(CC1)Cc1ccc2c(c1)CN(C2)C(=O)c1cc(C(C)C)c(cc1O)O	AT-13387	1.84798
Cn1cnc(c1Sc1ncnc2c1nc[nH]2)[N+](=O)[O-]	Azathioprin	1.84792
Clc1ccc2c(c1)S(=O)(=O)NC(=N2)C	DIAZOXIDE	1.84779
CC1c2ccccc2Cn2c1c1C(=O)c3cccc(c3C(=O)c1c2)O		1.84725
CCC1(C)OC(=O)N(C1=O)C	PARAMETHADIONE	1.84713
O=C1C=C[C@]2(C(=C1)CCC1C2(F)C(O)C[C@]2(C1CC(C2(O)C(=O)COC(=O)c1cccc(c1)S(=O)(=O)[O-])C)C)C		1.84689
CCCc1c2nc(cc(c2cc2c1oc(cc2=O)C(=O)O)NC)C(=O)O	MINOCROMIL	1.8441
CCN1CCCCC21CN(Cc1c(C2)cccc1)C(=O)C		1.84401
OC(=O)Cc1ccc(cc1)NC(=O)C	ACTARIT	1.84284
CCOC(=O)[C@@H](C[C@H](Cc1ccc(cc1)c1ccccc1)NC(=O)CCC(=O)O)C	LCZ-696	1.83941
[O-][N+](=O)c1ccc(o1)/C=N/N1CC(OC1=O)CSC	Nifuratel	1.83901
NC(=N)NN1Cc2c(C1)c(Cl)ccc2Cl	AGANODINE	1.8388
CC[N+](Cc1ccccc1Cl)(CCNC(=O)C(=O)NCC[N+](Cc1ccccc1Cl)(CC)CC)CC	AMBENONIUM CHLORIDE	1.83517
OC(=O)Cn1c(nc2c(c1=O)cc(cc2)OCCCN1CCCCC1)c1cccc(c1)Cl		1.83485
CNC(=O)c1ccc2c(c1)S(=O)(=O)c1c(C2=O)cccc1	BW-616U	1.83474
Clc1ccc(cc1)Cn1cc(c2c1cccc2)C(=O)C(=O)Nc1ccc2c(c1)cccn2	Entasobulin	1.83468
CCCCNC1CCc2c(C1)scn2		1.83269
O=C(N[C@H]([C@H](C[C@@H](Cc1ccccc1)NC(=O)[C@H](C(C)C)NC(=O)N(Cc1csc(n1)C(C)C)C)O)Cc1ccccc1)OCc1cncs1	ritonavir	1.83244
CC(=O)N(c1cc(ccc1F)c1ccnc2n1ncc2C(=O)c1cccs1)C	lorediplon	1.83213
COc1cc(CCN(CCCN2CCc3c(C2=O)cc(c(c3)OC)OC)C)ccc1OC	AQ-AH-208-Cl	1.83145
Clc1cccc(c1)C(CNCCNc1cccc(c1)c1cc(ccc1C)C(=O)O)O	GW-2696	1.83072
CCCC(=O)c1cnc2c(c1Nc1ccccc1C)cccc2OCCO	SK&F-97574	1.83043
O=C1CCC2(C(=C1)CCC1C2CCC2([C@@]1(O)CCC2C(=O)C)C)C		1.83007
CCCCCCC(=O)OC[C@H]1O[C@H](O[C@H]2O[C@H](COC(=O)CCCCCC)[C@H]([C@@H]([C@H]2O)O)O)[C@@H]([C@H]([C@@H]1O)O)O		1.82973
O=C(C1CCCN(C1)c1nc2c(o1)cccn2)N(C)C		1.82672
C1CCN(CC1)CCOc1cccc(c1)c1n[nH]c2c1cc(cc2)c1[nH]ncn1	JNK-401	1.82482
OC[C@H]1O[C@@H](c2ccc(c(c2)Cc2ccc(cc2)O[C@@H]2COCC2)Cl)[C@@H]([C@H]([C@@H]1O)O)O	Empagliflozin	1.82031
C[C@H]([C@H]1C(=O)N2[C@@H]1[C@@H](C)C(=C2C(=O)[O-])SC1C[n+]2n(C1)cnc2)O	Biapenem	1.81991
COc1ccc(cc1)C[C@H](NC(=O)[C@@H]1CCCN1C(=O)[C@@H](NC(=O)[C@H](Cc1cccs1)NC(=O)CNC(=O)[C@@H]1C[C@H](CN1C(=O)[C@@H]1CCCN1C(=O)[C@H](CCCNC(=N)N)N)O)CO)CN[C@H](C(=O)O)CCCNC(=N)N	LABRADIMIL	1.81854
O[C@@H]1[C@@H](O)C(O[C@@H]([C@H]1O)C(=O)O)Oc1ccc2c3c1O[C@@H]1[C@@]43CCN([C@H](C2)[C@]4(O)CCC1=C)CC1CC1	nalmefene glucuronide	1.81658
CCCC(COC(=O)N)(COC(=O)N)C	Meprobamate (Schedule Iv)	1.81537
OC(=O)c1ccc(cc1)N	PAB	1.81251
CCN1CCC(C1)CN1c2ccccc2Sc2c1cccc2		1.81101
Cc1cccc[n+]1[Pt-2]([NH3+])(Cl)Cl		1.81052
C[C@H]([C@H]1C(=O)N2[C@@H]1SC(=C2C(=O)OCc1oc(=O)oc1C)[C@H]1CCCO1)O	Faropenem daloxate	1.80897
CCc1ccccc1NC(=O)Oc1ccc2c(c1)C1(C)CCN(OC1N2C)C	GANSTIGMINE	1.80821
Clc1cccc(c1NC1=NCCN1)Cl	Clonidine hydrochloride	1.8069
Clc1ccc(cc1)n1nc2c(c1=O)c[nH]c1c2cccc1	CGS-9896	1.80633
O=C(NC(=O)c1c(F)cccc1F)Nc1cc(Cl)c(cc1Cl)OC(C(C(F)(F)F)F)(F)F	Lufenuron	1.806
NCC(c1cccc(c1)O)O		1.80584
O[C@H]1[C@@H](N)CC(O[C@H]1C)O[C@H]1C[C@@](O)(Cc2c1c(O)c1c(c2O)C(=O)c2c(C1=O)cccc2)C(=O)C	idarubicin	1.80304
O=C(Nc1ccc(cc1)C1S/C(=N\c2cccc(c2)F)/N(C1=O)Cc1ccco1)CNC(=O)Cc1ccccc1		1.80201
O=C1CC[C@H](N1)C(=O)N[C@H](C(=O)N1CCC[C@H]1C(=O)N)Cc1nc[nH]c1	protirelin	1.80133
C1CNC(=CC2=Cc3c(CC2)cccc3)N1	Napamezole	1.79981
COc1ccc2c(c1)CN(CC2c1ccc(c(c1)Cl)Cl)C	diclofensine	1.79895
NC(=NC(=O)c1ccc(c(c1)S(=O)(=O)C)C(C)C)N		1.79884
FC(Oc1ccc(c2c1oc1c2cc(cc1)NS(=O)(=O)C)C(=O)Nc1c(Cl)cncc1Cl)F	Oglemilast	1.79883
Fc1cc2c(=O)c(cn(c2c(c1N1C[C@@H]2[C@H](C1)CCCN2)Cl)C1CC1)C(=O)O	Bay-y-3118	1.79676
C[C@@H](C(=O)N[C@]1(C[C@H]([C@@H]2[C@H]1[C@H]2C(=O)O)Sc1[nH]cnn1)C(=O)O)N	LY-2979165	1.79462
CC(N[C@H]1C=CC(C1)(c1ccccc1)c1ccccc1)(C)C	PH-CBR-2016-001-HVAC-04652-0I	1.79282
SCC(C(c1ccccc1)C)C(=O)NC(C(=O)O)C		1.79152
OC[C@H]1OC(C[C@@H]1O)n1cnc(nc1=O)N	Decitabine	1.78982
CNC(=O)[C@H](N(C(=O)[C@H](N(C(=O)/C=C/CC(N)(C)C)C)Cc1ccc2c(c1)cccc2)C)Cc1ccccc1	Tabimorelin	1.78943
COc1ncccc1c1cnc(c(n1)Nc1ccc2c(c1)ccn2)N		1.7872
O=C([C@@H]1CCCCN1C(=O)N1CCS(=O)(=O)CC1)Nc1noc(c1)C(C)(C)C	cannabinoid receptor-2 agonists	1.78626
[NH3+][Pt-2]1([NH3+])OC(=O)C2(C(=O)O1)CCC2	Carboplatin	1.78287
CCCc1sc2c(c1)[C@@H]1[C@@H](NC2)CCc2c1cc(O)c(c2)O	A 86929	1.78268
CC1NCCN(C1)c1cc2c(cc1F)c(=O)c(cn2C(C)(C)C)C(=O)O	PD-161314	1.78117
O=C(N1CCN(CC1)c1nsc2c1cccc2)CCCC(=O)N1CCCCCC1		1.78055
CNC(=O)ON(C(=O)NC)C(=O)C	Caracemide	1.77907
CNC1CCCN(C1)c1c(F)cc2c(c1OC)n(cc(c2=O)C(=O)O)C1CC1	balofloxacin	1.77803
CN(CCC/N=C/1\CC(Cc2c1c(=O)c1c([nH]2)ccc(c1)Cl)c1ccc(cc1Cl)Cl)C	WR 243251	1.77753
CCCc1c(OCCCOc2ccc(c(c2CCC)O)C(=O)C)ccc2c1oc(CCC(=O)O)cc2=O	FPL-59257	1.77635
O=C(c1c[nH]c2c1cccn2)N1CCN(CC1)C(=O)C		1.77461
CC(=O)NC(c1cc(Cl)ccc1C1CCN(CC1)C(=O)[C@@H]1CN(C[C@H]1c1ccc(cc1F)F)C(C)(C)C)C	C-2624	1.77439
O[C@H](CNC(Cc1ccc(c(c1)F)Cl)(C)C)CO[C@@H](c1ccccc1c1ccc(c(c1)C)C(=O)O)C	Encaleret sulfate	1.77399
OC(=O)[C@H](c1ccc2c(c1)ccc(c2)OCc1ccc2c(n1)cccc2)C	WY 50295	1.7694
Cc1noc(c1)CCCCCCCOc1ccc(cc1)C1=NCCO1	DISOXARIL	1.76796
C=C[C@H]1CN2CCC1C[C@@H]2[C@H](c1ccnc2c1cc(OC)cc2)O	Quinidine	1.76612
NCc1c(CO)cnc(c1O)C	pyridoxamine dihydrochloride	1.76336
O[C@@H]1[C@@H](CN([C@@H]2C[C@@H](C2)CCc2nc3c([nH]2)ccc(c3)C(C)(C)C)C(C)C)O[C@H]([C@@H]1O)n1cnc2c1ncnc2N	Pinometostat	1.76322
CC(OC(=O)C1=C(C)NC(=C(C1c1cccc2c1OCO2)C(=O)OCCN(Cc1ccc(cc1)F)C)C)C	ELGODIPINE	1.76224
CCOC(=O)c1ccccc1OC(=O)CCCCCCCC(=O)Oc1ccccc1C(=O)OCC	TU-2100	1.76097
O=C(C(c1ccc(cc1)O)N)NC1C(=O)N2C1SC(C2C(=O)O)(C)C	amoxicillin, CSL	1.75975
NCCCN(c1nc2c(n1)c(Br)c(c(c2Br)Br)Br)CCCN	SEL-24-B489	1.75851
CC(=O)Nc1ccc(cc1)OC(=O)/C=C(/C=C/C=C(/C=C/C1=C(C)CCCC1(C)C)\C)\C	BMY-30123	1.75815
SCC(C(=O)O)NC(=N)N	IQB-782	1.7568
O=c1cc(n(n1CCCN1CCN(CC1)c1ccccn1)c1ccccc1)c1ccccc1	revenast	1.75621
O=c1[nH]c(=O)[nH]c(c1)C(=O)N[C@H](C(=O)N1CCC[C@H]1C(=O)N)Cc1nc[nH]c1	orotirelin	1.75528
CCC/N=C/1\S/C(=C/c2ccc(c(c2)Cl)OCCO)/C(=O)N1c1ccccc1C		1.75384
CCOC(=O)C(NC1CCc2c(N(C1=O)CC(=O)O)cccc2)CCc1ccccc1	benazepril	1.75333
C=CCN1C[C@H](C)N(C[C@H]1C)C(c1cccc(c1)O)c1ccsc1	DPI-125	1.75321
Clc1ccc2c(c1)nc1c(c2O)c(=O)nnc1=O	M 241247	1.75036
Clc1ccc(cc1)c1coc2c(c1=O)ccc(c2)O		1.74619
C[n+]1cc2c3OCOc3ccc2c2c1c1cc3OCOc3cc1cc2	SANGUINARINE SULFATE	1.7449
COC(=O)Nc1nc2c([nH]1)cc(cc2)C(=O)c1cccs1	nocodazole	1.7434
CCC[C@@H](Oc1nc(N)c2c(n1)n(CCCCCN1CCCCC1)c(=O)[nH]2)C	GSK-2245035	1.74293
CNc1ccc2c(c1C(=O)O)nc(o2)C[C@H]1O[C@@]2(CC[C@H]1C)O[C@@H]([C@@H](C[C@H]2C)C)[C@@H](C(=O)c1ccc[nH]1)C	Calcimycin	1.73959
Oc1cc(O)c2c(c1)[o+]c(c(c2)O)c1ccc(c(c1)O)O	Cyanidin chloride	1.73805
CN1CCCC(C1)C(=O)Nc1c(C)cccc1C		1.73798
OC(=O)[C@H]1Cc2c(N1S(=O)(=O)c1ccc(cc1)OCc1nc(oc1C)c1ccc(cc1)C(F)(F)F)cccc2	LBM-642	1.73717
CC#CCn1c(nc2c1c(=O)n(Cc1nc(C)c3c(n1)cccc3)c(=O)n2C)N1CCC[C@@H](C1)N	Linagliptin (BI-1356)	1.73625
Cc1ccc2c(c1)nc(o2)NC(c1ccccn1)CC1CCCCC1	ontazolast	1.73517
Clc1ccc(cc1)C(=O)c1ccc(cc1)OC(C(=O)O)(C)C	Choline fenofibrate	1.7309
COc1cccc(c1OC)[C@H]1O[C@H](CC(=O)N2CCC(CC2)CC(=O)O)C(=O)N(c2c1cc(Cl)cc2)CC(COC(=O)C)(C)C	Lapaquistat acetate	1.72929
ONC(=O)CN(C(=O)N1CCC[C@H]1C(=O)NCCC(C)C)CCC(C)C	VRC-4156	1.72925
OCCCCSc1ccc(cc1)Cl	W-2719	1.72914
CN1CCC(CC1)n1[nH]c(c(c1=O)Cc1ccccc1)c1ccccc1	Benzpiperilone	1.72784
CC(COC(=O)C1(F)C(=O)NC(=O)NC1O/N=C/c1ccco1)C	TAC-788	1.72661
CCCCCCCOc1ccc(cc1C(F)(F)F)CCC(CO)(CO)N	MT-1303	1.7261
OC(=O)C(c1ccc2c(c1)[nH]c1c2cc(cc1)Cl)C	carprofen	1.72574
Nc1cc(Cl)c(c(c1)Cl)Sc1ccccc1Cl		1.72431
CC1CCC2C31CCC(C(C3)C2(C)C)(C)O	(+)-Cedrol	1.72278
O=C(Nc1ccccc1)OCC1(CCCC1)COC(=O)Nc1ccccc1	CYCLARBAMATE	1.72269
Cc1nc(C)cc(c1)c1cc2c(cc1F)c(=O)c(cn2C1CC1)C(=O)O	WIN 57273	1.72071
NCC(=O)NC(c1ccccc1)(Cc1ccccc1)C	Acetamide, 2-amino-N-(1-methyl-1,2-diphenylethyl)-, (+/-)-	1.71978
CCCCCCCCCCCCCCC[C@H]([C@@H](N)C)O	ES-285	1.71978
O=C(N1CCC(CC1)N1Cc2c(C1=O)cccc2)C1CCN(CC1)C(=O)c1ccccc1C		1.71889
CCCCCCOc1nsnc1C1=CCCN(C1)C	Xanomeline	1.71863
OC[C@H]1CNC[C@H]([C@@H]1O)O	NN-4201	1.71477
CC(CCN(Cc1ccc(cc1)c1ccccc1)C)C		1.71468
NCC(=O)CCC(=O)OCc1ccccc1	Aminolevulinic acid benzyl ester	1.71386
Cc1cc(C)cc(c1)C(=O)N1CCC(CC1Cc1ccccc1)NCc1ccnc2c1cccc2	CGP 49823	1.71236
CCOc1cnc(nc1)NCc1cc2c(C)nn(c2nc1N1CCOCC1)C	K-312	1.71145
O=C(c1ccc(c(c1)O)O)Nc1nc(c(s1)c1ccccc1)c1ccc(c(c1)O)O	COH-29	1.71042
O=C([C@H]1CCC(=O)N1C1CCN(CC1)Cc1ccc(c(c1)C)Cl)Nc1cccc(c1)c1nnnn1C	BI-144807	1.71012
O=C(N(c1cccc(c1)OCCN1CCOCC1)CC1=CC(CC1)(Cc1ccccc1)NC(=O)C(Cl)(Cl)Cl)Nc1ccccc1	RWJ-68023	1.70784
OCC(CCc1ccc(n1C)C(=O)CCCc1ccc(cc1)C)(N)C	CS-0777	1.70772
CN[C@H](C(=O)N[C@H](C(=O)N1CCC[C@H]1C(=O)Nc1snnc1c1ccccc1)C1CCCCC1)C	GDC-0152	1.70751
CN(CC1CCc2c(C1=O)cccc2)C		1.70621
O[C@H]1CC[C@]2(C(=CC[C@@H]3[C@@H]2CC[C@]2([C@H]3CCC2=O)C)C1)C	DEHYDROEPIANDROSTERONE53-43-0	1.70531
NS(=O)(=O)OC[C@]12OC[C@@H]3C([C@@H]2OC(O1)(C)C)OC(O3)(C)C	topiramate	1.7012
CCCN1CCCC21CN(Cc1c(C2)cccc1)C(=O)CC		1.69898
[O-]C(=O)[C@@H]1N2C(=O)C[C@H]2S(=O)(=O)[C@@]1(C)Cn1cc[n+](n1)C	AAI-101	1.69839
Cc1nc2c([nH]1)cc(cc2)n1ncc(c1N)C(=O)c1cc2c([nH]1)cccc2	CH-5183284	1.69717
Cc1cc(nnc1NCCN1CCOCC1)c1ccccc1	minaprine	1.69469
COc1cc2CCN(c2cc1N1C[C@H](C)N[C@@H](C1)C)C(=O)c1ccc(cc1)c1ccc(cc1C)c1noc(n1)C	SB-616234-A	1.69299
COc1cc(ccc1n1c[n+](c(c1)C)COP(=O)(O)[O-])/C=C/1\CCCN(C1=O)[C@H](c1ccc(cc1)F)C	E-2212	1.69099
FC(C1(C#CC2CC2)OC(=O)Nc2c1cc(Cl)cc2)(F)F	efavirenz sprinkle, BMS	1.68784
CCOC(=O)C[C@@]1(CCC)OCCc2c1[nH]c1c2c(C#N)ccc1C		1.68716
CO[C@H]([C@@H]([C@@H](COS(=O)(=O)C)O)OC)[C@@H](COS(=O)(=O)C)O	GYKI-17230	1.68615
CC(N/C=N/c1ccc(cc1)c1ncnc1)C	MIFENTIDINE	1.68444
COc1cccc(c1)S(=O)(=O)N1CCCC1C(=O)N1CCC(CC1)N1CCCC1=O		1.68237
C#CC(c1ccccc1)(c1ccccc1)OC(=O)NC1CCCCC1	ENPROMATE	1.67813
CN(CCCOc1ccc(cn1)c1ccc2c(c1)c1c(cn2)n(c(=O)n1C1CCOCC1)C)C	AZD-0156	1.67766
COc1cc(N)c(cc1C(=O)NC1CCN(CC1)Cc1ccccc1)Cl	clebopride	1.67765
CCN1CCCC1CNS(=O)(=O)c1cc(Cl)c(cc1OC)N	lorapride	1.67751
CC(=O)NC[C@H]1CN(C(=O)O1)c1cc(F)c(c(c1)F)c1ccc(cc1)C(=O)C	PNU 172614	1.67393
C[C@@H]([C@@H](c1ccc2c(c1)OCCO2)Oc1ccc2c(c1)cnn2c1cccc(c1)C(=O)N[C@H]1COCC1)NC(=O)C(F)(F)C	AZD7594	1.67369
C/C(=C\C=C\C(=C\C(=O)O)\C)/CC/C=C(/CCC=C(C)C)\C	peretinoin	1.67283
O=C(C(N1CCCC1)C)Nc1ccccc1C	APTOCAINE	1.67181
O=C(C1CCCC1)NC1CCN(CC1)c1nc2c(o1)cccn2		1.66801
NC1CC1c1ccccc1	Tranylcypromine hydrochloride	1.66509
N#Cc1c(sc2c1CC(=O)O[Sr]OC2=O)N1CC(=O)O[Sr]OC(=O)C1	Ranelic acid distrontium salt	1.66495
[O-][N+](=O)O[C@@H]1CO[C@H]2[C@@H]1OC[C@@H]2SC(=O)C(C)(C)C		1.66382
CCCCC(C/N=C(\N/C(=N/CCCCCC/N=C(\N/C(=N/CC(CCCC)CC)/N)/N)/N)/N)CC	Alexidine dihydrochloride	1.662
CCc1ccc(cc1)CN1CCCC21Cc1ccccc1CNC2=O		1.6604
O=C(c1ccc(cc1)C(=O)N1CCC(CC1)NC(=N)NC(=O)c1nc(Cl)c(nc1N)N)N1CCC(CC1)NC(=N)NC(=O)c1nc(Cl)c(nc1N)N	NVP-QBE170	1.65911
N[C@H](C(=O)O)COCCN	L-4-OXALYSINE	1.65835
Fc1ccc(cc1CNC(=O)[C@@](C(F)(F)F)(c1ccccc1)O)C(F)(F)F	MK-3984	1.65788
Clc1ccc(cc1)Cc1nc2c3CCCCc3ccc2c(c1O)C(=O)O	WAY-197697	1.65787
O[C@H]1CC[C@]2([C@@H](C1)CC[C@@H]1[C@@H]2CC[C@]2([C@]31O[C@@H]3C[C@@H]2c1ccc(=O)oc1)C)C	Bufogenin	1.65769
Brc1cc(Br)c(c(c1)Br)O	BISMUTH TRIBROMOPHENATE	1.65594
Cc1cccc(c1)C(=O)NCN1CCC(CC1)c1cccc[n+]1[O-]	ABT-670	1.65481
O=c1c2ccccc2nc2n1CCCCC2	RLX	1.65448
COC(=O)Nc1[nH]c2c(n1)ccc(c2)C(=O)C1CC1	Ciclobendazole	1.65418
CSc1nn2c(c1S(=O)(=O)c1ccccc1)nc(cc2C)C	AVN-211	1.65316
O[C@@H](c1cccnc1)CNCCc1ccc(cc1)NS(=O)(=O)c1ccc(cc1)c1scc(n1)c1ccc(cc1)C(F)(F)F	L 796568	1.65306
CCOC(=O)c1cccc(c1)N	Tricaine	1.65167
COc1ccc(c2c1OCCO2)[C@@]1(CC[C@H](CC1)C(=O)O)C#N	KW-4490	1.65118
O[C@H]1C[C@@H](O[C@@H]1COP(=O)([O-])[O-])n1cc(C)c(=O)[nH]c1=O	Bisphosphocin Nu-3	1.65063
COc1cc2c(cc1OC)CCN(C2C(c1ccc2c(c1)ccc(c2)OC)C)C(=O)CN1CCCCC1	CPU 23	1.64777
NCCC[C@H](N(C(=O)[C@@H]1CCSCCC(=O)N[C@H](Cc2cnc3c2cccc3)C(=O)NC(C(=O)N[C@H](C(=O)N[C@H](C(=O)N1)CC(=O)N)[C@@H](CC)C)[C@H](CC)C)C)CO	FE-200440	1.64703
O=Cc1cn(c2ccc(cc2F)F)c2c(c1=O)cc(c(n2)N1CCC(C1)N)F	PROTOSUFLOXACIN	1.64544
O=C1N(Cc2c1cccc2)C1CCN(CC1)Cc1ccc(cc1)C(F)(F)F		1.6444
CNC(=O)c1ncc(c(c1)OC)O[C@H](C(=O)N1CCN(C[C@H]1C)C(=O)c1ccccc1)C	PF-00821385	1.64282
OC(=O)[C@H]1CCCC[C@]1(O)c1ccccc1	Cicloxilic acid	1.64102
CCc1cc(OCc2ccc(cc2)c2ccccc2c2nnn[nH]2)c2c(n1)CCCC2	ZD 6888	1.63976
N#Cc1ccc(c(c1Cl)C)N1C(=O)[C@H]2N(C1=O)CC[C@H]2O	BMS-564929	1.63699
O=C(C1CCCN1C(=O)c1ccccc1)N1CCC(CC1)N1CCCC1=O		1.63646
CC(C#C)(OC(=O)N)CC	METHYLPENTYNOL CARBAMATE	1.63491
COC(=O)C1c2cc3c(c(c2C(CC1(O)CC)OC1OC(C)C(C(C1)N(C)C)OC1CC(O)C(C(O1)C)OC1CCC(=O)C(O1)C)O)C(=O)c1c(C3=O)cccc1O	aclarubicin	1.6346
Clc1ccc(c(c1)Cl)C(=O)O	Analben	1.63399
O=C1CCC2=C3[C@H](C[C@]4([C@H]([C@@H]3CCC2=C1)CC[C@@]4(O)C(C(F)(F)F)(F)F)C)c1ccc(cc1)C(=O)C	Lonaprisan	1.63259
C1CC/C(=C\c2ccccc2)/C(C1)N1CCC1	TAZADOLENE SUCCINATE	1.63229
CCOc1ccccc1OCC1CNCCO1	viloxazine ER, Supernus Pharmaceuticals	1.62965
CO[C@H]1CN(CCCCCC(=O)O[C@H]2CN3CCC2CC3)CC[C@H]1NC(=O)c1cc(Cl)c(cc1OC)N	Naronapride	1.6282
C=CC(=O)Nc1cc(Nc2nccc(n2)c2cn(c3c2cccc3)C)c(cc1N(CCN(C)C)C)OC	AZD-9291	1.62786
Clc1ccc2c(c1)c(nc(=O)n2CC(F)(F)F)c1ccccc1	fluquazone	1.62659
CCc1c(cnn1c1ccc(cc1)C)C(=O)N[C@@H]1CC[C@H](CC1)CO		1.62536
NC(=O)C[C@@H]1N=C(c2ccc(cc2)Cl)c2c(c3c1onc3C)cccc2	CPI-0610	1.62523
OC(=O)/C=C/c1cc(F)c(c(c1)F)[C@H]1N(CC(F)(C)C)[C@H](C)Cc2c1[nH]c1c2cccc1	AZD-9496	1.62494
C#CCCN1CCC2(C(C1Cc1c2cc(cc1)O)(C)C)O	butinazocine	1.62398
COc1cc(Cc2cnc(nc2N)N)c2c(c1OC)OC(C=C2)C1CC1	Iclaprim	1.62114
CN(CCc1cccnc1)CCCCN(c1ccccc1OCC(C)C)C(=O)c1cccc(c1)C(F)(F)F	SL-870495	1.62056
OC(=O)[C@@H]1CSSCC(C(=O)N1)(C)C	Limazocic	1.62012
O=CN(C[C@H](C(=O)N[C@@H](C(C)(C)C)C(=O)N1CCN(CC1)Cc1ccc2c(c1)OCO2)CC1CCCC1)O	GBB-83698	1.61976
NCCCCCNC(=O)CC[C@@H](C(=O)O)NC(=O)c1ccc(cc1)N(Cc1cnc2c(n1)c(N)nc(n2)N)C		1.61933
CCCC(=O)O[C@H]1CN2CC[C@@H]([C@@H]2[C@H]([C@@H]1O)O)O	Celgosivir	1.6192
COc1ccccc1OC[C@H](NC[C@H](COc1cnc(=O)c2c1cccc2)O)C	N 1518	1.61655
Oc1cccc(c1)NC(=O)c1ccc(c(c1)O)O		1.6159
Fc1cc(cc(c1)F)N[C@@H](c1cc(cc2c1oc(cc2=O)N1CCOCC1)C(=O)N(C)C)C	AZD-8186	1.61479
OCC(=O)N1CCN(CC1)c1ccc(cc1F)N1C[C@@H](OC1=O)CNC(=O)C	Eperezolid	1.6131
CC(=O)SC[C@H](C(=O)N1CCC[C@H]1C(=O)N[C@H](C(=O)O)Cc1ccccc1)C	alacepril	1.61101
OCC(=O)OC[C@@H]1C=C[C@@H](C1)n1cnc2c1nc(N)nc2NC1CC1	Abacavir acetate	1.61027
COc1cc(cc(c1OC)OC)C(=O)OCCCN1CCCN(CC1)CCCOC(=O)c1cc(OC)c(c(c1)OC)OC	dilazep	1.61008
CN(CCNC(=O)c1nc(Cl)c(nc1N)N)CCNCc1c(O)c(Br)cc2c1CCC2(C)C	ZM 224832	1.60735
CC(CCC([C@@H](NC(=O)C(N(C(=O)[C@@H](OC(=O)N(CCN(C(=O)N1CCOCC1)C)C)Cc1ccccc1)C)Cc1cnc[nH]1)CC1CCCCC1)O)C	FR-115906	1.60531
Oc1nc(=O)n(cc1C)CCCCN1CCN(CC1)c1cc(nc(n1)C(C)(C)C)C(F)(F)F	A-690344	1.60508
NCCCC[C@@H](C(=O)N[C@H](C(=O)N[C@H](C(=O)N[C@H](C(=O)N[C@H](C(=O)N[C@H](C(=O)N[C@H](C(=O)N[C@H](C(=O)N[C@H](C(=O)O)C(C)C)CC(=O)O)CO)CCC(=O)O)[C@H](CC)C)CO)CO)CC(C)C)NC(=O)[C@@H](NC(=O)[C@@H](NC(=O)[C@@H](NC(=O)[C@@H](NC(=O)[C@@H](NC(=O)[C@@H](NC(=O)[C@@H](NC(=O)[C@@H](NC(=O)[C@@H](NC(=O)CNC(=O)[C@H](Cc1ccc(cc1)O)N)CCCNC(=N)N)CCCCN)CCCCN)CCCNC(=N)N)CCCNC(=N)N)CCC(=O)N)CCCNC(=N)N)CCCNC(=N)N)CCCNC(=…	Tat-NR2B9c	1.6048
OC[C@@H](C(=O)O)NC(=O)[C@H](CC(=O)O)NC(=O)CNC(=O)[C@H](CCCNC(=N)N)N	DU-728	1.60477
Cn1ccc(=O)c(c1C)O	3-HYDROXY-1,2-DIMETHYL-4(1H)-PYRIDONE	1.60396
COc1cc(cc(c1OC)OC)[C@H]1[C@H]2C(=O)OC[C@@H]2[C@@H](c2c1cc1OCOc1c2)NC(=O)Cc1ccccc1		1.60245
CCOc1nnc(s1)c1cc(c(c(c1)C(C)(C)C)O)C(C)(C)C	PMI-001	1.60114
NCCC[C@H]1NC(=O)[C@H](CCCCNC(=O)[C@@H](CC(=O)N)NC(=O)[C@H](NC(=O)[C@H](NC(=O)[C@H](NC(=O)[C@H](NC1=O)[C@H](CC)C)Cc1ccccc1)Cc1[nH]cnc1)CC(=O)O)NC(=O)[C@H]([C@H](CC)C)NC(=O)[C@H](NC(=O)[C@@H](NC(=O)C1CSC(=N1)C(C(CC)C)N)CC(C)C)CCC(=O)O	BACITRACIN	1.59978
COc1ccc(cc1)C[C@@H]1NC(=O)[C@@H](NC(=O)CNC(=O)[C@H](CCCNC(=N)N)NC(=O)[C@@H]2CCCN2C(=O)[C@@H](NC(=O)[C@H](CSSC[C@H](NC(=O)[C@@H](NC1=O)CCCNC(=N)N)C(=O)N)NC(=O)C)CC(=O)N)CC(=O)O	TP 9201	1.59915
Cc1cc2CCN3c2c(c1)C(=NC(C3=O)NC(=O)c1ccncc1)c1ccccc1	CI-1018	1.59402
Clc1ccc2c(c1)c(cs2)C(P(=O)(O)O)C(=O)Nc1ccc2c(c1)cccc2	JNJ-10326017	1.59268
COc1cc2CCN(C(c2cc1O)C1(CC1)c1ccccc1Cl)C	BTS 73947	1.59249
O[C@H]1CC(=O)O[C@@H](C1)/C=C/c1c(c2ccc(cc2)F)c2ccccc2c(=O)n1C(C)C	RP 61969	1.5896
CCOC(=O)[C@@H](N[C@H](C(=O)N1CCC[C@H]1C(=O)O)C)CCc1ccccc1	QGC-011	1.58723
Nc1cc(nc(=N)n1O)N1CCCCC1	Minoxidil	1.58579
COc1c(OC)cc2c(c1OC)c1ccc(c(=O)cc1C(CC2)N)OC	(R/S)-N-Deacetyl Colchicine	1.58303
C/N=c\1/[nH]cc(cc1C)c1ccc2c(c1C)n(cc(c2=O)C(=O)O)C1CC1	T3912	1.58225
O=C(C(c1ccccc1)O)OC1CC(C)N(C(C1)(C)C)C	EUCATROPINE	1.58218
CO[C@@]1(NC(=O)C(c2cscc2)C(=O)[O-])C(=O)N2[C@@H]1SC(C2C(=O)[O-])(C)C	TEMOCILLIN	1.58113
O=C(Nc1ncc(s1)CCNc1ncnc2c1scc2)Nc1cccc(c1)Cl	SNS-314	1.57914
NC(=S)C1CCCc2c1nccc2C	isotiquimide	1.57827
OC(=O)Cn1nnnc1c1cscc1	TAT	1.57726
Fc1ccc(cc1)C(=O)CCCN1CCC(CC1)C(c1ccc(cc1)F)O	dihydrolenperone	1.57353
C1CC2=Nc3c(CN2C1)cccc3	DESOXYPEGANINE	1.57201
COc1ccccc1C(=O)N1CCC(CC1)N1Cc2c(C1=O)cccc2		1.57118
N#Cc1c(N)[nH]c(c1C)c1ccccc1F	NS-8	1.57031
CC(C(=O)C)Oc1cc(N)c(cc1C(=O)NC1CN2CCC1CC2)Cl	BMY 33462	1.57024
CC(CCON=O)C	AMYL NITRITE	1.56944
OC(=O)CC(c1cccnc1)NC(=O)[C@@H]1CCCN(C1)C(=O)CCC1CCNCC1	ELAROFIBAN	1.56942
COc1cc2c(cc1OC)CC(=NN=C2c1ccc(cc1)N)C	NERISOPAM	1.56793
CC(C[C@@H]([C@H](CC(=O)N[C@H](C(=O)N[C@H]([C@H](CC(=O)O)O)CC(C)C)C)O)NC(=O)[C@H](C(C)C)NC(=O)[C@H](C(C)C)NC(=O)CC(C)C)C	PEPSTATIN	1.56311
FC(Oc1ccc(cc1OC1CC1)[C@@H](c1cnc(s1)C(C(F)(F)F)(C(F)(F)F)O)Cc1ccc[n+](c1)[O-])F	L 869298	1.55964
Clc1ccc(cc1)[C@@](c1ccccc1)(OCC[C@H]1CCCN1C)C	Clemastine fumarate	1.55721
CC[C@@]1(O)C(=O)OCc2c1cc1c3nc4cccc(c4cc3Cn1c2=O)N	IDEC 132 ORAL	1.55616
CCC1=C[C@H]2CN(C1)CCc1c([C@@](C2)(C(=O)OC)c2cc3c(cc2OC)N([C@@H]2[C@@]43CCN3[C@H]4[C@@](CC)(C=CC3)[C@H]([C@]2(O)C(=O)OC)OC(=O)C)C)[nH]c2c1cccc2	anhydrovinblastine	1.5521
CCN1C(=O)c2cc(ccc2Oc2c1cccc2)NC(=O)c1ccc(cc1)C(F)(F)F		1.55161
CCCn1c2nc([nH]c2c(=O)n(c1=O)CCC)C12CC3CC2CC(C1)C3O		1.55016
CCC(C(=O)NC(=O)N)(CC)Br	CARBROMAL	1.54825
CC(CCC#CC1CC1c1ncnc1)(C)C	GT-2314	1.54809
CC(CCC(=O)CC1N(c2ccc3c(n2)nc(cc3)Cl)C(=O)c2c1cccc2)C	pagoclone	1.54694
CC[C@H](CCCCC(=O)N[C@H](C(=O)N[C@H](C(=O)N[C@H](C(=O)N[C@H]1CCNC(=O)[C@@H](NC(=O)[C@H](CCNCS(=O)(=O)[O-])NC(=O)[C@@H](NC(=O)[C@@H](NC(=O)[C@H](NC(=O)[C@@H](NC1=O)CCNCS(=O)(=O)[O-])CC(C)C)CC(C)C)CCNCS(=O)(=O)[O-])[C@H](O)C)CCNCS(=O)(=O)[O-])[C@H](O)C)CCNCS(=O)(=O)[O-])C	Colistin A sodium methanesulfonate	1.54672
OC(COc1ccccc1OCc1onc(n1)C)CNC(C)(C)C	Proxodolol	1.54556
Nc1ccc(cc1)S(=O)(=O)Nc1scc(n1)C	SULFAMETHYLTHIAZOLE	1.54378
CC(=O)Oc1ccccc1C(=O)OC1OC(=O)c2c1cccc2	talosalate	1.54287
O[C@H]1O[C@@H]2OC3(C)CC[C@@H]4[C@@]2([C@H]([C@H]1C)CC[C@H]4C)OO3	Artenimol	1.5417
COCC(=O)NC1CCCN(C1)c1nc2c(o1)cccn2		1.54109
N=C1NC(=O)N2C1C2	Imexon	1.54012
O=C1c2ccccc2c2c1c1ccccc1c(=O)n2CC1CC1		1.53948
O=C1NCCCN1C1CCN(CC1)C(=O)c1ccccc1F		1.53927
Clc1ccc(cc1)C(=O)Nc1ccc2c(c1)nc(n2C)C		1.53733
Fc1ccc(cc1)c1cc(OCCCCCN2CCCCC2)nc(n1)C	enecadin	1.53582
OC[C@H]1O[C@@H](O)[C@@H]([C@H]([C@H]1OS(=O)(=O)O[O-])O[C@H]1O[C@@H](C(=O)O)[C@@H]([C@H]([C@@H]1O)O)O)NC(=O)C		1.53431
OC[C@@]12CC[C@H]([C@@H]([C@H]2C2=CC[C@H]3[C@@]([C@@]2(CC1)C)(C)CC[C@@H]1[C@]3(C)CC[C@@H](C1(C)C)O)C)C	UVAOL	1.53365
OCC(=O)[C@@]1(O)C[C@H](O[C@@H]2C[C@@H](N)[C@@H]([C@H](O2)C)O)c2c(C1)c(O)c1c(c2O)C(=O)c2c(C1=O)cccc2OC	Epirubicin HCl	1.5333
COc1ccccc1CN[C@H]1C2CCN([C@H]1C(c1ccccc1)c1ccccc1)CC2		1.53212
CCC(c1ccc(cn1)N1CCC(C1=O)Cc1ccccc1N1CCN(CC1)C)(CC)O	CE-210666	1.53136
COC(=O)CC[C@@H]1N=C(c2ccccn2)c2c(n3c1ncc3C)ccc(c2)Br	remimazolam tosylate	1.53114
CCN(C(=O)c1ccc(c(c1)OC)O)CC	ETAMIVAN	1.52772
NS(=O)(=O)c1cncc(c1)c1nc(NCc2ccccn2)c2c(n1)cccc2c1ccccc1	BMS-919373	1.52572
COCC(=O)Nc1cc(ccc1N/C(=N\C(=O)OC)/NC(=O)OC)Sc1ccccc1	Febantel	1.52554
OCC(=O)[C@@]1(OC(=O)c2ccccc2)[C@@H](C)C[C@@H]2[C@]1(C)C[C@H](O)[C@]1([C@H]2CCC2=CC(=O)C=C[C@]12C)F	BETAMETHASONE BENZOATE	1.52533
COC1(CCN(CC1)CCc1c[nH]c2c1cc(F)cc2)CS(=O)c1ccccc1	GR 159897	1.525
CCCCOC(=O)[C@@H](NP(=O)(Oc1cccc2c1cccc2)OC([C@H]1O[C@H]([C@]([C@@H]1O)(C)O)n1ccc(=O)[nH]c1=O)C)C	MBX-700	1.52467
O=c1[nH]c(=O)n(cc1F)C1CCCO1		1.52446
O[C@@H]1[C@H](O)[C@H](O[C@H]1n1cnc2c1ncnc2O)COS(=O)(=O)[O-]	5'-IMS	1.52034
[O-][N+](=O)OCc1cccc(c1)Cl	analog of FR 46171	1.51987
COc1ccc(cc1)C[C@H](NCC(c1cc(O)cc(c1)O)O)C	(R,R)-4-Methoxyfenoterol	1.51927
CCC(=O)O[C@@]1([C@H](C)C[C@@H]2[C@]1(C)C[C@H](O)[C@]1([C@H]2C[C@@H](C2=CC(=O)C=C[C@]12C)F)Cl)C(=O)OC	CGP-13774	1.51763
CCOC(=O)[C@](Cc1ccc(c(c1)O)O)(N)C		1.51644
O=C(c1ccccc1)Oc1ccc2c(c1)CC[C@@H]1[C@@H]2CC[C@]2([C@H]1CC[C@@H]2O)C		1.51582
CC(OC(=O)C(Oc1ccc(cc1)C(=O)c1ccc(cc1)Cl)(C)C)C		1.51531
NCC(c1cc(ccc1F)NS(=O)(=O)C)O	Garomefrine hydrochloride	1.51422
Oc1ccc(cc1C(=O)c1cccs1)C(C)(C)C		1.51344
CN(CCOc1ccc2c(c1)oc1c(c2=O)ccc(c1)OCCN(C)C)C	TILORINE DIHYDROCHLORIDE	1.51326
NC(=O)CN1Cc2ccccc2OC1=O	caroxazone	1.51128
CC(COC[C@H]1O[C@@H]2O[C@@H]3[C@@H](COCC(O)C)O[C@@H]([C@@H]([C@H]3O)O)O[C@@H]3[C@@H](COCC(O)C)O[C@@H]([C@@H]([C@H]3O)O)O[C@@H]3[C@@H](COCC(O)C)O[C@@H]([C@@H]([C@H]3O)O)O[C@@H]3[C@H](O[C@H](O[C@@H]4[C@H](O[C@H](O[C@@H]5[C@H](O[C@H](O[C@H]1[C@@H]([C@H]2O)O)[C@H](O)[C@H]5O)COCC(O)C)[C@H](O)[C@H]4O)COCC(O)C)[C@H](O)[C@H]3O)COCC(O)C)O	Hydroxypropyl-beta-cyclodextrin	1.51097
Nc1ccc(cc1)C(=O)N1C[C@@H]2CN(C[C@H](C1)C2)Cc1ccccc1	AMBASILIDE	1.51093
CSC[C@@H](C(=O)N[C@H]([C@H](C(=O)OC(C)C)O)CC1CCCCC1)NC(=O)[C@@H](NC(=O)N1CCOCC1)Cc1ccccc1	Terlakiren	1.51089
CNCCC(c1cccs1)Oc1cccc2c1OCO2	Ammuxetine	1.50886
CC(=O)NS(=O)(=O)c1ccc(cc1)NC(=O)c1ccccc1C(=O)O	PHTHALYLSULFACETAMIDE	1.50763
CC(c1ccc(cc1)c1nc2n(c1)cccc2)C(=O)O	miroprofen	1.50644
CCCCC(=O)c1cnc2c(c1Nc1ccccc1C)cccc2OCCO	BY-574	1.50321
CCCN(c1cc(C)nc2n1nc(c2c1cnc(cc1C)N(C)C)C)CCC	R-121919	1.50128
Nc1ccc2c(c1)nc1c(c2)ccc(c1)N	Proflavine	1.50101
O=C(Nc1c(Cl)cccc1Cl)CN1CCN(C(C1)C(=O)N)CCCC(c1ccc(cc1)F)c1ccc(cc1)F	mioflazine	1.49962
CC(=O)N[C@H]1CSSC[C@H](NC(=O)[C@@H](NC(=O)[C@@H](NC(=O)[C@@H](NC1=O)Cc1cnc[nH]1)C)C(C)C)C(=O)N	Exherin (trifluoroacetate)	1.49842
OCCOc1cc2ncnc(c2cc1S(=O)(=O)C(C)(C)C)Nc1ccc2c(c1)ncs2	RIP2 kinase inhibitor 1	1.49824
CNC1CCc2c(C1)c1ccccc1[nH]2		1.49814
COC(=O)[C@@]1(O)C[C@]2(CC)CCCN3[C@@H]2c2n1c1ccccc1c2CC3	VINCAMINE	1.49814
N#CCOC(=O)[C@@]1(OC(=O)C2C(C2(C)C)(C)C)[C@H](C)C[C@@H]2[C@]1(C)C[C@H](O)[C@]1([C@H]2C[C@@H](C2=CC(=O)C=C[C@]12C)F)F	GSK-870086	1.49614
OC(=O)C=c1[nH]n(Cc2nc3c(s2)ccc(c3)C(F)(F)F)c(=O)c2c1cccc2	Zopolrestat	1.49592
CCOc1ccc(cc1)CC1NC(=O)CCSSCC(NC(=O)C(NC(=O)C(NC(=O)C(NC1=O)C(CC)C)CCC(=O)N)CC(=O)N)C(=O)N1CCCC1C(=O)NC(C(=O)NCC(=O)N)CC(C)C	deamino-ethyl-oxytocin	1.49474
OCC(=O)C12OC(O[C@@H]1C[C@@H]1C2(C)C[C@H](O)[C@H]2[C@H]1C[C@@H](C1=CC(=O)C=CC21C)F)(C)C	Flunisolide	1.49347
COc1cc(C=Cc2ccc(c(c2)O)OC)cc(c1OC)OC	Combretastatin A-4	1.49286
O=C(c1ccc(cc1)Cl)NC1CN2CCC1CC2	PNU 282987	1.49243
S=C(NNC(=C)c1ccccn1)NNC(=S)Nc1ccccc1Cl	348U87	1.49081
CCCCCCCCCCCCCCC[C@H]([C@@H](NC(=O)C)CO)O	Cedefingol	1.48798
CCCc1ccc(c(=O)n1CC(=O)NCc1ccc(nc1C)N)NS(=O)(=O)Cc1ccccc1	L-375052	1.48796
Fc1ccc(cc1)C(=O)N1CCC(CC1)C(=O)N1CCC(CC1)N1Cc2c(C1=O)cccc2		1.48747
CC[C@@]1(O)C(=O)OCc2c1cc1c3nc4ccc(cc4c(c3Cn1c2=O)CC)O	7-Ethyl-10-hydroxycamptothecin	1.48689
OC(c1ccccc1)C(=O)OC1CC2CCC(C1)[N+]2(C)CC(=O)c1ccccc1	PHENACTROPINIUM CHLORIDE	1.48442
O[C@@H]1CC[C@@H](O)[C@H](O)C[C@H](O)C[C@]2(O)C[C@H](O)[C@H]([C@@H](O2)C[C@H](/C=C/C=C/C=C/C=C/C=C/C=C/C=C/[C@@H]([C@H]([C@H]([C@@H](OC(=O)C[C@@H](C1)O)C)C)O)C)O[C@@H]1O[C@H](C)[C@H]([C@@H]([C@@H]1O)N)O)C(=O)O	Amphotericin B	1.48225
CCCCCC(CC(=O)CCc1ccc(c(c1)OC)O)O	6-Gingerol	1.48189
COc1cc(/C=N/NC(=O)CSc2cc(C)nc3c2cccc3)cc(c1OC)OC		1.48112
CC1COC(CN1)c1cccc(c1)C(F)(F)F		1.47739
OC(=O)Cc1c(C)n(c2c1cccn2)Cc1ccc(cc1C(F)(F)F)S(=O)(=O)C	Fevipiprant	1.47655
C[N+](CCCCCC[N+](C)(C)C)(C)C	HEXAMETHONIUM BROMIDE	1.47363
CC(=O)O[C@@H]1C[C@@H]2[C@]([C@@]1(O)C(=O)COC(=O)C)(C)C[C@@H]([C@]1([C@H]2CCC2=CC(=O)C=C[C@]12C)F)O	triamcinolone acetate, Foamix	1.47346
O=C(C(c1ccccc1)C1CCCCC1)OCC[S+](C)C	HEXASONIUM IODIDE	1.47216
OC(Cn1ccnc1[N+](=O)[O-])CN1CCCCC1	Pimonidazole	1.47168
CCCc1c(OCCCS(=O)(=O)c2ccc(cc2)C(=O)CCC(=O)O)ccc(c1O)C(=O)C	L 648051	1.47009
CCCCCCC(c1cc(O)c2c(c1)OC([C@H]1[C@H]2C[C@H](O)CC1)(C)C)(C)C	CANBISOL	1.4682
OC(=O)C(c1ccc(cc1)N1Cc2c(C1=O)cccc2)C	Indoprofen	1.46738
OC(=O)c1cccc2c1Nc1cc(ccc1S2)C(F)(F)F	FLUTIAZIN	1.46657
COc1cccc(c1)C(CNC(C)C)O	FENALCOMINE HYDROCHLORIDE	1.46586
CC1CC(OC(=O)C(c2ccccc2)OC(=O)c2cccnc2)CC(C1)(C)C	Micinicate	1.46569
Cl[Mn-5]1234(Cl)[NH+]5CC[NH+]1[C@H]1[C@H]([NH+]2Cc2[n+]4c(C[NH+]3[C@H]3[C@H]5CCCC3)ccc2)CCCC1	Imisopasem manganese	1.46463
OC(=O)Cn1c(=O)c2cccc3c2c(c1=O)ccc3	alrestatin	1.46365
O[C@@H]1CCN(C1)c1ncc(cc1c1nncc1)C(=O)Nc1ccc(cc1)OC(Cl)(F)F	ABL-001	1.46204
CN1C2CCC1CC(C2)OC(=O)c1c[nH]c2c1cccc2	Tropisetron Hydrochloride	1.46054
[O-]C(=O)[C@@]1(C)CSC(=N1)c1ncccc1O	DESFERRITHIOCIN	1.46037
N#Cc1c(cccc1C(F)(F)F)Oc1cccc(c1)OS(=O)(=O)CCCC(F)(F)F	BAY-59-3074	1.4597
CCOc1ccc2c3c1O[C@@H]1[C@@]43CCN([C@H](C2)[C@@H]4C=C[C@@H]1O)C	Ethylmorphine	1.4552
C[C@H](NC(Cc1ccccc1)C)COc1ccccc1	RACEFEMINE	1.45492
O[C@@H]1C[C@H](N(C1)C(=O)c1cn(c2c1cccc2)C)C(=O)N[C@H](C(=O)N(Cc1ccccc1)C)Cc1ccc2c(c1)cccc2	FK-888	1.45469
S=C=NCCc1ccccc1	Phenethyl isothiocyanate	1.45415
COc1cc(C(C)C)c2c(c1)S(=O)(=O)N(C2=O)COC(=O)c1c(Cl)ccc(c1Cl)OCCN1CCOCC1	WIN 63759	1.45332
NCC(=O)N1CCC[C@H]1C(=O)NCC(=O)N	GPG-NH2	1.45091
OC(COc1ccc2c(c1)oc(cc2=O)C(=O)O)COc1ccc2c(c1)oc(cc2=O)C(=O)O	DISODIUM CROMPROXATE	1.44854
Fc1cnc(c(n1)C(=O)N)O	T705-18	1.44822
N=C(NC(=N)N)NCCc1ccccc1	PHENFORMIN	1.44659
OC[C@@]1(C#C)O[C@H](C[C@@H]1O)n1cnc2c1nc(F)nc2N		1.44657
OC[C@H]1O[C@@H](Oc2cc3c(O)cc(cc3[o+]c2c2ccc(c(c2)O)O)O)[C@@H]([C@H]([C@@H]1O)O)O	Cyanidin-3-glucoside	1.44508
O=C1CN(CCN1C1CCNCC1)C(=O)c1ccc2c(c1)OCO2		1.44436
CCCC1O[C@H]2[C@](O1)(C(=O)CO)[C@@]1([C@@H](C2)[C@@H]2CCC3=CC(=O)C=C[C@@]3([C@H]2[C@H](C1)O)C)C	Budesonide	1.44378
CC(COC(=O)c1ccc(cc1)N)C	ISOBUTAMBEN	1.44314
N#Cc1ccc(nc1)N(C(=O)c1ccn2c(c1)c(cn2)c1ccc(cc1)C(=O)N)C	KDU731	1.4431
CCn1nc2n(c1=O)n(Cc1ccc(nc1C)C(F)(F)F)c(=O)c(c2c1ccc(cc1)Cl)c1cnc(nc1)C	BMS-812204	1.44132
CCOc1ccc(cc1OCC)Cc1nccc2c1cc(OCC)c(c2)OCC	ETHAVERINE HYDROCHLORIDE	1.44101
CCO[C@H](COc1ccc(cc1)C(F)(F)F)CSc1ccc(c(c1)C)OCC(=O)O	MBX-8025	1.44015
O=C1CCCN1C1CCN(CC1)C(=O)c1ccccc1		1.4399
O[C@H]1CCN(C1)C(=O)Nc1cnn2c1nc(cc2)N1CCCC1c1cc(F)ccc1F	LOXO-101	1.43934
CCNCCCNCCCNCCCNCC	BENSPM	1.4391
CSCCC(C(=O)OCC(=O)Nc1ccccc1)NC(=O)COc1ccccc1		1.43641
Cc1c([C@H]2COC(=N2)N)cccc1F	RO-5263397	1.43626
O=C(c1ccc2c(c1)OCO2)N1CCC(CC1)N1Cc2c(C1=O)cccc2		1.43621
OC[C@H]1O[C@H](C[C@@H]1O)n1cc(Cl)c(nc1=O)N	Cytochlor	1.4349
Cc1ccc2c(c1)c(=O)cc(o2)c1cc(Br)ccc1O	NSD-721	1.43157
CCCn1c2nc([nH]c2c(=O)n(c1=O)CCC)C1CCCC1	CPX	1.43057
OC(=O)C(=O)Nc1cccc(c1)c1nnn[nH]1	acitazanolast	1.42969
O=C(NC1CCCC1)CNC(=O)c1ccc(cc1)c1cccc(c1)C(F)(F)F		1.42956
CC#C[C@H](c1ccc(cc1)OCC1=CCCC2(C1)CCCCC2)CC(=O)O	JTT-851	1.42944
CCCCOc1ccc(cc1)C(=O)OCCN(CC)CC	BUTOXYCAINE	1.42868
Clc1ccccc1COc1nccc2c1ncn2C	EMD-39609	1.42771
Oc1cc(CCNCCCCCCNCCc2ccccc2)ccc1O	DOPEXAMINE	1.42555
COc1ccccc1OC(=O)C(c1ccc(cc1)CC(C)C)C	methoxybutropate	1.42531
COc1ccccc1S(=O)(=O)Nc1cc(ccc1Oc1cc(F)c(cc1Cl)CC(=O)O)C(=O)NC(C)(C)C		1.42396
CCCc1ncc(c(n1)N)C[n+]1ccccc1C	AMPROLIUM	1.42396
COC1(CCOC(C1)C)/C=C/COCc1ccc2c(c1)ccc(=O)n2C	A 121798	1.42386
CCC(C(c1ccc(cc1)O)CC)C(c1ccc(cc1)O)C	BENZESTROL	1.42288
CCCCCCCCC(=O)NCc1ccc(c(c1)OC)O	NONIVAMIDE	1.4217
COc1ccc2c3c1O[C@@H]1[C@@]43CCN([C@H](C2)[C@@H]4CC[C@@H]1O)C	Dihydrocodeine Bitartrate	1.42135
CCOc1ccc(cc1)n1c(=C(N(C(=O)Cc2ccc(cc2)OC(F)(F)F)Cc2cccnc2)C)[nH]c2c(c1=O)cccn2	AMG-487	1.42071
O=C(Cn1c(Cl)cnc(c1=O)NCC(c1ccccn1)(F)F)NCc1ncccc1F	DPOC-4088	1.41989
CCCCCCCC/N=C/N1CCC(CC1)C(c1ccccc1)c1ccccc1	fenoctimine sulfate	1.41807
COc1cc(CNC(=O)c2cc(ccc2NC)[N+](=O)[O-])ccc1OC(F)F		1.41444
Clc1ccc(cc1)CS(=O)(=O)/C=C/c1ccc(cc1)C(=O)O	Recilisib	1.41413
OC(COc1ccc(cc1)CC(=O)N)CNC(C)C		1.41243
CC(C(=O)N1Cc2ccccc2CC2(C1)CCCCN2C)C		1.40809
CCn1cc(C(=O)O)c(=O)c2c1cc(N1CCN(CC1)C)c(c2)F	PEFLOXACIN MESYLATE	1.40801
CC(=O)O[C@H]1C[C@@H]2CC[C@@H]3[C@@H]([C@]2(C[C@@H]1[N+]1(C)CCCCC1)C)CC[C@]1([C@H]3C[C@@H]([C@@H]1OC(=O)C)[N+]1(C)CCCCC1)C	Pancuronium Br	1.40723
CCCOc1ccc2c(c1)sc(n2)NC(=O)OC	Tioxidazole	1.40711
O=C(C1CC1)NC1CCN(CC1)c1nc2c(o1)cccn2		1.40563
OC(=O)C(CCCC(C(=O)O)(Cl)Cl)(Cl)Cl		1.40513
CN(C(CN1c2ccccc2Sc2c1cccc2)C)C	Phenergan58-33-3	1.40329
O=C(Cc1c[nH]c2c1cccc2)NCCc1c[nH]c2c1cccc2		1.40026
O=C1CCC(C(=O)N1)N1C(=O)C2C(C1=O)CCC2		1.3994
C[C@H]([C@H]1C(=O)N2[C@@H]1SC(=C2C(=O)O)[C@H]1CCCO1)O	Faropenem sodium	1.39771
CCC(/N=C(/NC#N)\N[C@@H]1[C@@H](O)C(C)(C)Oc2c1cc(cc2)C#N)(C)C	U 89232	1.39739
CC(=O)NCC(=O)N1[C@H]2CC[C@@H]1c1c2ccc(c1)Nc1ncc(c(n1)NC1CCC1)C(F)(F)F	PF-03814735	1.39142
O1CCN(CC1)CCOc1ccc(cc1)[C@@H]1CC[C@@]2(CC1)OOC1(O2)C2CC3CC1CC(C2)C3	Artefenomel	1.38997
OC(=O)Cc1cc(n(c1C)c1ccc(cc1)Cl)C	clopirac	1.38977
Fc1ccc(c(c1)c1nnc2n1nc(OCc1ncnn1C)c(c2)C(C)(C)C)F	L-838417	1.3893
O=C(Cn1cnc2c1c(=O)n(C)c(=O)n2C)Nc1ccc(nn1)c1ccccc1	ETC-1922159	1.38851
COc1nccnc1N(S(=O)(=O)c1ccc(cc1)N)C(=O)C	ACETYL SULFAMETHOXYPYRAZINE	1.38828
CNCCCC12CCC(c3c1cccc3)c1c2cccc1	Maprotiline hydrochloride	1.38823
CN1CCC2(CC1)CC(NC(=O)Nc1cccc3c1cccc3)c1c(O2)cccc1		1.38781
N#Cc1cccc(c1)C1C=C(NC2=C1C(=O)CCC2)C(F)(F)F	AZD 0947	1.3875
CCC(C(c1ccccc1)C(=O)OCC[N+](CC)(CC)C)C	valethamate bromide, Essential	1.3873
CN1CCN(CC1)C1=Nc2ccccc2Nc2c1cc(cc2)OS(=O)(=O)C(F)(F)F	GMC 1169	1.38645
O=C(c1cc(Cl)c(c2c1OCCO2)N)NCC1CN2CCN1CC2	SL-65.0102	1.38498
Clc1ccc(cc1)S(=O)(=O)N(C1CCCCNC1=O)Cc1ccc(cc1)Br	ELN-318463	1.38478
OC(=O)Cn1c(=O)n(C)c2c(c1=O)n(C)cn2	1-THEOBROMINEACETIC ACID	1.38259
O=C(N1CCC(CC1)c1ccccc1)C1CCN(CC1)C(=O)C1CC1		1.38141
OCC(=O)[C@@]12OC(O[C@@H]1C[C@@H]1[C@]2(C)C[C@H](O)[C@H]2[C@H]1C[C@@H](C1=CC(=O)CC[C@]21C)F)(C)C	Flurandrenolide	1.38053
COc1ccc(cc1)CC(=O)N1Cc2ccccc2CC2(C1)CCN(CC2)C		1.37929
N#Cc1cc(cc(c1)Cl)Oc1cc(ccc1Cl)OCc1n[nH]c2c1ccc(n2)N	MK-4965	1.37643
CCC(c1ccc(cc1)CC(CN1C[C@H](C)O[C@@H](C1)C)C)(C)C	AMOROLFINE HYDROCHLORIDE	1.37615
Oc1ccc(cc1)[C@@H]1Cc2c([C@@H]1NC(=O)C(c1ccccc1)c1ccccc1)cccc2		1.37476
O=C(/C=C/c1cccnc1)NCCCCC1CCN(CC1)C(=O)c1ccccc1	Daporinad	1.37382
O=C1NCc2c(CC31CCCN3CC(C)(C)C)cccc2		1.37373
CCC(=O)N1Cc2ccccc2CC2(C1)CCCCN2CC		1.37276
Nc1ncc(cc1O[C@@H](c1c(Cl)ccc(c1Cl)F)C)c1cnn(c1)C1CCNCC1	crizotinib	1.37232
CCCCCCCC/C(=C\CCCCCCCC(=O)O)/[N+](=O)[O-]	CXA-10	1.3691
O=C(N[C@@H]([C@H](OC(C)(C)C)C)C(=O)OCc1ccccc1)OCc1ccccc1		1.36773
CO[C@H]1/C=C/O[C@@]2(C)Oc3c(C2=O)c2c(c(c3C)O)c(O)c(c3c2nc2n3ccc(c2)C)NC(=O)C(=C/C=C/[C@@H]([C@@H]([C@H]([C@H]([C@H]([C@@H]([C@@H]1C)OC(=O)C)C)O)C)O)C)C		1.36741
CN(CC(OC(=O)COc1ccc(cc1)Cl)CN(C)C)C	BCE 001	1.36449
COC(=O)N1CCC(CC1)CN1CCC(CC1)CNC(=O)c1cccc2c1nc([nH]2)C(C)C	TD-8954	1.36276
O=C(C1CN(C(=O)N1)c1ccc(cc1)F)NC1CC1		1.36265
CCOC(=O)C[C@@H](c1ccccc1)NC(=O)CN1C(=O)N[C@@](C1=O)(C)c1ccc(cc1)C(=N)N	HMR 1794	1.36191
Clc1ccc(cc1)Oc1ccc(cc1)OCc1cc(C)cc(=O)n1O	Rilopirox	1.36144
O=C(C(C)(C)C)NC1CCCN(C1)c1nc2c(o1)cccn2		1.36064
Ic1ccc2n(c1)cc(n2)c1ccccc1		1.36005
OC(=O)c1ccccc1c1ccc(cc1)C(F)(F)F	BW-207U	1.35958
O=C1N(C[C@@H]2c3c1cccc3CCC2)[C@@H]1CN2CCC1CC2	Palonosetron hydrochloride	1.35766
OC(COc1ccccc1C1CC2CC1CC2)CNC(C)C	BORNAPROLOL	1.35683
NC(=O)/N=N/C(=O)N	azodicarbonamide	1.35634
Cc1c(Nc2ncccc2C(=O)OCC(CO)O)cccc1Cl	CLONIXERIL	1.35583
CNc1sc2c(n1)c(Cc1cccnc1)c(c(c2C)O)C	E 3040	1.35385
N#Cc1ccc2c(c1)[C@@H](Oc1ccc(=O)[nH]n1)[C@@H](C(C2=O)(C)C)O	UR-8248	1.35308
O=C1CC[C@]2(C(=C1)C(=C[C@@H]1[C@@H]2CC[C@]2([C@H]1CC(=C)[C@]2(OC(=O)C)C(=O)C)C)C)C	Melengestrol acetate	1.35274
Clc1ccc(cc1)C(=O)N1CCC(CC1)n1c(=O)[nH]c2c1cccc2		1.35206
CNc1nc(N[C@H]2CCC[C@H](C2)C(=O)NCc2ccc(cc2C(F)(F)F)C#N)nc(n1)C	GSK2256294A	1.35076
CN(CCNC(=O)c1cccc2c1nc1ccccc1c2)C	SN-22995	1.34665
NC(=N)NCCCCCCCC(=O)N[C@H](C(=O)N[C@H](C(=O)O)Cc1ccccc1)CC(=O)O	SC 49992	1.34588
NCCS(=O)(=O)O	Taurine	1.34539
C=CC[C@@H]1/C=C(\C)/C[C@H](C)C[C@H](OC)[C@H]2O[C@](O)([C@@H](C[C@@H]2OC)C)C(=O)C(=O)N2[C@H](C(=O)O[C@@H]([C@@H]([C@H](CC1=O)O)C)/C(=C/[C@@H]1CC[C@H]([C@@H](C1)OC)O)/C)CCCC2	Tacrolimus (Fk506)	1.34485
COc1cc(nc(n1)C)NS(=O)(=O)c1ccc(cc1)N	SULFAMETHOMIDINE	1.34475
COc1ccc(cc1)N1CCN(CC1)C(=O)c1ccnc2c1cccc2		1.34341
Cc1cccc(c1)N1CCN(CC1)CCc1ccc2c(n1)cccc2	CENTHAQUINE	1.3427
O=C(c1ccc2n(c1)ccn2)NCCC1CCCCC1		1.34264
OC[C@H]1O[C@@H](Oc2c3cc4cc2Oc2ccc(cc2Cl)[C@@H](O)[C@@H]2NC(=O)[C@H](NC(=O)[C@@H]4NC(=O)[C@H](CC(=O)N)NC(=O)[C@@H]([C@@H](c4ccc(O3)c(Cl)c4)O)NC(=O)[C@@H](CC(C)C)N)c3ccc(c(c3)c3c(O)cc(cc3[C@H](NC2=O)C(=O)O)O)O)[C@@H]([C@H]([C@@H]1O)O)O[C@@H]1O[C@@H](C)[C@H]([C@@](C1)(C)N)O	Norvancomycin (hydrochloride)	1.3424
COC(=O)COc1cccc2c1c(C(=O)C(=O)N)c(n2Cc1ccccc1)CC	Varespladib methyl	1.34239
Nc1ccc(cc1)S(=O)(=O)Nc1ccccn1	SULFAPYRIDINE	1.34194
OC(=O)[C@H]1NC[C@@H](C1)Cc1cccc(c1)F	PF-2393296	1.34038
OC[C@@]1(O)C[C@@]23C[C@H]1CCC3[C@]1(C(CC2)c2ccoc2C=C1)C	Kahweol	1.33955
N#CC(c1c(Cl)cc(cc1Cl)n1ncc(=O)[nH]c1=O)c1ccc(cc1)F	Letrazuril	1.3382
O=C(OCC(=O)[C@@]1(O)CC[C@@H]2C1(C)C[C@H](O)[C@H]1[C@H]2CCC2=CC(=O)CCC12C)CCC1CCCC1	HYDROCORTISONE CYPIONATE	1.33786
CC(NCCn1c2ccc(cc2c2c1ccc(c2)C(=O)C)C(=O)C)C	CBL-0137	1.33552
COc1cc(C)ccc1OCC(=O)NC1(Cc2c(C1)cccc2)C(=O)O		1.33438
Clc1cccc(c1)B(c1ccc(c(c1)Cl)C)OC(=O)c1ncccc1O		1.33404
CC(Cc1ccc(cc1)O)N	HYDROXYAMPHETAMINE HYDROBROMIDE	1.33391
C1CC1CN1CCN(CC1)CC1CC1	INO-2628-CZ	1.33299
FC(OC(C(Cl)F)(F)F)F	enflurane	1.33121
CNC(=O)N1CC(C1)Oc1cccc(c1)C(F)(F)F	FLUZINAMIDE	1.32986
C[N+]1(CCCCC[N+]2(C)CCCC2)CCCC1	PENTOLINIUM TARTRATE	1.32841
Oc1cc(O)c2c(c1)[o+]c(c(c2)O[C@@H]1O[C@H](CO[C@@H]2O[C@@H](C)[C@@H]([C@H]([C@H]2O)O)O)[C@H]([C@@H]([C@H]1O)O)O)c1ccc(c(c1)O)O		1.32721
CC(=O)C(=O)[O-]	Sodium pyruvate	1.32577
O=C(C(CNC(=O)c1ccccc1)C)OCC(=O)C12OC(O[C@@H]1C[C@@H]1C2(C)C[C@H](O)[C@]2([C@H]1CCC1=CC(=O)C=CC21C)F)(C)C	Triamcinolone benetonide	1.32551
CCN1CCCC1CNC(=O)c1cc(ccc1OC)S(=O)(=O)CC	itanoxone	1.32428
CN1CCN(CC1)C[C@@H]1C(=O)Nc2c(S[C@@H]1c1ccccc1)cccc2	BTM-1042	1.3226
COc1nc(C)ccc1CN1CC1C#N	ciamexon	1.32143
[N-]=[N+]=N[C@H]1C[C@@H](O[C@@H]1COP(=O)O)n1cc(C)c(=O)[nH]c1=O		1.32122
Nc1nc(=O)c2c([nH]1)n(CCC(CO)O)cn2	buciclovir	1.32107
N#CCCN1C(=O)C(O)N=C(c2c1ccc(c2)Cl)c1ccccc1F	cinolazepam	1.32004
O=C(Cc1ccc(cn1)c1ccc(cc1)OCCN1CCOCC1)NCc1ccccc1	KX2-391	1.31752
Nc1nnc(c(n1)N)c1cccc(c1Cl)Cl	lamotrigine	1.31596
Fc1ccc(cc1)C(=O)N1CCCC(C1)C(=O)N1CCC(CC1)N1CCCC1=O		1.31519
CNC1CN(C1)c1c(F)cc2c(c1Br)n(cc(c2=O)C(=O)O)c1nc(N)c(cc1F)F	WQ 2743	1.31482
CC(=O)NC(c1cccc(c1)F)CCN1[C@@H]2CC[C@H]1C[C@H](C2)n1c(C)nc2c1CN(CC2)C(=O)C(C)C	PF-232798	1.31337
Cn1ncc(c1)c1cnc2c(c1)c(=O)c1cc(ccc1cc2)CS(=O)(=O)NCc1ccccn1	MK-8033	1.31168
COc1cc(Cc2cnc(nc2N)N)c2c(c1OC)oc(c2)Cc1c([nH]c2c1cc(Cl)cc2)C(=O)N(C)C	AR-709	1.31161
Fc1cccc(c1)c1nc2c(n1C)nc(nc2N)C#CC1(O)CCCC1	E-3210	1.3111
COc1ccc(cc1F)c1c(Cl)ncn1c1ccc(cc1)S(=O)(=O)N	Cimicoxib	1.31085
O=c1n(c2ccccc2)c2ncccc2c2c1nc[nH]2	KF 17625	1.31033
[O-]C(=O)CCC(=O)OCC(=O)[C@@]1(O)CC[C@@H]2[C@]1(C)C[C@H](O)[C@H]1[C@H]2CCC2=CC(=O)CC[C@]12C	HYDROCORTISONE 21-HEMISUCCINATE SODIUM	1.30908
CCCc1cc(ccc1OC(C(=O)NS(=O)(=O)c1ccc(cc1)C(C)C)c1ccc2c(c1)OCO2)C(=O)O	L-754142	1.30749
COc1ccc2c(c1)nc([nH]2)S(=O)Cc1ncc(c(c1C)OC)C		1.30617
COC(c1ccc(cc1)[N+](=O)[O-])CN1CCC(CC1)C(=O)c1ccc(cc1)F		1.30607
Nc1ccn(c(=O)n1)[C@H]1CO[C@H](S1)CO	Pharmaprojects No. 4701	1.3059
CC(=O)O[C@H]1C[C@@H]2CC[C@@H]3[C@@H]([C@]2(C[C@@H]1N1CCCCC1)C)CC[C@]1([C@H]3C[C@@H]([C@@H]1OC(=O)C)[N+]1(C)CCCCC1)C	VECURONIUM BROMIDE	1.30543
CNC(=O)c1c(oc2c1cc(OC(C)C)c(c2)NS(=O)(=O)C)c1ccc(cc1)F	HCV-086	1.30444
COc1ccc(cc1OC1CCCC1)CC1CNC(=O)N1	GYKI-13380	1.30431
OC[C@H]1OC(O)C[C@H]([C@@H]1O)O	2-Deoxyglucose	1.30351
Cc1cccc(n1)C(=O)Nc1nnn[nH]1	TA-5707	1.30342
CCOC(=O)c1cnc2c(c1O)cc(c(c2)OCC(C)C)OCC(C)C	4-HYDROXY-6,7-DIISOBUTOXY-QUINOLINE-3-CARBOXYLIC ACID ETHYL ESTER	1.30263
O=C(c1c[nH]c2c1cccn2)NCCC1CCCCC1		1.30249
OC1CCN(C1)CCCN1c2ccccc2Sc2c1cc(cc2)C(F)(F)F	E-0663	1.30174
C=C[C@]1(C)C[C@@H](OC(=O)CSc2cccc(c2)CO)[C@]2(C)C(C)CCC3([C@H]([C@@H]1O)C)C2C(=O)CC3	BC-7013	1.3014
CC(=O)O[C@@]1(CC[C@@H]2[C@]1(C)CC[C@H]1[C@H]2C=C(C2=CC(=O)[C@H]3[C@@H]([C@]12C)C3)Cl)C(=O)C	cyproterone acetate, Barr	1.30103
OC(=O)C1Oc2c(C1)c1onc(c1cc2Cl)c1ccccc1	AA 193	1.3004
NC1=NCC2N1c1ccccc1Cc1c2cccc1	epinastine, BI, nasal	1.30032
O=C([C@H]1CCCC[C@H]1C(=O)O)O[C@H]1CCC2(C(C1(C)C)CCC1([C@@H]2C(=O)C=C2[C@@]1(C)CCC1([C@@H]2C[C@](C)(CC1)C(=O)O)C)C)C	Cicloxolone	1.29835
Oc1ccc2c(c1)OC(C(=C2C)c1ccc(cc1)O)c1ccc(cc1)OCCN1CCCCC1	ACOLBIFENE	1.29617
Clc1ccc(cc1)c1nn2c(n1)c1ccccc1cc2	Lotrifen	1.29427
COc1cc2c(cc1OCCCN1CCCCC1)ncnc2N1CCN(CC1)C(=O)Nc1ccc(cc1)OC(C)C	tandutinib	1.29409
CCC(=O)OC1(C#C)CC2C(C1)(C)C1CCC3(C(C1CC2)CCC3(C#C)OC(=O)CC)C	Anordrin	1.29368
[Na]Cl	SODIUM CHLORIDE	1.29314
Cc1[nH]cnc1CC1CCc2n(C1=O)c1ccccc1c2C	FABESETRON	1.29245
O=C1CC[C@]2(C(=C1)[C@@H](C)C[C@@H]1C2CC[C@]2(C1CC[C@]2(OC(=O)C)C(=O)C)C)C	Diviseq	1.28903
CN1CCC(CC1)C(=O)N1Cc2ccccc2CC2(C1)CCCN2C		1.28782
CC(N(C(=O)C)CCC(c1ccccc1Cl)(C(=O)N)CCN1CCCCC1)C	BIDISOMIDE	1.28772
NCC(=O)N1CCC2(CC1)C(=O)NCN2C(=O)NC(C)C		1.28648
O=C1N(Cc2c1cccc2)C1CCN(CC1)CC1CCCCC1		1.28648
COc1ccc(cc1Nc1cccc(n1)N(c1ccc2c(c1)[nH]nc2C)C)S(=O)(=O)CC	analog of GW-654652	1.28638
NC(=N)c1cc2c(s1)cc(cc2)OC(=O)c1cccs1	BCX-1470	1.28216
OC[C@H]1O[C@@H](OC(=O)[C@@]23CCC(C[C@H]3C3=CCC4[C@@]([C@@]3(C[C@@H]2O)C)(C)CCC2[C@]4(C)CC[C@@H](C2(C)C)O)(C)C)[C@@H]([C@H]([C@@H]1O)O)O		1.28164
N=C(c1cccs1)Nc1ccc(cc1)N1CCN(CC1)C(=O)[C@]1(C)CCc2c(O1)c(C)c(c(c2C)O)C	BN 80933	1.28155
NC(=NC(=O)c1ccc2c(c1)N(C(C)C)C(=O)C(O2)(C)C)N		1.28028
CN1CCN(CC1)c1ncc(c(n1)N)c1cc(Cl)cc(c1Cl)Cl	Sipatrigine	1.27997
OC(=O)C(OCc1nn(c2c1cccc2)Cc1ccccc1)(C)C	Bindarit	1.27957
C1CCN(CC1)CCC(c1ccccc1)c1ccccc1	FENPIPRANE	1.2789
CO[C@H]1COCC[C@H]1N[C@@H]1CC[C@](C1)(C(C)C)C(=O)N1C[C@@H]2C[C@H]1CN2c1ncnc(c1)C(F)(F)F	PF-04634817	1.27862
C[n+]1cccc(c1)OC(=O)N(CCCCCCN(C(=O)Oc1ccc[n+](c1)C)C)C	DISTIGMINE BROMIDE	1.27845
O=C(c1cccnc1)O[C@@H]1[C@@H](COC(=O)c2cccnc2)O[C@]([C@H]1OC(=O)c1cccnc1)(O)COC(=O)c1cccnc1	NICOFURANOSE	1.27767
O[C@@H](c1ccccc1)[C@@H](N)C	Cathine hydrochloride	1.27621
[O-]C(=O)[C@@H]1N2C(=O)[C@H]([C@H]2SC1(C)C)NC(=O)c1c(C)onc1c1ccccc1Cl	CLOXACILLIN SODIUM	1.27578
NC(=O)CS(=O)C(c1ccccc1)c1ccccc1		1.27562
C=CCN1CCN(CC1)C(c1ccccc1)c1ccccc1	Aligeron	1.275
CCC(=O)OC(C[N+](C)(C)C)CC(=O)O	propionyl L-carnitine, Sigma	1.27435
CCOc1ccccc1C(=O)O	2-ethoxybenzoic acid	1.27409
CCc1ccc(cc1)C1=CC(C)(C)Sc2c1cc(C#Cc1ccc(cc1)C(=O)O)cc2	AGN-194310	1.27359
CN1CCN(CC1)C1Cc2cc(Cl)ccc2Sc2c1cccc2		1.27263
C1CCCC(=NCC1)N/C(=N\c1ccccc1)/N1CCOCC1	CGI-13744D	1.27127
C=CCN1C(=O)OC(C1=O)C	ALOXIDONE	1.27014
O=C(c1nn(c(c1)c1cnc2c(c1)cccc2)C)NCCN1CCOCC1	RQ-00310941	1.26921
O[C@@H]1CC[C@H](CC1)Nc1cc(ccc1C(=O)N)n1nc(c2c1CC(C)(C)CC2=O)C(F)(F)F		1.26775
Clc1ccc2c(c1)C(=NCC(=O)N2C)c1ccccc1		1.26598
O=C(NC1CCSC1=O)CSCC(=O)O	erdosteine	1.26499
C[Si](O[Si](C)(C)C)(O[Si](C)(C)C)C	dimethicone, Applied Biology	1.26492
C=CCn1c(=O)c2c(n1c1cccc(n1)C(O)(C)C)nc(nc2)Nc1ccc(cc1)N1CCN(CC1)C	MK-1775	1.26482
SC[C@@H](C(=O)N[C@H](C(=O)N[C@H](C(=O)O)CO)CC(=O)O)NC(=O)[C@H](C(C)C)NC(=O)[C@@H]1CCCN1C(=O)[C@@H](NC(=O)[C@@H](NC(=O)CNC(=O)[C@@H](NC(=O)[C@H](CC(=O)N)N)CC(C)C)CCC(=O)O)Cc1ncnc1	ADESH	1.26327
CCOC1c2ccccc2C(=O)N(c2c1cccc2)C	etazepine	1.26311
OC(C(S(=O)(=O)C)(C)C)(c1ccc(cc1)C(F)(F)F)Cn1ncnc1	SSY-726	1.26141
OC(=O)CCC(Sc1ccc(cc1)C(=O)O)/C=C\Cc1ccc(cc1)OCCCCOc1ccccc1	Bay-x-7195	1.26013
CCCc1ccc(c(=O)n1CC(=O)NCc1cccc(c1)OC)NS(=O)(=O)Cc1ccccc1		1.25774
C[C@H]1SC[C@]2(O1)CN1CC[C@H]2CC1	cevimeline hydrochloride	1.25683
O[C@@H]1[C@@H](O)[C@H](Oc2ccc3c(c2)CC[C@@H]2[C@@H]3CC[C@]3([C@H]2CC[C@@H]3O)C)O[C@@H]([C@H]1O)C(=O)[O-]	Estradiol glucoside	1.25642
CC(=O)NC1CCCN(C1)c1nc2c(o1)cccn2		1.2551
CCCNC(=O)c1cnc2n1CCc1c(C32CCNCC3)cccc1		1.25447
CON(C(=O)/C=C/1\OC(OC1=O)(C)C)Cc1ccc(cc1)F	BMS-538158	1.25383
CCC(C(=O)C(=O)N1CCCCC1C(=O)OC(c1cccc(c1)OCC(=O)Nc1c(/N=N/c2ccc(cc2)c2ccc(cc2)/N=N/c2cc(c3c(c2N)cccc3)S(=O)(=O)O)cc(c2c1cccc2)S(=O)(=O)O)CCc1ccc(c(c1)OC)OC)(C)C	SLF-CR	1.25254
OC[C@@H](Oc1cc(Oc2ccc(cc2)S(=O)(=O)C)cc(c1)C(=O)Nc1ccn(n1)C)C	AZD-6370	1.25221
CCCCc1nc(cn1c1ccc(cc1)Oc1ccc(cc1)Cl)c1ccc(cc1)OCCCN(CC)CC	Azeliragon	1.25164
N#Cc1cc2cnc(nc2n(c1=O)C1CCCC1)Nc1ccc(cc1)N1CCN(CC1)C	ON123300	1.25157
ONS(=O)(=O)c1cccc(c1)S(=O)(=O)C	CXL-1427	1.25132
Clc1cccc(c1)CN1C2CCC1CN(C2)C(=O)c1ccncc1		1.25097
Fc1c(F)cccc1Br	AC-2307	1.25085
OCC(N(C)C)(Cc1ccc(c(c1)Cl)Cl)C	CERICLAMINE	1.25048
CC(C(=O)O)CN(c1c(I)cc(c(c1I)N)I)C(=O)C	IOCETAMIC ACID	1.24741
CN1CCN(CC1)CCCn1c(C)ncc1[N+](=O)[O-]	CR-929	1.2459
OC(=O)c1cccc(c1)COc1ccc2c(c1)occ(c2=O)c1ccc(cc1)NS(=O)(=O)C	GS-6673	1.24474
COCc1c(ncc2c1c1c(cccc1n2)OCc1ccccc1)C(=O)OCC	ZK 91296	1.24249
CN[C@@H]1CC[C@H](c2c1cccc2)c1ccccc1	TAMETRALINE	1.23967
OC(=O)COCCN1CCN(CC1)C(c1ccc(cc1)Cl)c1ccccc1	Cetirizine83881-51-0	1.23951
O=C(C12C3C4C2C2(C1C3C4C12OCCO1)Br)NCCCOc1cccc(c1)CN1CCCCC1	SWR 104SA	1.23946
Cc1nn(c(c1)C)CCCCCSc1nc(c([nH]1)c1ccccc1)c1ccccc1	RP-70676	1.23905
NC(=O)NCCN1CCN(CC1)c1cccc(c1)C(F)(F)F	fluprazine	1.23854
COC(=O)C1=C(CF)NC(=C(C1c1c(F)ccc(c1C(F)(F)F)Cl)C(=O)OC(C)C)C	FPL 62129	1.23842
NCCCCNCCCN[C@H]1CC[C@]2([C@H](C1)C[C@H]([C@@H]1[C@@H]2CC[C@]2([C@H]1CC[C@@H]2[C@@H](CC[C@H](C(C)C)OS(=O)(=O)O)C)C)O)C	SQUALAMINE	1.23765
OCCN1CCN(CC1)CC/C=C/1\c2ccccc2Sc2c1cc(Cl)cc2	ZUCLOPENTHIXOL	1.23744
OC(=O)CN1CCN(CCN(CCN(CC1)CC(=O)O)CC(=O)O)CC(=O)O	Gadoteric acid	1.23555
CCN1C[C@@]2(CCC(C34[C@@H]1C(CC23)[C@@]1(O)CC(C2CC4[C@]1(O)[C@H]2OC)OC)OC)OC(=O)c1ccccc1NC(=O)C	Lappaconitine	1.23495
CCCN1CCCCC21CN(Cc1c(C2)cccc1)C(=O)CCCC(=O)O		1.23457
CNCC(c1cccc(c1)C(F)(F)F)OC	FLUDOREX	1.23404
CCCC(=O)N1CCCN(CC1)c1nc(N)c2c(n1)cc(c(c2)OC)OC	bunazosin ER	1.23231
CC[N+](CCC(c1ccccc1)(c1ccccc1)C(=O)N)(C)C	AMBUTONIUM BROMIDE	1.23157
NCC1CN(C/C/1=N/OC)c1nc2c(cc1F)c(=O)c(cn2C1CC1)C(=O)O	Gemifloxacin mesilate	1.22914
COc1ccc(cc1OC)CCNCCC(=O)N1CCCSc2c1cccc2	KT 362	1.22888
OCCOc1ccc(cc1)CNC(CO)(C)C		1.22774
Fc1ccc(c(c1)F)C(OP(=O)(O)O)(Cn1cncn1)Cn1cncn1	fosfluconazole	1.2271
O[C@H]1C[C@H](O)C(=C)/C(=C\C=C\2/CCC[C@]3([C@H]2CC[C@@H]3[C@@H](OCCC(O)(C)C)C)C)/C1	maxacalcitol	1.2263
O=C1NC2(CCN(CC2)CC2CCCCC2)Oc2c1cccc2		1.22482
OC(=O)c1cc(cc2c1nc(n2Cc1cccc(c1C)C(F)(F)F)C)N1CCOCC1	GSK-2636771	1.22315
CCn1cc(C(=O)O)c(=O)c2c1cc(Cl)cc2		1.22196
OC[C@@H]1CC[C@@H](O1)n1cc(I)c(=O)[nH]c1=O		1.22134
Clc1ccc(cc1)NNC(=N)c1ccccc1		1.22043
N#Cc1cccc(c1)C(=O)c1cnn(c1N)c1cc(ccc1C)C(=O)NC1CC1	BCT-197	1.21967
O=C1SCC(=O)N1Cc1ccc2c(c1)/C(=C/c1[nH]cc(c1)CN1CCOCC1)/C(=O)N2	(no name)	1.21959
Fc1c(F)ccc2c1CSc1c([C@H]2N2[C@@H]3COCCN3C(=O)c3n2ccc(=O)c3O)cccc1	Baloxavir	1.21872
N#Cc1cc(cc(c1)Cl)Oc1c(=O)n(ccc1C(F)(F)F)Cc1n[nH]c(=O)n1C		1.21854
Clc1ccc(cc1)NC(=O)c1cc(Br)ccc1O	BROMOSALICYLCHLORANILIDE	1.21788
O[C@@H](CN(Cc1ccc2c(n1)cccc2)C)COc1ccc(cc1)NS(=O)(=O)C	WAY 123223	1.21721
CCOC(=O)C1=C(C)NC(=C(C1C)C(=O)OCCN1C(=O)c2c(S1(=O)=O)cccc2)C	Trombodipine	1.21664
CN(C[C@H]1CCCC[C@]1(O)c1cccc(c1)O)C	O-Desmethyltramadol	1.21585
CCc1ccccc1CN1CCCCC21Cc1ccccc1CNC2=O		1.21545
ONC(=O)C1(CCOCC1)CS(=O)(=O)c1ccc(cc1)Oc1ccc(cc1)Cl	transplant therapy, Conatus Pharmaceuticals	1.21479
CCCOC(c1ccccc1)(c1ccccc1)C(=O)OC1CCN(CC1)C	propiverine hydrochloride	1.21388
CC(=O)CCCCN1C(=O)C2N(C)C=NC2N(C1=O)C		1.21352
O=C(C(c1cc(cc(c1)C(F)(F)F)C(F)(F)F)(C)C)N(c1cnc(nc1c1ccccc1C)NC1CCCCC1)C		1.21327
OC[C@@H](NC(=O)[C@@H](N(C(=O)CNC(=O)[C@H](NC(=O)[C@H](Cc1ccc(cc1)O)N)C)C)Cc1ccccc1)CCS(=O)C	FK-33-824	1.21243
COc1cccc(c1)CN1CCC(CC1)N1CCCNC1=O		1.21169
COC(=O)N[C@H](C(=O)N1CCC[C@H]1c1[nH]cc(n1)c1ccc2c(c1)ccc(c2)c1ccc2c(c1)nc([nH]2)[C@@H]1CCCN1C(=O)[C@H](C(C)C)NC(=O)OC)C(C)C	Ravidasvir	1.21069
CC(Oc1nnc(c1)n1cnc2c1nc(cc2)N[C@H](c1ncc(cn1)F)C)C	AZD-7451	1.21016
CCCCCCCC/C=C\CCCCCCCC(=O)OCC(CO)O	2,3-Dihydroxypropyl oleate	1.20941
O=c1cc(C)c2c(o1)ccc(c2)NC(=O)C(=O)O	CGP-13143	1.20656
NCCC(=O)NCCSSCCNC(=O)CCN		1.20591
O1CCc2c(C1)c1nc([nH]c1cn2)c1nocc1	S-8510	1.20354
OCC(CCl)(CCl)CO	LOPRODIOL	1.20328
O=C(C(S(=O)(=O)[O-])c1ccccc1)N[C@@H]1C(=O)N2[C@@H]1SC([C@@H]2C(=O)[O-])(C)C	sulbenicillin	1.20291
Fc1ccc(cc1)C[Si](CN1CCCCC1)(C)C	Silperisone hydrochloride	1.20263
Cc1ccc2c(c1)nc(o2)NC(c1ccccn1)CC1CCCCC1	ontazolast	1.20214
Clc1cc(N)cc(c1N=C1NCCN1)Cl	Pharmaprojects No. 1758	1.20122
CCCCCCCC/C=C\CCCCCCCC(=O)OC(COC(=O)CCCCCCC/C=C\CCCCCCCC)COC(=O)CCCCCCC/C=C\CCCCCCCC		1.20104
C[C@H]([C@H]1C(=O)N2[C@@H]1[C@@H](C)C(=C2C(=O)O)S[C@@H]1CN[C@@H](C1)C(=O)N(C)C)O	MEROPENEM	1.19993
O=C(N1CCN(CC1)Cc1ccc2c(c1)OC(O2)(F)F)Nc1cnccc1Cl	JNJ-42165279	1.19986
COc1c2oc(=O)ccc2cc2c1occ2	Methoxsalen298-81-7	1.19792
O=C(C(N1CCN(CC1)c1ccc(cn1)C(F)(F)F)(C)C)NC1C2CC3CC1CC(C2)(C3)C(=O)N	ABT-384	1.1979
O=C([C@@H]1[C@H](C1(C)C)C=C(Cl)Cl)OCc1c(F)c(F)c(c(c1F)F)F	Fenfluthrin	1.19619
COc1ccc(cc1)CN1CCC(CC1)N1Cc2c(C1=O)cccc2		1.19236
OC(CNC(CNC(=O)N)(C)C)COC(=O)c1ccccc1F	FLESTOLOL	1.19189
O=[V+2]	Vanadyl sulfate	1.19023
OC[C@H]([C@H]1O[Sb](=O)(O[C@H]([C@H]1O)C(=O)O)O[Sb]1(=O)O[C@H]([C@@H](CO)O)[C@@H]([C@@H](O1)C(=O)O)O)O	Sodium stibogluconate	1.18975
CC(=O)O[Hg]c1cc(ccc1O)C(CC(C)(C)C)(C)C	ACETOMEROCTOL	1.18889
CNCCCC1(OC(c2c1cccc2)(C)C)c1ccccc1	talopram	1.18857
O=C1CC[C@]2(C(=C1)C(=C[C@@H]1[C@@H]2CC[C@]2([C@H]1CC[C@]2(C)C(=O)C)C)C)C	MEDROGESTONE	1.18833
COc1cc2c(cc1OC)N[C@@H]([C@@H]2CCN1CCN(CC1)c1ccccc1)C	CL-77328	1.18704
OC(=O)CCC(C(=O)O)CP(=O)(O)O	GPI-16072	1.18394
CC(n1c(=O)c2c(ncn2c2c1cccc2)c1noc(n1)C1CC1)C	PANADIPLON	1.18286
CN(C1CC(c2c1cccc2)c1ccccc1)C	DIMEFADANE	1.18088
CCCCCCCCCCCCCCCC(=O)OC[C@@H]([C@H]1OC(=O)C(=O)C1O)O		1.17959
O=C(N[C@@H]1C(=O)N2[C@@H]1SCC(=C2C(=O)O)CSc1nnnn1C)CSC(F)(F)F	Cefazaflur	1.17959
CCCC(=O)N1Cc2ccccc2CC2(C1)CCCN2Cc1ccc(cc1)OC		1.17891
CCC(c1ccccc1)C(=O)NC(=O)N	PHENETURIDE	1.17777
OC(COc1cccc2c1cc([nH]2)C)CNC(C)C	mepindolol	1.17733
COC(=O)C1(CC1)OC(=O)c1cncn1[C@@H](c1ccccc1)C	Cyclopropyl-methoxycarbonyl metomidate	1.17649
CNS(=O)(=O)CC1CCC(CC1)N(c1ncnc2c1cc[nH]2)C	Oclacitinib	1.17641
CCCc1ccc(c(=O)n1CC(=O)NCc1cccc(c1)C)NS(=O)(=O)Cc1ccccc1		1.1759
O=Cc1c(cccc1O)OCc1cccnc1c1ccnn1C(C)C	GTx-011	1.17408
NCCc1ccc(cc1)O	TYRAMINE	1.17408
COc1ccc2c(c1)c(CCN(C(C)C)C(C)C)cn2	5-MeO-DIPT	1.17334
CN1C(=O)CC(C1=O)(C)c1ccccc1	Methsuximide	1.17212
CNC1CCc2c(C1)scn2	ETRABAMINE	1.17189
COC(=O)C1=C(C)NC(=C(C1c1cccc(c1)[N+](=O)[O-])C(=O)OC(CN(CCC(c1ccccc1)c1ccccc1)C)(C)C)C	Lercanidipine Hydrochloride	1.17053
COCC1=C(C(=O)O)N2[C@H](SC1)[C@@H](C2=O)NC(=O)/C(=N\O)/c1csc(n1)N	CEFDALOXIME	1.17045
O=C1c2ncccc2c2c(C1=O)nccc2	phanqui, Gerolymatos	1.16922
[O-]C(=O)C	calcium acetate	1.16877
CCN(CCN1c2cc(cc(c2[C@](C1=O)(O)c1ccccc1Cl)C(F)(F)F)C(=O)N)CC	PH-CBR-2016-001-HVAC-11062-0	1.16733
Clc1ccc(cc1)S(=O)(=O)NCCCCN(S(=O)(=O)c1ccccc1C(=O)O)Cc1cccc(c1)OCc1scc(n1)C(C)C	KP-496	1.16729
CC(=CCOc1cc(ccc1Cl)NC(=S)c1ccsc1C)C	UC 82	1.1659
CC(=O)OCC(=O)[C@@]1(O)CC[C@@H]2[C@]1(C)C[C@H](O)[C@]1([C@H]2CCC2=CC(=O)CC[C@]12C)F	dexamethasone acetate, Laboratoires CTRS	1.1646
O=C(N1CCN(C[C@H]1Cc1c[nH]c2c1cccc2)Cc1n[nH]nc1CN1CCOCC1)c1cc(cc(c1)C(F)(F)F)C(F)(F)F	SLV-317	1.1641
CCCCCCc1[nH]c2c(n1)n1[C@H]3CCC[C@H]3N=c1n(c2=O)C	SCH 59498	1.16225
CCN(CCCC(Nc1c2cc(OC)ccc2nc2c1ccc(c2)Cl)C)CC		1.16093
COc1cc2CCN3[C@H](c2cc1O)Cc1c(C3)c(OC)c(cc1)O	(-)-Stepholidine	1.16073
CCCCCCCCCCCCC(c1ccccc1)(CCCN(CCc1ccccc1)C)C#N	RONIPAMIL	1.16015
NC(=O)CCC(C(=O)O)NC(=O)C	ACEGLUTAMIDE ALUMINUM	1.15754
Nc1cccc(c1C)Cn1ccc(cc1=O)OCCc1cccs1	CG-400549	1.15661
CCOc1ccc(cc1)NC(=O)CC(O)C	BUCETIN	1.15554
N#Cc1ccc(cc1)CN1CC(C1)Oc1ccc(c(c1)C)F		1.15541
CC(OC(=O)C(=C1SCS1)C(=O)Nc1scc(n1)C)C	mivotilate	1.15402
O=C1CCCCCCCCCCCCCCO1	Conrex Permeation Enhancer-215	1.15381
COc1cccc(c1)c1ccc(cc1)CN1CCCC(C1)NC(=O)c1ccccc1		1.15373
O=S1(=O)CCN(CC1)Cc1cc(NCC2CCOCC2)c2c(c1)cc([nH]2)c1ccccc1	Necrosis Inhibitor-5	1.15323
COc1nc(CNC(=O)c2cc(cnc2c2ccccn2)c2cncc(c2)Cl)ccc1OC	MK-1064	1.15051
CCc1cc(O)c(cc1F)Oc1ccc(cc1F)C(=O)N	MUT-056399	1.14985
C=CCn1c2nc([nH]c2c(=O)n(c1=O)CC=C)C1CCCCC1	DAX	1.14979
O(CCOCC1OC1)CCOCC1OC1		1.14928
CN1CCN(CC1)C(=O)Cc1csc(n1)NS(=O)(=O)c1cccc(c1C)Cl	BVT-2733	1.14888
[O-][N+](=O)c1cn2c(n1)OC[C@H](C2)OCc1ccc(nc1)c1ccc(cc1)OC(F)(F)F	TBA-354	1.14888
Clc1cc2OCCOc2c(c1)N1CCN(CC1)CCCCN1C(=O)c2c(S1(=O)=O)cccc2	DU 125530	1.14882
OC(=O)c1ccc(cc1)C#Cc1ccc2c(c1)C(C)(C)CCC2(C)C	EC-23	1.14877
OC(=O)CCSC(c1cccc(c1)/C=C/c1ccc2c(n1)cc(cc2)Cl)SCCC(=O)N(C)C	PCA 4248	1.14863
OC[C@H]1O[C@H](C[C@@H]1O)n1cnc2c1NC=NC[C@H]2O	pentostatin	1.14701
Nc1ccc2c(c1)nc(n2C(C)C)N1CCNCC1		1.14643
Fc1ccc(cc1)C(=O)CC1CCN(C1)CCOc1cccc2c1OCCO2	S 16924	1.1456
Fc1c(CNc2ccc(c(c2)C(=O)O)O)c(F)c(c(c1F)C(F)(F)F)F	Neu2000	1.14539
CCCC(c1ccc(cc1)CC(C)C)Oc1ccc(cc1)C(=O)c1cc(n2c1cccc2)CCCC(=O)O	FR-146687	1.14515
COc1cc(/N=N/c2c(O)c3c(NC(=O)c4cccc(c4Cl)Cl)cc(cc3cc2S(=O)(=O)[O-])S(=O)(=O)[O-])c(cc1/N=N/c1c(O)c2c(NC(=O)c3ccc(cc3Cl)Cl)cc(cc2cc1S(=O)(=O)[O-])S(=O)(=O)[O-])OC	FP-21399	1.14229
N#Cc1ccc(cc1)Cc1cc(c2n1cccc2)C(=O)C(=O)Nc1snc(c1)C	STA 5312	1.14122
O=C(N([C@@H]1CC[C@@]2(C[C@H]1N1CCCC1)CCCO2)C)Cc1ccccc1	U-69593	1.14081
CCOc1cc(OCC)c(cc1C(=O)CCC(=O)O)OCC	trepibutone	1.14067
O=c1n([nH]cc1n1ccnn1)c1ncnc(c1)N1CCOCC1	molidustat	1.14045
CN1CCN(CC1)CCCN1c2ccccc2Sc2c1cc(cc2)C(F)(F)F		1.13948
NCCCC[C@H](C(=O)N[C@@H](C(=O)O)CO)N	TCMP-80	1.13944
COC(=O)C(NC(=O)C(CC(C)C)N)CC(C)C	Leucylleucine methyl ester	1.13924
CCOC(=O)C1(CCN(CC1)C)c1cccc(c1)O	Hydroxypethidine	1.13917
C#C[C@]1(O)CC[C@@H]2[C@]1(C)CC[C@H]1[C@H]2CCc2c1ccc(c2)O	ETHYNYLESTRADIOL57-63-6	1.1377
Clc1ccc(cc1)CCC(Sc1c(Cl)cccc1Cl)Cn1cncc1	butoconazole	1.13661
Oc1ccc(cc1)CN1CCCC21Cc1ccccc1CNC2=O		1.13469
CN1CCN(CC1)C1=Nc2cc(Cl)ccc2Nc2c1cccc2		1.13423
N=C1SCC[C@@](N1)(C)c1cc(c2cncnc2)c(cc1F)F	LY2811376	1.13366
O=C(C(CNC(=O)c1ccccc1)C)OCC(=O)C12OC(O[C@@H]1C[C@@H]1C2(C)C[C@H](O)[C@]2([C@H]1CCC1=CC(=O)C=CC21C)F)c1ccc(cc1)N(C)C	TBI-PAB	1.13311
CC(NC(=O)COc1cccc(c1)c1nc(Nc2ccc3c(c2)cn[nH]3)c2c(n1)cccc2)C	KD-025	1.13299
OB([C@@H](NC(=O)[C@H]([C@H](O)C)NC(=O)c1cccc(n1)c1ccccc1)CC(C)C)O	delanzomib	1.13248
CN1CCC2=C(C1)c1ccccc1Cc1c2cccc1	setiptiline	1.1321
COC[C@@H](Oc1cc(Oc2cnc(cn2)C(=O)N2CCC2)cc(c1)C(=O)Nc1ccc(cc1)OC)C		1.13194
O=C(c1ccccc1C(=O)O)N1CSCC1	Nesosteine sodium	1.13165
O=C(OC12CCN(CC1)CC2)Nc1ccccc1c1ccccc1	YM 46303	1.13023
CC1(C)CC1(C)C	1,1,2,2-Tetramethylcyclopropane	1.12858
CC(=O)O[C@@]1(CC[C@@H]2[C@]1(C)C[C@H](c1ccc(cc1)N(C)C)C1=C3CCC(=O)C=C3CC[C@@H]21)C(=O)C	ulipristal acetate	1.12794
CCN(CCCNc1nccc2c1c(C)c1c(c2C)nc2c1cc(OC)cc2)CC	RETELLIPTINE	1.12605
OC(=O)CCCCCc1c(c2cccnc2)n(c2c1cc(Cl)cc2)C	CGS 15435A	1.12572
CC(=O)N[C@@H]1CN(C(=O)C1)c1ccc(cc1)OCc1cccc(c1)F	Sembragiline	1.12398
CCOCCN1CCC(CC1)(OC(=O)CC)c1ccccc1	Prosidol	1.12247
COc1cc(NC(CCCNC2=C(CCO2)C(=O)C)C)c2c(c1)cccn2	CDRI-80-53	1.12152
CN(CCCCCCCCSc1nc(ccc1C(=O)c1cccs1)C(C)C)C	Y 29794	1.12102
CC(=O)NCCC(=O)N1Cc2ccccc2CC2(C1)CCCN2CC1CCNCC1		1.11947
OC(=O)C1(CCCC1)c1ccc2c(c1)OC[C@H]([C@@H]2O)Cc1ccc(cc1)c1ccccc1	CP-105696	1.11843
CCNC1(CCCCC1=O)c1cccs1	TILETAMINE HYDROCHLORIDE	1.11829
COc1ccc(cc1c1cc(=O)[nH]c(=S)n1CC(=O)N)Cl	PF-06282999	1.11804
O=C1CCC2(C(=C1)CCC1C2CCC2(C1CC[C@]2(O)C(=O)C)C)C	HYDROXYPROGESTERONE	1.11736
OC(=O)COc1ccc(cc1)Cl	metformin chlorphenoxyacetate	1.11722
C=C[C@]1(C)C[C@@H](O)[C@]2(C)C(C)CCC3([C@H]([C@@H]1O)C)C2C(=O)CC3		1.11608
CC(C12CCC(OO1)(C=C2)C)C	ASCARIDOLE	1.11579
OC1(CCC(CC1)CCN1CCN(CC1)c1ccccn1)c1cccs1	PD 136121	1.11571
COC(=O)C1=C(C)NC(=C(C1c1ccccc1)C(=O)OCCN1CCN(CC1)C(c1ccccc1)c1ccccc1)C	analog of manidipine	1.11412
Clc1ccc2c(c1)N(CCCN1CCC3(CC1)SCC(=O)N3)c1c(S2)cccc1	CLOSPIRAZINE	1.11402
COC(=O)c1cnc2n1CCc1c(C2=C2CCN(CC2)CCc2ccc(cc2)OCc2ccc3c(n2)cccc3)cccc1	[11C]Laniquidar	1.11288
FCC(Cn1cnc2c1ncnc2N)O		1.11232
Oc1ccc(cc1)NC(=O)c1ccccc1O	N-Salicoylaminophenol	1.1115
OCC(CS)S	Dimercaprol	1.11122
O=C1O[C@H](CN1c1ccc(c(c1)F)c1ccc(nc1)c1nnn(n1)C)COP(=O)(O)[O-]	Tedizolid phosphate sodium	1.11099
OC([C@@H]1C[C@H]1c1ccncc1)(c1ccccc1)c1ccccc1	CYPROLIDOL	1.11084
CC[N+](CCSC1=CC(=Nc2c(N1)cccc2)c1ccc(cc1)Sc1ccccc1)(CC)C	Tibenzonium	1.10989
NCCCC[C@@H](C(=O)N[C@H](C(=O)N[C@H](C(=O)N[C@H](C(=O)N)[C@H](O)C)Cc1ccccc1)[C@H](O)C)NC(=O)[C@@H](Cc1c[nH]c2c1cccc2)NC(=O)[C@@H](NC(=O)[C@@H](NC(=O)[C@@H](Cc1ccccc1)N)Cc1ccccc1)Cc1ccccc1	BIM-23052	1.10923
COc1ccc(cc1C(CNC(=O)CN)O)OC	Pro-Amatine3092-17-9	1.10911
CCCOc1nc(N)c2c(n1)n(cn2)C1CCCCC1	BB-1502	1.10896
O=C1CC2CCCC(C1)N2C(=O)c1cccc(c1)Cl		1.10795
FC(c1ccc2c(c1)N(CCCN1CCN(CC1)C13CC4CC(C3)CC(C1)C4)c1c(S2)cccc1)(F)F		1.10712
Clc1cc(ccc1C(=O)N1C[C@H]2COCCN2Cc2c1cccc2)NC(=O)c1ccccc1c1ccccc1	RWJ-351647	1.10702
OC(=O)CCC(=O)C(=O)O	2-Ketoglutaric acid	1.10663
CC(=CCC[C@]([C@H]1CC[C@@]2([C@@H]1[C@H](O)C[C@H]1[C@@]2(C)C[C@@H]([C@@H]2[C@]1(C)CC[C@@H](C2(C)C)O)O)C)(O)C)C	Protopanaxatriol	1.10624
CNC(=O)NC(C(Cl)(Cl)Cl)O	MECLORALUREA	1.10324
CCOC(=O)C1(CCC=CC1N(C)C)c1ccccc1	tilidine	1.1026
COc1cc2c(cc1OC)ncnc2n1nc(nc1N)c1ccccn1	CP-466722	1.1025
CCC(C(COC(=O)N)(COC(=O)NC(C)C)C)C	NISOBAMATE	1.1018
CCCC1N(CC)C2c3c1cccc3c1c(C2)ccc(c1O)O	CI-201678	1.10064
FCC(Cn1cnc2c1ncnc2N)OCP(=O)(OC(C)C)O		1.10025
CCOc1ccc(cc1)CN1CCCCC21Cc1ccccc1CNC2=O		1.09991
CCCC(=O)NCc1ccc(cc1)C(F)(F)F		1.09946
CN(C(=O)NC1CC2(CCN(CC2)C(=O)c2ccc3c(c2)cc[nH]3)Oc2c1cccc2)C		1.09942
[O-]S(=S)(=O)[O-]	POTASH SULFURATED	1.09862
COc1nc(C)nc(c1NC1=NCCN1)Cl	MOXONIDINE HCl75438-57-2	1.09807
CCC(C(=O)O[C@@H]1C[C@H]2CC[C@@H](C1)N2C)Sc1ccccc1		1.09786
CCCN(n1cc(c2c1cccc2)C)c1ccncc1F	NERISPIRDINE HYDROCHLORIDE	1.09726
CC(C(C)(C)C)N/C(=N/C#N)/Nc1ccncc1	Pinacidil monohydrate	1.09688
CCCCCCCCCCCC(=O)OCC([C@H]1OC[C@@H]([C@H]1O)O)O	SORBITAN MONOLAURATE	1.09638
OC(=O)C[C@@H]1CC[C@H](CC1)c1ccc(cc1)N1CCOc2c(C1=O)c(N)ncn2	PF-04620110	1.09618
CCc1cc(Nc2scc(n2)c2ccc(c(c2)F)n2cnc(c2)C)c(cc1C)C	NGP-555	1.09607
OC(COc1cc(C)ccc1Cl)CNC(C)(C)C	Bupranolol	1.09494
OC(=O)[C@@H]1N2C(=O)C[C@H]2S(=O)(=O)[C@@]1(C)Cn1ccnn1	Tazobactam	1.09469
COc1ccc2c(c1)[C@]1(CC1c1ccc3c(c1)[nH]nc3/C=C/c1ccc(cc1)CN1C[C@H](C)O[C@@H](C1)C)C(=O)N2	CFI-400945	1.09407
OC(=O)CCCC(=O)N1Cc2ccccc2CC2(C1)CCCN2Cc1ccccc1		1.09381
Fc1ccc(cc1)C(=O)C1CCN(CC1)CCc1c(C)nc2n(c1=O)cccc2		1.09261
Clc1ccc(cc1)c1cc(cc(c1O)CNC(C)(C)C)Nc1ccnc2c1ccc(c2)Cl	tebuquine	1.09204
Clc1ccc2c(c1)N(CCCN1CCC(CC1)(C(=O)N)N1CCCCC1)c1ccccc1CC2	CLOCAPRAMINE	1.09192
NC(=O)NS(=O)(=O)c1ccc(cc1)N	SULFANILYLUREA	1.09185
COCCOC(=O)C1=C(C)NC(=C(C1c1cccc(c1)[N+](=O)[O-])C(=O)OC/C=C/c1ccccc1)C	cilnidipine	1.09174
N[C@@H]1CCCCN(C1)c1c(F)cc2c(c1Cl)n(cc(c2=O)C(=O)O)C1CC1	besifloxacin hydrochloride	1.09108
O=C1CCC(=NN1)c1ccc(cc1)N		1.09063
OC(=O)[C@@H]1N2C(=O)[C@H]([C@H]2SC1(C)C)N1C(=O)[C@H](NC1(C)C)c1ccccc1	HETACILLIN	1.08955
COc1ccccc1n1cc(nc1c1ccccc1OC)Nc1ccccc1	MC-5	1.08853
OCC(NCc1ccc2c(c1)c1cccc3c1c2ccc3)(CO)C		1.08833
CO/N=C/1\CN([C@@H](C1)C(=O)NC[C@H](c1ccccc1)O)C(=O)c1ccc(cc1)c1ccccc1C		1.0874
COc1cc(O)cc(c1C(=O)c1c(O)cc(cc1O)C)C(=O)OC	SULOCHRIN	1.08738
COc1cccc(c1)S(=O)(=O)N1CCCC1C(=O)N1CCC(CC1)N1CCCC1=O		1.08532
CCCCN(CCCC)CCNc1onc(n1)c1ccccc1	Butalamine	1.085
CCC(SSc1ncc[nH]1)C	PX-12	1.08309
ClCCCN1CCN(CC1)c1ccc2c(n1)cccc2	AAL-13	1.08136
O[C@@H](CNC(Cc1ccc(cc1)Oc1ccc(cn1)C(=O)N)(C)C)COc1cccc2c1c1ccccc1[nH]2	LY 377604	1.08126
OC1CCC(O)C(O)CC(O)CC2(O)CC(O)C(C(O2)CC(/C=C/C=C/C=C/C=C/C=C/C=C\C=C\C(C(C(C(OC(=O)CC(C1)O)C)C)O)C)OC1OC(C)C(C(C1O)N)O)C(=O)O	amphotericin-B	1.08044
Cc1ccc(cc1)S(=O)(=O)NC(=O)N1CCC(CC1)N1CCC(CC1)Oc1ccc(c(c1)Cl)Cl	AZD-3778	1.08002
Clc1cc(NCCN2CCCC2)c(c(c1)N1CCN(CC1)c1ncnc2c1c(Br)n[nH]2)C		1.07974
Brc1cc2c(s1)n1c(CN=C2c2ccccc2Cl)nnc1C1CCCCC1	CICLOTIZOLAM	1.07762
O=C(C1CCCN1Cc1ccc(cc1)c1cc(C)cc(c1)C)NCc1ccc(cc1)C(F)(F)F		1.07737
COc1cccc(c1)S(=O)(=O)N1CC(C1)N(c1ccccc1C)C		1.07695
COC(=O)C(NC(=O)Cc1c2cc(OC)ccc2n(c1C)C(=O)c1ccc(cc1)Cl)C		1.07684
CC(C(c1ccccc1)O)N(CC=C1c2ccccc2CCc2c1cccc2)C	TRECADRINE	1.07634
N#CN/C(=N/c1ccc(cc1)C1=NNC(=O)CC1C)/NC	Siguazodan	1.0758
CCC(=C(c1ccc(cc1)OP(=O)(O)O)c1ccc(cc1)OCCN(C)C)c1ccc(cc1)C(C)C	Miproxifene phosphate	1.07579
COc1ccc(cc1OC1CCCC1)Cn1c(C)nc2c1nc(Cl)nc2C	MT-810	1.07557
C/C(=C\CC/C=C(/CC/C=C(/CCC=C(C)C)\C)\C)/CC/C=C(/CCC=C(C)C)\C	Squalene	1.0754
Clc1cc2[nH]cc(c2cc1c1ccc(cc1)C1(O)CCC1)C(=O)O	PF-06409577	1.07499
O=C1NCCN1C1CCN(CC1)CC[C@H]1COc2c(O1)cccc2	azaloxan	1.07401
CCCCCCCC(=O)OCCCC		1.07379
COc1nc(nc(c1Oc1ccccc1OC)NS(=O)(=O)c1ccc(cn1)C)c1ccncc1	Avosentan	1.07322
OC[C@@]1(O)C[C@@]23C[C@H]1CC[C@H]3[C@]1([C@H](CC2)c2ccoc2CC1)C		1.07313
O[C@H]1C[C@H](O)C(=C)/C(=C\C=C\2/CCC[C@]3([C@H]2CC[C@@H]3[C@@H](CCCC(O)(C)C)C)C)/C1	CALCITRIOL	1.07264
CC(=O)NC[C@H]1OC(=O)N(C1)c1ccc(c(c1)F)N(S(=O)(=O)C)C	VRC-3522	1.07245
CN1C=C(C(=O)N)C(=O)N2C1CCCC2C	CHINOIN 127	1.07062
O=C1NC(=N)OC1c1ccccc1	Pemoline	1.07053
CC(=O)N(C/C=C/c1cccc(c1)Oc1ccccc1)O	BW-A4C	1.06916
CCC1(Cc2c(O1)cccc2)C1=NCCN1	EFAROXAN HYDROCHLORIDE	1.06845
CN1CCN(CC1)c1nc2ccccc2c(n1)C1=C(C(=O)NC1=O)c1c[nH]c2c1cccc2	Sotrastaurin	1.06842
Fc1ccc2c(c1)[C@H](OCc1c(F)cccc1F)[C@H](S2)Cn1ccnc1		1.06734
O=C(Cc1ccccc1)NC1CCC(=O)NC1=O	antineoplaston A10	1.06507
CC(CCC[C@H]([C@H]1CC[C@@H]2[C@]1(C)CC[C@H]1[C@H]2CC=C2[C@]1(C)CC[C@@H](C2)OS(=O)(=O)O)C)C		1.06434
Clc1ccc(cc1)c1ccc(cc1)C(=O)CC(=C)C(=O)O	levonantradol	1.06358
CN1CCN(CC1)C[C@@H]1C(=O)Nc2c(S[C@@H]1c1ccccc1)cccc2	BTM-1042	1.06283
CCCCC[C@@H](/C=C/[C@H]1[C@H](O)CC(=O)[C@@H]1C/C=C\CCCC(=O)O)O	Prostaglandin E2	1.06267
CCC[C@]1(OCCc2c1[nH]c1c2c(C#N)ccc1C)CC(=O)O	HCV-371	1.06212
CCOC(=O)c1ncn2c1CN(C)C(=O)c1c2ccc(c1)F		1.06164
OCCNCCn1c2c3ccccc3C(=O)c2c2c(c1=O)cccc2	oracin	1.06135
O=C1CC[C@]2(C(=C1)CC[C@@H]1[C@@H]2CC[C@]2([C@H]1CC[C@@H]2C(=O)C)C)C	Progesterone	1.06121
CNCc1ccc(cc1)NC(=O)c1c[nH]c2c1C(=O)CCC2	NGD-91-1	1.06113
O=C(NC(=O)c1ccccc1OCC1CC1)N[C@@H]1C[C@@H]2CC[C@H](C1)N2C	WAY 100289	1.0611
CN(CCCN1c2ccccc2Sc2c1cc(Cl)cc2)C	Chlorpromazine69-09-0	1.06107
CCOC(=O)c1ccc2c(c1)NCc1c(O2)c(OC)ccc1		1.06097
OC[C@H]1O[C@H](C[C@@H]1N=[N+]=[N-])n1ccc(=O)[nH]c1=O	Navuridine	1.0603
CCCc1c(OCCCOc2ccc(c(c2CC2CC2)OC)C(=O)NC)ccc2c1OC(CCC(=O)O)CC2	SC 53228	1.06001
O[C@H]1C[C@H](O)C(=C)/C(=C\C=C\2/CCC[C@]3([C@H]2CC[C@@H]3[C@@H](/C=C/[C@@H](C(C)C)C)C)C)/C1	Doxercalciferol	1.05982
CCC(=O)Oc1ccc2c(c1)CC[C@@H]1[C@@H]2CC[C@]2([C@H]1CC[C@@H]2OC(=O)CC)C	ESTRADIOL DIPROPIONATE	1.05978
CCOc1ccc2c(c1)c(ccn2)[C@H]([C@@H]1CC2CCN1C[C@@H]2CC)O	ETHYLHYDROCUPREINE	1.05965
Nc1sc(c2c1CNCC2)N		1.05753
CCCc1nc2c(n1Cc1ccc(cc1)c1ccccc1C(=O)O)cc(cc2C)c1nc2c(n1C)cccc2		1.05738
O=C(C1CCCN1C(=O)c1ccccc1)N1CCC(CC1)N1CCOCC1=O		1.0573
CN1Cc2ccccc2[C@@H]2[C@H]1Cc1c[nH]c3c1c2ccc3	CY-208-243	1.05627
N#CC(=CC=Cc1ccc(c(c1)O)O)C(=O)NCc1ccccc1	AEG-41174	1.05605
C[C@@H]1CN(CCN1C)c1cnc(nc1Nc1cc(n(n1)C)C)Nc1nc(C)c(c(c1)C1CC1)F	MMV-253	1.05474
Fc1ccc(cc1)Oc1ccc2c(c1)O[C@H](CO2)CN(C(=O)N)O	CGS 25997	1.0537
Clc1ccc(c(c1)c1cc(c2n1CCCC2)C(=O)N(c1ccc2c(c1)ccn2C)c1ccc(cc1)O)C(=O)N1Cc2ccccc2C[C@H]1CN1CCOCC1	BCL-201	1.05176
[truncated: 11,598 more rows]

## Sheet: 2 uM screen
2 µM ReFRAME screen hits
Compound SMILES	Compound Name	Z score
ONC(=O)c1cnc(nc1)N1CCN(CC1)S(=O)(=O)c1ccc2c(c1)cccc2	JNJ-16241199	112.587
O=C(c1ccc(cc1)CNc1nccc(n1)c1cccnc1)Nc1ccccc1N	mocetinostat	47.6236
ONC(=O)c1cnc(nc1)N1C[C@@H]2[C@H](C1)[C@H]2NCc1ccc2c(n1)ccc(c2)F	CHR-3996	42.5075
ONC(=O)/C=C/c1ccc(cc1)CNCCc1c(C)[nH]c2c1cccc2	Panobinostat lactate	27.0219
COc1ccc(cn1)NC(=O)c1nnc2c1cc(cc2)c1cncc(c1)CN1CCC(C1)(F)F	SM-04690	26.5468
OCCN(Cc1ccc(cc1)/C=C/C(=O)NO)CCc1c[nH]c2c1cccc2	LAQ 824	26.1606
ONC(=O)c1cnc(nc1)N1CCC(CC1)CNCc1cn(c2c1cccc2)C	quisinostat	25.4041
C/C=C(\C(=O)O[C@H]1C(=C[C@]23[C@]1(O)[C@H](O)C(=C[C@H](C3=O)[C@H]1[C@@H](C[C@H]2C)C1(C)C)CO)C)/C	Ingenol mebutate	24.9487
ONC(=O)CCCCCCC(=O)Nc1ccccc1	vorinostat	24.6194
CCCCc1nc2c(n1CCN(CC)CC)ccc(c2)/C=C/C(=O)NO	pracinostat	23.7619
CC(CC(=O)Nc1cncc(c1)c1ccc2c(c1)c(n[nH]2)c1nc2c([nH]1)cncc2c1cccc(c1)F)C	SM04646	22.6769
CCN(Cc1ccc2c(c1)ccc(c2)COC(=O)Nc1ccc(cc1)C(=O)NO)CC	Givinostat hydrochloride	21.6919
ONC(=O)c1ccc(cc1)NC(=O)[C@H](c1ccccc1)C(C)C	AR-42	21.4407
ONC(=O)CCCC/C=C(/C(=O)NCCCN(C)C)\COc1cccc2c1cccc2	CG-200745	21.4067
CCn1c(nc2c1c(OC[C@H]1CCCNC1)cnc2C#CC(O)(C)C)c1nonc1N	GSK-690693	20.9549
C[n+]1cc2c3OCOc3ccc2c2c1c1cc3OCOc3cc1cc2	Sanguinarium chloride	19.7667
O=C(OCc1cccnc1)NCc1ccc(cc1)C(=O)Nc1ccccc1N	entinostat	18.6066
ONC(=O)CCCCCCOc1cc2c(ncnc2cc1OC)Nc1cccc(c1)C#C	CUDC-101	18.3514
CC[C@H]([C@H]1O[C@]2(C=C[C@H]([C@@]3(O2)CC[C@@](O3)(C)[C@H]2CC[C@]([C@@H](O2)C)(O)CC)O)[C@@H](C[C@@H]1C)C)C(=O)[C@H]([C@H]([C@@H]([C@@H]1O[C@H]([C@H](C[C@@H]1C)C)[C@H](C(=O)O)CC)C)O)C	Narasin	17.07
ONC(=O)c1cnc(nc1)N(Cc1cc2c(s1)c(nc(n2)c1ccc(nc1)OC)N1CCOCC1)C	CUDC-907	16.9299
ONC(=O)/C=C/c1ccn(c1)S(=O)(=O)c1ccc(cc1)CN(C)C	resminostat	16.9137
ONC(=O)c1ccc(cc1)C#CCNC(=O)c1cc2c([nH]1)ccc(c2)OCCN(C)C	CRA-026440	16.5002
NC1CCN(C1)c1c(F)cc2c3c1oc1ccccc1n3cc(c2=O)C(=O)O	A-83669	16.4075
CC(=O)Nc1ccc(cc1)C(=O)Nc1ccccc1N	Tacedinaline	16.3645
O=C(/C=C/c1cccnc1)NCc1ccc(cc1)C(=O)Nc1cc(F)ccc1N	Chidamide	16.1397
NC(=O)c1cnc2c(c1N[C@@H]1[C@H]3CC4C[C@@H]1C[C@@](C3)(C4)O)cc[nH]2	peficitinib	14.5334
Clc1c[nH]c2c1cccc2NS(=O)(=O)c1ccc(cc1)S(=O)(=O)N	indisulam	14.5078
COc1cc(ccc1O)CC(=O)OCC1=C[C@H]2[C@H]3O[C@]4(O[C@]2([C@H]2[C@@](C1)(O)C(=O)C(=C2)C)[C@@H](C[C@@]3(O4)C(=C)C)C)Cc1ccccc1	Resiniferatoxin	14.3464
ONC(=O)CCCCCCNC(=O)c1cnc(nc1)N(c1ccccc1)c1ccccc1	ricolinostat	14.0389
CCSCc1ccc2c(c1)c1c3C(=O)NCc3c3c4c1n2[C@H]1C[C@]([C@](O1)(n4c1c3cc(cc1)CSCC)C)(O)C(=O)OC	CEP-1347	13.9055
CCCCCCCCCCCCCC(=O)O[C@@H]1[C@@H](C)[C@@]2(O)[C@H]([C@H]3[C@]1(OC(=O)C)C3(C)C)C=C(C[C@]1([C@H]2C=C(C1=O)C)O)CO	Phorbol 12-myristate 13-acetate	13.738
CCN1CCC(CC1)Nc1ccc2c(c1)/C(=C(\c1[nH]cc(n1)C)/c1cccc(c1)F)/C(=O)N2	XL-999	13.4791
NC[C@@](c1ccc(cc1)Cl)(c1ccc(cc1)c1c[nH]nc1)O	AT-13148	12.6028
CCS(=O)(=O)Nc1ccc(c(c1)c1cn(C)c(=O)c2c1cc[nH]2)Oc1ccc(cc1F)F	ABBV-075	12.4147
C/C=C/1\NC(=O)[C@H]2CSSCC/C=C/[C@@H](OC(=O)[C@@H](NC1=O)C(C)C)CC(=O)N[C@@H](C(=O)N2)C(C)C	romidepsin	12.2982
O[C@H]1CCC2(C(=CCC3C2CCC2(C3CC=C2)C)C1)C	analog of aloradine	12.0744
COc1c(OC)cc2c(c1OC)c1ccc(c(=O)cc1[C@H](CC2)NC(=O)C)OC	colchicine	11.9921
COC(=O)Nc1nc2c([nH]1)cc(cc2)C(=O)c1cccs1	nocodazole	11.9162
CCCCc1ccc2c(c1)nc([nH]2)NC(=O)OC	PARBENDAZOLE	11.6864
NC(=O)c1cnc2c(c1NC1[C@@H]3CC4C[C@H]1C[C@](C3)(C4)O)cc[nH]2	peficitinib	11.5642
CCS(=O)(=O)N1CCN(CC1)c1ccc(cc1)Nc1ncc(c(n1)NC1CC1)C(=O)N	Cerdulatinib	11.181
O=C(C[C@@H]1N=C(c2ccc(cc2)Cl)c2c(n3c1nnc3C)sc(c2C)C)Nc1ccc(cc1)O	OTX-015	11.0879
COc1ccc2c(c1OP(=O)(OCc1ccccc1)OCc1ccccc1)c(O)cc(n2)c1cccc(c1)F	TRX-818	10.8757
Nc1ccc2c(c1)[n+](C)c1c(c2)ccc(c1)N.Nc1ccc2c(c1)nc1c(c2)ccc(c1)N	Acriflavine	10.7259
COc1ccc2c(c1)cc([nH]2)C(=O)c1ccccc1	D-64131	10.6666
O=c1nc2c(n1)c(cc(c2)c1c(C)noc1C)c1c(nnc1C1CC1)C1CC1	GS-5829	10.637
N#C/N=C(/Nc1ccncc1)\NCCCCCCOc1ccc(cc1)Cl	CHS-828	10.2497
COC(=O)Nc1nc2c(n1)ccc(c2)Sc1ccc(cc1)NC(=O)[C@@H](N)C	DENIBULIN	9.79269
ONC(=O)/C=C/c1cccc(c1)S(=O)(=O)Nc1ccccc1	belinostat	9.72633
O=c1[nH]/c(=C\c2nc[nH]c2C(C)(C)C)/c(=O)[nH]/c/1=C\c1ccccc1	plinabulin	9.68436
ONC(=O)c1ccc(cc1)OCCNC(=O)c1oc2c(c1CN(C)C)cccc2	abexinostat	9.6561
OC[C@H]1O[C@H]([C@@H]([C@@H]1O)O)n1ccc2c1ncnc2N	TUBERCIDIN	9.61695
COc1cc(F)ccc1c1ncnc(n1)Nc1cccc(c1)CS(=O)(=N)C	BAY-1143572	9.43326
CCCCCCCCCC(=O)O[C@H]1CC[C@@H]2[C@]1(C)CC[C@H]1[C@H]2CCC2=CC(=O)CC[C@]12C		9.35945
O[C@H]1C[C@@H](C[C@H]1COS(=O)(=O)N)n1ccc2c1ncnc2N[C@H]1CCc2c1cccc2	Pevonedistat	9.30758
CCOC(=O)Nc1ccc(cc1)SCC1CO[C@](O1)(Cn1cncc1)c1ccc(cc1Cl)Cl	tubulozole	9.19986
ONC(=O)c1ccc(cc1)C1=Nc2ccccc2Oc2c1cccc2	EVP-0334	9.19657
COc1ccc(cc1)C(=O)/C(=C(/c1ccc2c(c1)OCO2)\C(=O)O)/Cc1cc(OC)c(c(c1)OC)OC	PD-156707	9.18232
COc1ccc(c(c1)c1ccc(nc1N)NC(=O)c1ccnn1C)Cl	PF-04531083	9.12477
COc1ccc(cc1)N(c1nc(C)nc2c1cccc2)C	verubulin	9.04898
ONC(=O)CCCCCCNC(=O)c1cnc(nc1)N(c1ccccc1Cl)c1ccccc1	Citarinostat	9.04641
CCCCc1cc2ccccc2c(n1)OCCN(C)C	DIMETHISOQUIN	9.02691
COc1c(OC)cc2c(c1OC)c1ccc(c(=O)cc1C(CC2)N)OC	(R/S)-N-Deacetyl Colchicine	8.97718
Oc1cc2O[C@H](c3cc(O)c(c(c3)O)O)[C@H](C(=O)c2c(c1)O)O	Dihydromyricetin	8.84329
OC(=O)COc1cccc(c1)CCc1nc(c(o1)c1ccccc1)c1ccccc1	BMY 42393	8.84129
COc1ccc2c(n1)c(Nc1cc(CN3CCCC3)c(c(c1)CN1CCCC1)O)c1c(n2)cc(cc1)Cl	pyronaridine	8.66362
CCCCc1cc(c(n1Cc1ccc(cc1)c1ccccc1c1nnn[nH]1)C=O)CC(C)C	CR-3834	8.50997
OC[C@H]1O[C@H]([C@@H]([C@@H]1O)O)n1cnc(nc1=O)N	5-Azacytidine	8.50888
CCOCCOC(=O)/C=C/c1ccc(cc1)OC	CINOXATE	8.01921
N[C@H]1CCCC[C@H]1Nc1ncc(c(n1)Nc1cccc(c1)n1nccn1)C(=O)N	PRT-062607	7.98775
OC(=O)Cn1c(cc2c1cccc2)C(=O)Nc1scc(n1)c1ccccc1Cl	LINTITRIPT	7.87749
O=C(Cc1ccc(cn1)c1ccc(cc1)N1CCOCC1)NCc1cccc(c1)F	KX-02	7.76632
CN(CCCn1c(=O)c2ccccc2c2c1cccc2)C	FANTRIDONE	7.73053
N#CC1=C(N)Oc2c(C1c1cc(Br)c(c(c1)OC)OC)ccc(c2N)N	Crolibulin	7.50852
O[C@H]1C[C@@H](C[C@H]1COS(=O)(=O)N)n1ccc2c1ncnc2N[C@H]1CCc2c1cccc2	MLN-4924	7.33092
CCN(CC(CNc1c2cc(OC)ccc2nc2c1ccc(c2)Cl)O)CC	ACRANIL	7.29529
ONC(=O)/C=C/C#Cc1cccc(c1)NS(=O)(=O)c1ccccc1	OXAMFLATIN	7.27904
CN[C@H](C(=O)N[C@H](C(=O)N([C@H]([C@@H](CC(=O)N1CCC[C@H]1[C@@H]([C@H](C(=O)N[C@H](c1nccs1)Cc1ccccc1)C)OC)OC)[C@H](CC)C)C)C(C)C)C(C)C	Monomethylauristatin D	7.10668
CN1CCCC(C1)CN1c2ccccc2Sc2c1cccc2	mepartricin	7.08047
COc1cccc2c1ccc1c2nc2c(n1)cccc2C(=O)N[C@@H](CN(C)C)C	MLN 576	6.84319
CCOP(=O)(Cc1ccc(cc1)c1nc2c(s1)cccc2)OCC	Fostedil	6.83604
SCC(C(c1ccccc1)C)C(=O)NC(C(=O)O)C	unknown stereoisomer of RB-105	6.82092
OCCNCCNc1ccc(c2c1C(=O)c1c(C2=O)c(O)ccc1O)NCCNCCO	mitoxantrone	6.7684
CC([C@H](N(C(=O)[C@H](C(C)(C)C)NC(=O)[C@H]1CCCCN1C(C)C)C)/C=C(/C(=O)O)\C)C	E-7974	6.75854
COC(=O)C1c2cc3c(c(c2C(CC1(O)CC)OC1OC(C)C(C(C1)N(C)C)OC1CC(O)C(C(O1)C)OC1CCC(=O)C(O1)C)O)C(=O)c1c(C3=O)cccc1O	aclarubicin	6.70865
O=C(N1C(=O)C(c2c1cc(F)cc2)(C)C)NCC1CCN(CC1)CC1(O)CCOCC1	PF-03382792	6.592
COc1cc2N(C)[C@@H]3[C@@]4(c2cc1[C@]1(C[C@@H]2CN(CCc5c1[nH]c1c5cccc1)C[C@](C2)(O)CC)C(=O)OC)CCN1[C@H]4[C@@]([C@H]([C@]3(O)C(=O)N)O)(CC)C=CC1	vindesine	6.55435
CCCCCCOC(=O)C1(O)CC2OC1(C)n1c3ccccc3c3c1c1n2c2ccccc2c1c1c3CNC1=O	KT-5720	6.52742
Cc1ccc(c(c1)C(=O)N1C[C@@H](CC[C@H]1C)COc1ccc(cn1)F)c1ncccn1	Filorexant	6.51079
CN(CCc1ccc(cc1)NS(=O)(=O)C)CCOc1ccc(cc1)NS(=O)(=O)C	dofetilide	6.37484
CC([C@H](N(C(=O)[C@H](C(C)C)NC(=O)[C@@H](N(C)C)C(C)C)C)C(=O)N1CCC[C@H]1C(=O)N1CCC[C@H]1C(=O)NCc1ccccc1)C	Cemadotin hydrochloride	6.34717
CN[C@H](C(=O)N[C@H](C(=O)N1CCC[C@H]1C(=O)Nc1sc(nc1c1ccccc1)c1ncco1)C1CCCCC1)C	CUDC-427	6.20409
CC[C@H]1N(C(C)C)c2nc(ncc2N(C1=O)C)Nc1ccc(cc1OC)C(=O)N[C@@H]1CC[C@H](CC1)N1CCN(CC1)CC1CC1	Volasertib	6.14024
CN1CCN(CC1)Cc1ccc(cc1)C(=O)Nc1ccc(c(c1)Nc1scc(n1)c1cccnc1)C	masitinib	6.11674
NC(=O)C1CCCc2c1[nH]c1c2cc(cc1)Cl	selisistat	6.10523
CCn1c(=O)n(CC=C)c(cc1=O)N	AMINOMETRADINE	5.90283
C1CN2CCC1C(C2)Oc1ccc(nn1)c1ccccc1		5.81127
c1ccc2c(c1)[nH]c(n2)c1nc2c([nH]1)cccc2	NSC 67061	5.77908
CONC(=N)c1ccc(cc1)c1ccc(o1)c1ccc(cc1)C(=N)NOC	pafuramidine	5.75642
CCOC(=O)O[C@@]1(CC[C@@H]2[C@]1(C)C[C@H](O)[C@H]1[C@H]2CCC2=CC(=O)C=C[C@]12C)C(=O)COC(=O)CC	prednicarbate	5.73945
S=C=NCCCCS(=O)C	Sulforaphane	5.70198
COc1cc(ccc1S(=O)c1ccccc1)c1cnn2c1ncnc2O	BOF-4272	5.69107
O=C(c1sccc1NCc1ccnc2c1cccc2)Nc1ccc(cc1)OC(F)(F)F	OSI-930	5.6409
NC(=O)/C=C/1\CCc2c1cc(F)cc2F	GW-275919	5.6348
OC[C@@H](C(=O)Nc1cc(/C=C\c2cc(OC)c(c(c2)OC)OC)ccc1OC)N	AVE-8062	5.59603
COCCN1CCN(CC1)CC1CCN(C1=O)c1ccc(cc1)Cl	MS-377	5.52949
CN[C@@H](C(c1ccccc1)(C)C)C(=O)N[C@@H](C(C)(C)C)C(=O)N([C@@H](C(C)C)/C=C(/C(=O)O)\C)C	taltobulin	5.50763
NC(C=C)CCC(=O)O	vigabatrin	5.45885
OC(=O)C(c1ccc(cc1)C(=O)c1cccs1)C	suprofen, Cusi	5.44493
Cc1ccc(c(c1)c1n[nH]c(c1)c1ccccc1)O	VRT-532	5.44075
OC(=O)[C@H](NC(=O)c1ccc(cc1)NCc1cnc2c(n1)c(N)nc(n2)N)CCCNC(=O)c1ccccc1C(=O)O	PT 523	5.43848
CN(Cc1cc(=O)c(cn1O)O)CC1=C(C(=O)O)N2[C@H](SC1)[C@@H](C2=O)NC(=O)/C(=N/OC(C(=O)O)(C)C)/c1csc(n1)N	CP 6232	5.42487
COC(=O)Nc1nc2n(c1)nc(cc2)OCc1cc(OC)c(c(c1)OC)OC	1069C	5.36871
COc1ccc(cc1)n1c(O)ncc1C	METAZAMIDE	5.366
CCNC(=O)C[C@@H]1N=C(c2ccc(cc2)Cl)c2c(n3c1nnc3C)ccc(c2)OC	GSK-525762	5.35466
C#CCOC(=O)C1CNC=NC1	CDD 0097	5.34041
COc1ccc(cc1OC)[C@@H](CN1CCN(CC1)c1cccccc1=O)O	CILADOPA	5.31593
N[C@@H]1CC[C@H](CC1)Nc1nc(Cc2ccccc2)nc2c1c1ccc(cc1[nH]2)c1nnn(n1)C	UM171	5.31193
CCCCc1ccc(cc1O)O	Rucinol	5.28391
CCCc1n(C)nc2c1nc([nH]c2=O)c1cc(ccc1OCC)S(=O)(=O)N1CCN(CC1)C	iso-Sildenafil	5.2783
CCSCC(=O)C12OC(O[C@@H]1C[C@@H]1C2(C)C[C@H](O)[C@]2([C@H]1C[C@@H](C1=CC(=O)C=CC21C)F)F)(C)C		5.26702
O=S1(=O)CCN(CN1)CN1CCS(=O)(=O)NC1	taurolidine	5.20249
CC[C@H]1N(C2CCCC2)c2nc(ncc2N(C1=O)C)Nc1ccc(cc1OC)C(=O)NC1CCN(CC1)C	BI-2536	5.20192
COc1cccc(c1)OCC1CCCCN1		5.19129
COc1ccc(cc1)CN(c1ccccn1)CCN(C)C	Mepyramine Maleate	5.14027
CCOc1ccc(cc1)OCC(=O)C1CCCC1		5.12923
COc1cc2N(C)[C@@H]3[C@@]4(c2cc1[C@]1(C[C@@H]2CN(CCc5c1[nH]c1c5cccc1)C[C@](C2)(O)CC)C(=O)OC)CCN1[C@H]4[C@@]([C@H]([C@]3(O)C(=O)N)O)(CC)C=CC1	vindesine	5.12011
O=C(Nc1ccccc1N)/C=C/c1ccn(c1)S(=O)(=O)c1ccc(cc1)c1cnn(c1)C	4SC-202	5.11782
CN(CC(CN1c2ccccc2OCOc2c1cc(Cl)cc2)C)C	Traboxopine hydrochloride	5.08228
COc1cc(OC)c(c(c1)OC)/C=C/S(=O)(=O)Cc1ccc(c(c1)OP(=O)(O)O)OC	Briciclib sodium	5.06301
CN1CCCC(=C(c2cccs2)c2cccs2)C1	TIPEPIDINE	5.03773
COc1cc(ccc1OC)C[C@H]([C@H](Cc1ccc(c(c1)OC)OC)C)C	terameprocol	5.01028
OC[C@H]([C@H]([C@@H]1O[C@@](O)(C[C@@H]([C@H]1NC(=O)C)O)C(=O)O)O)O	aceneuramic acid	5.0052
NC[C@@H](NC(=O)c1oc(c(c1)c1c(Cl)cnn1C)Cl)Cc1ccc(c(c1)F)F	Uprosertib	5.00308
CCC1=C[C@@H]2CN(C1)Cc1c3ccccc3[nH]c1[C@@](C2)(C(=O)OC)c1cc2c(cc1OC)N([C@@H]1[C@@]32CCN2[C@H]3[C@@](CC)(C=CC2)[C@H]([C@]1(O)C(=O)OC)OC(=O)C)C	vinorelbine	4.97326
COc1cc(cc(c1OC)OC)C(=O)NC1CCCNC1	troxipide	4.95457
C1CN=C(N1)N/N=C/c1c2ccccc2c(c2c1cccc2)/C=N/NC1=NCCN1	bisantrene HCl	4.94795
C1/C=C/COCc2cc(ccc2OCCN2CCCC2)/N=c/2\nc(c3cc(CO1)ccc3)cc[nH]2	Pacritinib	4.94139
CN1CCN(CC1)C(=O)/C=c\1/c2ccccc2[nH]c(=O)c2c1cccc2	Darenzepine	4.89874
C1CNC(=C2COc3c(O2)cccc3)N1	idazoxan	4.89375
CC(CC(=O)OCC1=CO[C@H]([C@H]2[C@@H]1C[C@@H]([C@@]12CO1)OC(=O)C)OC(=O)CC(C)C)C	DIDROVALTRATE	4.86665
O=C1CC2C(C1(CC2)S(=O)(=O)O)(C)C		4.85747
CC(NC(C(c1ccc(cc1)O)O)C)CCc1ccccc1	nylidrin hydrochoride	4.80221
CCCCOc1nc(N)c2c(n1)n(CCCCCC1CCNCC1)c(=O)[nH]2	2245035	4.7976
COc1cc(cc(c1OC)OC)[C@H]1[C@H]2C(=O)OC[C@@H]2[C@H](c2c1cc1OCOc1c2)O	Podofilox	4.78642
COC(=O)Nc1[nH]c2c(n1)cc(cc2)Sc1ccccc1	FENBENDAZOLE	4.72382
OC(=O)Cc1cc(C)ccc1Nc1c(F)cccc1Cl	lumiracoxib	4.71904
O=C1CCC(=O)N1C[C@H]1CC[C@@H]2N(C1)CCN(C2)c1ncccn1	Sunepitron hydrochloride	4.66122
CCOC(=O)C1=C[C@]2(CC)CCCN3[C@@H]2c2n1c1ccccc1c2CC3	vinpocetine	4.64524
COCCOCOc1ccc(cc1C12CC3CC(C2)CC(C1)C3)C(=O)/C=C/c1ccc(cc1)C(=O)O	MX 781	4.64522
ONC(=O)CCCCCCC(=O)Nc1cccnc1	pyroxamide	4.61353
O=NC1CC[C@H]2C(=C1)CC[C@@H]1[C@@H]2CC[C@]2([C@H]1CC[C@]2(C#C)OC(=O)C)CC	Norgestimate	4.58912
CCN(CCCNc1nccc2c1c(C)c1c(c2C)nc2c1cc(OC)cc2)CC	RETELLIPTINE	4.5724
CCC(c1nccs1)(c1cccc(c1)OCc1ccc2c(c1)cccc2)OC	ICI-211965	4.56664
O=C[C@]12CC[C@@H](C[C@H]1CC[C@@H]1[C@@H]2CC[C@]2([C@]1(O)CC[C@@H]2C1=CC(=O)OC1)C)OC1OC(C)C(C(C1O)O)O		4.56447
O=C1Oc2ccccc2C(=O)C1C(C1C(=O)Oc2c(C1=O)cccc2)C	ETHYLIDENE DICOUMAROL	4.54898
OCC(C(=O)NNCc1ccc(c(c1O)O)O)N	Benserazide HCl	4.53813
CC(N[C@H]1C=CC(C1)(c1ccccc1)c1ccccc1)(C)C	PH-CBR-2016-001-HVAC-04652-0I	4.52774
COc1cc(CCN(CCCOc2ccc(cc2)S(=O)(=O)c2c(C(C)C)c3c(n2C)cccc3)C)ccc1OC	SR-33805A	4.52121
OC(=O)C(Cc1ccc(cc1)OCCN(c1nc2c(o1)cccc2)C)OCC(F)(F)F	SB 219994	4.50966
O=C(Nc1ccccc1N)CCCCCNC(=O)c1ccc(cc1)C	RG-2833	4.50632
N#C/N=C(\c1cccnc1)/NCC(C)C		4.46129
N[C@@H]1CC[C@H](CC1)Nc1nc(NCc2cccc(c2)I)c2c(n1)n(cn2)C1CCCC1	MDL-106327DA	4.45685
Cc1ccc2c(c1)c(=O)c(co2)c1nnn[nH]1		4.45497
FC(c1cccc(c1)c1ccc(cc1)c1cn2c(n1)sc(n2)S(=O)(=O)N)(F)F	AEG-33783	4.45005
C[C@H]1CNCCCN1S(=O)(=O)c1cccc2c1c(F)cnc2	Ripasudil hydrochloride hydrate	4.44951
Nc1nc(S)c2c(n1)[nH]cn2	Tioguanine	4.44055
COc1ccc(c(c1)C1Sc2ccccc2N(C1=O)C)OCCCN(CCOc1ccc2c(c1)OCO2)C	SEMOTIADIL	4.43969
O=C1N(Cc2c1cc(c(c2)Cl)S(=O)(=O)N)C1CCCCC1	CLOREXOLONE	4.41826
COc1ccc2c(c1)c(CCN(C(C)C)C(C)C)cn2	5-MeO-DIPT	4.41409
Oc1ccc(cc1)C1COc2c(C1)ccc(c2)O	AUS-131	4.40873
COc1c(OC)ccc2c1c[n+](C)c1c2ccc2c1cc1OCOc1c2	chelerythrine	4.4071
N#CN/C(=N\CCCCCCOc1ccc(cc1)Cl)/Nc1ccncc1	CHS-828	4.39271
CCCCC(C1NC(=O)N(C1=O)SC(Cl)(Cl)Cl)CC	CHLORDANTOIN	4.38682
COCCOCCOCCOCCOC(=O)OC[n+]1ccc(cc1)N/C(=N/C#N)/NCCCCCCOc1ccc(cc1)Cl	Teglarinad chloride	4.36315
O[C@H]1CC[C@]2(C(=CC[C@@H]3[C@@H]2CC[C@]2([C@H]3CC=C2c2cccnc2)C)C1)C	Pharmaprojects No. 4598	4.36101
CCCCCCC(=O)OC(COC(=O)CCCCCC)COC(=O)CCCCCC	triheptanoin, Ultragenyx	4.35671
O=C(N[C@H](C(=O)N[C@@H](C(=O)N[C@H](C(=O)N(C)C)Cc1ccccc1)Cc1c[nH]c2c1cccc2)C)CNC(=O)C1CCCCC1	GR-100679	4.3427
Oc1cccc(c1)NC(=O)c1ccc(c(c1)O)O		4.28608
CCCCOc1nc2ccccc2c(c1)C(=O)NCCN(CC)CC	Dibucaine	4.28352
CNc1ccc(c(n1)F)c1cc2c(o1)ccc(c2)O	AZD4694	4.26004
COc1cc2N(C)[C@@H]3[C@@]4(c2cc1[C@]1(C[C@H]2CN(Cc5c1[nH]c1c5cccc1)C[C@@H](C2)C(F)(F)C)C(=O)OC)CCN1[C@H]4[C@@]([C@H]([C@]3(O)C(=O)OC)OC(=O)C)(CC)C=CC1	Vinflunine (Tartrate)	4.2494
COc1cc(cc(c1OC)OC)C1CN=C(O1)c1ccc2c(c1)ccn2C	A 289099	4.24673
ClCCN(Cc1ccccc1)Cc1ccccc1	DIBENAMINE	4.23967
Clc1ccccc1Oc1cccn2c1nnc2[C@]12CC[C@@](C2)(CC1)O	BMS-770767	4.22966
NC1=N[N+](CC1)(C)c1cccc(c1)C(F)(F)F		4.22566
OCCNC(=O)C(c1ccc(cc1)CC(C)C)C	mabuprofen	4.22141
O=C1NC(=O)NC(=O)C1(c1ccccc1)c1ccccc1	T-2007	4.22109
Cc1ccc(cc1)C(=O)Nc1ccc(cc1)C1=NCCN1		4.21598
Nc1cc(nc(=N)n1O)N1CCCCC1	minoxidil	4.19798
CCCCNc1nc(c(s1)C(=O)c1ccc2c(c1)[nH]c(n2)NC(=O)OC)C	CGI-13866	4.18888
O=C1c2ccccc2CN2N1Cc1ccccc1C2=O	diftalone	4.18665
N#Cc1ccccc1Cn1c(=O)n(c2c1c(cc(n2)C)N1CCC[C@H](C1)N)C	Imigliptin dihydrochloride	4.18114
COc1ccccc1N1CCN(CC1)CCc1ccc2c(c1)sc(=O)n2C	S 203961	4.17936
OC(CN1CCN(CC1)C(c1ccc(cc1)F)c1ccc(cc1)F)CSc1ncnc2c1nc[nH]2	carsatrin	4.16875
N#Cc1cnc(s1)c1ccc(cc1F)N1C[C@@H](OC1=O)CNC(=O)C	PNU 176798	4.16693
OC(=O)CNC(=O)c1ccccc1NS(=O)(=O)c1ccc(cc1)OC(=O)C(C)(C)C	sivelestat sodium hydrate	4.16643
CNC(=O)C1CCN(CC1)Cc1cc(cc(c1)F)NC(=O)Nc1ccc(nc1)C		4.1621
Nc1ccc(cc1)C1=NN(C(=O)C)[C@@H](Cc2c1cc1OCOc1c2)C	talampanel	4.15036
CC1CCC2N(C1)CCc1c2n(Cc2ccccc2)c2c1cccc2		4.13951
O=CN1c2cc(OC)c(cc2[C@]23[C@@H]1[C@@](O)(C(=O)OC)[C@H](OC(=O)C)C1([C@@H]3N(CC2)CC=C1)CC)[C@]1(C[C@@H]2CN(CCc3c1[nH]c1c3cccc1)C[C@](C2)(O)CC)C(=O)OC	vincristine, Liposome Co	4.13927
OC(c1ccccc1)(c1ccccc1)C1CN2CCC1CC2	QUIFENADINE	4.13607
Fc1cccc(c1)c1sc2c(c1)c(nnc2C(=O)N)N[C@H]1CCCNC1	analog of Puquitinib	4.12669
Brc1ccc(cc1)OC(=O)N1CCN2CC1CC2	analog of SSR-180711	4.11408
OC(=O)Cc1cc(C)cc(c1)C	(3,5-dimethylphenyl)acetic acid	4.11061
COc1cc2nc(nc(c2cc1OC)NCCN1CCOCC1)c1ccc(cc1)N1CCN(CC1)C	CPG-52364	4.11061
CCOC(=O)c1nc(=O)c2c([nH]1)nc1c(c2)cc(c(c1)OC)OC	PIROLATE	4.10614
O=C1C=C[C@]2(C(=C1)CC[C@@H]1[C@@H]2[C@@H](O)C[C@]2([C@H]1CC[C@]2(O)C(=O)COC(=O)c1cccc(c1)S(=O)(=O)[O-])C)C	Predocol	4.10034
COc1cc(ccc1OC)c1nc(Nc2ncccc2C(=O)N)n2c(c1)ncc2	BAY 61-3606 dihydrochloride	4.09467
CCP(=[Au]S[C@@H]1O[C@H](COC(=O)C)[C@H]([C@@H]([C@H]1OC(=O)C)OC(=O)C)OC(=O)C)(CC)CC	AURANOFIN	4.09059
c1ccc(cn1)C1CCC2CCN1CC2	TC-1698	4.08693
CCC(=C(c1ccc(cc1)OP(=O)(O)O)c1ccc(cc1)OCCN(C)C)c1ccc(cc1)C(C)C	MIPROXIFENE	4.07508
O=C(c1cc2c(o1)cccc2)N[C@H]1C2CCN([C@@H]1Cc1cccnc1)CC2	Bradanicline	4.07014
NCCCC[C@@H](C(=O)N[C@H](C(=O)NCC(=O)NCC(=O)N1CCC[C@H]1C(=O)N[C@H](C(=O)N[C@H](C(=O)NCC(=O)N[C@H](C(=O)N1CCC[C@H]1C(=O)N1CCC[C@H]1C(=O)N1CCC[C@H]1C(=O)N[C@H](C(=O)N)CO)C)CO)CO)CC(=O)N)NC(=O)[C@@H](NC(=O)[C@H](Cc1c[nH]c2c1cccc2)NC(=O)[C@@H](NC(=O)[C@H]([C@H](CC)C)NC(=O)[C@@H](NC(=O)[C@@H](NC(=O)[C@@H](NC(=O)[C@H](C(C)C)NC(=O)[C@@H](NC(=O)[C@@H](NC(=O)[C@@H](NC(=O)[C@@H](NC(=O)[C@@H](NC(=O)[C@@H](NC…	Exenatide	4.06854
CCCCC1(CCCC)CS(=O)(=O)c2c([C@H]([C@H]1O)c1ccc(cc1)OCc1ccc(cc1)C[N+]13CCN(CC1)CC3)cc(cc2)N(C)C	Lopixibat chloride	4.06451
COC(=O)N[C@H](C(=O)N1CCC[C@H]1c1[nH]c2c(n1)cc(cc2)c1csc2c1scc2c1ccc(cc1)c1cnc([nH]1)[C@@H]1CCCN1C(=O)[C@@H](c1ccccc1)NC(=O)OC)C(C)C	Samatasvir	4.04928
N#Cc1cc2nc(O)c(nc2cc1[N+](=O)[O-])O	FG-9065	4.049
CCC12CCCN3C2c2n(C(=O)C1)c1c(c2CC3)cccc1	vinburnine	4.04631
O=C1NCCc2c1cc([nH]2)c1ccncc1	Cdc7/Cdk9 Inhibitor	4.04315
CCCCCCCCCCCCCCCC(=O)OCCC1CCN(CC1)CCCN1c2ccccc2Sc2c1cc(cc2)S(=O)(=O)N(C)C	pipotiazine palmitate	4.03464
O=C(C(C)(C)C)Nc1c(C)cc(c2c1N(CC2)CC1CC1)C		4.03219
CN1CCCC1CCNS(=O)(=O)c1ccc2c(c1)CN(CC2)CC1CCCCC1	SAR-110894	4.02662
O=C(N1CCCCC1)C=CC=Cc1ccc2c(c1)OCO2	Piperine	4.02588
CO[C@@H]1/C=C\C=C(\C)/Cc2cc(OC)c(c(c2)N(C(=O)C[C@@H]([C@]2([C@H]([C@@H]([C@@H]3C[C@@]1(O)NC(=O)O3)C)O2)C)OC(=O)[C@@H](N(C(=O)C)C)C)C)Cl	MAYTANSINE	3.98864
CN(CCOC(c1cccc(c1)C)c1ccccc1)C		3.98511
COc1ccccc1OC(=O)CNC(=O)Cc1ccc(n1C)C(=O)c1ccc(cc1)C	amtolmetin guacil	3.98196
COc1c2c(CCC(c3c2ccc(c(=O)c3)SC)NC(=O)C)cc(c1OC)OC	CGX-6001-B	3.9754
Nc1ccc(cc1)C(=O)N1CCc2c1ccc(c2)S(=O)(=O)N1C[C@@H](NC1=O)c1ccccc1	DW 2282	3.97008
CC(CNC(=O)[C@@H]1C[C@](C1)(F)c1ccc(c(c1)F)CN1CCCC1)C	PF-3654764	3.96823
CCNC(=O)c1nn(c(n1)CN(C)C)c1ccc(cc1C(=O)c1ccccc1Cl)Cl	CGP-11952	3.96609
O=C(c1ccc(cc1)/C=C/c1n[nH]c2c1cccc2)N1CCNCC1	KW-2449	3.96228
O=C(c1ccc(cc1)F)CCCN1CC2CCC(C1)CC2	nonaperone	3.96033
O=S(=O)(C(F)(F)F)Nc1cccc(c1)OCc1ccc2c(n1)cccc2	Ritolukast	3.94736
C[N+]1(CCCCCCCCCCCCCCCC[N+]2(C)CCCC2)CCCC1	G-25	3.93892
CC[C@H]1OC(=O)[C@H](C)[C@@H](O[C@@H]2O[C@@H](C)[C@@H]([C@](C2)(C)OC)O)[C@H](C)[C@@H](O[C@@H]2O[C@H](C)C[C@@H]([C@H]2O)N(C)C)[C@](C[C@](C(=O)[C@@H]([C@H]([C@]1(C)O)O)C)(C)F)(C)O	Flurithromycin	3.93823
Sc1nc(O)c(c(n1)O)C(=O)Nc1ccccc1	merbarone	3.92691
CCN(CCOC(=O)C(c1ccccc1)C1CCCCC1)CC	DROFENINE	3.90842
O=C1C=C[C@]2(C(=C1)CC[C@@H]1[C@@H]2CC[C@]2([C@H]1CCC2=O)C)C		3.90311
O=C([C@@H]1CC[C@@H]2CN1C(=O)N2OS(=O)(=O)O)NNC(=O)[C@@H]1CCCNC1	Zidebactam	3.90042
C1COC(CN1)COc1ccccc1Cc1cccs1	Teniloxazine maleate	3.89444
CC(Sc1cc(c(c(c1)C(C)(C)C)O)C(C)(C)C)(Sc1cc(c(c(c1)C(C)(C)C)O)C(C)(C)C)C	Panavir	3.86883
CNCCCOc1cc(F)c(c(c1)F)c1c(Cl)nc2n(c1N[C@H](C(F)(F)F)C)ncn2	cevipabulin fumarate	3.86732
CC(=O)OC1CC[C@@H]2[C@]1(C)CC[C@H]1[C@H]2CC[C@@H]2[C@]1(C)CC(Cl)/C(=N\Oc1ccc(cc1)[N+](=O)[O-])/C2	NISTERIME ACETATE	3.86704
N#Cc1cccc(c1)S(=O)(=O)Nc1ccc(c2c1ncc2C#N)C	E-7820	3.86047
O=C1C=CC(C=C1)(O)c1cc2c(n1S(=O)(=O)c1ccccc1)cccc2	BW-114	3.85894
c1ccc(cc1)NCc1nc2c([nH]1)cccc2		3.85345
OCC(=O)[C@@]1(O)CC[C@@H]2[C@]1(C)C[C@H](O)[C@H]1[C@H]2CCC2=CC(=O)C=C[C@]12C	Prednisolone	3.85107
O[C@H]1CC[C@]2([C@@H](C1)CC[C@@H]1[C@@H]2CC[C@]2([C@]31O[C@@H]3C[C@@H]2c1ccc(=O)oc1)C)C	Bufogenin	3.82376
COCCOCC1NC2C(C)CC(C)(O)C(OC3OC(C)CC(C3O)N(C)C)C(C)C(C(C(=O)OC(C(C(O1)C2C)(C)O)CC)C)OC1OC(C)C(C(C1)(C)OC)O	dirithromycin	3.82237
[O-][N+](=O)c1ccc(cc1)[As](=O)(O)O	NITARSONE	3.8222
COc1cccc(c1)C1CC1CNC(=O)C		3.81206
Fc1ccc(cc1)C1CCNCC1COc1ccc2c(c1)OCO2	paroxetine	3.80056
CCCCCC(CC(=O)CCc1ccc(c(c1)OC)O)O	6-Gingerol	3.78735
CCCc1cc(ccn1)C(=S)N	Protionamide	3.77921
CNC(=O)c1ccc2c(c1)CCO[C@H]2CCN1CCN(CC1)c1ccc(cc1)OC	PNU 109291	3.77744
OC(=O)c1cc(ccc1O)n1c2CCc3c(c2cc1c1ccccc1)cccc3	FENDOSAL	3.77613
OC[C@H]1O[C@H]([C@@H]([C@@H]1NC(=O)[C@H](Cc1ccc(cc1)OC)N)O)n1cnc2c1ncnc2N(C)C	PUROMYCIN	3.76384
CCC(=O)Nc1c(C)cc(cc1C)C(=O)N1CCC(CC1)N(CCc1ccccc1)C	OPC 28326	3.76338
OC(=O)c1ccc2c(c1)[nH]nn2	CBT-1	3.75627
OC(=O)C(c1ccc2c(c1)C(=O)Cc1c(O2)ccc(c1)C)C	Bermoprofen	3.75269
Clc1cccc(c1)N1CCN(CC1)CCCn1nc2n(c1=O)cccc2	trazodone	3.73751
CCCN1CCCC[C@H]1C(=O)Nc1c(C)cccc1C	IQB-9302	3.73512
Clc1ccc(cc1)Cn1c(cc2c1cccc2)C(=O)O		3.73428
CN(CC(CN1c2ccccc2Sc2c1cccc2)C)C	Trimeprazine tartrate	3.72723
CCCc1cc2c(s1)CN[C@H]1[C@H]2c2cc(OC(=O)C)c(cc2CC1)OC(=O)C	ADROGOLIDE	3.69558
CN1C2CCC1CC(C2)OC(=O)c1c[nH]c2c1cccc2	Tropisetron Hydrochloride	3.69407
O=c1oc2cc(ccc2c2c1CCCCC2)OS(=O)(=O)N	Irosustat	3.68423
O[C@H](CN1CCOCC1)CNC(=O)c1c(C)[nH]c(c1C)/C=C/1\C(=O)Nc2c1cc(F)cc2	SU-14813	3.68278
CN(C[C@H](c1ccccc1)NC(=O)N1Cc2c(C1(C)C)[nH]nc2Nc1nc(C)nc2c1scc2)C	PF-3758309	3.68054
C[C@@H]1COC(=N1)Nc1ccc2c(c1)c(ncn2)Nc1ccc(c(c1)Cl)OCc1nccs1	varlitinib	3.67509
CN(CCc1ccc(cc1)O)C	HORDININE	3.67489
OC(=O)C(C12C3C4C2C2C1C3C42C(=O)O)(CC1c2ccccc2Sc2c1cccc2)N	PRE-703	3.65815
O=C(Nc1c(C)cccc1C)CN1CCCC1	PYRROCAINE	3.6516
COc1cc2c(cc1C(=O)N)CC[C@@H]1[C@@H]2CC[C@]2([C@H]1CC=C2)C	ENMD-1198	3.64102
O=C1OC(c2c1cccc2)n1cc(F)c(=O)[nH]c1=O	590-S	3.62274
Clc1ccc(cc1)Cn1cc(c2c1cccc2)C(=O)C(=O)Nc1ccc2c(c1)cccn2	Entasobulin	3.60727
Fc1ccc(cc1)c1cc(OCCCCCN2CCCCC2)nc(n1)C	enecadin	3.59865
CNn1cc(C(=O)O)c(=O)c2c1cc(N1CCN(CC1)C)c(c2)F	AMIFLOXACIN	3.59402
NCC1(C2CC3CC1CC(C2)C3)c1cccc(c1)C	CEB 1604	3.5924
O=C(C(C)C)Nc1ccc(c(c1)C(F)(F)F)[N+](=O)[O-]	flutamide	3.59094
CC(NC(=O)c1cnc2n1CCc1c(C32CCNCC3)cccc1)C		3.58602
CSc1ccccc1N(C(=O)CN(C(=O)OCC(C)C)CCN(C)C)Cc1ccc(cc1)C(F)(F)F	flosatidil	3.58355
CC(=O)Oc1ccccc1C(=O)Nc1ncc(s1)[N+](=O)[O-]	NITAZOXANIDE	3.57966
O=C1N=C(CN1c1ccc(cc1)Cl)N1CCOCC1	AWD-131-138	3.57576
C=CCn1c(=O)c(C(=O)Nc2cccc(c2C)C)c(c2c1cccc2)O		3.57252
OC[C@H]([C@H]([C@@H]1OC(=C[C@@H]([C@H]1NC(=O)C)NC(=N)N)C(=O)O)O)O	zanamivir	3.55416
C[C@H](C(C)(C)C)/N=C(/Nc1ccc(cc1)C#N)\NC#N	NAMINIDIL	3.54774
[O-][N+](=O)O[Bi].[O-][N+](=O)O[Bi].[O-][N+](=O)O[Bi].[O-][N+](=O)O[Bi].O[Bi]=O.O.O.O.O.O.O.O.O	Bismuth subnitrate	3.54533
CCCCCCCCN[C@@H]([C@H](c1ccc(cc1)SC(C)C)O)C	suloctidil	3.53818
Nc1ccc2c(c1)nc1c(c2)ccc(c1)N	Proflavine	3.5375
CC(N1CC(=O)N(C(=O)C1)CN1CCOCC1)CN1CC(=O)N(C(=O)C1)CN1CCOCC1	PROBIMANE	3.53093
Fc1cccc(c1)C(=O)Oc1c(Br)cc(c2c1nc(C)cc2)Br		3.52991
O=C1C=C[C@]2(C(=C1)CCC1C2(F)C(O)C[C@]2(C1CC(C2(O)C(=O)COC(=O)c1cccc(c1)S(=O)(=O)[O-])C)C)C		3.52958
CN1C2CCC1CC(C2)OC(=O)c1c[nH]c2c1cccc2	ICI-205930	3.52849
Fc1ccc(c2c1CCC2)OC[C@@H]1CNCCO1	LUBAZODONE	3.52674
Cc1cnc(nc1)NS(=O)(=O)c1ccc(cc1)N	SULFAPERINE	3.51989
OC[C@@](c1ccccc1)(C(=O)O[C@H]1CN2CCC1CC2)CC[S@+](C)[O-]	REVATROPATE	3.51881
Clc1ccc2c(c1)C(=NCC(=S)N2C)c1ccccc1	SULAZEPAM	3.51769
CCCC=c1[nH]n(c(=O)n1Cc1ccc(cc1)c1ccccc1S(=O)(=O)NC(=O)c1sccc1C)c1ccccc1C(F)(F)F		3.50868
ClCC(Cn1c(C)ncc1[N+](=O)[O-])O	Ornidazole	3.4976
O=C(C(C)(C)C)NCCCC(=O)O	pivagabine	3.49469
Fc1cccc(c1Cn1nnc2c1ccnc2N)F	BW 534U87	3.48283
OCCNC(=O)CC(c1ccc(cc1)CC(CCCC(C)C)C)C	E-5050	3.48149
S=c1ssc(c1C)c1cnccn1	oltipraz	3.46628
CN(CCNC(=O)c1cccc2c1nc1ccccc1c2)C	SN-22995	3.463
N#Cc1c(C)nc(cc1N1CCSCC1)C		3.45786
Clc1ccc(cc1)NNC(=N)c1ccccc1		3.45242
Clc1ncc(cn1)NC(=O)c1ccc(c(c1)F)F	ICA-69673	3.4524
COc1c(ccc(c1OC)OC)C(=O)c1c(C)oc2c1cc(O)cc2		3.44524
CCC(CC(=O)c1c(C(=O)OC)c(c2ccc(c(c2)OC)OC)c2c(c1O)cc(c(c2OC)OC)OC)CC	S-8921	3.44043
O=C1NC(=O)C2(N1)CCc1c(C2)cccc1	TETRANTOIN	3.43306
Nc1nc(=N)n(nc1c1cccc(c1Cl)Cl)C(C)C	Palatrigine	3.43294
COc1cc2nc(nc(c2cc1OC)N)N1CCN(CC1)C(=O)C1=CC2CCC1C=C2	PRAZOBIND	3.43121
NCc1ccc(cc1)S(=O)(=O)c1ccc(cc1)N	P-SULFANILIDOBENZYLAMINE	3.4278
OC[C@H]1O[C@@H](Oc2cc3c(O)cc(cc3[o+]c2c2cc(O)c(c(c2)O)O)O)[C@@H]([C@H]([C@@H]1O)O)O[C@@H]1OC[C@H]([C@@H]([C@H]1O)O)O	Delphinidin-3-sambubioside	3.426
COc1cc(cc(c1OC)OC)[C@H]1[C@H]2C(=O)OC[C@@H]2Cc2c1cc1OCOc1c2	Deoxypicropodophyllin	3.42243
Sc1cccc[n+]1[O-]	omadine	3.41967
O=C(c1onc(n1)c1cc(Br)c(c(c1)Br)O)NCc1ccc(cc1)Oc1ccccc1	iOWH-032	3.41882
Brc1ccc(c(c1)F)Cn1c(=O)c2ccc(cc2n(c1=O)CC(=O)O)F	FK-505	3.4121
CCCCCCCCCCCCCC(=O)O[Pt-2]1([NH2+][C@H]2[C@H]([NH2+]1)CCCC2)OC(=O)CCCCCCCCCCCCC	Miriplatin hydrate	3.40838
Clc1ccc(c2c1cccn2)O	CLOXYQUIN	3.40483
O[C@H]1O[C@@H]2COC(O[C@@H]2[C@@H]([C@H]1O)O)c1ccccc1	KBG	3.39071
O=C(c1cc2c(cc1C)C(C)(C)CCC2(C)C)Oc1ccc(cc1)C(=O)O	AGN-190521	3.3862
C[C@H](Cn1cnc2c1ncnc2N)OCP(=O)(O)O	tenofovir (TFV)	3.38017
O=C([C@H]1CCC2[C@]1(C)CC[C@@H]1[C@@H]2CC[C@@H]2[C@]1(C)CC[C@@](C2)(C)O)CSS(=O)(=O)[O-]	CO122739	3.37632
CC[C@@H](C(C)C)CC[C@H]([C@H]1CCC2[C@]1(C)CCC1[C@H]2C[C@H]([C@@]2([C@]1(C)CC[C@@H](C2)O)O)O)C	Lebanus Cedra	3.37423
O=C(NP(=O)(N1CC1)N1CC1)OCc1ccccc1	BENZODEPA	3.37254
ClCC(=O)[C@@]1(O)[C@@H](C)CC2C1(C)CC(O)[C@]1(C2C[C@@H](C2=CC(=O)C=CC12C)F)F	HALOBETASOL	3.35893
CCCCCn1c(=O)n(CCCCC)c2c(c1=O)[nH]c(n2)Cl		3.35642
O=C1N=C(NC1(c1ccccc1)c1ccccc1)O	Phenytoin sodium	3.35412
CCN([C@H](Cc1ccc(cc1)OC)C)CCCC(=O)C1CCCCC1	SECOVERINE	3.3537
O=C(C(C)(C)C)OCOP(=O)(C(S(=O)(=O)O)CCCc1cccc(c1)Oc1ccccc1)OCOC(=O)C(C)(C)C	BMS-188494	3.34993
CN(CCn1c(=O)c2cc(cc3c2c(c1=O)ccc3)[N+](=O)[O-])C	Mitonafide	3.34818
CN(CCCN1c2ccccc2CCc2c1cc(Cl)cc2)C	Clomipramine	3.34787
CO/N=C(/c1nsc(n1)N)\C(=O)N[C@@H]1C(=O)N2[C@@H]1SCC(=C2C(=O)O)C[n+]1ccn2c1cccn2	cefozopran	3.33943
CCCCCCC(=O)O[C@@]1(C#C)CC[C@@H]2[C@]1(C)CC[C@H]1[C@H]2CCC2=CC(=O)CC[C@H]12	Norethisterone enanthate	3.31449
CCc1ccc(cc1)/C=C/1\SC(=N)NC1=O		3.31209
N#Cc1cc(Cl)ccc1OC[C@H](COc1cccc(c1)CC(C(=O)O)OC(C)C)F	E-3030	3.31122
O=C1O[Sb]2OC1C(O[Sb]1OC(=O)C(C(O2)C(=O)O)O1)C(=O)O	Potassium antimonyl tartrate	3.30936
CN(Cc1ccccc1)CC#C	Pargyline hydrochloride	3.3074
COc1ccc(cc1C(=O)NC[C@@H]1CCCN1CC1CC1)S(=O)(=O)N	CIPROPRIDE	3.30674
CC/C(=C(\c1ccc2c(c1)cn[nH]2)/c1ccc(cc1)/C=C/C(=O)O)/c1ccc(cc1Cl)F	ARN-810	3.30341
CC#CCn1c(nc2c1c(=O)n(nc2)C)N1CCNCC1	E-3024	3.29432
C=C=CCNCCCCNCC=C=C	MDL-72527	3.29423
OC(=O)CCCCC(SCc1ccccc1)CCSCc1ccccc1	AML therapy, Cornerstone Pharmaceuticals	3.28576
CN(CCNC(=O)NC[C@H]1CC[C@@H]2[C@H](O1)c1cc(ccc1N[C@H]2c1ccccc1)C(F)(F)F)C	EMD-534085	3.277
CC(=CCOc1cc(ccc1Cl)NC(=S)c1ccccc1)C		3.27007
O=C1NCCN1C1CCN(CC1)CC[C@@H]1COc2c(O1)cccc2		3.26946
C[C@@H]1C[C@H]2O[C@@H]2/C=C\C=C\C(=O)Cc2c(C(=O)O1)c(O)cc(c2Cl)O	Radicicol	3.25194
OCCNCCNc1ccc(c2c1C(=O)c1c(C2=O)cccc1)NCCNCCO	Ametantrone	3.25164
CCn1nc(cc(c1=O)Nc1cccc2c1cccn2)c1ccccc1	LAS-37779	3.24913
ClCCN(c1ccc2c(c1)nc(n2C)CCCCCCC(=O)NO)CCCl	CY-190602	3.24723
CN(CCN1CCN(C1=O)c1cccc(c1)Cl)C	IMIDOLINE	3.24517
O=C(Nc1ccc2c(c1)c(N)cc(n2)C)Nc1ccc2c(c1)c(N)cc(n2)C	AMINOQUINURIDE	3.24356
COc1c(ccc(c1OC)OC)CN1CCN(CC1)C(c1ccc(cc1)F)c1ccc(cc1)F	lomerizine HCl	3.23592
O=C(C(C)C)O[C@@H]1[C@@H](COC(=O)C(C)C)O[C@H]([C@]1(C)F)n1ccc(nc1=O)N	mericitabine	3.22996
COc1ccc2c(c1)ccc(c2)CCC(=O)C	nabumetone	3.22847
CO/N=C(\c1ccc(cc1)C(=O)C(C)(C)C)/OC(=O)c1ccc(cc1)C(=O)C(C)(C)C	SDZ-FOX-988	3.21632
O=C(c1ccc2c(c1)OC(O2)(F)F)NC1Cc2c(C1)cccc2	AVE3085	3.20658
CC(NCCc1ccccc1)C		3.20113
COc1ccc2c(c1)ncnc2N1CCc2c(C1)cccc2		3.19972
Clc1ccc2c(c1)NC(=c1c(=N2)cccc1)N1CCNCC1	APC-104	3.18952
O=C(C(c1ccccc1)(c1ccccc1)O)OC1CCC[N+](C1)(C)C	Mepenzolate	3.18179
OCCOc1c(C)cc(cc1C)c1nc2cc(OC)cc(c2c(=O)[nH]1)OC	Apabetalone	3.1795
NC(=O)[C@@H](NCc1ccc(cc1)OCc1cccc(c1)F)C	safinamide mesylate	3.17868
CC(=O)NCCc1c(Cc2ccccc2)[nH]c2c1cccc2	LUZINDOLE	3.17421
ClC(P(=O)(O)[O-])(P(=O)(O)[O-])Cl	clodronate disodium, Abiogen	3.17053
Cl[Bi]=O	BISMUTH OXYCHLORIDE	3.16426
CCCCCC(c1ccc(cc1)N1[C@@H](COCc2ccc(s2)C(=O)OC(C)C)CCC1=O)O	simenepag isopropyl	3.16214
OC(=O)c1cccnc1Nc1cccc(c1C)C(F)(F)F	flunixin	3.15448
CCCC(=O)OCC(=O)Nc1scc(n1)c1ccc(cc1)OC		3.15032
Clc1ccc2c(c1)C(=O)N1C(O2)CCO1	seclazone	3.14067
C/C(=C\CN1CCN(CC1)Cc1ccc2c(c1)OCO2)/CC/C=C(/CCC=C(C)C)\C	PIFARNINE	3.1395
NCC(=O)O[Cu]OC(=O)CN	Cupric Glycinate	3.13494
CN1CCC(CC1)N1CCN(CC1)C(=O)[C@@H](c1ccccc1)NC(=O)c1ccc2c(c1)ncc2	LY-517717	3.13344
N#Cc1ccc(cc1C(F)(F)F)N1C(=O)C2C(C1=O)C1(OC2(C)CC1NS(=O)(=O)CC)C	BMS-641988	3.13259
CCCCCCc1ccc(cc1O)O	HEXYLRESORCINOL	3.12667
CNC(=O)[C@H](C(C)(C)C)NC(=O)[C@@H](NC(=O)C(CCN1C(=O)N(C(C1=O)(C)C)C)S)CC(C)C	REBIMASTAT	3.11318
CC[N+](C(CC(c1ccccc1)c1ccccc1)C)(C)C	EMEPRONIUM BROMIDE	3.11316
O=c1[nH]c2c(n1CCN1CCN(CC1)c1cccc(c1)C(F)(F)F)cccc2	Flibanserin	3.10927
COc1cccc(c1)OCC1CNCCO1	ICI-60052	3.1035
CC(=CCc1ccc(cc1)C(C(=O)O)C)C	TA 60	3.10118
CCOC(=O)Nc1nc(N)c2c(c1)[nH]c(c([nH]2)c1ccccc1)C	mivobulin isethionate	3.09919
CCCC(C(=O)NCC(=O)N)CCC	Valrocemide	3.09336
O=C(N1CC2(OC1=O)CCN(CC2)CCc1ccccc1)Cn1cnc2c1c(=O)n(C)c(=O)n2C	spirophylline	3.08905
Cc1cccc(c1C)C(c1c[nH]cn1)C	dexmedetomidine (buccal)	3.08752
COc1cc(C)c(c(c1)C)S(=O)(=O)N(CCOCC(=O)N(Cc1ccc(cc1)C1=NCCN1)C)C	LFF-22-0542	3.07412
COc1ccc2c(c1)OC([C@@H]([C@H]2c1ccc(cc1)OCCN1CCCC1)c1ccccc1)(C)C	CENTCHROMAN	3.07375
CC[C@@H]([C@H](N(C(=O)[C@H](C(C)C)NC(=O)[C@@H](N(C)C)C(C)C)C)[C@@H](CC(=O)N1CCC[C@H]1[C@@H]([C@H](C(=O)N[C@H](c1nccs1)Cc1ccccc1)C)OC)OC)C	Dolastatin 10	3.07009
OC[C@H]1O[C@H]([C@@H]([C@@H]1O)O)n1ccc(nc1=O)NC(=O)C		3.06533
CCCN(C(=O)[C@@H]1[C@H](C(=O)O)[C@H]([C@H]1C(=O)N(Cc1ccc(cc1)Oc1ccccc1)CCC)C(=O)O)Cc1ccc(cc1)Oc1ccccc1	KF 66854	3.06504
CCN1CCN(C(=O)C1=O)CC(=O)N1CCC(C1)c1cccc(c1)Cl		3.0615
Cc1cc(Cl)c(c(c1)Cl)OCCOc1ccc(cc1)C1=C(C2NC(C1)CNC2)C(=O)N(C1CC1)Cc1cccc(c1C)C	MK-8141	3.05521
CSc1ccc(cc1)CN1CCCC(C1)Nc1ccc2c(c1)cn[nH]2	INS-117548	3.04714
O[C@@H]1CN2[C@@H]([C@@H]1O)[C@H](O)CCC2	Tridolgosir	3.0438
CCCCCCCCCCCC(c1cc(C)ccc1O)N=O	FLM-5011	3.03484
CCCCSc1nc(c(s1)CC(=O)O)C		3.02931
O=C(c1ccccc1)OC(c1ccccc1)CCN1CCCCC1		3.02797
CCCC(=O)O[C@@]1(CC[C@@H]2[C@]1(C)C[C@H](O)[C@]1([C@H]2C[C@@H](C2=CC(=O)C=C[C@]12C)F)F)C(=O)COC(=O)C	difluprednate	3.02583
CCOC(=O)/C=C/1\SC(C(=O)N1C)N1CCCCC1	dexetozoline	3.02536
NCCC[C@@H]1NC(=O)[C@H](CCN)NC(=O)[C@@H](NC(=O)[C@@H](NC(=O)[C@@H](NC(=O)[C@@H]2CCCN2C(=O)[C@H]2CCCN2C(=O)[C@@H](NC(=O)[C@@H](NC(=O)[C@@H](NC(=O)[C@@H](NC(=O)[C@@H](NC(=O)[C@@H](NC(=O)[C@H](NC1=O)CCN)CCN)Cc1cnc2c1cccc2)CCN)CCN)C)CO)[C@H](O)C)Cc1cnc2c1cccc2)[C@H](CC)C	Murepavadin	3.02313
CC(N1C(=O)OC2(C1=C)CCN(CC2)CCCC(c1ccc(cc1)F)c1ccc(cc1)F)(C)C	RGH 2716	3.02313
CCCCCN(C(=O)C(NC(=O)c1ccc(c(c1)Cl)Cl)CCC(=O)O)CCCCC	lorglumide	3.02151
O=C1CC[C@@H]2[C@]1(C)CC[C@H]1[C@H]2CCc2c1ccc(c2)OS(=O)(=O)O	Estrone 3-sulfate	3.01943
O=C1CC[C@@H](C(=O)N1)N1Cc2c(C1=O)cccc2OCc1ccc(cc1)CN1CCOCC1	Iberdomide	3.01398
Clc1ccc(cc1)CCCOCCCN1CCCCC1	pitolisant	3.01376
NCCCC[C@@H](C(=O)N[C@H](C(=O)N[C@H](C(=O)N[C@H](C(=O)N[C@H](C(=O)N[C@H](C(=O)N[C@H](C(=O)N[C@H](C(=O)N[C@H](C(=O)NC(C(=O)N[C@H](C(=O)N)CCCNC(=N)N)(C)C)CCCCN)C(C)C)CC(C)C)Cc1c[nH]c2c1cccc2)C)[C@H](CC)C)Cc1ccccc1)CCC(=O)O)NC(=O)[C@@H](NC(=O)[C@@H](NC(=O)[C@@H](NC(=O)CNC(=O)[C@@H](NC(=O)[C@@H](NC(=O)[C@@H](NC(=O)[C@@H](NC(=O)[C@@H](NC(=O)[C@H](C(C)C)NC(=O)[C@@H](NC(=O)[C@@H](NC(=O)[C@H]([C@H](O)C)NC…	Taspoglutide	3.00152
CCC(CCCCC(=O)NC(C(=O)NC(C(=O)NC(C(=O)NC1CCNC(=O)C(NC(=O)C(CCNCS(=O)(=O)[O-])NC(=O)C(NC(=O)C(NC(=O)C(NC(=O)C(NC1=O)CCNCS(=O)(=O)[O-])CC(C)C)CC(C)C)CCNCS(=O)(=O)[O-])C(O)C)CCNCS(=O)(=O)[O-])C(O)C)CCNCS(=O)(=O)[O-])C	Colistimethate sodium	3.00067
Clc1ccc(cc1)CN1CCN(CC1)CCCOc1ccc2c(c1)oc(=O)c(c2C)C	PICUMAST	2.99994
COP(=S)(SCN1C(=O)c2c(C1=O)cccc2)OC	SIMEDAN	2.99789
CNC(=O)Oc1nc2c([nH]1)cccc2	benzimate	2.99091
CC(c1c(C)n(n(c1=O)c1ccccc1)C)C	PROPYPHENAZONE	2.9906
CCC(=O)O[C@@]1(CC[C@@H]2[C@]1(C)C[C@H](O)[C@H]1[C@H]2C[C@@H](C2=CC(=O)C=C[C@]12C)C)C(=O)COC(=O)C	Methylprednisolone aceponate	2.98327
N#Cc1cc2cc(oc2c(c1)c1cccc(c1)F)[C@@](c1cncn1C)(c1ccc(cc1)C#N)N	PH-CBR-2016-001-HVAC-11959-0	2.98199
COC[C@@H]1C[C@@](N([C@@H]1c1nccs1)C(=O)c1ccc(c(c1)OC)C(C)(C)C)(C#N)Cn1cccn1		2.97808
OC(=O)c1cc(c(cc1NCc1ccco1)Cl)S(=O)(=O)N	furosemide AcuForm	2.97697
OC(=O)c1ccc(nc1)C#Cc1ccc2c(c1)C(C)(C)CCS2	Tazarotenic acid	2.97552
CCN(Cc1cccc(c1)OCC(OCc1cscc1)(C)C)C/C=C/C#CC(C)(C)C	FR 194738	2.9653
O=C(C(c1ccc2c(c1)Cc1c(O2)nc(cc1)C)C)OCC(=O)N(C)C	TILNOPROFEN ARBAMEL	2.9509
NCCCC[C@@H](C(=O)N[C@H](C(=O)N[C@H](C(=O)O)CCCNC(=N)N)Cc1ccc(cc1)O)NC(=O)[C@@H](NC(=O)[C@H]([C@H](O)C)N)CO		2.94682
COc1cc(ccc1Nc1c2ccccc2nc2c1cccc2)NS(=O)(=O)C	amsacrine, Bristol-Myers	2.94467
CCN1C[C@@]2(CC[C@@H]([C@]34C1[C@](O)([C@H]([C@H]23)OC)[C@@]1([C@@H]2[C@H]4C[C@@H]([C@@H]2OC)[C@H](C1)OC)O)OC)COC(=O)c1ccccc1N1C(=O)C[C@@H](C1=O)C	PH-399733	2.93638
COC(=S)NCCn1c(C)ncc1[N+](=O)[O-]	CARNIDAZOLE	2.92706
OC[C@@H]1NC(=O)[C@H](CCC(=O)N)NC(=O)[C@@H](NC(=O)[C@H](CCCNC(=N)N)NC(=O)[C@@H](NC(=O)[C@@H](NC(=O)[C@@H](NC(=O)[C@H]2N(C1=O)CCC2)CCC(=O)O)Cc1cnc[nH]1)CCC(=O)N)C(C)C	AZP-531	2.92614
OC(=O)CCCNC(=N)c1ccc(cc1)C(=O)/N=c\1/sc(c(n1C)C)C(=O)NCCC(=O)O	TS-943	2.92535
S[C@H]([C@@H](C(=O)O)S)C(=O)O	succimer	2.923
COc1c(oc2c1n(c1ccccc1)c1c2cc(cc1)OC)C(=O)Nc1nnn[nH]1	CI-922	2.91992
C#C[C@]1(O)CC[C@@H]2[C@]1(C)CC[C@H]1[C@H]2CC[C@@H]2[C@]1(C)CC[C@H](C2)O	Apoptone	2.91946
CCC(C(c1ccc(cc1)O)CC)C(c1ccc(cc1)O)C	BENZESTROL	2.91604
CC(N(Cc1c(C(C)C)c(=O)n(n1C)c1ccccc1)C)Cc1ccccc1	FAMPROFAZONE	2.91308
CN1CCCN/C/1=C\OC(=O)C(c1ccccc1)(C1CCCCC1)O	OXYPHENCYCLIMINE	2.91244
n1ccc(cc1)c1nc2c(n1)cc(cc2)c1ccc2c(c1)nc(n2)c1ccncc1	Ridinilazole	2.90407
Clc1ccc2c(c1)/C(=C(\c1cccs1)/O)/C(=O)N2C(=O)N	Tenidap sodium	2.90285
O=C(Nc1cc(C)ccc1F)Nc1ccc(cc1)c1cccc2c1c(N)n[nH]2	Linifanib	2.90274
CCC(C(C)(C)C)N(C(=O)c1cc(C)cc(c1)C)NC(=O)c1cccc(c1C)OC		2.90104
CC(COCC(N1CCCC1)CN(c1ccccc1)Cc1ccccc1)C	bepridil	2.89741
CC/C=C\C/C=C\C/C=C\C/C=C\C/C=C\C/C=C\CCC(=O)OCc1cccnc1	F-16915	2.89575
C1CCN(CC1)CCOc1cccc(c1)c1n[nH]c2c1cc(cc2)c1[nH]ncn1	JNK-401	2.89455
CN(CCCC1(CCCN(C)C)c2ccccc2Nc2c1cc(Cl)cc2)C		2.89336
NC1CCN(CC1)c1cccc(n1)Br	CM-57373	2.88502
ClNCCS(=O)(=O)[O-]	N-Chlorotaurine	2.88416
CS(=O)CC(=O)c1ccccn1	OXISURAN	2.88281
O=C(CCCC[C@@H]1SCC2C1NC(=O)N2)NCCS(=O)c1sc2n(n1)cc(n2)c1c(F)c(F)c(c(c1F)F)N=[N+]=[N-]	AEG-33783	2.87886
COc1ccc2c(c1)nc([nH]2)S(=O)Cc1ncc(c(c1C)OC)C	Esomeprazole sodium	2.87132
Clc1cc(ccc1/C=C/c1cccc(c1)C(=O)O)OCc1c(onc1c1c(Cl)cccc1Cl)C(C)C	GW 4064	2.86775
Cc1cccc(c1)N(C(=S)Oc1ccc2c(c1)cccc2)C	Tolnaftate	2.85958
CCC(=C(c1ccccc1)c1ccc(cc1)/C=C/C(=O)O)c1ccccc1	GW 5638	2.8583
CN1CCC(=C2c3ccccc3C=Cc3c2cccc3)CC1	Cyproheptadine hydrochloride	2.85747
COc1cc(cc(c1OP(=O)(O)O)OC)[C@H]1[C@H]2C(=O)OC[C@@H]2[C@@H](c2c1cc1OCOc1c2)O[C@@H]1O[C@@H]2CO[C@H](O[C@H]2[C@@H]([C@H]1O)O)C	Etoposide phosphate	2.8567
CC[C@@H]([C@H](N(C(=O)[C@H](C(C)C)NC(=O)[C@@H](N(C)C)C(C)C)C)[C@@H](CC(=O)N1CCC[C@H]1[C@@H]([C@H](C(=O)NCCc1ccccc1)C)OC)OC)C	soblidotin	2.85124
O=C(NC(=O)c1ccccc1[N+](=O)[O-])Nc1ccc(c(c1)Cl)Oc1ncc(cn1)Br	HO 221	2.84743
OCc1c(CSSCc2cnc(c(c2CO)O)C)cnc(c1O)C	PYRITHIOXIN	2.84556
NC(=N)c1cc2c(s1)cc(cc2)OC(=O)c1cccs1	BCX-1470	2.84023
COc1cc2nc(nc(c2cc1OC)N)N1CCN(CC1)C(=O)C1COc2c(O1)cccc2	(S)-doxazosin	2.83728
OCC(=O)[C@@]1(O)[C@@H](C)C[C@@H]2[C@]1(C)C[C@H](O)[C@]1([C@H]2CCC2=CC(=O)C=C[C@]12C)F	betamethasone	2.83376
OCC(c1ccccc1)C(=O)O[C@@H]1C[C@@H]2CC[C@H](C1)[N+]2(C)C(C)C	ipratropium bromide	2.82924
CC[C@@H]([C@@H]1C(=O)N[C@@H](C(=O)N1[C@@H](C(=O)N1CCOCC1)c1coc(n1)C)C1Cc2c(C1)cccc2)C	retosiban	2.82431
Clc1ccc(cc1)C1(O)c2ccccc2C2=NCCN12	mazindol	2.82378
CN(CCNC(=O)c1cccc2c1nccc2)C		2.82176
CN1CCC(=C2c3ccccc3SCc3c2cccc3)CC1		2.81981
CCCOc1cc(ccc1OC)[C@]1(C)CNC(=O)O1	MESOPRAM	2.80586
CCC(SSc1ncc[nH]1)C	PX-12	2.79819
NCC(c1cc(ccc1F)NS(=O)(=O)C)O	Garomefrine hydrochloride	2.79429
CCCN(C1CCc2c(C1)c(O)ccc2F)CCC	UH 301	2.78845
NCCCC[C@@H](C(=O)N1CCC[C@H]1C(=O)N[C@H](C(=O)N[C@H](C(=O)N[C@H](C(=O)N[C@H](C(=O)N[C@H](C(=O)N[C@H](C(=O)N[C@H](C(=O)N[C@H](C(=O)N[C@H](C(=O)N[C@H](C(=O)N1CCC[C@H]1C(=O)N[C@H](C(=O)N[C@H](C(=O)N1CCC[C@H]1C(=O)O)C(O)C)CCCN=C(N)N)C(O)C)C(C)C)C(CC)C)CC(=O)N)C)Cc1ccccc1)CC(C)C)Cc1ncnc1)C(C)C)C(C)C)NC(=O)[C@H](N)C	NBL-5788	2.78037
O[C@H]1C[C@H]2C([C@@]1(CC2)CS(=O)(=O)N(C1CCCCC1)C1CCCCC1)(C)C	MT-103	2.77771
OC(=O)c1snc(c1N)c1cccc(c1)C(F)(F)F	amflutizole	2.77657
O=C1C=C[C@]2([C@H](N1)CC[C@@H]1[C@@H]2CC[C@]2([C@H]1CC[C@@H]2C(=O)Nc1cc(ccc1C(F)(F)F)C(F)(F)F)C)C	dutasteride	2.77647
O=C(Oc1cccc(c1)c1cccc(c1)C(=O)N)NC1CCCCC1	KDS-4103	2.76897
CCC(=O)NS(=O)(=O)c1ccc(cc1)c1c(C)onc1c1ccccc1	parecoxib sodium	2.76322
OCC1OC(CC1O)n1cc(CC)c(=O)[nH]c1=O	EDOXUDINE	2.76216
CCOc1ccc(cc1)NC(=C)Nc1ccc(cc1)OCC	PHENACAINE	2.76159
Cc1ccc(c(c1)NC(c1ccccc1Cl)C(=O)N)[N+](=O)[O-]	analog of R-18893	2.75592
C=C(c1ccc(cc1)C1CCCCC1)C1COC2(OO1)C1CC3CC2CC(C1)C3	CDRI-99/411	2.75456
OCCNC(=O)C1CCCN(C1)c1nc(NCc2ccccn2)c2c(n1)scc2c1ccccc1	XEN-D101	2.75071
OCC(=O)C1CCC2C1(C)CC(=O)C1C2CCC2C1(C)CCC(C2)O	ALFADOLONE	2.74809
O=C1CC[C@@H]2[C@]1(C)CC[C@H]1[C@H]2CC=C2[C@]1(C)CC[C@@H](C2)OS(=O)(=O)[O-]	Prasterone sulfate	2.7434
Cc1ccc(s1)/C=N/NC(=S)N		2.73892
COc1ccc(c(c1)c1ccc(nc1N)NC(=O)c1cnn(c1)C)Cl		2.73675
NC(=S)N/N=C\1/c2ccccc2N(C1=O)C	METISAZONE	2.73274
CCCNC(=O)Nc1ccc(cc1C)OC		2.72447
O=c1cc(C)n(nc1N)c1ccc(cc1)C(F)(F)F		2.72154
C=CCOc1ccccc1OCC(CNC(C)C)O	oxprenolol	2.71816
N#C/C=C\1/c2ccc(cc2C(=Cc2c1cccc2)N1CCN(CC1)C)Cl		2.71337
COC(=O)c1oc(nc1C)c1ccc(cc1)Cl		2.70991
COc1ccc2c(c1)N(C[C@@H](CN(C)C)C)c1c(S2)cccc1	Levomepromazine	2.70908
Cc1csc(n1)Nc1nc2c([nH]1)cccc2	BAYP1455	2.70393
CNCCCN1c2ccccc2CCc2c1cc(Cl)cc2	chlordesipramine	2.69842
OC(=O)C(Oc1ccc(cc1C)SCc1sc(nc1C)c1ccc(cc1F)C(F)(F)F)(C)C	Sodelglitazar	2.69628
Clc1ccc(c(c1)Cl)Nc1ncc(c(c1)C1CC1)C(=O)NCC1CCOCC1	GSK-219346A	2.69517
Nc1ccc(cn1)S(=O)(=O)Nc1cccc2c1[nH]cc2Cl	ER-35745	2.69111
CC(=O)Oc1ccccc1C(=O)Nc1ncc(s1)[N+](=O)[O-]	NITAZOXANIDE	2.68958
Clc1cc2NCNS(=O)(=O)c2cc1S(=O)(=O)N	hydrochlorothiazide, Elan	2.68199
Oc1ccc(cc1)C(C(=O)N[C@@H]1C(=O)N2[C@@H]1SCC(=C2C(=O)O)CSc1nnc(s1)C)N	CEFAPAROLE	2.67697
COc1cccc2c1c(nn2Cc1cccc(c1)CNC(=O)C(O)(C)C)NS(=O)(=O)c1ccc(s1)Cl	GSK-2239633	2.6763
O=CNc1coc2c(c1=O)cc(c(c2)NS(=O)(=O)C)Oc1ccccc1	Iguratimod	2.67435
CC(=O)Oc1sc2c(c1)CN(CC2)C(c1ccccc1F)C(=O)C1CC1	prasugrel hydrochloride	2.6714
OCc1ccc(o1)C=O	5-HMF	2.67063
COc1cc(/C=C/c2ccc(cc2)O)cc(c1)OC	Pterostilbene	2.66639
Oc1cccc2c1C(=O)c1c(C2=O)cccc1O	DANTRON	2.66299
CN1CCC(CC1)C(=O)c1cccc(n1)NC(=O)c1c(F)cc(cc1F)F	lasmiditan	2.66209
CC[C@@H]1/C=C(\C)/C[C@H](C)C[C@H](OC)[C@H]2O[C@](O)([C@@H](C[C@@H]2OC)C)C(=O)C(=O)N2[C@H](C(=O)O[C@@H]([C@@H]([C@H](CC1=O)O)C)/C(=C/[C@@H]1CC[C@@H]([C@@H](C1)OC)Cl)/C)CCCC2	Pimecrolimus	2.66167
CO[C@H]1C[C@H](O[C@H]2[C@@H](C)/C=C/C=C/3\CO[C@H]4[C@]3(O)[C@@H](C=C([C@H]4O)C)C(=O)O[C@H]3C[C@@H](C/C=C/2\C)O[C@]2(C3)CC[C@@H]([C@H](O2)[C@H](CC)C)C)O[C@H]([C@@H]1O[C@H]1C[C@H](OC)[C@H]([C@@H](O1)C)O)C	ivermectin 1%	2.66052
Fc1cc(F)c(c(c1)F)OCc1ccccc1C1CCNCC1	TD-9855	2.65791
COCCOC(=O)C(=Cc1ccc(cc1)N1CCCCC1)C#N		2.63076
Fc1ccc2c(c1)c(C)c(s2)S(=O)(=O)Nc1ccc(cc1S(=O)(=O)C)c1scc(n1)C(=O)O	TY-51469	2.62594
CC(=CCN(c1ccc(cc1)CCC(C)(C)C)C1CCN(CC1)Cc1ccc(cc1)N(C)C)C	PD 0204318	2.62447
CCO[C@H](C(=O)O)Cc1ccc(cc1)OCCn1c(C)ccc1c1ccc(cc1)SC	Saroglitazar	2.62069
O=C(Nc1ccccc1)OCC(OC(=O)Nc1ccccc1)CN1CCCCC1	DIPERODON MONOHYDRATE	2.60824
Cc1cc2c(cc1F)nc1c(c2N)CCCC1		2.6049
NC(=O)/C=C/c1ccccc1C	U 77863	2.60343
O=C(N1CCN(CC1)C(=O)[C@@H]1NCCN(C1)C(C)(C)C)Nc1ccc(c(c1)F)Cl	PH-CBR-2016-001-HVAC-09332-0	2.60284
CCCN(C(=O)C(NC(=O)c1ccc(cc1)Cl)Cc1ccc(cc1)OCCCN1CCN(CC1)C)CCC	CR-725	2.60266
COc1cc2nc(nc(c2cc1OC)N)N1CCNCC1		2.60119
O=C(c1ccc(cc1)/C=C/c1cnc2c(c1)cccc2)Nc1cc(n(c1)C)C(=O)Nc1cc(n(c1)C)C(=O)NCCN1CCOCC1	MGB-BP-3	2.6008
OC(=O)COc1cccc(c1)CN(S(=O)(=O)c1cccnc1)Cc1ccc(cc1)n1cccn1	taprenepag	2.60073
O=C(N[C@H](C(=O)Nc1c(Br)cc(cc1CN(C1CCCCC1)C)Br)CSSC[C@@H](C(=O)O)NC(=O)OCc1ccccc1)OCc1ccccc1		2.59935
COc1cccc(c1)C1(CCCC=C1)CCN(C)C	Ro-12-9150	2.59899
COCC1OC(=O)N(C1)c1ccc(cc1)OCc1cccc(c1)C(=O)N		2.59802
O[C@H]1CC[C@]2(C(=C1)CC[C@H]1[C@@H]2CC[C@@]2([C@H]1CC=C2)C)C	Aloradine	2.59615
CCOC(=O)c1c(CSc2ccccc2)n(c2c1c(CN(C)C)c(O)c(c2)Br)C	Arbidol	2.59535
CCCCN(C(=O)CN1C[C@@H]([C@H]([C@@H]1c1ccc(cc1)OC)C(=O)O)c1ccc2c(c1)OCO2)CCCC	atrasentan	2.59503
CCCCCCCCCCCCCCOS(=O)(=O)[O-]	Sodium tetradecyl sulfate	2.59349
C[C@H]1O[C@@H](C)[C@@H]2N(C1)c1c(CC32C(=O)NC(=O)NC3=O)cc2c(c1F)onc2N1[C@H](C)COC1=O	AZD-0914	2.59345
NCc1cccc(c1)C1CCN(CC1)C(=O)c1ccc(o1)C#Cc1ccccc1F	AVE-5638	2.58999
OC(=O)c1ccc(c(c1)O)Oc1ccc2c(c1)COB2O	AN-3232	2.58926
CN(CCc1sc2c(c1[C@H](c1ccccn1)C)cccc2)C	NBI-75043	2.58163
CCC(c1ccccc1)C(=O)OCCN(CC)CC	BUTETAMATE	2.58159
CC(C(=O)c1ccc(cc1)C)CN1CCCC1		2.56539
OC(CN1CCCCC1)CO/N=C(/c1cccnc1)\Cl	BIMOCLOMOL	2.56112
C=CCC(C(=O)NC(=O)N)C(C)C	APRONAL	2.55929
O=C(N[C@@H]1C(=O)N2[C@@H]1SC([C@@H]2C(=O)O)(C)C)COc1ccccc1	Phenoxymethylpenicillin	2.54969
Clc1ccc(cc1)c1ccc(cc1Cl)Cl	CB-28	2.54467
Cc1cccc(n1)c1[nH]c(nc1c1ccc2n(c1)ncn2)CNc1ccccc1F	EW-7197	2.54085
O=C(c1cc(NCCN2CCCC2)c(c(c1)N1CCN(CC1)c1ncnc2c1c(Br)n[nH]2)C)CCC(F)(F)F	XL-418	2.53865
OCC(NCc1ccc2c(c1)c1cccc3c1c2ccc3)(CO)C		2.53419
CN(CCC1(C)OCCC2=C1Cc1c2cccc1)C	PIRANDAMINE	2.53307
CN(CCNC(=O)c1nccc2c1cc1c(c2C)n(c2c1cc(O)cc2)C)C	S-16020-2	2.52763
COCCN(CCOc1ccc2c(c1)cc([nH]2)c1cc2ccccc2[nH]c1=O)C		2.52749
CCCC(=O)O[C@@]1(CC[C@@H]2C1(C)C[C@H](O)[C@H]1[C@H]2CCC2=CC(=O)CCC12C)C(=O)CC	RESOCORTOL BUTYRATE	2.52475
Fc1ccc(cc1)Oc1ccc(cc1)CN(C(=O)Nc1c(cc(nc1S(=O)(=O)C)C)S(=O)(=O)C)C1CCCCCC1	FR 190809	2.52041
COc1cc(OC)cc(c1/C=C/S(=O)(=O)Cc1ccc(c(c1)NCC(=O)O)OC)OC	Rigosertib sodium	2.5178
CCN1CCC(C1)CN1c2ccccc2Sc2c1cccc2		2.51676
COC(=O)[C@@H]1C[C@H](OC(=O)C)C(=O)[C@H]2[C@@]1(C)CC[C@@H]1[C@]2(C)C[C@H](OC1=O)c1cocc1	Salvinorin A	2.51658
CCC(c1ccccc1)(CC(=O)N)O	HEPP	2.51506
Nc1ccc(cc1)S(=O)(=O)Nc1noc(c1C)C	Sulfatroxazole	2.51323
C=COCC(F)(F)F	FLUROXENE	2.50762
CN1[C@@H]2CC[C@H]1C[C@H](C2)OC(c1ccccc1)c1ccccc1	Benzatropine mesilate	2.50428
OC[C@@H](C(=O)O)NC(=O)[C@H](CC(=O)O)NC(=O)CNC(=O)[C@H](CCCNC(=N)N)N	DU-728	2.50271
C[C@]12CCC(=C[C@@H]1C(=O)C[C@@H]1[C@@H]2CC[C@]2([C@H]1CCC2=O)C)NOCCN	istaroxime	2.50099
CO[C@@H]1/C=C/C=C(\C)/Cc2cc(OC)c(c(c2)N(C(=O)C[C@@H]([C@]2([C@H]([C@@H]([C@@H]3C[C@@]1(O)NC(=O)O3)C)O2)C)OC(=O)C(C)C)C)Cl	Ansamitocin P3	2.49782
CCn1c(cc2c1cc(O)cc2Cl)c1c(Cl)cc(cc1Cl)O	D-15413	2.49373
Clc1ccc(cc1)C1CNC(C1)C1CC1		2.4914
O=C(c1ccc(cc1)CN1CCOCC1)N1CCN(CC1)C1CC1	Bavisant	2.48836
CSCC[C@@H](C(=O)N[C@H](C(=O)N[C@H](C(=O)N[C@H](C(=O)N1CCC[C@H]1C(=O)N[C@H](C(=O)N[C@H](C(=O)N[C@H](C(=O)O)C(C)C)CO)Cc1ccccc1)C(C)C)CCC(=O)N)CC(=O)O)NC(=O)[C@H]([C@H](CC)C)N	Disomotide	2.48754
COc1ccc(cc1)CC(NCC(c1ccc(c(c1)CO)O)O)C	SALMEFAMOL	2.48163
CCCCCCCCCCCCCCCCCC(c1ccc(c(c1)Cl)C(=O)O)O	lodelaben	2.48016
CCN(CCCN(C1Cc2c(C1)cccc2)c1ccccc1)CC	aprindine	2.47594
COc1cccc(c1F)c1c(=O)n(C[C@@H](c2ccccc2)NCCCC(=O)O)c(=O)n(c1C)Cc1c(F)cccc1C(F)(F)F	NBI-56418	2.47425
CCOC(=O)Nc1ccc2c(c1)N(C(=O)CCN(CC)CC)c1c(S2)cccc1	etacizin	2.4726
NC1CCN(CC1)c1cccc2c1nc(cc2)n1cnc2c1ccc(c2)OCC1(C)COC1	crenolanib	2.46989
Nc1ccc(c(c1)O)C(=O)Oc1ccccc1	PHENYL AMINOSALICYLATE	2.46216
CN(Cc1ccc2c(n1)c(O)c(cc2Cl)Cl)C	PBT-1033	2.45898
CC(C(OC(=O)N)C)C(OC(=O)N)C	PENTABAMATE	2.45638
CN1CCN(CC1)c1ncc(c(n1)c1ccccc1C)N(C(=O)C(c1cc(cc(c1)C(F)(F)F)C(F)(F)F)(C)C)C	R-1500	2.45254
OC(C12CC[N+](CC1)(CC2)CCOCc1ccccc1)(c1ccccc1)c1ccccc1	UMECLIDINIUM BROMIDE	2.44716
OCC1CS[As](S1)c1ccc(c(c1)NC(=O)C)O	ARSTHINOL	2.44245
CCCC(C(=O)O[C@@H]1C[C@@H]2CC[C@H](C1)[N+]2(C)C)CCC	Octatropine methylbromide	2.44073
O=C(c1c[nH]c2c1cccc2)OCCN1CCCCC1	SB 203186	2.43253
O=C(Cc1ccccc1)NC(=O)N	PHENACEMIDE	2.42963
CC(=O)OCOC(=O)C1N2C(=O)C(C2SC1(C)C)NC(=O)Cc1ccccc1	PENAMECILLIN	2.42949
Fc1ccc2c(c1)n(C)cc(c2=O)S(=O)C	flosequinan	2.42573
NC(=O)C[C@@H]1N=C(c2ccc(cc2)Cl)c2c(c3c1onc3C)cccc2	CPI-0610	2.42431
Cn1nc(c(c1)CN1CCC(CC1)c1ccc(cc1)C(=O)Nc1ccccc1N)C	AZD-9468	2.42162
OCC1OC(CC1N=[N+]=[N-])n1cc(C)c(nc1=O)N	CS-92	2.42148
COc1ccc2c(c1)c(O)c(cn2)C(=O)NC1=NCCS1	RU-43028	2.42145
OC(c1ccc(c(c1)O)O)CNCCCCCCNCC(c1ccc(c(c1)O)O)O	hexoprenaline	2.41883
CC([C@@H]1CC[C@H](CC1)C(=O)N[C@@H](C(=O)O)Cc1ccccc1)C	nateglinide	2.41452
COc1nc(CNC(=O)c2cc(cnc2c2ccccn2)c2cncc(c2)Cl)ccc1OC	MK-1064	2.41433
CCCC[C@H]1C(=O)O[C@H](C)[C@@H](C(=O)O[C@H]([C@H]1CC(=O)CC(C)C)C)N(C(=O)c1cccc(c1O)NC=O)C	Antimycin A3	2.41371
NC(=O)C1CCN(CC1)C(=O)Cn1c(=O)sc2c1cc(Cl)cc2		2.40904
COC(=O)C1=C(C)NC(=C(C1c1cccc(c1)[N+](=O)[O-])C(=O)OCCN1CCN(CC1)c1ccc(c(c1)Cl)Cl)C	P-0285	2.40456
OCCONC(=O)c1cc(CN2OCCCC2=O)c(c(c1Nc1ccc(cc1F)I)F)F	CH-4987655	2.39759
O=C1C=CC2(C(=C1)[C@@H](F)C[C@@H]1[C@]2(F)[C@@H](O)CC2([C@H]1C[C@H]([C@]2(O)C(=O)SC1CCOC1=O)C)C)C	Zoticasone	2.39362
OC(=O)[C@@H]1N2C(=O)[C@H]([C@H]2SC1(C)C)NC(=O)C1(N)CCCCC1	ciclacillin	2.39324
[O-][N+](=O)O[Ga](O[N+](=O)[O-])O[N+](=O)[O-]	Gallium(III) nitrate hydrate	2.39037
O=C(Nc1cnc2c(c1c1ccccc1Cl)cc(c(c2)C)C)Nc1ccc(cc1F)F	TMP 153	2.38725
OC[C@H](Cc1ccc(cc1)O)NC(=O)CCc1ccc(cc1)C		2.3828
CCOc1ccccc1n1c(C)ccc1c1ccccc1		2.38062
OCC(CCCCOCCCCC(CO)(C)C)(C)C	ESP-24232	2.38047
O=C1/C(=C/c2cnc3n2CCOC3)/[C@@H]2N1C(=CS2)C(=O)O		2.38031
O=C([C@H](Cc1ccccc1F)NC(=O)c1cc2[nH]cnc2cc1C(=O)NCC1CCCCCC1)Nc1cc(cc(c1)C(=O)O)C(=O)O	PH-CBR-2016-001-HVAC-05724-0	2.37985
c1ccc(cc1)C(c1ccccn1)Nc1nc2c(o1)cccc2		2.37793
COC1CC(OC(C1OC1CC(OC)C(C(O1)C)OC1CC(OC)C(C(O1)C)OC1CC(OC)C(C(O1)C)OC1OC(CO)C(C(C1O)O)O)C)OC1C(OC)CC(OC1C)OC1CCC2(C(=CCC3C2CC(OC(=O)/C(=C/C)/C)C2(C3(O)CCC2C(=O)C)C)C1)C		2.37399
S=c1[nH]cnc2c1[nH]cn2	Mercaptopurine	2.37344
OCC(=O)N1CCC(=CC1)c1ccc(cc1)C1=NO[C@@H](C1)CNC(=O)C	PNU 171832	2.37159
O=CC1=C(C)C=CCC1(C)C	Safranal	2.36891
Oc1c(ccc2c1cccc2)Cc1ccccc1	DUP 654	2.36572
OCC(c1ccccc1)C(=O)OC1CC2CCC(C1)[N+]2(C)C(C)C	ipratropium bromide, Premaire	2.36511
NC(=N)NCCC[C@@H](C(=O)NCCc1ccccc1)NC(=O)[C@H](Cc1c2cc(cc(c2nc1C(C)(C)C)C(C)(C)C)C(C)(C)C)NC(=O)[C@H](CCCNC(=N)N)N	LTX-9	2.36409
O=C1CN(C(=O)N1)/N=C/c1ccc(o1)c1ccc(cc1)[N+](=O)[O-]	dantrolene sodium	2.36346
COc1ccc(cc1)Cc1cccc(c1)c1c(=O)[nH]c2c(c1OC(=O)C)ccc(c2)Cl	AcL-703	2.36233
CCOC(=O)C1CCN(CC1)c1nc(ccc1[N+](=O)[O-])N(S(=O)(=O)c1cccc2c1cccc2)C		2.35249
O=c1[nH]nc2n1ccc1c2cc(c(n1)c1ccc(cc1)C1(N)CCC1)c1ccccc1	MK-2206	2.35221
OC[C@H]1O[C@H](C[C@@H]1O)n1cc(I)c(=O)[nH]c1=O	idoxuridine, APR	2.34974
OC(=O)Cc1ccccc1COc1ccc2c(c1)cc(o2)c1scc(n1)C(C)(C)C	FK-011	2.34788
O=C1NC2=Nc3c(CN2C1C)c(C)c(cc3)Br	Ro-15-2041	2.34625
CC[C@H]1CC2CN3C1[C@](C2)(C(=O)OC)c1[nH]c2c(c1CC3)cccc2	Coronaridine	2.34457
O=c1ccc2c(o1)cc1c(c2)cco1	Psoralen	2.34296
CC([N+](C)(C)C)CN1c2ccccc2Sc2c1cccc2	thiazinamium chloride	2.33762
CCOC(=O)[C@@H]1CCC(=O)N1		2.33567
CCOC(=O)[C@H](Cc1ccc(c(c1)O)O)N	Etilevodopa	2.33203
O[C@@H]1CC[C@@H](CC1)N(c1cc(sc1C(=O)O)C#CC(C)(C)C)C(=O)[C@@H]1CC[C@H](CC1)C	lomibuvir (tablet)	2.33083
COC(=O)N[C@@H](C(C)(C)C)C(=O)NN(Cc1ccc(cc1)c1ccccn1)C[C@@H]([C@H](Cc1ccccc1)NC(=O)[C@H](C(C)(C)C)NC(=O)OC)O	atazanavir sulfate	2.32981
C[C@H]([C@H]1C(=O)N2[C@@H]1[C@@H](C)C(=C2C(=O)O)S[C@@H]1CN[C@@H](C1)CNS(=O)(=O)N)O	Doripenem	2.32896
CC(=C)CNc1ccc(cc1)C(C(=O)O)C	alminoprofen	2.32832
COc1cccc(c1)N(C(=O)CNC(=O)Nc1cccc(c1)C(C(=O)O)C)CC(=O)N(c1ccccc1)C	RPR-102681	2.32698
NCCCN1C(=O)NC2(C1=O)CCCCC2		2.3261
OC(COc1cc(C)ccc1Cl)CNC(C)(C)C	Bupranolol	2.32347
OC1CCN(CC1)c1c(F)cc2c3c1CCC(n3cc(c2=O)C(=O)O)C	nadifloxacin	2.32151
Fc1ccc(cc1)C(C(c1cccnc1)c1cccnc1)c1cccc(n1)NS(=O)(=O)C	MK-0448	2.31779
C/C(=C\CC/C(=C/CCC(=O)C)/C)/CC/C=C(/CCC=C(C)C)\C	tepre	2.31504
CC(NCC#N)CCc1ccccc1		2.31366
S1CCS[Bi-]21SCCS2	Bismuth ethanedithiol	2.31039
CCOC(=O)C1CCN(CC1)c1nc(ccc1[N+](=O)[O-])N(S(=O)(=O)c1ccc2c(c1)cccc2)C		2.30872
O=C(c1cn(C)c2c(c1=O)cc(s2)CN1CCOCC1)NCc1ccc(cc1)Cl	PNU-243672	2.30777
Nc1ccn(c(=O)n1)[C@H]1[C@H](O)[C@@H](C(=C1F)CO)O	RX-3117	2.30486
N=C(NCCCc1[nH]cnc1)NCCC(c1ccccn1)c1ccc(cc1)F	ARPROMIDINE	2.30244
COCCOC(=O)N1CCN([C@H](C1)C(=O)NO)S(=O)(=O)c1cc(F)c(c(c1)F)Oc1ccc(cc1)Cl	XL-784	2.30136
CCCCC[C@@H](/C=C/[C@H]1CCC(=O)[C@@H]1CCCCCCC(=O)O)O	AY-23578	2.29847
CCCOC(=O)c1ccc(cc1)N	propyl 4-aminobenzoate	2.29637
CCN1CCN(CC1)CCC(=O)Nc1ccccc1C		2.29593
CC(Cn1nc(c(c1CC(=O)O)c1ccccc1)c1ccccc1)C	BUFEZOLAC	2.29547
OC[C@H]1NC[C@@H]([C@H]([C@@H]1O)O)O	1-Deoxynojirimycin	2.29473
O=C(Nc1ccc(cc1C(=O)c1ccccc1)Cl)CN(CC(=O)O)CC(=O)O	ARCLOFENIN	2.29453
NCC(C(=O)Nc1ccc2c(c1)ccnc2)c1ccc(cc1)COC(=O)c1ccc(cc1C)C	AR-13324	2.28835
CCN(CCNC(=O)c1cc(Cl)c(cc1OC)N)CC	metoclopramide, Diffucap	2.28789
NCCCC[C@H](C(=O)N[C@@H](C(=O)N[C@@H](C(=O)N[C@@H](C(=O)N[C@@H](C(=O)N[C@H](C(=O)O)Cc1ncnc1)CCCNC(=N)N)CCCNC(=N)N)CC(C)C)C(C)C)NC(=O)C1CSSCC(NC(=O)CNC(=O)C(NC(=O)CNC(=O)C(NC(=O)C(C(C)C)NC(=O)C(NC(=O)C(NC(=O)C2CCCN2C(=O)C(CO)N)CCCCN)CCSC)CCC(=O)N)CO)C(=O)NC(Cc2ccccc2)C(=O)NCC(=O)NC(CCCNC(=N)N)C(=O)NC(CCCCN)C(=O)NC(CCSC)C(=O)NC(CC(=O)O)C(=O)NC(C(=O)NC(C(=O)NC(C(=O)NC(C(=O)NC(C(=O)NC(C(=O)NCC(=O)NC(C…	Nesiritide	2.28105
Cc1nc2ccc(cc2c2c1CCN2c1ccc(cc1)C(C)C)Oc1ccccc1		2.28074
O=C1NC(Nc2c1cccc2)c1ccc(cc1)c1ccccc1	SC-2-71	2.27872
OCc1cc2CCC(Nc2cc1[N+](=O)[O-])CNC(C)C	Oxamniquine	2.27569
COCc1nnc(n1c1c(Cl)c(Cl)cc2c1nc(=O)c(=O)n2)c1cccnc1	UK 315716	2.27424
CC(N(C(C)C)CCC(c1ccccc1)c1ccccc1)C	DIISOPROMINE	2.27303
Cl[Te-]1(Cl)(Cl)OCCO1	ammonium trichlorotellurate	2.27135
C[C@H](Cn1cnc2c1ncnc2N)OCP(=O)(OCOC(=O)OC(C)C)OCOC(=O)OC(C)C	tenofovir disoproxil fumarate	2.2713
CN(CCCn1c2CCCCCCc2c2c1cccc2)C	Iprindole	2.27044
Oc1ccc(cc1)[C@H]1Cc2c([C@H]1NC(=O)C(c1ccccc1)c1ccccc1)cccc2		2.26647
OC(CC(=O)NCCC(=O)O)CNC(=O)CCCCCCNC(=N)N	N 563	2.26644
CCCNCC(c1oc2c(c1CCc1ccccc1)cccc2)O	GE 68	2.26446
COc1ccc(cc1OC1CCCC1)C1CNC(=O)C1	rolipram	2.26408
COC(=O)Nc1cccc(c1)c1ccc(cc1F)N1C[C@@H](OC1=O)CNC(=O)C		2.26266
CSc1ccc2c(c1)N(CCC1CCCCN1C)c1c(S2)cccc1	thioridazine	2.2616
CCCCNC(=O)NS(=O)(=O)c1ccc(cc1)N	CARBUTAMIDE	2.25795
COc1ccc(cc1)CC(N(CCCCOC(=O)c1ccc(c(c1)OC)OC)CC)C	mebeverine	2.25774
Nc1nccc2c1ncn2[C@@H]1C=C([C@H]([C@H]1O)O)CO	DEAZANEPLANOCIN A	2.25484
N[C@H]1CCN(C1)c1nc2n(cc(c(=O)c2c(c1F)C)C(=O)O)c1ccc(cc1F)F	BMY 43748	2.25407
NC(=O)[C@@H]1CCCN1	L-PROLINAMIDE	2.25401
NC(=S)NS(=O)(=O)c1ccc(cc1)N	SULFATHIOUREA	2.25292
CCCC(=O)OCOC(=O)C1=C(C)NC(=C(C1c1cccc(c1Cl)Cl)C(=O)OC)C	Clevidipine	2.25198
CC(=O)OCCN(C(=O)[C@H]1CN(C)[C@H]2C(C1)c1cccc3c1c(C2)c[nH]3)CCOC(=O)C	AWD 5239	2.24826
CC(=O)SCC(C(=O)O)CC(=O)c1ccc(cc1)C	Esonarimod	2.24672
CCOC(=O)c1ccccc1NC(=O)c1ccc(cc1)NC(=O)CC		2.24653
CCN(CCOCC(COc1ccccc1OC)OCCN(CC)CC)CC	CRE-1087	2.24598
OC(=O)c1ccc(cc1)C#Cc1ccc2c(c1)C(C)(C)CC(O2)(C)C	AGN-191379	2.24447
OCC(CCCC(=O)C)(C)C		2.24352
CC/C(=C(\c1ccc(cc1)OP(=O)(O)O)/CC)/c1ccc(cc1)OP(=O)(O)O	DIETHYLSTILBESTROL DIPHOSPHATE	2.2422
N=C(NC(=N)N)NCCc1ccccc1	PHENFORMIN	2.24069
O=C(c1ccc(o1)Cl)N1CC2C(C1)CNC2	AZD-1446	2.23985
CCCCNc1cc(cc(c1Oc1ccccc1)S(=O)(=O)N)C(=O)O	bumetanide	2.23866
CN(c1nc(nc(n1)N(C)C)N(C)C)C	altretamine	2.23802
OCC(NCc1ccc2c3c1cccc3c1c2cccc1)(CO)C	773U82	2.23177
COc1c(CC=C(CCC(=O)OCCN2CCOCC2)C)c(O)c2c(c1C)COC2=O	mycophenolate mofetil	2.22353
CCc1ccc(c(c1)CC(=O)O)Nc1c(F)c(F)cc(c1F)F	Robenacoxib	2.2229
O=C(N[C@H](C(=O)N[C@H](C(=O)O)C(C)C)CC(=O)O)CCCOc1ccc(cc1)C(=N)N	FK 633	2.21909
O=C(c1cc2c(n1)cccc2)N[C@@H]1N=C(c2ccccc2F)c2c3N(C1=O)CCc3ccc2	FK480	2.21884
COn1cc(C(=O)O)c(=O)c2c1cc1OCOc1c2	Miloxacin	2.2161
COc1cc2c(cc1OC)CCN(C2C)CCc1ccc(cc1)N	VERADOLINE HYDROCHLORIDE	2.21433
O=C1CCC2=C3[C@H](C[C@]4([C@H]([C@@H]3CCC2=C1)CC[C@@]4(O)C(C(F)(F)F)(F)F)C)c1ccc(cc1)C(=O)C	Lonaprisan	2.21185
OC[C@H]([C@H](C1OC(OCC2OC(OC3C(CO)OC(C(C3O)O)O)C(C(C2O)O)O)(CC(C1NC(=O)C)O)C(=O)[O-])O)O	6'-Sialyllactose	2.21148
CC(Cc1c[nH]c2c1cc(OCc1cccs1)cc2)N	BW 723C86	2.21133
CCOc1cccc(c1)C(n1nc(c2c1c1ccc(cc1CC2)OCc1cncnc1)C(=O)O)CC	ATZ 1993	2.20155
CCOC(=O)CC1COc2c(C1)cc(cc2)NC(=O)c1ccc(cc1)C(=N)N1CCOCC1	MS 180	2.19926
O=C([C@H]1CN(CCN1S(=O)(=O)c1ccc(cc1)C(F)(F)F)c1sc2c(n1)nc(nc2)C1CC1)NCc1ccc(c(c1)F)OC(F)(F)F	JTK-853	2.1977
C#C[C@]1(O)CC[C@@H]2[C@]1(C)CC[C@H]1[C@H]2CCc2c1ccc(c2)OS(=O)(=O)C(C)C	ethinyl estradiol sulfonate	2.19711
OC[C@H]1OC([C@@H]([C@@H]1O)O)n1c(Cl)nc2c1ncnc2N	8-Cl-Ado	2.19608
Fc1cccc(c1Cn1nnc(c1)C(=O)N)F	rufinamide (oral suspension)	2.19316
Brc1c(ccc2c1nccn2)NC1=NCCN1	BRIMONIDINE TARTRATE	2.19048
OCC(=O)[C@@]1(O)CC[C@@H]2[C@]1(C)C[C@H](O)[C@H]1[C@H]2CCC2=CC(=O)C=C[C@]12C	Prednisolone	2.18797
N#Cc1cccc(c1)C1C=C(NC2=C1C(=O)CCC2)C(F)(F)F	AZD 0947	2.18684
COc1cc(/C=C/C(=O)O[C@H]2CC[C@]34C(C2(C)C)CCC2C4(C3)CC[C@]3([C@@]2(C)CC[C@@H]3[C@@H](CCC=C(C)C)C)C)ccc1O	GAMMA ORYZANOL	2.18611
O[C@@H]1C[C@H](N(C1)C(=O)C)C(=O)O	OXACEPROL	2.18604
CN1CCN(CC1)Cc1cccc2c1ccn2S(=O)(=O)c1ccccc1Br	SUVN-502	2.18442
CCCCC/C=C\C/C=C\CCCCCCC(C(=O)O)O	Sodium 2-hydroxylinoleate	2.17929
OC[C@H]1O[C@@H](c2ccc(c(c2)Cc2ccc(cc2)OCCOC2CC2)Cl)[C@@H]([C@H]([C@@H]1O)O)O	bexagliflozin	2.17713
COc1ccc2c(c1)[C@@]13CCCC[C@@H]3[C@H](C2)N(CC1)C	Dextromethorphan HBr	2.17657
CC[C@@]1(CO)CCCN2[C@@H]1c1[nH]c3c(c1CC2)cccc3	Vintoperol	2.1736
Clc1ccc(cc1)OC(C(=O)OCCN1CCN(CC1)CCCN1c2ccccc2Sc2c1cc(cc2)C(F)(F)F)(C)C	GYKI-22441	2.16934
CCCn1c2nc([nH]c2c(=O)n(c1=O)C1CC1)c1ccc(nc1)N(C(=O)c1cccnc1)CC	ATL-801	2.169
Clc1ccc(cc1)S(=O)(=O)N(C1CCCCNC1=O)Cc1ccc(cc1)Br	ELN-318463	2.16876
C1CCN(CC1)CCOc1ccc(cc1)c1cnc2n(c1)ncc2c1ccncc1	Compound C	2.16416
CNC(=O)O[C@H]1COc2c([C@@H]1NC(=O)c1ccc(cc1)F)cc(cc2)N1CCN(CC1)C1COC1	LY-3000328	2.16192
O=C(N[C@@H]1C(=O)N2[C@@H]1SCC(=C2C(=O)O)CSc1nnnn1C)CSC(F)(F)F	Cefazaflur	2.16191
OC[C@H]1O[C@@H](Oc2nnc(c2Cc2ccc(cc2C)OCCCNCCC(=O)N)C(C)C)[C@@H]([C@H]([C@@H]1O)O)O	KGA-2727	2.15805
Brc1ccc(cc1)C[C@@]1(C)N(C)C(=O)N(C1=O)c1cc(Cl)cc(c1)Cl	BIRT-0377	2.15786
CCOC(=O)CN(Cc1ccccc1O)CCN(Cc1ccccc1O)CC(=O)O	CGP 75254A	2.1567
N1CCN(CC1)c1cccc2c1OCCO2	eltoprazine	2.15442
CN1CCCC1c1cccnc1	nicotine, Neuraltus	2.15386
O=C(c1cccc(c1F)C)N1CCCC1C(O)(C)C		2.15363
COc1cc(ccc1n1c[n+](c(c1)C)COP(=O)(O)[O-])/C=C/1\CCCN(C1=O)[C@H](c1ccc(cc1)F)C	E-2212	2.14989
COC(C(=O)O)Cc1ccc(cc1)OCCCOc1ccc(cc1)Oc1ccccc1	NAVEGLITAZAR	2.14761
CCC[C@@H](c1cccnc1)Nc1nc(ncc1C)c1ccc(c(c1)OC)NC(=O)NCC	Lexibulin hydrochloride	2.14383
COCC(n1nnc2c1cc(C)nc2Nc1c(C)cc(cc1Cl)C)COC	DMP 695	2.14331
NC(=O)c1ccc2n(n1)c(c1ccccc1)c(n2)c1ccc(cc1)C1(N)CCC1	BAY-1125976	2.14285
O=C1CCC2C3(C1)CCN(C2Cc1c3cc(O)cc1)C	Zippeline, derivative of	2.14227
COc1cc(Cc2cnc(nc2N)N)c2c(c1OC)OC(C=C2)C1CC1	iclaprim mesylate	2.1417
CCN(CCn1cnc2c1c(=O)n(C)c(=O)n2C)CC	ETAMIPHYLLIN	2.13674
CCN(CCn1c(=N)onc1c1ccccc1)CC	IMOLAMINE	2.13623
[O-][N+](=O)c1ccc(o1)/C=N/NC(=O)c1cc(cc(c1O)[N+](=O)[O-])[N+](=O)[O-]	NIFURSOL	2.13467
O=C[C@@]12CC[C@@H](C[C@@]2(O)CCC2C1CC[C@]1([C@]2(O)CC[C@@H]1C1=CC(=O)OC1)C)O	Strophanthidine	2.13295
COC(=O)C1=C(C)NC(=C(C1c1ccccc1[N+](=O)[O-])C(=O)OC(C)C)C		2.13286
OC[C@H]1O[C@@H](Oc2nn(c(c2Cc2ccc(cc2)OC(C)C)C)C(C)C)[C@@H]([C@H]([C@@H]1O)O)O	Remogliflozin	2.13138
N#CC(c1cccnc1C)N1CCN(CC1)C(=O)CNC(c1ccccc1)c1ccccc1	UR 12460	2.12934
OC1CCN(CC1)Cc1cccc(c1)Nc1ncnc2c1cccc2		2.12876
O=C(c1ccc(cc1)Cl)NCCCN1CCOCC1	Eprobemide	2.12655
Fc1ccc(cc1)c1sc(nc1C(=O)N1CCCC[C@H]1CNC(=O)c1cccc2c1cco2)C	GW-649868	2.1259
CCCCC(=O)O[C@@]1(CC[C@@H]2[C@]1(C)C[C@H](O)[C@H]1[C@H]2CCC2=CC(=O)CC[C@]12C)C(=O)CO	Hydrocortisone valerate	2.12357
CS(=O)(=O)OCCCNCCCOS(=O)(=O)C	improsulfan tosilate	2.12263
CCOC(=O)C[C@]1(CCC)OCCc2c1[nH]c1c2c(C#N)ccc1C		2.12077
Clc1ccc2c(c1)nc(c(c2O)C(=O)C1CC1)O	L 701252	2.12017
ClCOC(=O)[C@@]1(O)CC[C@@H]2[C@]1(C)C[C@H](O)[C@H]1[C@H]2CCC2=CC(=O)C=C[C@]12C	LOTEPREDNOL	2.11929
CN(CCc1ccccc1)CCc1ccccc1	DEMELVERINE	2.11717
Cc1cnc(s1)NC(=O)C1=C(O)c2ccccc2S(=O)(=O)N1C	meloxicam	2.11624
Fc1ccc(cc1)c1cncc(c1)CNCC1CCc2c(O1)cccc2	SARIZOTAN	2.11613
N#Cc1c(cccc1C(F)(F)F)Oc1cccc(c1)OS(=O)(=O)CCCC(F)(F)F	BAY-59-3074	2.11587
ClCC[N+]12CC[N+](C2)(CC1)CCCl	DABIS maleate	2.11553
O=C(c1cc2c(c(c1O)Cl)C(C)(C)CCC2(C)C)Nc1cc(F)c(c(c1)F)C(=O)O	AGN 195183	2.11476
O/N=C/c1cc[n+](cc1)COC[n+]1ccc(cc1)/C=N/O	Obidoxime chloride	2.11455
CN1CCN(CC1)C1=Nc2ccccc2Oc2c1cc(Cl)cc2	Loxapine succinate	2.1112
Oc1ccc(cc1)[As](=O)(O)O	POLYBENZARSOL	2.11112
OCCOc1ccc(cc1)C1CCCCC1		2.11033
CN(CCN(c1ccccn1)Cc1ccccc1)C	TRIPELENNAMINE HYDROCHLORIDE	2.1094
O=c1[nH]c(CN2CCCC2=N)c(c(=O)[nH]1)Cl	Tipiracil hydrochloride	2.10938
NC(=N)c1ccc(cc1)/C=C/c1ccc(cc1)C(=N)N	STILBAMIDINE	2.10668
N#CC(=C1NCCN1CCNCc1ccc(o1)CN1CCCCC1)C#N	KW-5092	2.10497
[O-]S(=O)(=O)c1c2ccc(cc2ccc1C(C)(C)C)C(C)(C)C	SODIUM DIBUNATE	2.09841
CCNC(=O)N1CCN(CC1)CCCC(c1ccc(cc1)F)c1ccc(cc1)F	Amperozide	2.09832
OC(=O)Cc1ccc(cc1)c1ccccc1	felbinac	2.09324
COc1cc(NC(=O)CCN2CCC(CC2)OC(=O)Nc2ccccc2c2ccccc2)c(cc1CNC[C@@H](c1ccc(c2c1ccc(=O)[nH]2)O)O)Cl	Batefenterol	2.08762
CC(=O)NCC1CN(C(=O)O1)c1ccc(c(c1)F)OCC1(O)CCN(CC1)c1nc2n(cc(c(=O)c2cc1F)C(=O)O)C1CC1		2.0865
COc1ccc2c3c1OC1(C43CCN(C(C2)C4C=CC1O)C)C	Codeine, derivative of	2.08613
O=C(Nc1ccc(cc1)S(=O)(=O)c1ccc(cc1)NC(=O)CCC(=O)O)CCC(=O)O		2.08528
CCN(CCNC(=O)c1c(C)nc(c1C)/C=C\1/C(=O)Nc2c1cc(cc2)c1csc(n1)c1ccccc1)CC	BBI-503	2.08492
O=C(c1ccccc1)c1ccc(cc1)NC(=O)[C@](C(F)(F)F)(O)C	ZD-6169	2.0847
CCOc1ccc(cc1OCC)Cc1nccc2c1cc(OCC)c(c2)OCC	Ethaverine	2.07903
Clc1ccc2c(c1)nn(n2)c1cc(C)cc(c1O)C(C)(C)C	BUMETRIZOLE	2.0788
CNC(=O)c1n(CC)cnc1C(=O)NC	Ethimizol	2.0781
CCS(=O)(=O)c1ccc2c(c1)nc([nH]2)Oc1ccc(nc1)c1ccccc1	S-237648	2.07802
NC(=O)CN1CC(CC1=O)c1ccccc1	Fonturacetam	2.07772
CCOc1noc2c1ccc(c2)OCCC1CCN(CC1)c1ccc(nn1)C	Vapendavir	2.07742
Oc1ccc(cc1)C1COc2c(C1c1ccc(cc1)O)ccc(c2C)O	ME-344	2.07029
CN1CCN(CC1)c1ccc2c(c1)[nH]c(n2)c1c(=O)[nH]c2c(c1N)c(F)ccc2	dovitinib lactate	2.06797
OC(=O)C[C@@H]1NC(=O)CNC(=O)[C@H](CCCCNC(=N)N)NC(=O)CCSSC[C@H](NC(=O)[C@H]2N(C(=O)[C@@H](NC1=O)Cc1c[nH]c3c1cccc3)CCC2)C(=O)N	eptifibatide	2.06585
SCC(=O)[C@@]1(O)CC[C@@H]2[C@]1(C)C[C@H](O)[C@H]1[C@H]2CCC2=CC(=O)CC[C@]12C	Tixocortol	2.06301
CC(Cc1ccc(cc1)C(C(=O)OCCN1CCN(CC1)c1cccc(c1)Cl)C)C	Lobuprofen hydrochloride	2.06289
N#Cc1ccc2c(c1)[C@H](N(c1ccc(cc1)Cl)Cc1ncc[nH]1)[C@H](C(O2)(C)C)O	BMS 191095	2.06239
O=C(O[C@H]1CC[C@]2(C(C1(C)C)CC[C@@]1([C@@H]2C(=O)C=C2[C@@]1(C)CC[C@@]1([C@H]2CC(C)(CC1)C(=O)O)C)C)C)CCC(=O)O	carbenoxolone, York	2.06068
NCCCC[C@@H](C(=O)N[C@H](C(=O)N[C@H](C(=O)N[C@H](C(=O)O)Cc1ccc(cc1)O)C(C)C)CC(=O)O)NC(=O)[C@H](CCCNC(=N)N)N	thymopentin	2.05841
N1CC2C(C1)(C2)c1ccc2c(c1)cccc2	EB-1020	2.05287
O=C(N[C@@H](Cc1ccccc1)CC[C@H](Cc1ccccc1)NC(=O)[C@@H](NC(=O)N(Cc1csc(n1)C(C)C)C)CCN1CCOCC1)OCc1cncs1	Cobicistat	2.05063
CO/N=C/C1=CCCN(C1)C	Milameline hydrochloride	2.0496
OC(=O)CCC/C=C\C[C@H]1C[C@H]2C[C@@H]([C@@H]1NC(=O)c1csc3c1cc(O)cc3)C2(C)C	S 5751	2.04822
CSc1ccc(cc1C)Oc1ccc(cc1CN(C)C)S(=O)(=O)N	UK-416244	2.044
Oc1cc(O)c2c(c1)oc(cc2=O)c1ccc(c(c1)O)O	Digitoflavone	2.04016
Fc1cccc(c1)c1nn(c(=S)n1C)C	Suritozole	2.03728
CCCCCCCCCCCCCCCCCCOCCO	STEARETH-2	2.03581
CNCC(c1cccc(c1)C(F)(F)F)OCC		2.03335
CC(NC(=O)c1ccc(cc1)F)CN1CCN(CC1)c1cccc2c1CCCN2	SLV-307	2.03043
CN(C(=O)c1sc2n(c1C)c1c(n2)ccc(c1)N)C1CCCCC1	YM-298198	2.02952
NCCCCCCCCCCCNC(=N)NC(=O)c1nc(Cl)c(nc1N)N	PSA-23682	2.02871
CC(n1c(=O)c(C(=O)NCCCN2CCCCC2)c(c2c1scc2)O)C	VRX-03011 VRX-03011	2.02825
CCOCCn1c(nc2c1cccc2)C1CCN(CC1)CCc1ccc(cc1)C(C)(C)C	ALINASTINE	2.0261
OC[C@H]1O[C@@H](Oc2cc(/C=C/c3ccc(cc3)O)cc(c2)O)[C@@H]([C@H]([C@@H]1O)O)O	Polydatin	2.02244
CC(OC(=O)C(=C1SCS1)C(=O)Nc1scc(n1)C)C	mivotilate	2.01916
N#C/C=C/1\c2ccc(cc2C(=Cc2c1cccc2)N1CCN(CC1)C)Cl		2.01896
COc1nc2ccc(cc2nc1NC(=O)N1CCN(CC1)c1cc(OC)cc(c1)OC)F	RX-5902	2.01822
CCN1CCN(C(=O)C1=O)C(=O)N[C@@H](C(=O)N[C@@H]1C(=O)N2[C@@H]1SC([C@@H]2C(=O)[O-])(C)C)c1ccccc1	Piperacillin sodium	2.01806
NNC(=O)c1ccncc1	ISONIAZID	2.01698
COC1=CC(=O)C[C@H]([C@@]21Oc1c(C2=O)c(OC)cc(c1Cl)OC)C	griseofulvin	2.01389
O=C(C(c1ccccc1)(C1CCCC1)O)OC1CC[N+](C1)(C)C	glycopyrrolate, Chiesi	2.01115
OC1C(O)C(OC1n1cnc2c1ncnc2N)COP(=O)(O)O	vidarabine sodium phosphate	2.00729
Cc1nc2c(n1)cc(cc2)C(=O)c1ccccc1		2.00716
Clc1ccc(cc1)C1OCc2c1cnc(c2O)C	cicletanine hydrochloride	2.00709
CCC(N1CC(CC1=O)C=C(F)F)C(=O)N	SELETRACETAM	2.00527
OC(COc1c(Cl)ccc(c1C(=C)n1cncc1)Cl)CNC(C)C	711389-S	2.00513
Fc1ccc(c(c1)F)n1cc(C(=O)O)c(=O)c2c1cc(c(c2)F)N1CC(C1C)N	E 4904	2.00422
COCCCOc1ccnc(c1C)CSc1nc2c([nH]1)cccc2	Rabeprazole-thioether	2.00407
O[C@H]1[C@@H](N)CC(O[C@H]1C)O[C@H]1C[C@@](O)(Cc2c1c(O)c1c(c2O)C(=O)c2c(C1=O)cccc2)C(=O)C	idarubicin	1.99925
O[C@H]1C[C@H](O)C(=C)/C(=C\C=C\2/CCC[C@]3([C@H]2CC[C@@H]3[C@@H](CCCC(O)(C)C)C)C)/C1	CD-2027	1.99788
N#C/N=C(/NCCSCc1nc[nH]c1C)\NC	cimetidine	1.99737
O=C(N[C@@H]1C(=O)N2[C@@H]1SCC(=C2C(=O)[O-])C[n+]1ccccc1)Cc1cccs1	Cefaloridine	1.99719
OP(=O)(C(c1cccc2c1cccc2)C(=O)c1cc2ccccc2cc1C(=O)N(C1CCN(CC1)C(=O)c1ccc2c(c1)cccc2)C)O	JNJ-10311795	1.99627
C#C[C@]1(O)CC[C@@H]2[C@]1(C)CC[C@H]1[C@H]2CC[C@@H]2[C@]1(C)Cc1cn3c(nc1C2)nc1c3cccc1	WIN 51708	1.99533
COc1cc2c(cc1N1CCC(CC1)N1CCCC1)ncc(c2Nc1ccc(c(c1)Cl)Sc1nccn1C)C#N	balamapimod	1.99499
OC[C@H]1O[C@@H](Oc2ccccc2C=O)[C@@H]([C@H]([C@@H]1O)O)O		1.99366
Nc1nc2c(s1)cc(cc2)OC(F)(F)F	riluzole	1.98988
CCN(C(CN1c2ccccc2Sc2c1cccc2)C)CC	ETHOPROPAZINE HYDROCHLORIDE	1.98969
COc1ccc(cc1OC)CCNCCC(=O)N1CCCSc2c1cccc2	KT 362	1.98899
[O-][N+](=O)OCCCCOC(=O)C(c1cccc(c1)C(=O)c1ccccc1)C	HCT 2035	1.98559
O=C(Cc1ccc(cn1)c1ccc(cc1)OCCN1CCOCC1)NCc1ccccc1	KX2-391	1.98458
Cc1ccc(cc1)C(=O)c1cccn1C/C=C/c1ccc(cc1)COC(C(=O)O)(C)C	DSP-8658	1.98324
Clc1cc(OCc2ccccc2)ccc1OCc1ccccc1		1.98288
CCOC(=O)CN(Cc1ccccc1O)CCN(Cc1ccccc1O)CC(=O)OCC		1.98274
CCCCCCc1[nH]c2c(n1)n1[C@H]3CCC[C@H]3N=c1n(c2=O)C	SCH 59498	1.98185
O=C(Nc1c[nH]nc1c1nc2c([nH]1)ccc(c2)CN1CCOCC1)NC1CC1	AT-9283	1.98163
CC[C@@H]([C@@H](C(=O)N1CCC[C@H]1C(=O)N1CCC[C@H]1C(=O)O)N)C	IPP	1.98039
COC(COc1c(C)csc1C(=O)CCc1ccccc1)CNCC(C)C	PH-CBR-2016-001-HVAC-10804-0	1.97966
NCCCNc1ccc2c3c1c(=O)c1c(c3nn2CCNCCO)c(O)ccc1O	Piroxantrone	1.97917
O=C1O[C@H](CN1c1ccc(cc1)N1CCOCC1=O)CNC(=O)c1ccc(s1)Cl	rivaroxaban (extended release)	1.97831
C/C(=N/CC/N=C(/C=C(/O)\C)\C)/C=C(\O)/C	ligand of CTC-96	1.97702
CCCCN(CCCC)CCCC(c1ccc(cc1)NS(=O)(=O)C)O	ARTILIDE	1.97596
CCN(CCCN1C(=O)C(C)(C)c2c(C1=O)c1[nH]c(nc1cc2)c1ccccc1)CC	PH-CBR-2016-001-HVAC-07473-0	1.97445
C/C=C\1/NC(=O)C(NC(=O)c2csc(n2)C23CCC(=NC3c3csc(n3)C(NC(=O)c3nc(C(NC(=O)C4N=C1SC4)C(C(O)C)(O)C)sc3)C(C)OC(=O)c1cc(C(O)C)c3c(n1)C(O)C(C=C3)NC(C(=O)NC(C(=O)NC(=C)C(=O)NC(C(=O)N2)C)C)C(CC)C)c1scc(n1)C(=O)NC(=C)C(=O)NC(=C)C(=O)N)C(O)C	THIOSTREPTON	1.97048
COC[C@H](C(=O)NCc1ccccc1)NC(=O)C	lacosamide	1.97015
OC[C@@H]1OC(=O)N(C1)c1ccc(c(c1)F)c1ccc(nc1)c1nnn(n1)C	Tedizolid	1.96856
CCC(n1c(O)nc2c1nc(C#C)cn2)CC	tirasemtiv	1.96854
CCC[C@@H](C(=O)NC1CCN(C1)c1c(F)cc2c3c1oc1ccccc1n3cc(c2=O)C(=O)O)N	A-84441	1.96618
NCCNCCNCCN	Trientine hydrochloride	1.96579
N/C(=N\c1onc(c1)[C@@H](c1ccc(c(c1)F)c1ccccc1)C)/N1CCOCC1	(R,E)-N'-(3-(1-(2-fluorobiphenyl-4-yl)ethyl)isoxazol-5-yl)morpholine-4-carboximidamide hydrochloride	1.96532
CNCC(c1cccc(c1)C(F)(F)F)OC	FLUDOREX	1.9646
Clc1cc(ccc1C)NC(=O)c1nc[nH]c1C	V-144	1.96242
CC(N(C(C)C)CCC(c1ccccc1Cl)(C(=O)N)CCN1CCCCC1)C	disobutamide	1.96224
COc1ccccc1[C@H](Cn1c(=O)n(c(=O)c2c1sc(c2C)c1ncco1)C(C(=O)O)(C)C)OC1CCOCC1	ND-630	1.96186
[N-]=[N+]=NC1CC(OC1COP(=O)(OCC1CCC(O1)n1cnc2c1nc[nH]c2=O)O)n1cc(C)c(=O)[nH]c1=O	IVX-E-59	1.96052
CC(=O)C1c2cccc(c2C(=O)c2c1cccc2O)O		1.95677
O=C([C@@H]1CC[C@@H]2CN1C(=O)N2OS(=O)(=O)O)NC1CCNCC1	Relebactam	1.95613
N#Cc1cccc(c1c1cc(ccc1F)c1cnc2n1ccc(n2)C(O)(C)C)F	GABAalpha2/alpha3 agonists	1.95549
O=C(CC(C)(C)C)OCC(=O)[C@@]12OC(O[C@@H]1C[C@@H]1[C@]2(C)C[C@H](O)[C@]2([C@H]1CCC1=CC(=O)C=C[C@]21C)F)(C)C	TRIAMCINOLONE HEXACETONIDE	1.95293
Nc1cc2CCN3c2c(c1)C(=N[C@H](C3=O)NC(=O)c1cccnc1)c1ccccc1	PD-168787	1.95156
CSC(=O)[C@@]1(O)[C@@H](C)C[C@@H]2[C@]1(C)C[C@H](O)[C@]1([C@H]2CCC2=CC(=O)C=C[C@]12C)F	timobesone	1.95129
Oc1ccc2c(c1)CC[C@@H]1[C@@H]2CC[C@]2([C@H]1CCC2=O)C	ESTRONE	1.95056
CCOC(=O)C1=C[C@H]([C@@H]([C@H](C1)N)NC(=O)C)OC(CC)CC	oseltamivir phosphate (tablet)	1.94946
CC[n+]1c(/C=C/c2ccc(cc2)N2CCCC2)cccc1/C=C/c1ccc(cc1)N1CCCC1	STILBAZIUM IODIDE	1.94904
COc1cc(CNCCC2CCOCC2)ccc1Oc1cnc(cn1)C(=O)N	bevenopran	1.9455
Fc1ccc(c(c1)F)[C@]([C@H](n1cnc2c(c1=O)ccc(c2)Cl)C)(Cn1ncnc1)O	albaconazole	1.94528
CCN(CCNC(=O)c1c(C)[nH]c(c1C)/C=C/1\C(=O)Nc2c1cc(F)cc2)CC	Sunitinib malate	1.94527
Clc1ccc2c(c1)nccc2Nc1ccc(c(c1)O)CNC(C)(C)C	N-tert-Butylisoquine	1.94403
O=C1CC[C@]2(C(=C1)C(=C[C@@H]1[C@@H]2CC[C@]2([C@H]1CC[C@]2(C)C(=O)C)C)C)C	MEDROGESTONE	1.94321
O=C1CCc2c(N1)ccc(c2)OCCCCc1nnnn1C1CCCCC1	cilostazol SR	1.94079
O=C1/C(=C\2/C(=O)Nc3c2cccc3)/Nc2c1cccc2	indirubin	1.93989
Fc1ccc(cc1)C(c1ccc(cc1)F)CCCN1CCC(CC1)(O)c1ccc(c(c1)C(F)(F)F)Cl	penfluridol	1.93929
C[C@@H]1NCCN(C1)c1c(F)cc2c(c1OC(F)F)n(cc(c2=O)C(=O)O)C1CC1	CADROFLOXACIN	1.93884
CCN1C(=O)c2cc(ccc2Oc2c1cccc2)NC(=O)c1ccc(cc1)C(F)(F)F		1.9388
O[C@@H]1[C@H](O[C@@H]([C@H]([C@@H]1O)O)CCP(=O)(O)O)Oc1ccc(cc1C)C	PXS-64	1.93875
CCc1ccc2c(c1)N(CC(CN(C)C)C)c1c(S2)cccc1	Ethylisobutrazine Hydrochloride	1.93812
CC(=O)OCC(CCn1cnc2c1nc(N)nc2)COC(=O)OC(C)C	SK-1899	1.93803
CC[C@H](N(CCN([C@H](COC(=O)c1cc(OC)c(c(c1)OC)OC)CC)C)C)COC(=O)c1cc(OC)c(c(c1)OC)OC	BUTOBENDINE HYDROCHLORIDE	1.93419
O=C1CC[C@]2(C(=C1)CCC1C2[C@@H](O)C[C@]2(C1CC[C@]2(O)C(=O)CSC(=O)C(C)(C)C)C)C	TIXOCORTOL PIVALATE	1.93232
C1CN=C(N1)Cc1cccc2c1cccc2	OcuNex	1.9307
Clc1ccc(cc1)C1C(=O)c2c(C1=O)c(ccc2)c1ccccc1	Org-7258	1.92966
Fc1ccc(c(c1)F)[C@]1(CO[C@@H](O1)COc1ccc(cc1)N1CCN(CC1)c1ccc(cc1)N1CCN(C1=O)C(C)C)Cn1cncn1	R-126638	1.92656
CN(CCON=C1c2ccccc2CCc2c1cccc2)C	NOXIPTILINE	1.92593
O=C1SCC(=NN1)c1ccc2c(c1)CCC(=O)N2	Y-20487	1.92553
CN(CC(CN1c2ccccc2CCc2c1cccc2)C)C	Trimipramine maleate	1.92101
COc1cc(CCc2[nH]nc(c2)NC(=O)c2ccc(cc2)N2C[C@H](C)N[C@@H](C2)C)cc(c1)OC	AZD-4547	1.91778
CC(Oc1ccc2c(c1)occ(c2=O)c1ccccc1)C	ipriflavone	1.907
CCc1ccccc1NC(=O)c1ccc[nH]c1=O		1.90658
C#CCOc1ccc2c(c1)c(nc(=O)n2Cc1ccc(cc1)Br)c1ccc(cc1)C(C)C	AXT-914	1.90637
COC[C@@H](COc1ccc(cc1)OCc1cccc(c1)Cl)O	MD 280040	1.90573
Clc1ccc2c(c1)nc(cc2)/C=C/c1cccc(c1)[C@H](CCc1ccccc1C(O)(C)C)SCC1(CC1)C(=O)O		1.9055
OC(=O)C[C@H](c1cccc2c1cccc2)CC(=O)Nc1c(C)cc(cc1C(=O)N1CCC2(CC1)CCCC2)C	itriglumide	1.90528
COc1ccc2c(c1)c1CCN=C3c1n2CCN3C	METRALINDOLE	1.90423
CC(C[C@@H]1NC(=O)[C@H](NC(=O)[C@H](CC(=O)O)NC(=O)[C@@H](NC(=O)[C@H](NC(=O)[C@H](NC1=O)Cc1cnc2c1cccc2)CC(=O)O)CC(=O)N1CCN(CC1)c1ccccc1)c1cccs1)C	TAK 044	1.90364
CN1CCN(CC1)c1ccc(cc1C)Nc1ncc(c(n1)N[C@@H]1[C@H]2C=C[C@@H]([C@@H]1C(=O)N)C2)F	R-763	1.9029
Fc1ccc(c(c1)F)COC[C@H](C(=O)N1CCC2=NN(C(=O)[C@@]2(C1)Cc1ccccn1)CC(F)(F)F)NC(=O)C(N)(C)C	CP-464709	1.90284
Brc1ccc(cc1)c1c(Cn2ncnc2)c(nn1c1ccccc1Cl)c1nnc(s1)C(C)(C)C	GCC-2680	1.90281
OCC(=O)[C@@]1(O)CC[C@@H]2[C@]1(C)C[C@H](O)[C@H]1[C@H]2CCC2=CC(=O)CC[C@]12C	HYDROCORTISONE SODIUM PHOSPHATE	1.90274
CN1C[C@H]2C[C@@H]1CN2c1cc2c(cc1F)c(=O)c(cn2C1CC1)C(=O)O	Danofloxacin mesylate	1.8992
COc1ccc(cc1OC)CCN(CCCC(c1ccc(c(c1)OC)OC)(C(C)C)C#N)C	verapamil CDT	1.89488
O=C(CNC(=O)C(Cc1ccccc1)CSC(=O)C)OCc1ccccc1	dexecadotril	1.89442
NCc1ccccc1Sc1ccccc1CO	bipenamol	1.89374
COc1cccc(c1N)c1cc(=O)c2c(o1)cccc2	PD-098059	1.89352
COC[C@@H](Oc1cc(Oc2ncc(nc2)C(=O)N2CCC2)cc(c1)C(=O)Nc1noc(c1)C)C		1.89251
SCC(=O)Nc1ccccc1	AUROTHIOGLYCANIDE	1.88926
SC[C@@H](C(=O)O)NC(=O)C(S)(C)C	bucillamine	1.88717
C#CCN[C@@H]1CCc2c1cccc2	Rasagiline mesilate	1.88578
BrC(C(=O)NC(=O)N)C(C)C	BROMISOVAL	1.88554
Clc1ccc(c(c1)Cl)C(=O)NS(=O)(=O)c1ccc(s1)Br	Tasisulam sodium	1.88533
Sc1ncc(c(n1)O)I	IODOTHIOURACIL	1.8844
Oc1cccc(c1)SCc1ccccc1N(C)C	analog of MOXYFETIN	1.88274
O[C@@H]1[C@H](O)[C@H](O[C@H]1n1cnc(c1N)C(=O)NCc1ccc(cc1)[N+](=O)[O-])COP(=O)(O)O	GP-668	1.88106
[O-]C(=O)[O-]	lithium carbonate	1.87973
OC1CS(=O)(=O)CC1NC(=O)c1c(C)nc(c1C)/C=C/1\C(=O)Nc2c1cc(F)cc2	CM-082	1.87966
CCCc1nc(ccc1/C=C/C(=O)N[C@@H](c1cc(F)c(c(c1)F)NS(=O)(=O)C)C)C(F)(F)F	PAC-14028	1.87799
C[C@@H](N(CC#C)C)Cc1ccc(cc1)F	parafluoro-selegiline	1.87787
CCCCC1=Cc2c(C1N1CCN(CC1)C)cc1c(c2)OCO1	TN-871	1.87694
O=C(C(CNC(=O)c1ccccc1)C)OCC(=O)C12OC(O[C@@H]1C[C@@H]1C2(C)C[C@H](O)[C@]2([C@H]1CCC1=CC(=O)C=CC21C)F)c1ccc(cc1)N(C)C	TBI-PAB	1.87426
Cc1ccc(cc1)S(=O)(=O)NC(=O)Nc1ccc(cc1)Cl	LY 181984	1.87397
OC(=O)C1=CC(=O)C(O1)(C)c1ccccc1	Acifran	1.87386
CCOC(=O)COc1cc(C)c(cc1C)CCN[C@H]([C@@H](c1ccc(cc1)O)O)C	KUC-7483	1.8737
OCC1OC(=O)N(C1)c1cccc(c1)C	toloxatone	1.87079
Clc1ccc(c(c1)Cl)Cn1cc(c2c1c(/C=C/C(=O)NS(=O)(=O)c1sc(c(c1)Cl)Cl)cc(c2)F)C	DG-041	1.86971
COC(c1ccccc1)(c1ccccc1)CCN(C)C		1.867
COCC(=O)N(c1ccccc1)C1CCN(CC1)CCc1ccccc1		1.8659
CCOC(=O)C1=C[C@]2(CC)CCCN3[C@@H]2c2n1c1ccccc1c2CC3	vinpocetine	1.8641
COc1cccc(c1)C1(O)CCCC[C@@H]1C[N+](C)(C)[O-]	Tramadol N-oxide	1.86046
[N-]=[N+]=CC(=O)OC[C@@H](C(=O)O)N	AZASERINE	1.86003
O=C(c1cc2c(n1)cccc2)N[C@H]1N=C(c2ccccc2F)c2c3N(C1=O)CCc3ccc2	FK480	1.85867
CN1CCC(=C2c3ccccc3Oc3c2cccn3)CC1	AZANATOR	1.85825
O=C(Nc1ccccc1Br)Nc1ccc(cc1O)[N+](=O)[O-]	SB 225002	1.8565
CC(c1ccc(cc1)S(=O)(=O)NC(=O)NC1CCCCC1)O	HYDROXYHEXAMIDE	1.85614
C=CCN1CCc2c(CC1)nc(s2)N	talipexole	1.85593
CCC1=C[C@H]2CN(C1)CCc1c([C@@](C2)(C(=O)OC)c2cc3c(cc2OC)N([C@@H]2[C@@]43CCN3[C@H]4[C@@](CC)(C=CC3)[C@H]([C@]2(O)C(=O)OC)OC(=O)C)C)[nH]c2c1cccc2	anhydrovinblastine	1.85295
Clc1ccc(cc1)C(=O)c1ccc(cc1)OC(C(=O)NCCS(=O)(=O)O)(C)C	Alfa-1081	1.85268
OC(=O)C(COP(=O)(O)O)N	phosphatidylserine	1.85256
CN[C@H](C(=O)N[C@H](C(=O)N1CCC[C@H]1C(=O)Nc1snnc1c1ccccc1)C1CCCCC1)C	GDC-0152	1.85184
CC(C[C@@H](C(=O)N[C@H](C(=O)N)Cc1ccccc1)NC(=O)[C@@H](C[C@H]([C@@H](NC(=O)OC(C)(C)C)Cc1ccccc1)O)Cc1ccccc1)C	L-685458	1.85068
COc1ccccc1OCC(COC(=O)N)O	Methocarbamol	1.84923
O[C@H]1C[C@@]2(C)[C@@H](C[C@H]1O)C(=O)C=C1[C@@H]2CC[C@]2([C@@]1(O)CC[C@@H]2[C@]([C@@H](CCC(O)(C)C)O)(O)C)C	ECDYSTERONE	1.84868
CN(Cc1ccc(cc1)C1CCCCC1)C		1.84833
CCCCc1nc(C)n(c(=O)c1Cc1ccc(cc1)c1ccccc1c1[nH]nnn1)Cc1ccccc1C(=O)O	LR-B-057	1.84619
COc1ccc(cc1OCCCN1CCC(CC1)C(=O)c1ccc(cc1)F)C1CNC(=O)C1	LIDANSERIN	1.84593
OC(COc1ccccc1C)CNCCOc1ccc(cc1)C(=O)N	tolamolol	1.84544
CCCCCCCCCCCCCCC[C@H]([C@H](NC(=O)C)CO)O		1.84384
COCCOCCNCC1COc2c(O1)cccc2	AMBENOXAN	1.84335
CCCNCC(COc1ccccc1C1CC2CC1CC2)O		1.84325
N#Cc1ccc(cc1)NC(=O)N[C@@H]1CCN([C@H](C1)c1nc2c([nH]1)cccc2)C	glasdegib	1.8408
C[C@H]([C@@H]1[C@H]2CC(=C(N2C1=O)C(=O)O)SCCNC=N)O	imipenem	1.8372
CCCCN(Cc1ccco1)Cc1ccccc1		1.83676
Sc1nc(O)c(c(n1)O)C(=O)Nc1ccccc1	Merbarone	1.83542
CCCOC	METHYL PROPYL ETHER	1.83534
CCCCCCN1CCN(CC1)/C(=N/CC(C)C)/c1ccccc1	BUCAINIDE	1.83409
CC(=O)Nc1ccc(cc1)OCc1cccc(c1)F		1.82658
O=C1CCC2=C3[C@H](C[C@]4([C@H](C3CCC2=C1)CC[C@@]14OCCC1=C)C)c1ccc(cc1)C(=O)C	Org-33628	1.82651
OC(=O)C(CC(=O)c1ccc(cc1)F)Cc1ccccc1	EML-16257	1.82483
O=C(Nc1c(C)cccc1C)CN1CCN(CC1)[C@H]1CCN([C@@H](C1)Cc1ccccc1)C(=O)c1cc(cc(c1)C(F)(F)F)C(F)(F)F	R-116301	1.82386
COc1ccc(cc1C(=O)NCCc1ccc(cc1)S(=O)(=O)NC(=O)NC1CCCCC1)Cl	glyburide	1.82372
CCC(C(n1cncn1)c1ccc(cc1)Nc1nc2c(s1)cccc2)CC	Talarozole	1.82343
COC(=O)CCNC(=O)[C@@H](C(COP(=O)(N[C@H](C(=O)OC)C)Oc1ccccc1)(C)C)O	RE-024	1.82062
N[C@@H]1CCN(C1)c1cc(nc(n1)N)C(C)C	JNJ-39758979	1.81853
N#Cc1ccc2c(c1C(F)(F)F)ccn2[C@@H](CS(=O)(=O)C)C	GSK-2881078	1.81804
c1ccc(cc1)Oc1nncc2c1cccc2	D 21151	1.8178
OC[C@H]([C@@H](c1ccc(cc1)[N](=O)O)O)NC(=O)CN=[N+]=[N-]	Azidamfenicol	1.81754
OC(=O)CCC/C=C\C[C@H]1[C@@H](O)C[C@H]([C@@H]1/C=C/[C@H](COc1cccc(c1)Cl)O)O	_:_2016-03-02: CLOPROSTENOL	1.81655
CO/N=C(/c1csc(n1)N)\C(=O)N[C@@H]1C(=O)N2[C@@H]1S(=O)CC(=C2C(=O)O)COC(=O)C	CEFTIOXIDE	1.81612
O=C(c1ccc(c(c1O)O)O)c1cc(O)c(c(c1)O)O	Exifone	1.81415
CNc1scc(n1)C(c1ccc(c(c1)F)c1ccccc1)C	SM-8849	1.81341
O=C(N1CCN(CC1)C(=O)CCOS(=O)(=O)C)CCOS(=O)(=O)C	ANCYTE	1.81337
CC[C@H]1NC(=O)[C@@H](NC(=O)c2ncccc2O)[C@@H](C)OC(=O)[C@@H](NC(=O)[C@H]2N(C(=O)[C@@H](N(C(=O)[C@H]3N(C1=O)CCC3)C)Cc1ccc(cc1)N(C)C)C[C@@H](CS[C@@H]1C[NH+]3CCC1CC3)C(=O)C2)c1ccccc1	Quinupristin (mesylate)	1.81279
CCCn1c(=O)c(C(=O)NNC(=O)C(C)C)c(c2c1cccc2)O		1.80935
O=C1CC[C@]2(C(=C1)CC[C@@H]1[C@@H]2CC[C@]2([C@H]1CC[C@]2(OC(=O)C)C(=O)C)C)C	17-Acetoxyprogesterone	1.80925
COc1ccc(cc1)c1nc2c(n1C(C)C)ccc1c2cccc1	TOMOXIPROLE	1.80917
CC(COc1ccc(cc1)Cc1cnc(nc1N)N)C		1.80894
Clc1sc2c(c1)S(=O)(=O)N(C(=C2O)C(=O)Nc1ccccn1)C	Lornoxicam (Xefo)	1.80851
CCOc1ccc2c(c1)sc(n2)SC(c1ccccc1)(C(=O)O)C	tazasubrate	1.80792
CCN(CC[n+]1ccc2c(c1)c(C)c1c(c2C)nc2c1cc(O)cc2)CC	DATELLIPTIUM CHLORIDE	1.80725
Nc1c2ccccc2nc2c1cccc2	ACRISORCIN	1.80471
OC[C@H]1O[C@H]([C@@H]([C@@H]1O)O)n1cnc2c1ncnc2NCc1ccccc1		1.80301
CCCCc1ncc(n1Cc1ccc(cc1)C(=O)O)/C=C(/C(=O)O)\Cc1cccs1	eprosartan mesylate	1.80151
OC[C@H]([C@H]1O[Sb](=O)(O[C@H]([C@H]1O)C(=O)O)O[Sb]1(=O)O[C@H]([C@@H](CO)O)[C@@H]([C@@H](O1)C(=O)O)O)O	Sodium stibogluconate	1.80146
O=C(C1CC1)Nc1nccc(c1)Oc1cc(F)c(cc1F)NC(=O)C1(CC1)C(=O)Nc1ccc(cc1)F	Altiratinib	1.80104
OC(=O)CN1CCN(CC1)C(c1cccc(c1)C(F)(F)F)c1ccccc1	Tilapertin	1.80044
CCN(CCNC(c1ccccc1)C(=O)OCCC(C)C)CC	CAMYLOFINE	1.79799
NCCCC[C@H](C(=O)N[C@@H](C(=O)O)Cc1cccc2c1cccc2)NC(=O)[C@H](NC(=O)[C@H](NC(=O)[C@@H](Cc1cccc2c1cccc2)NC(=O)[C@H](NC(=O)[C@H](NC(=O)[C@H](NC(=O)[C@@H](CCCCN)N)CC(C)C)Cc1ccccc1)CCCNC(=N)N)CCC(=O)N)C	XOMA-629	1.79761
Fc1ccc(cc1)N1CCN(CC1)CCCN1CCC(c2c(C1=O)ccn2C)O	SUN C5174	1.79728
CC(C[N+](C)(C)C)OC(=O)C	METHACHOLINE CHLORIDE	1.79579
CN(C(=O)NC(C(C(C(CO)O)O)O)C=O)N=O	streptozocin	1.79509
O=C(N(C1CCCCC1)C)CCCOc1ccc2c(c1)ccc(=O)[nH]2	cilostamide	1.79441
O=C(c1ccc(cc1)N)NCC(=O)O	AMINOHIPPURIC ACID	1.79429
O=C(C(C)(C)C)Oc1ccc2c(c1)O[C@@H](C(=C2C)c1ccc(cc1)OC(=O)C(C)(C)C)c1ccc(cc1)OCCN1CCCCC1	Sch-57050	1.79368
COc1cc2[nH]c(=O)c3c(c(=O)c2cc1OC)n[nH]n3	metabolite of ME-3301	1.7936
COC(=O)[C@@]1(O)C[C@]2(CC)CCCN3[C@@H]2c2n1c1ccccc1c2CC3	VINCAMINE	1.79207
N1CCC(CC1)c1ccccc1		1.79104
O=C(c1sc2=NC(Cn2c1C)(C)C)NCCc1ccccc1	TOK-8801	1.78792
Clc1ccc(cc1)c1cc2ccccc2c2=NCCn12		1.7878
OC(c1ccccc1)(c1ccccc1)C1CCNCC1	AZACYCLONOL	1.78568
COc1cc2OC(C)(C)C=Cc2c2c1c(=O)c1c(n2C)cccc1	acronycine	1.78515
NNc1ccc(nn1)c1ccccc1OCC(CNC(C)(C)C)O	prizidilol	1.78315
OC(=O)[C@@H](CSCCCC/C=C(/C(=O)O)\NC(=O)[C@@H]1CC1(C)C)N	Cilastatin sodium	1.7823
[O-]C(=O)C(C(C(C(C(C(C(F)(F)F)(F)F)(F)F)(F)F)(F)F)(F)F)(F)F	Ammonium pentadecafluorooctanoate	1.7795
CN(C(CN1c2ccccc2Sc2c1cccc2)C)C	AMINOPROMAZINE	1.77883
N#C[C@@]1(CC[C@@H](CC1)N1CC[C@]([C@@H](C1)C)(C(=O)O)c1ccccc1)c1ccc(cc1)F	levocabastine	1.77558
CN(C(=O)CNc1nc(nc(c1Cl)c1ccccc1)c1ccc(cc1)C(F)(F)F)C1CC1	SX 5452	1.77231
CCC(=O)NC[C@@H]1C[C@H]1c1cccc2c1CCO2	Tasimelteon	1.77089
CCc1cc(Nc2scc(n2)c2ccc(c(c2)F)n2cnc(c2)C)c(cc1C)C	NGP-555	1.77045
CNC(=O)c1nccc(c1)Oc1ccc2c(c1)sc(n2)N[C@@H]1CCCC[C@H]1O	BLZ-945	1.76963
OC[C@H](c1ccccc1)C(=O)OC1C[C@@H]2CC[C@H](C1)N2C	Atropine sulfate	1.76479
CN(C(CC(c1ccccn1)(c1ccccc1)C(=O)N)C)C	VAMICAMIDE	1.76275
CN(/C=N/c1ccc(cc1C)C)/C=N/c1ccc(cc1C)C	Amitraz	1.75618
CN[C@@H]1Cc2cccc3c2n(C1)c(O)n3	SUMANIROLE	1.75541
N#Cc1ccc(c(c1)F)[C@H]1CCc2n1cnc2	Osilodrostat	1.75522
Clc1ccc(cc1)[C@@](c1cncn1C)(c1ccc2c(c1)c(cc(=O)n2C)c1cccc(c1)Cl)N	tipifarnib	1.75481
c1([2H])c([2H])c([2H])c(c(c1C([2H])([2H])[2H])[2H])[2H]	Toluene	1.75359
CC(OC(=O)Nc1cccc(c1)Cl)C	Chlorpropham	1.75339
COc1cc(Cc2cnc(nc2N)N)c(cc1OC)C	ORMETOPRIM	1.75285
O=C1OC(CN1/N=C/c1ccc(o1)[N+](=O)[O-])CN1CCOCC1	LEVOFURALTADONE	1.7517
NCC1(CCN(CC1)c1ncnc2c1c(C)c[nH]2)C(=O)Nc1cccc(c1)OC(=O)N(C)C	LX-7101	1.74901
O=C(N[C@H]([C@H](C[C@H](Cc1ccccc1)NC(=O)[C@@H](N1CCCNC1=O)C(C)C)O)Cc1ccccc1)COc1c(C)cccc1C	Lopinavir	1.7485
CC(=O)OCC(=O)[C@@]1(O)[C@H](C)C[C@@H]2[C@]1(C)C[C@H](O)[C@]1([C@H]2C[C@@H](C2=CC(=O)C=C[C@]12C)F)F	Flumethasone Acetate	1.74675
Clc1cccc(c1N(C1=NCCN1)C1CCCCO1)Cl	PICLONIDINE	1.74404
OC(=O)C1NCC(C1)Oc1cccc(c1)Cl	(no name)	1.74262
O=C(c1ccncc1)N/N=C/c1ccccc1O	SALINAZID	1.74096
CN(CCCNc1ncc(c2c1c1c([nH]2)ccc2c1ccc(c2)O)C)C	INTOPLICINE	1.74034
COCc1c(ncc2c1c1c(cccc1n2)OC(C)C)C(=O)OCC	ZK 95962	1.73915
COc1cc(C[N+]2(CCOCCC3CCC4CC3C4(C)C)CCOCC2)c(cc1OC)Br	pinaverium bromide	1.73863
Fc1cccc(c1c1nnc2n1nc(OCc1ncnn1C)c(c2)C1CCC1)F	MRK-409	1.73509
Cc1cccc(c1)N(C(=S)Oc1ccc2c(c1)C1CCC2C1)C	tolciclate	1.73056
COC(=O)c1cnc2n1CCc1c(C2=C2CCN(CC2)CCc2ccc(cc2)OCc2ccc3c(n2)cccc3)cccc1	[11C]Laniquidar	1.73024
OC(=O)C[C@@H](C(=O)N([C@H](C(=O)N)Cc1ccccc1)C)NC(=O)[C@@H](NC(=O)[C@H](Cc1c[nH]c2c1cccc2)NC(=O)OC(C)(C)C)CCCCNC(=O)Nc1ccccc1C	A-71623	1.73019
CN(CCCCCCCCSc1nc(ccc1C(=O)c1cccs1)C(C)C)C	Y 29794	1.72912
CO[C@H]1/C=C\O[C@@]2(C)Oc3c(C2=O)c2C4=NC5(NC4=C(C(=O)c2c(c3C)O)NC(=O)/C(=C\C=C/[C@@H]([C@@H]([C@H](C([C@H]([C@@H]([C@@H]1C)O)C)O)C)O)C)/C)CCN(CC5)C(CC)C	LM 565	1.72881
OC[C@@H]1N(C)CC[C@H]1c1c(O)cc(c2c1oc(cc2=O)c1ccc(cc1Cl)C(F)(F)F)O	Voruciclib hydrochloride	1.72876
COC(=O)c1ccccc1NC(=O)CN(C)C		1.7282
CO/N=C/1\CCCC(=C1)C#Cc1cccc(n1)C	ABP 688	1.72686
COc1nccc(c1)NC(=O)C(=O)c1c2cc(C)ccc2n(c1C)Cc1ccc(cc1)Cl	MM-433593	1.72523
Cc1ccc2c(n1)c(OC(=O)c1ccc3c(c1)cccc3)c(cc2Br)Br		1.72514
OCCNC(=O)[C@H](Cc1c[nH]c2c1cccc2)NC(=O)[C@H](NC(=O)[C@H](Cc1c[nH]c2c1cccc2)NC(=O)[C@H](NC(=O)[C@H](Cc1c[nH]c2c1cccc2)NC(=O)[C@H](NC(=O)[C@H](Cc1c[nH]c2c1cccc2)NC(=O)[C@@H](C(C)C)NC(=O)[C@H](C(C)C)NC(=O)[C@@H](C(C)C)NC(=O)[C@@H](NC(=O)[C@H](NC(=O)[C@@H](NC(=O)CNC(=O)[C@H](C(C)C)NC=O)C)CC(C)C)C)CC(C)C)CC(C)C)CC(C)C	GRAMICIDIN	1.7241
O=C1CC[C@@H]2[C@]1(C)CC[C@H]1[C@H]2CCc2c1ccc(c2)OS(=O)(=O)N	CT-2251	1.72237
O=C([C@H](NC(=O)C(N)(C)C)CCCc1ccccc1)N1CCC2(CC1)CN(c1c2cccc1)S(=O)(=O)C	L 163255	1.71978
Clc1ccc(cc1)COC(c1ccc(cc1Cl)Cl)Cn1cncc1	ECONAZOLE NITRATE	1.71943
OC(=O)CCC/C=C\[C@H]1C2CCC([C@@H]1CNS(=O)(=O)c1ccc(cc1C)Cl)CC2	ONO-8711	1.71898
CN/C(=N/C)/NCc1ccccc1	bethanidine	1.712
CNCC(CC12CCC(c3c1cccc3)c1c2cccc1)O	LEVOPROTILINE	1.70342
Fc1cnc(c(n1)C(=O)N)O	Favipiravir	1.70219
COc1ccc(cc1)c1n/c(=N/c2ccccc2)/sn1c1ccccc1		1.70216
CCCC[C@@H](C(=O)N[C@H]1CC(=O)NCCCC[C@H](NC(=O)[C@@H](NC(=O)[C@@H](NC(=O)[C@H](NC(=O)[C@@H](NC1=O)Cc1nc[nH]c1)Cc1ccccc1)CCCNC(=N)N)Cc1c[nH]c2c1cccc2)C(=O)O)NC(=O)C	Bremelanotide	1.6991
CNC(CC1CCCC1)C	CYCLOPENTAMINE	1.69809
OC(=O)CC[C@@H](C(=O)Nc1ccccc1)NC(=O)[C@H](Cc1ccccc1)CSC1OC(=O)c2c1cccc2	ONO-9902	1.69705
CCN(C(=O)CSc1ccc(nn1)Cl)CC	AZINTAMIDE	1.69584
NC[C@@H](NC(=O)c1sc(c(c1)c1c(Cl)cnn1C)Cl)Cc1cccc(c1)F	Afuresertib	1.6943
[Hg+]c1ccccc1	PHENYLMERCURIC BORATE	1.69255
OCC(C(c1ccc(cc1)[N+](=O)[O-])O)NC(=O)C		1.69198
OC(=O)CCCc1cc(O)c(c(c1C)C)O		1.69156
O=C1CN2C(N1)CCC2=O	Dimiracetam	1.69114
Oc1ccc2c(c1)CN[C@H](C2)C(=O)N[C@@H](C(C)C)CN1CC[C@@]([C@H](C1)C)(C)c1cccc(c1)O	JDTic dihydrochloride	1.69015
CNCCON=c1c2ccccc2ccc2c1cccc2	demexiptiline	1.69015
N#Cc1c(N)[nH]c2c1cc(cc2)Sc1ccccc1	amphethinile	1.68993
CCNCC1CCN(C1)c1c(F)cc2c(c1F)n(CC)cc(c2=O)C(=O)O	CI-934	1.68932
NC(=O)CC[C@@H](C(=O)O)NC(=O)[C@@H](N)C	Glutamine dipeptide	1.68926
CCC(OC(=O)c1ccccc1)(CN(C)C)C	AMYLOCAINE	1.68661
O=C(C(c1ccsc1)C1CCCCC1)OCCN1CCCCCC1	cetiedil	1.68337
OC(=O)COc1nn(c2c1cccc2)Cc1ccccc1	bendazac lysinate	1.68324
O=C(C(c1ccccc1)C1CCCCC1)OCC[S+](C)C	HEXASONIUM IODIDE	1.68198
CCNc1ncnc2c1nc(n2Cc1ccc(c(c1)OC1CCCC1)OC)C(C)C		1.6819
Clc1ccc(cc1)C1(O)CCN(CC1)CCC(C(=O)N(C)C)(c1ccccc1)c1ccccc1	loperamide oxide	1.67938
COc1ccc2c(c1)c(CCNC(=O)c1occc(=O)c1)c[nH]2	Piromelatine	1.67825
OC[C@H](c1cnc(c(c1)Cl)C1=CCN(CC1)C(=O)Nc1ccc(cn1)C(F)(F)F)O	V-116517	1.67758
CC(COC(=O)OCN1C(=O)CN(CC1=O)CCN1CC(=O)N(C(=O)C1)COC(=O)OCC(C)C)C	Sobuzoxane	1.67651
COc1ccc2c(c1)c(CCNC(=O)c1occ(c(=O)c1)OC)c[nH]2		1.67646
O=c1ccc2c(o1)cc1c(c2OCCCCOc2ccccc2)cco1	PAP-1	1.67383
OC(=O)C(Cc1ccccc1)NCc1ccc(cc1)Cl	BRL-26314	1.67335
CN(CCn1c(=O)n2c3c(c1=O)cccc3c1c2ccc2c1CCCC2=O)C	ER 37328	1.67331
CCCOC(c1ccccc1)(c1ccccc1)C(=O)OC1CCN(CC1)C	propiverine hydrochloride ER	1.67231
O=C(C(c1ccccc1)(c1ccccc1)O)OCC1CCC[N+]1(C)C	Poldine Methylsulfate	1.67107
CN[C@H]([C@H](c1ccc(c(c1)O)O)O)C(=O)OC	AZ-002	1.66981
Nc1cc(N)c(c(c1)C(=O)O)N=Nc1ccc(cc1)S(=O)(=O)N	SULFACHRYSOIDINE	1.66925
CN(CCOC(c1ccccn1)c1ccc(cc1)Cl)C	carbinoxamine, Elan	1.66887
BrCC(C(F)F)(F)F	HALOPROPANE	1.66733
O=C(C(c1cc(cc(c1)C(F)(F)F)C(F)(F)F)(C)C)N(c1cnc(nc1c1ccccc1C)N1CCCCC1)C		1.66654
CCO[C@@H]1OC(=O)C[C@@H]1NC(=O)[C@@H]1CCCN2N1C(=O)[C@H](CCC2=O)NC(=O)c1nccc2c1cccc2	pralnacasan	1.66529
N#Cc1ccc(cc1)C1CCCc2n1cnc2	fadrozole	1.66493
CNS(=O)(=O)CC1CCC(CC1)N(c1ncnc2c1cc[nH]2)C	Oclacitinib	1.66479
O=C(O[C@H]1CC[C@]2([C@H](C1(C)C)CC[C@@]1(C2=CC[C@H]2[C@@]1(C)CC[C@@]1([C@H]2C[C@](C)(CC1)C(=O)O)C)C)C)CCC(=O)O	DELOXOLONE SODIUM	1.66436
O[C@@H]1CC[C@H](C1)C(=O)N[C@@H](C(=O)N1CC[C@](C(C1)(C)C)(O)c1ccc(cc1)Cl)C(C)C	BMS-457	1.66292
OCC(=O)[C@@]1(O)[C@@H](C)C[C@@H]2[C@]1(C)C[C@H](O)[C@]1([C@H]2CCC2=CC(=O)C=C[C@]12C)F	DE-102	1.66202
C=CCN1CCN(CC1)C(c1ccccc1)c1ccccc1	Aligeron	1.66081
O[C@H]1CC[C@]2([C@H](C1)CCC1C2CC[C@]2([C@H]1C[C@H](C2=O)Br)C)C	IMMUNITIN	1.6592
O[C@@H]1CC[C@@]2([C@@]34[C@H]1Oc1c4c(C[C@H]2N(CC3)CC2CC2)ccc1O)O	6beta-naltrexol	1.65767
OCC[C@@H](c1ccc(cc1)Cl)NC(=O)C1(N)CCN(CC1)c1ncnc2c1cc[nH]2	AZD-5363	1.65699
Cn1c(CCN2CCNCC2)nc2c1c(=O)n(c(=O)n2C)C		1.65687
CN1C=CCC(=C1)C(=O)O[C@@H]1CC[C@@H]2[C@@]1(C)CC[C@H]1[C@H]2CCc2c1ccc(c2)O	IDR-90104	1.65673
C=C[C@@H]1C[C@]1(NC(=O)[C@@H]1C[C@@H]2CN1C(=O)[C@@H](NC(=O)O[C@@H]1C[C@H]1CCCCCc1c(O2)nc2cc(OC)ccc2n1)C(C)(C)C)C(=O)NS(=O)(=O)C1CC1	MK-5172	1.65663
CCCCCCCC(=O)c1ccc(c(c1)C(=O)O)O	beta-Lipohydroxy acid	1.65411
COC1(C)CC(c2ccccc2)c2c(O1)c1ccccc1oc2=O	CYCLOCUMAROL	1.65384
N[C@H]1CC[C@@H](c2c1cccc2)c1ccc(c(c1)Cl)Cl	Dasotraline	1.65383
OCC1Oc2c(C1)cc(cc2)OC		1.64851
CCOC(=O)c1cnc([nH]c1=O)Nc1ccc(cc1)OC		1.64784
c1ccc(cc1)CCNc1scc(n1)c1ccccc1	fanetizole	1.64684
OC(=O)c1cccc2c1Nc1cc(ccc1S2)C(F)(F)F	FLUTIAZIN	1.64555
CC(=O)OCC1=C(C(=O)O)N2[C@H](SC1)[C@@H](C2=O)NC(=O)Cc1cccs1	Cefalotin sodium	1.64445
CCn1ccnc1CC1COc2c(O1)cccc2	Imiloxan	1.64442
CCCC(=O)C1c2cccc(c2C(=O)c2c1cccc2O)O	BUTANTRONE	1.64335
O=C(c1ccc(cc1)[C@H](N)C)Nc1ccnc2c1cc[nH]2	Y-39983	1.63994
CCN1CCN(CC1)C(c1ccc2c(c1O)nccc2)c1cccs1		1.63893
S=C(N1CCN(CC1)c1ccccn1)N/N=C\1/CCCc2c1nccc2	COTI-2-MO5	1.63861
CC(N(C)C)CN1c2cc(ccc2Sc2c1cccc2)C(=O)C	ACEPROMETAZINE	1.63798
Clc1ccc2c(c1)C(=NCc1c2nc(nc1)Nc1ccc(cc1)C(=O)O)c1c(F)cccc1F	MLN-8054	1.63332
OCCCNCCCc1ccc(c(c1)C(=O)NCC12CC3CC(C2)CC(C1)C3)Cl	AZD-9056	1.63045
O=C1C(=C(C1=O)NC/C=C\COc1nccc(c1)CN1CCCCC1)N	PIBUTIDINE	1.63029
OC[C@H]1O[C@H](C(C1O)O)n1cnc2c1nc(nc2N)n1ncc(c1)C(=O)NC	REGADENOSON	1.63011
CCn1c2ncc(cc2c(=O)n(c2c1nccc2)C)CCOc1cc[n+](c2c1cccc2)[O-]	BILR-355	1.62979
O=C(NS(=O)(=O)Oc1c(cccc1C(C)C)C(C)C)Cc1c(cc(cc1C(C)C)C(C)C)C(C)C	AVASIMIBE	1.62946
CCN(CC#CCOC(=O)C(c1ccccc1)(C1CCCCC1)O)CC	esoxybutynin	1.62866
NCC[C@]12CCC3(CC1=CCC1C2CC[C@]2(C1CCC12OCCO1)C)OCCO3	EDIFOLONE	1.62835
Cc1ccc(=O)n(c1)c1ccccc1	pirfenidone	1.62764
OC(=O)CN(C(=N)N)C	Creatine	1.62641
NC(=N)NCCCCC(=O)Nc1cc(cc(c1O[C@H]1CNCC1)NC(=O)c1ncnc(c1)C(=O)Nc1cc(cc(c1O[C@H]1CNCC1)NC(=O)CCCCNC(=N)N)C(F)(F)F)C(F)(F)F	Brilacidin_:_ PMX-30063	1.62509
O/N=C(/c1nonc1NCCNS(=O)(=O)N)\Nc1ccc(c(c1)Br)F	INCB 024360	1.62428
CSCC[C@@H](C(=O)OC)NC(=O)c1ccc(cc1c1ccccc1C)CNCc1c[nH]cn1	FTI 2153	1.62278
O=C(N[C@@H]([C@H](OC(C)(C)C)C)C(=O)OCc1ccccc1)OCc1ccccc1		1.62242
NC1CCN(CC1)c1ccc(nn1)c1ccccc1Cl		1.6216
CC1=Cc2cc3OCOc3cc2C(=NN1)c1ccc(cc1)N	GYKI 52466	1.62152
COc1cccc(c1C(=O)N[C@@H]1C(=O)N2[C@@H]1SC([C@@H]2C(=O)O)(C)C)OC	Meticillin sodium	1.62087
O=C(N1CCCCC1CN1CCCC1)Cc1ccc(cc1)C(F)(F)F	BRL-52656	1.61942
Cc1cc2c(n1C)nc(nc2N1CCCC1)N1CCCC1	U-89843A	1.61762
FC(c1nccc(c1)[C@@]1(N=C(c2c1cccc2F)N)c1cccc(c1)c1cncnc1)F	AZD-3839	1.617
OCC1OC(C(C1OP(=O)(OC(CNC(=O)CC[C@@]1(C)C2=NC([C@@H]1CC(=O)N)[C@]1(C)N([Co]O)C(=C(C)C3=NC(=CC4=NC(=C2C)[C@@H](CCC(=O)N)C4(C)C)[C@H]([C@]3(C)CC(=O)N)CCC(=O)N)[C@H]([C@]1(C)CC(=O)N)CCC(=O)N)C)[O-])O)n1cnc2c1cc(C)c(c2)C	HYDROXOCOBALAMIN	1.61554
[O-]S(=O)(=O)CCCCN1c2ccc3c(c2C(/C/1=C\C=C\C=C\C=C\C1=[N+](CCCCS(=O)(=O)[O-])c2c(C1(C)C)c1ccccc1cc2)(C)C)cccc3	indocyanin green	1.61481
COc1cc2c(CCNC(=O)C)c[nH]c2cc1Cl		1.6129
CC(=O)CC(c1c(=O)oc2c(c1O)cccc2)c1ccccc1	Warfarin potassium	1.61115
COc1c(OC)c(OC(=O)C)c2c(c1OC(=O)C)ccc(c2)Cl	LONAPALENE	1.60994
CN(C(=O)c1cncc(n1)c1cn(c(n1)C(C)(C)C)CC1(F)CCOCC1)C	KHK-6188	1.60699
O[C@@H]1CC[C@@H](O)[C@H](O)C[C@H](O)C[C@]2(O)C[C@H](O)[C@H]([C@@H](O2)C[C@H](/C=C/C=C/C=C/C=C/C=C/C=C/C=C/[C@@H]([C@H]([C@H]([C@@H](OC(=O)C[C@@H](C1)O)C)C)O)C)O[C@@H]1O[C@H](C)[C@H]([C@@H]([C@@H]1O)N)O)C(=O)O	AMPHOTERICIN B	1.60628
OC(=O)C[C@H]1CCCCN1C(=O)/C=C/c1c(nn2c1cccc2)c1ccccc1	FK 352	1.60436
Fc1ccc(cc1)[C@H]1[C@H](OCCN1Cc1n[nH]c(=O)[nH]1)O[C@@H](c1cc(cc(c1)C(F)(F)F)C(F)(F)F)C	Aprepitant	1.60372
CCOC(=O)CCNC(=O)N[C@H]1CCN(C1=O)c1ccc(cc1)C(=N)N	Orbofiban acetate	1.60194
CSc1nc2sc(c(c2c(n1)c1cccc(c1)OC)N)C(=O)NC(C)(C)C	ORG-43902	1.60019
CNc1ccc(cc1)N1CCN(CC1)C(=O)[C@]1(C)CCc2c(O1)c(C)c(c(c2C)O)C		1.60004
CCOc1ccc(cc1)NC(=S)Nc1ccc(cc1)OCC	ETOCARLIDE	1.59827
COC1CCN(CC1)C(=O)c1cc(ccc1F)C=c1[nH][nH]c(=O)c2c1cccc2	AZD-2461	1.59819
CC1=CC[C@@H](C[C@H]1O)C(O)(C)C	Cyclidrol	1.59756
Clc1ccc(cc1)C(c1ccccc1)OCCN1CCCCC1	CLOPERASTINE	1.59717
OCC1=C(C)C[C@@H](OC1=O)[C@H]([C@H]1CCC2[C@]1(C)CCC1[C@H]2C[C@@H]2[C@]3([C@]1(C)C(=O)C=C[C@@H]3O)O2)C	WITHAFERIN A	1.59679
OC(=O)[C@H](c1c(C)nc2c(c1c1ccc3c4c1nccc4CCO3)cccc2)OC(C)(C)C	BI-224436	1.59634
O/N=C/c1cccc[n+]1COC[n+]1ccc(cc1)C(=O)N	HI-6	1.59632
C=C1CCN(CC1)[C@@H]([C@@](c1ccc(cc1F)F)(Cn1cncn1)O)C	Efinaconazole	1.59594
C/C=C/1\C(=O)C[C@@H]2C1(C)CC[C@H]1[C@H]2CCC2=CC(=O)CCC12C	(Z)-Guggulsterone	1.59537
NC(=O)C1OC(=O)N(C1)c1ccc2c(c1)CC(=O)N2C(C)C	PF-708093	1.5952
COc1ccncc1CN1CCC(CC1)N(C(C)C)CCCCCCCN1CC[C@H](C1)C(c1ccccc1)(c1ccccc1)C(=O)N	THRX-326151	1.59491
COc1c(OC)ncnc1NS(=O)(=O)c1ccc(cc1)N	Sulfadoxine	1.59036
NC(=O)C1OC(=O)N(C1)c1ccc2c(c1)CC(=O)N2C(C)C	PF-708093	1.59028
CCCCCCCCCCCCCCCC(=O)OC[C@H]([C@H]1OC[C@@H]([C@H]1O)O)O	SORBITAN PALMITATE	1.58781
CC(S(=O)(=O)N[C@@H]1COC[C@@H]1Oc1ccc(cc1)c1ccc(s1)C#N)C	PF-4958242	1.58578
CC(CCc1ccccc1)NCC(c1ccc(c(c1)C(=O)N)O)O	labetalol	1.5848
COCCN(Cc1ccc2c(c1)n1cc(sc1n2)C(=O)N(C1CCCCC1)C)C	YM-202074	1.58453
O=C(C(Oc1ccc(cc1)Cl)(C)C)OCCSCCCCCCCCCCSCCOC(=O)C(Oc1ccc(cc1)Cl)(C)C	Tiafibrate	1.58336
CCc1[nH]c(=O)n(c1C(=O)c1ccc(cc1)n1ccnc1C)C(=O)c1ccccc1	analog of CK 3197	1.58308
COc1ccc2c(c1)C(CCC2)C(=O)N(c1ccc(cc1)C(C)C)Cc1ccc(cc1)N(C)C	MP-435	1.58271
Nc1ccc(cc1)[As](=O)(O)O	SODIUM ARSANILATE	1.57981
O=C1OC(=O)C2C1C1CCC2O1	Norcantharidin	1.57924
OC(=O)C(c1c(C)nc2c(c1c1ccc3c(c1)CCCO3)cccc2)OC(C)(C)C		1.5765
OCCSCC(=O)[C@@]1(O)CCC2[C@]1(C)CCC1C2CCC2=CC(=O)CC[C@]12C		1.57466
COc1ccc2c(c1)c(CC(=O)OCCSCC(=O)NCCCOc1cccc(c1)CN1CCCCC1)c(n2C(=O)c1ccc(cc1)Cl)C	CP-6	1.5742
CCC(C(=O)O)Cc1c(I)cc(c(c1I)N)I	IOPANOIC ACID	1.57353
CCC1=C(C)C2=NC1=Cc1n3[Cu]n4c(=C2)c(C=C)c(c4=CC2=NC(=C(c3c(c1C)C(=O)[O-])CC(=O)[O-])C(CCC(=O)[O-])C2C)C		1.57347
CCOC(=O)c1cnc([nH]c1=O)C(C)C		1.56662
Cc1cc(C)nc(n1)N1CC2C(C1)CN(C2)C(=O)c1c(F)cccc1n1ccnn1		1.56644
O=C1OC(C(=C1OCC1CC1)c1ccc(cc1)S(=O)(=O)C)(C)C	Firocoxib	1.56501
CN1C[C@@H]2C[C@@H](C[C@H](C1)N2C)NC(=O)c1nnc2c1cccc2	INDISETRON	1.56288
CCN(CCCCC(c1ccccc1)NC(=O)c1ccc(cc1)[N+](=O)[O-])CC	Nibentan	1.56256
O=c1c2c(n[nH]c2c2c(n1c1ccccc1)nccc2)Cc1ccccc1	PH-CBR-2016-001-HVAC-07875-0I	1.56061
O=C(C(C)C)OC1=C(C(=O)Nc2noc(c2)C)N(C)S(=O)(=O)c2c1cccc2		1.5605
Clc1ccc(s1)c1onc(c1)Cn1c(nc2c1ccc(c2)C(=O)[O-])C(=O)NC1CCN(CC1)C1CC1	AVE-3247	1.55762
N[C@H](c1ccccc1)C(=O)N[C@@H]1C(=O)N2C1SCC(=C2C(=O)O)C	cefalexin HCl monohydrate	1.55615
OC(c1ccccc1)C(=O)O[C@@H]1C[C@@H]2CC[C@H](C1)N2C	Homatropine	1.55233
COc1ncnc(c1)NS(=O)(=O)c1ccc(cc1)N	SULFAMONOMETHOXINE	1.54729
NCCCC[C@@H]1NC(=O)[C@H](CCCNC(=O)N)NC(=O)[C@H](Cc2ccc(cc2)O)NC(=O)[C@H](CSSC[C@H](NC(=O)[C@@H](NC(=O)[C@@H](NC(=O)[C@@H](NC(=O)[C@H]2N(C(=O)[C@@H](NC1=O)CCCCN)CCC2)Cc1ccc(cc1)O)CCCNC(=N)N)CCCNC(=O)N)C(=O)N[C@H](C(=O)N)CCCNC(=N)N)NC(=O)[C@@H](NC(=O)[C@@H](NC(=O)[C@@H](NC(=O)c1ccc(cc1)F)CCCNC(=N)N)CCCNC(=N)N)Cc1ccc2c(c1)cccc2	BKT140	1.54598
OC[C@@H](c1ccccc1)NC(=O)C(c1ccc(cc1)Cn1c2ccccc2c2c1nc(C)cc2C)C1CCCC1	implitapide	1.54447
OC[C@H](Cn1ccc(nc1=O)N)OCP(=O)(O)O	cidofovir gel	1.54438
CCOC(=O)CC(=O)N1CCSC1COc1ccccc1OC	Moguisteine	1.54198
COc1cc(cc(c1OC)OC)C(=O)OCCCN(CCN(CCCOC(=O)c1cc(OC)c(c(c1)OC)OC)C)C	HEXOBENDINE	1.54121
N#Cc1cc(c2ccccc2)c([nH]c1=O)C		1.54068
CCCOc1ccc2c(c1)nc([nH]2)NC(=O)OC	Oxibendazole	1.54006
OCCN(C)C	DEANOL	1.53806
NC1=NCC2N1c1ccccc1Cc1c2cccc1	epinastine, BI	1.53789
CN(C(c1cccnc1)C1COCOC1)C	doxpicomine	1.53276
CN[C@H](C(=O)N[C@H]1CN(CC[C@@H]2N(C1=O)[C@@H](CC2)C(=O)NC(c1ccccc1)c1ccccc1)C(=O)CC(C)C)C	AT-406	1.53133
CCC[C@@H]1O[C@H]2C(O1)(C(=O)CO)C1([C@@H](C2)[C@@H]2C[C@H](F)C3=CC(=O)CCC3([C@]2([C@H](C1)O)F)C)C	ROFLEPONIDE	1.53122
OC(=O)C[C@@H]1NC(=O)CNC1=O		1.53093
COc1ccc(cc1CN[C@@H]1CCCN[C@@H]1c1ccccc1)n1nnnc1C(F)(F)F	VOFOPITANT	1.5302
CN(CCOC(c1ccccc1)(c1ccccc1)C)C	MOXASTINE	1.52897
CCCCCS(=O)(=O)NC(=O)c1ccc2c(c1)n(Cc1ccc(cc1Cl)Cl)c(n2)C	ATx-08-001	1.52843
CCCCCCSc1nsnc1C1=CCCN(C1)C	Tazomeline	1.52748
CCCCCCCCC(=O)NCc1ccc(c(c1)OC)O	NONIVAMIDE	1.52705
COC(c1ccc(nc1)C)CN1CCN(CC1)c1ccccc1	4414-CERM	1.52682
CCN(C(=O)Cc1ccc(cc1)S(=O)(=O)C)C1CCN(CC1)CC[C@@H](c1cc(F)cc(c1)F)C1CCN(CC1)S(=O)(=O)C	AZD-5672	1.52132
Clc1cccc(c1)C(CNCCNc1cccc(c1)c1cc(ccc1C)C(=O)O)O	GW-2696	1.52112
OC(=O)C1=CC2=CC[C@@H]3[C@@H]([C@]2(CC1)C)CC[C@]1([C@H]3CC[C@@H]1C(=O)NC(C)(C)C)C	epristeride	1.52087
Cc1ccccc1N1CCN(CC1)CCc1nnc2n1CCCC2	dapiprazole, ophthalmic	1.51934
Fc1ccc(cc1)CC[N+]12CCC(CC1)[C@H](C2)OC(=O)C(c1ccccc1)(N1CCCCC1)C	AZD-9164	1.51882
COc1ccc2c(c1C)nc(cc2O[C@@H]1C[C@@H]2C(C1)C(=O)N(C)CCCC/C=C\[C@H]1[C@](NC2=O)(C1)C(=O)NS(=O)(=O)C1CC1)c1scc(n1)C(C)C	Simeprevir	1.51756
c1ccc2c(c1)c(c[nH]2)Cc1c[nH]c2c1cccc2	Diindolylmethane	1.51565
ONC(=O)CN(C(=O)N1CCC[C@H]1C(=O)NCCC(C)C)CCC(C)C	VRC-4156	1.51469
CCOC(=O)C(c1ccccc1)N1CCCCC1		1.51452
COc1cc(cc(c1OC)OC)C(=O)c1c(C)oc2c1ccc(c2O)OC	BNC105	1.51312
NC[C@@H](c1ccccc1)O	(R)-2-Amino-1-phenylethanol	1.51244
CCOC(=O)c1cc2cc3ccoc3cc2oc1=O	3-Carbethoxypsoralen	1.51199
O[C@@H]1CCC2([C@@H](C1)C[C@@H]([C@@H]1[C@@H]2CCC2([C@H]1CC[C@@H]2[C@@H](CC(=O)O)C)C)O)C	24-norUrsodeoxycholic acid	1.51134
CC1=C(/C=C/C#Cc2ccc(cc2)C(=O)O)C(CCC1)(C)C	PH-CBR-2016-001-HVAC-09346-0	1.51052
CN(c1ccc2c(c1)Sc1c(N2)ccc(c1)N(C)C)C	Leuco methylthioninium salt	1.51004
O=c1n(Cl)c(=O)[nH]c(=O)n1Cl	TROCLOSENE	1.50946
Oc1ccc(cc1)NC(=O)c1ccccc1O	N-Salicoylaminophenol	1.50891
CCC(=O)[C@@]1(C)[C@H](C)C[C@@H]2C1(C)C[C@H](O)[C@H]1[C@H]2CCC2=CC(=O)C=CC12C	Rimexolone	1.50766
O[C@H]1CC[C@@H]2[C@]1(C)CC[C@H]1[C@H]2CCc2c1ccc(c2)OS(=O)(=O)O	MX-4509	1.5076
O=C(N1CC[C@@H](C1)N[C@@H]1CC[C@](CC1)(O)c1ccc(cn1)c1ncccn1)CNC(=O)c1cccc(c1)C(F)(F)F	INCB-8761	1.50707
O=C1CC[C@]2(C(=C1)[C@@H](C)C[C@@H]1C2CC[C@]2(C1CC[C@]2(OC(=O)C)C(=O)C)C)C	Diviseq	1.50693
CC(C(=O)c1c(nn2c1cccc2)C(C)C)C	ibudilast	1.5039
Cc1ccc2c(c1)c1CCCC3c1n2CCN3	pirlindole	1.50286
CCN(CCNC(=O)N(C(C)C)CCS(=O)(=O)c1ccccc1)CC	suricainide	1.50281
CN(CCSC(=O)N1c2ccccc2C(c2c1cccc2)(C)C)C	botiacrine	1.50174
CCOC(c1cccnc1)CN1CCN(CC1)c1ccccc1OC	IP 66	1.50149
CCC(N(C(=O)c1cc2ccccc2c(n1)c1ccccc1Cl)C)C	PK-11195	1.50062
CSCC[C@@H](C(=O)OC(C)C)NC(=O)c1cc(NC[C@H]2NC[C@H](C2)SC(=O)c2cccnc2)ccc1CCc1ccc(cc1)F	EBP921	1.4975
COc1ccc2c(c1)c(OC(C)C)c(s2=O)C(=O)N	PD 144795	1.49738
Cc1nc(C)cc(c1)c1cc2c(cc1F)c(=O)c(cn2C1CC1)C(=O)O	WIN 57273	1.49727
CCCCCC(CC(=O)CCc1ccc(c(c1)OC)O)O	[6]-gingerol	1.49592
CCN(C(=O)C1CCN(CC1)C(C)C)C(Cc1ccc(cc1)OC)C		1.49566
O[C@@H]1CC[C@H](CC1)N(c1cc(sc1C(=O)O)c1ccccc1)C(=O)C1CCC(CC1)C	VCH-759	1.49344
CC(=O)OCC(=O)[C@@]1(OC(=O)c2ccco2)[C@H](C)C[C@@H]2[C@]1(C)C[C@H](O)[C@]1([C@H]2CCC2=CC(=O)C=C[C@]12C)F	dexamethasone acefurate	1.49337
CC(CCC[C@H]([C@H]1CC[C@@H]2[C@]1(C)CCC/C/2=C\C=C/1\C[C@@H](O)CCC1=C)C)C	Cholecalciferol	1.49207
CO/N=C(\c1ccc(cc1)c1ccc(o1)c1ccc(cc1)/C(=N\OC)/N)/N	PAFURAMIDINE	1.49033
CC(n1c(=O)c(C(=O)NCCCN2CCCCC2)c(c2c1scc2)O)C	VRX-03011 VRX-03011	1.48973
OC(=O)C(c1ccc(cc1)Oc1nccs1)C	ZOLIPROFEN	1.48598
CCC[C@H]1CN(C(=O)C1)[C@H](C(=O)N)CC	brivaracetam	1.48565
NCCCCN	PUTRESCINE	1.48324
NC[C@H]1C[C@@]1(c1ccccc1)C(=O)N(CC)CC	levomilnacipran	1.48267
S=C=Nc1ccc(cc1)[N+](=O)[O-]		1.48219
CC(OC(=O)CCC/C=C\C[C@@H]1[C@@H](/C=C/[C@H](CCc2ccccc2)O)C=CC1=O)C	Posaraprost	1.48102
O=C(c1cc2CCCCCCc2n(c1=O)CC1CCCCC1)NC(C(=O)N1CC(C1)NS(=O)(=O)C)(C)C		1.48084
CCCCc1c(Cc2ccc(cc2)c2ccccc2c2nnn[nH]2)c(O)nc2n1ncn2	UP 27522	1.47938
N#C/C(=C(/O)\C)/C(=O)Nc1ccc(cc1)C(F)(F)F	Teriflunomide	1.47684
CCCCCCCCCC(=O)N[C@H]1[C@@H](O[C@@H]([C@H]([C@@H]1O)O)CO)Oc1c2cc3cc1Oc1ccc(cc1Cl)C[C@@H]1C(=O)N[C@H](C(=O)N[C@H]3C(=O)N[C@H]3C(=O)N[C@@H]([C@@H](c4ccc(O2)c(Cl)c4)O[C@@H]2O[C@H](CO)[C@H]([C@@H]([C@H]2NC(=O)C)O)O)C(=O)NC(c2c(c4cc3ccc4O)c(cc(c2)O)O[C@H]2O[C@H](CO)[C@H]([C@@H]([C@@H]2O)O)O)C(=O)O)c2cc(O)cc(c2)Oc2cc([C@@H](C(=O)N1)[NH3+])ccc2O	Teicoplanin	1.47469
CC(=O)O[C@H]1CC[C@@H]2[C@]1(C)CC[C@H]1[C@H]2CC[C@@H]2[C@]1(C)C(=CC(=O)C2)C	STENBOLONE ACETATE	1.4725
COc1ccc(cc1Oc1ccc(cc1CSC(C)(C)C)NC(=O)C(C)(C)C)CC(=O)O	AM-461	1.47176
CC(=O)O[C@H]1CC[C@]2(C(=CC[C@@H]3[C@@H]2CC[C@]2([C@H]3CC=C2c2cccnc2)C)C1)C	abiraterone acetate	1.4697
O=S1(=O)N[C@H]2CCCN2c2c1cccc2	S-18986	1.46782
Cn1c(nnc1C12CCC(CC1)(CC2)c1noc(n1)C1CC(C1)(F)F)c1ccccc1C(F)(F)F	MK-4101	1.46633
O[C@H]1CC(=O)O[C@@H](C1)/C=C/c1c(c2ccc(cc2)F)c2ccccc2c(=O)n1C(C)C	RP 61969	1.4654
OC(=O)CCCc1cc2c(n1S(=O)(=O)c1ccc3c(c1)scn3)ccc(c2)Cl	IVA-337	1.46327
O=C(C(C)C)NCc1ccc(c(c1)c1nc2cc(ncc2c(=O)n1)c1ccc(cc1)C(F)(F)F)Cl	GRC-27864	1.46284
CC(CC1Nc2cc(Cl)c(cc2S(=O)(=O)N1)S(=O)(=O)N)C	BUTIZIDE	1.46262
Oc1ccc(cc1)S(=O)(=O)O	ZINC PHENOLSULFONATE	1.46257
CCN[C@@H](Cc1cccc(c1)C(F)(F)F)C	Levofenfluramine	1.46225
OC(=O)COc1ccc(cc1c1ccc(c(c1)Cl)C(=O)N1CCCC1(C)C)F	AZD-8075	1.46198
NC(=N)c1ccc(cc1)OCCCOc1ccc(cc1)C(=N)N	PROPAMIDINE ISETHIONATE	1.46131
COc1ccc(c(c1)C(=O)Nc1ccc(cn1)Cl)NC(=O)c1ccc(cc1)C(=N)N(C)C	Betrixaban	1.46092
NCCCNCCCCNC(=O)OCC(=O)NCCCCCCNC(=N)N	Tresperimus triflutate	1.45953
Cc1ccc(c(c1)C(c1ccccc1)CCN(C(C)C)C(C)C)O	tolterodine	1.45843
C[n+]1ccc(cc1)C(=O)NCc1ccccc1	Enisamium iodide	1.45785
CCC[N+]1(C)C2CCC1CC(C2)OC1c2ccccc2SCc2c1cccc2	tipetropium	1.45743
CN(CCn1c2ccccc2c2c1nc1cc(C)c(cc1n2)C)C	B-220	1.45592
CC(OP(=O)(C(P(=O)(OC(C)C)OC(C)C)Cc1cc(c(c(c1)C(C)(C)C)O)C(C)(C)C)OC(C)C)C	Apomine	1.45562
COC1(CCN(CC1)CCc1c[nH]c2c1cc(F)cc2)CS(=O)c1ccccc1	GR159897	1.45323
CN(CCNC(=O)COc1c2cccc1Cc1cccc(c1OCC(=O)NCCN(C)C)Cc1c(c(Cc3c(c(C2)ccc3)OCC(=O)NCCN(C)C)ccc1)OCC(=O)NCCN(C)C)C	KM-0118	1.45292
COc1ccc(cc1)c1c(onc1c1ccc(cc1)OC)CC(=O)O	mofezolac	1.45274
O=S1(=NP(=NP(=N1)(N1CC1)N1CC1)(N1CC1)N1CC1)N1CC1	SOAz	1.44724
COc1cccc(c1)C(=O)CCNC(C(c1ccccc1)O)C	Oxyfedrine hydrochloride	1.44511
COC1(COc2c(O1)cccc2)C1=NCCN1	Methoxy-idazoxan	1.44493
O=C(N1CSCC1)[C@H]1NC[C@H](C1)N1CCN(CC1)c1cc(nn1c1ccccc1)C	teneligliptin	1.44445
OC(c1cc(Cl)c(c(c1)Cl)N)CNC(C)(C)C	clenbuterol	1.44353
OCCCNC(=O)c1cn(CC)c2c(c1=O)cccc2		1.44335
O=C([C@H]1NC[C@H](C1)SC1=C(C(=O)[O-])N2[C@H]([C@H]1C)[C@H](C2=O)[C@H](O)C)Nc1cccc(c1)C(=O)[O-]	Ertapenem disodium	1.44268
COc1cc(N)c(cc1C(=O)NCC1CCN(CC1)CCCn1ccnn1)Cl	DA-6886	1.44132
OC[C@@H](C(=O)N[C@H](C(=O)N[C@@H](C(=O)N[C@H](C(=O)N[C@H](C(=O)N1CCC[C@H]1C(=O)N[C@@H](C(=O)N)C)CCCCNC(C)C)CC(C)C)Cc1ccc(cc1)NC(=O)N)Cc1ccc(cc1)NC(=O)[C@@H]1CC(=O)NC(=O)N1)NC(=O)[C@H](NC(=O)[C@H](NC(=O)[C@@H](Cc1ccc2c(c1)cccc2)NC(=O)C)Cc1ccc(cc1)Cl)Cc1cccnc1	Degarelix	1.44036
CCCCc1nc(cn1c1ccc(cc1)Oc1ccc(cc1)Cl)c1ccc(cc1)OCCCN(CC)CC	Azeliragon	1.43904
OC[C@H]1O[C@H]([C@@H]([C@@H]1O)O)n1cnc2c1ncnc2NCC=C(C)C	RIBOPRINE	1.4386
O=C(Cc1ccc(cc1)F)NC1CCc2c(C1)[nH]c1c2cc(cc1)C		1.4376
CNC(=O)CN1CCC(CC1)Oc1cc2c(ncnc2cc1OC)Nc1cccc(c1F)Cl	Sapitinib	1.43692
CO/N=C(/c1csc(n1)N)\C(=O)N[C@@H]1C(=O)N2[C@@H]1SCC(=C2C(=O)[O-])C[n+]1ccc(cc1)c1cnco1	DQ-2556	1.43692
O=C(NS(=O)(=O)C)CCC/C=C\C[C@H]1C(=O)C[C@H]([C@@H]1/C=C/[C@H](COc1ccccc1)O)O	sulprostone	1.4363
CC(OC(=O)Nc1ccc(cc1)Cl)C	ATI-0917	1.43555
O[C@@H](CN(S(=O)(=O)C)C)CN1C2CCC1CC(C2)NC(=O)c1cc2ccccc2n(c1=O)C(C)C	velusetrag	1.43492
O=c1oc2cc(ccc2c(c1C)C)OS(=O)(=O)C		1.43487
CC(=O)NC[C@@H]1OC(=O)N(C1)c1ccc(cc1)S(=O)C	DUP 105	1.43143
CCOC(c1ccccc1)(c1ccccc1)C(=O)OCCN(C)C	Dimenoxadol	1.43118
[N-]=[N+]=N[C@]1(CO)O[C@H]([C@@H]([C@@H]1O)O)n1ccc(nc1=O)N	R-1479	1.42772
O=C1CC2(CCCC2)CC(=O)N1CCCCN1CCN(CC1)c1ncccn1	buspirone	1.42557
Clc1ccc2c(c1)/C(=C/c1[nH]c(cc1C)C)/C(=O)N2	SU-5614	1.42443
O=C1CCC2=C3C=C[C@]4([C@H]([C@@H]3CCC2=C1)CC[C@]4(C)O)C	METHYLTRIENOLONE	1.4241
O=c1[nH]c(=O)n(cc1F)C1CCCO1	TS-1	1.42389
O=C(Nc1c(C)cccc1Cl)CCN1CCCC2C1CCC2	RODOCAINE	1.42325
OC(=O)CC[C@H]([C@H]1CC[C@@H]2[C@]1(C)CC[C@H]1[C@H]2[C@H](C[C@H]2[C@]1(C)CC[C@H](C2)OS(=O)(=O)O)OS(=O)(=O)O)C	Ursulcholic acid	1.42268
Cc1cc(C)c(c(c1)C(=O)C)NC(=O)c1sccc1S(=O)(=O)Nc1onc(c1C)C	TBC 3711	1.41878
O=C1N=C(CN1c1ccccc1)N1CCCC1		1.41727
OC(=O)CC[C@@H](C(=O)O)NC(=O)N	carglumic acid	1.41637
COC(=O)c1cnc(nc1C(F)(F)F)Nc1cccc(c1)Cl		1.41528
Oc1ccc2c(c1)CC=C1C2CCC2(C1CCC2=O)C	EQUILIN	1.4152
O=C(C(=O)NC1CC(C)(C)NC(C1)(C)C)Nc1ccc(cc1)Cl	NBD-556	1.41334
Cc1c(ccc2c1nccn2)NC1=NCCN1	AGN-191103	1.41215
NC(=NC(=O)c1ccc(c(c1)S(=O)(=O)C)C(C)C)N	Cariporide mesilate	1.41156
CCCNC(=O)c1c(sc2c1CCOC2)NC(=O)C12CC3CC(C2)CC(C1)C3	A-8894190	1.41064
COC(=O)N[C@H](C(=O)N1CCC[C@H]1C(=O)N[C@H](C(=O)C(F)(F)F)C(C)C)C(C)C	ZD 8321	1.40889
Fc1ccc(cc1)C(=O)CCCN1CC[C@H]2[C@@H](C1)c1cccc3c1N2CCN3C	ITI-007	1.40861
CC(C(=O)c1ccc(cc1)OCCCN1CCC(CC1)C(c1ccc(cc1)F)(c1ccc(cc1)F)O)C	AHR 16303B	1.40722
O=c1[nH]c2c(n1C1CCNCC1)cccc2		1.40528
CO[C@@H]1[C@H](O)[C@H](O[C@H]1n1cc(C)c(nc1=O)N)CO		1.40464
FC(C(C(F)(F)F)(F)F)(C(C(C(F)(F)F)(F)F)(F)F)F	perflexane	1.40428
OCCCCc1ccc2c(c1)C(=O)c1sccc1CO2	HP-573	1.40235
Cc1cccn2c1ncc(c2=O)c1nnn[nH]1	Pemirolast potassium	1.40207
CSc1ccc(cc1)CC(N)C	METHYLTHIOAMFETAMINE	1.40191
Brc1ccc(cc1)OC(=O)N1CCN2CCC1CC2	SSR-180711	1.40097
COc1cc(C=Cc2ccc(c(c2)O)OC)cc(c1OC)OC	Combretastatin A-4	1.39975
CCCCc1oc2c(c1C(=O)c1ccc(cc1)OCCCN(CCCC)CCCC)cc(cc2)NS(=O)(=O)C	dronedarone hydrochloride	1.39895
OCC(=O)[C@@]12O[C@](O[C@@H]1C[C@@H]1C2(C)C[C@H](O)[C@]2(C1CCC1=CC(=O)C=CC21C)F)(C)c1ccccc1	AMCINAFIDE	1.39878
CNC1=[O][Gd-3]234567[N+](C1)(CC[N+]6(CC[N+]7(CC(=O)O4)CC(=[O]5)NC)CC(=O)O2)CC(=O)O3	Gadodiamide	1.39874
NC(=O)CN1C=CCC(=C1)C(=O)N	Caricotamide	1.39731
CCC1NCCN(C1)c1cc2c(cc1F)c(=O)c(cn2C1CC1)C(=O)O	PD-160793	1.39503
COc1cc2OC(C)(C)[C@H]([C@H](c2c2c1c(=O)c1c(n2C)cc2c(c1)cccc2)O)O		1.39501
C=CCCCCCSC(=N)N		1.39465
NCCS[As](c1ccc(cc1)Nc1nc(N)nc(n1)N)SCCN	MELARSOMINE	1.39463
[N-]=[N+]=N[C@H]1C[C@@H](O[C@@H]1COP(=O)O)n1cc(C)c(=O)[nH]c1=O	Phosphazid	1.39316
Clc1ccc2c(c1)c(Sc1ccccc1)c(n2)C(=O)N	L 734005	1.39275
NCCCC[C@@H](C(=O)N1CCC[C@H]1C(=O)N[C@H](C(=O)N)C(C)C)NC(=O)[C@@H](NC(=O)C)CSSC[C@@H](C(=O)N[C@H](C(=O)N1CCC[C@H]1C(=O)N[C@H](C(=O)N)C(C)C)CCCCN)NC(=O)C	CZEN 002	1.39235
CCCn1cnc(c1)CC(C(=O)O)CCCN	UK-396082	1.3917
CC(C[C@@H](C(=O)N[C@@H](C(=O)N[C@@H](C(=O)O)Cc1ccccn1)Cc1cn(c2c1cccc2)C)NC(=O)N1CCCCCC1)C	FR-139317	1.39166
CCOP(=O)(OCC)CCCCCCOc1ccc(c(c1)F)OC		1.38929
O[C@H]1[C@@H]2COP(=S)(O)O[C@@H]3[C@@H](COP(=O)(O[C@H]1[C@@H](O2)n1cnc2c1ncnc2N)S)O[C@H]([C@@H]3O)n1cnc2c1ncnc2N	ML RR-S2 CDA	1.38834
CC(c1ccc(c2c(c1)c(C)cc2S(=O)(=O)O)C)C	azulene sodium sulfonate	1.38766
CN(c1c(C)n(n(c1=O)c1ccccc1)C)C	AMINOPHENAZONE	1.38687
COc1ccc(cc1)n1cc(ccc1=O)C(=O)N1CCCC(C1)C		1.38661
O/N=C(/c1cc(ccc1O)C(C)(C)C)\c1ccccc1		1.3846
c1ccc(cn1)N1CCC2(C1)CCCN2	TC-2216	1.3832
OC[C@@H]1O[C@@H](CC1OC(=O)[C@H](C(C)C)N)n1ccc(nc1=O)N	Valtorcitabine dihydrochloride	1.38169
CC(Cc1c[nH]c(c1)C(=O)O)C		1.38156
CCOC(=O)C1(CCN(CC1)CCc1ccc(cc1)NC(=O)C)c1ccccc1		1.38109
C1COc2c(O1)cccc2N1CCN(CC1)C1Cc2c(C1)cccc2	S-15535	1.37802
O=C1NC(=O)C(S1)Cc1ccc(cc1)C(=O)CCc1nc(oc1C)c1ccccc1	Darglitazone	1.37682
CC(=O)O[C@H]1C[C@H](O[C@H]2CC[C@]3([C@@H](C2)CC[C@@H]2[C@@H]3C[C@@H](OC(=O)C)[C@]3([C@]2(O)CC[C@@H]3C2=CC(=O)OC2)C)C)O[C@@H]([C@H]1O[C@H]1C[C@H](OC(=O)C)[C@@H]([C@H](O1)C)O[C@H]1C[C@H](OC(=O)C)[C@@H]([C@H](O1)C)OC(=O)C)C	Digoxin, Derivative of	1.37437
[O-]C(=O)CC(C(C(=O)[O-])O)(C(=O)[O-])O	Garcinia acid	1.37339
CC/C(=C(\c1ccc(cc1)O)/CC)/c1ccc(cc1)O	Diethylstilbestrol	1.37265
OC[C@H]([C@H]([C@@H]([C@H](C(=O)O)O)O)O[C@@H]1O[C@H](CO)[C@@H]([C@@H]([C@H]1O)O)O)O	Lactobionic acid	1.37235
CCCC(=O)O[C@@]1(CC[C@@H]2[C@]1(C)C[C@H](O)[C@H]1[C@H]2CCC2=CC(=O)CC[C@]12C)C(=O)CO	hydrocortisone-17-butyrate	1.37234
OC(=O)CN[C@@H](C(=O)N1CC[C@H]1C(=O)NCc1ccc(cc1)C(=N)N)C1CCCCC1	melagatran	1.37114
CCN(CCOc1c(I)cc(cc1I)C(=O)c1c(CC(=O)OC(CC)C)oc2c1cccc2)CC	ATI-2042	1.37056
ClCCN(c1cnc(nc1O)O)CCCl	Uracil mustard	1.36955
COc1cc(ccc1n1cnc(c1)C)/C=C/1\CCCN(C1=O)[C@H](c1ccc(cc1)F)C	E-2012	1.36916
ClCCNC(=O)Sc1ncnc2c1nc[nH]2	cloturin	1.36597
OC(=O)COc1ccc(cc1C)SCc1nn(nc1C)c1ccc(cc1)C(F)(F)F	not Seladelpar	1.3653
NC(=N)c1ccc(cc1)OCCCCCOc1ccc(cc1)C(=N)N	pentamidine isethionate, Oncozyme	1.36528
OCC1OC(C(C1O)O)N1C=CC(=O)CC1=O	3-DEAZAURIDINE	1.36413
OC(=O)C1Oc2c(C1)cc1c(c2Cl)onc1c1ccccc1F	A-53385	1.36413
C/C(=C\c1ccc(s1)C(=O)O)/c1cc2c(cc1C)C(C)(C)CCC2(C)C	AGN-191659	1.36381
Cc1cn(C2COC(O2)CO)c(=O)[nH]c1=O	DIOXOLANE THYMIDINE	1.36366
CCN(CCCNC(=O)C1Cc2cc(OC)c(cc2S(=O)(=O)O1)OC)CC	16/252	1.36314
O=c1[nH]c(=O)[nH]c(c1)C(=O)N[C@H](C(=O)N1CCC[C@H]1C(=O)N)Cc1nc[nH]c1	orotirelin	1.36312
O=C(NC1CC(C)(C)Oc2c1cccc2)CCN1C(=O)c2c(S1(=O)=O)cccc2		1.36306
CNc1cccc(c1C#N)NC(=O)C(=O)O	WY-41195	1.36246
N#C[C@]1(O)CC[C@@H]2[C@]1(C)CC[C@H]1[C@H]2CCC2=Cc3c(C[C@]12C)cnn3c1ccc(cc1)F	NEBO-174	1.36211
CC(=CCOc1cc(ccc1Cl)NC(=S)c1cscn1)C		1.36024
C1CN2C(=N[C@H](C2)c2ccccc2)S1	levamisole	1.35824
OCc1c(F)cc(cc1S(=O)(=O)C)c1ccc(c(c1)F)n1cc(nc1C(c1c(Cl)cccc1Cl)(C)C)C(O)(C)C	XL-652	1.35739
CCCOc1ccc(cc1c1nc2c(CCC)nn(c2c(=O)[nH]1)C)S(=O)(=O)NCCC1CCCN1C	udenafil	1.35641
NC(=N)N/N=C\1/C=C2C(O)CN(C2=CC1=O)C	adrenochrom	1.3561
OC(=O)COc1cccc(c1)C(N(C(=O)Cc1ccc(c(c1)Cl)Cl)C)CN1CCCC1	ICI204448	1.35606
OC(=O)c1ccc2c(c1)/C(=C/Cn1cnc3c1cc(C)c(c3)C)/c1ccccc1CO2	KW 3635	1.35575
CC(=O)OCC(=O)[C@@]1(O)CC[C@@H]2C1(C)C[C@H](O)[C@H]1[C@H]2C[C@@H](C2=CC(=O)C=CC12C)C	Methylprednisolone acetate	1.35417
CCCCCCCCCCCCCCCCCCCC(=O)N[C@H]1CC[C@]2([C@@H](C1)C[C@H]([C@@H]1C2C[C@H](O)[C@]2(C1CC[C@@H]2[C@@H](CCC(=O)O)C)C)O)C	Aramchol	1.35405
COc1ccc(cc1)C[C@H](NCC(c1cc(O)cc(c1)O)O)C	(R,R)-4-Methoxyfenoterol	1.35237
NCCCC[C@@H]1NC(=O)[C@H](NC(=O)[C@H](Cc2ccccc2)NC(=O)[C@H](CSSC[C@H](NC(=O)[C@@H](NC1=O)[C@H](O)C)C(=O)N[C@@H]([C@H](O)C)CO)NC(=O)[C@@H](Cc1ccccc1)N)Cc1c[nH]c2c1cccc2	Octreotide acetate	1.35147
C[C@@H]1N[C@H](C)CN(C1)c1c(F)c(F)c2c(c1F)n(cc(c2=O)C(=O)O)C1CC1	Orbifloxacin	1.35116
O=C1CCCN1CCCCN1CCN(CC1)c1nccc(c1)C(F)(F)F	Org-13011	1.3498
COc1cc(ccc1Nc1nc2n(n1)ccc(c2)c1ccc(cc1)NC(=O)C(c1ccc(cc1)F)C)S(=O)(=O)C	BAY-1161909	1.34874
NC(=N)NOCC1(COc2cc(C)cc(c2)OS(=O)(=O)c2ccccc2S(=O)(=O)C)CC1	JNJ-6368661	1.34867
CN1CCc2c([C@H](C1)c1cccc3c1OCC3)cc(c(c2)Cl)O	Odapipam acetate	1.34835
CC(NC(=O)C[C@@H]1CCCN(c2c1cccc2)C(=O)c1ccc(cc1Cl)N1CCCC1)C	OPC 51803	1.34817
OCC(C(=O)NC(C(=O)NC(C(=O)N)CCC(=O)N)C(C)C)NC(=O)C(NC(=O)C(Cc1ccccc1)NC(=O)CC1CCCCC1)CCCNC(=N)N		1.34796
ClC(C(c1ccccc1Cl)c1ccc(cc1)Cl)Cl	Mitotane	1.3478
CCOc1ccc2c(c1)sc(n2)S(=O)(=O)N	ETHOXZOLAMIDE	1.34763
OC(=O)c1cc(cc2c1nc(n2Cc1cccc(c1C)C(F)(F)F)C)N1CCOCC1	GSK-2636771	1.34561
COc1ccc2c(c1)ccc(c2)[C@@H](C(=O)O)C	Naproxen sodium	1.345
Nc1cccc(c1)CN1C(Cc2ccccc2)C(O)C(C(N(C1=O)Cc1ccc2c(c1)cnn2)Cc1ccccc1)O	SE 063	1.34412
Cc1cc(OP(=O)(O)O)c2c(c1OP(=O)(O)O)cccc2	Menadiol sodium diphosphate	1.34329
COc1cccc(c1)NC(=O)c1ccc(cc1)CN1CCCC1		1.34265
CCOC(=O)C(CCCOc1ccc2c(c1)C=C(CC2)c1nccn1C)(C)C	FCE 25390	1.34247
CCCCCCC(NN)C	OCTAMOXIN	1.34214
O=C1Nc2ccc(c(c2[C@](N1)(C#CC1CC1)C(F)(F)F)F)F	DPC 963	1.34179
COC(=O)Nc1ccc2c(c1)c1ccc(cc1o2)S(=O)(=O)N[C@H](C(=O)O)C(C)C	MMP-408	1.33942
COCC1(CCN(CC1)CCc1cccs1)N(c1ccccc1)C(=O)CC	Sufentanil citrate	1.33786
Clc1ccc2c(c1)nc1c(c2O)c(=O)nnc1=O	M 241247	1.33709
COc1cc2c(cc1OC)CCN(C2C)S(=O)(=O)C		1.33525
CN1CCC(CC1)Nc1ncc2c(n1)c(ncn2)Nc1ccc(c(c1)Cl)F	Falnidamol	1.33503
NCCCC[C@@H](C(=O)N[C@H](C(=O)N[C@H](C(=O)N[C@H](C(=O)N[C@H](C(=O)NCC(=O)N[C@H](C(=O)O)CCC(=O)N)CCCCN)CC(=O)N)CCCNC(=N)N)CCC(=O)O)NC(=O)[C@@H](NC(=O)[C@@H](NC(=O)[C@@H](NC(=O)[C@@H](NC(=O)[C@@H](NC(=O)[C@@H](NC(=O)[C@@H](NC(=O)CNC(=O)[C@@H](NC(=O)[C@H]([C@H](O)C)NC(=O)[C@@H](NC(=O)[C@H]([C@H](CC)C)NC(=O)[C@@H]1CCCN1C(=O)[C@H](C(C)C)NC(=O)[C@H](Cc1ccccc1)N)Cc1ccccc1)Cc1ccc(cc1)O)CCC(=O)O)CC(C)C)CCC…	[Leu13]-Motilin	1.33472
NC(=O)CS(=O)C(c1ccccc1)c1ccccc1	modafinil d-isomer, short-acting	1.33432
CCOC(=O)c1ccc(cc1NC(=O)c1ccc(cc1)C(=O)O)NC(=O)CC	AM 682	1.33252
N1CC(C1)Oc1ccccc1c1onc(n1)c1ccccc1		1.33224
O[C@@H]1CC[C@]2([C@@H](C1)CCC1C2C(=O)C[C@]2(C1CCC2C(=O)C)C)C	alfaxalone, Pharmos	1.33223
CCN(CCNc1nccc(n1)NCc1ccc(cc1)CNc1nc(Cl)ncc1F)CC		1.32794
[NH-]c1on[n+](c1)N1CCOCC1	LINSIDOMINE	1.32762
Fc1ccc(c(c1)NC1=NCCN1)C	flutonidine	1.32736
CCCc1ccc(c(=O)n1CC(=O)NCc1ccc(nc1C)N)NS(=O)(=O)Cc1ccccc1	L-375052	1.32717
CC(=CCc1c(O)cc(c2c1oc(c1ccc(cc1)C(F)(F)F)c(c2=O)O)O)C	RG-7775	1.3264
CNCCCOc1cc(F)c(c(c1)F)c1c(Cl)nc2n(c1N[C@H](C(F)(F)F)C)ncn2	CEVIPABULIN FUMARATE	1.32609
Cc1cc2c(s1)nc(nc2c1ccccc1F)N1CCNCC1	DDP 225	1.32573
Oc1nc(c(s1)Cc1ccc2c(c1)ccc(c2)OCc1ccccc1F)O	netoglitazone	1.32247
Nc1nc(=O)c2c([nH]1)n(CCC(CO)O)cn2	buciclovir	1.32171
OC[C@@]12CC[C@H]([C@@H]2[C@@H]2[C@](CC1)(C)[C@]1(C)CC[C@@H]3[C@]([C@H]1CC2)(C)CC[C@@H](C3(C)C)O)C(=C)C	Betulin	1.32125
CCc1ccc(cc1)C(=O)C(CN1CCCCC1)C	Eperisone hydrochloride	1.32108
COC(=O)c1ccccc1C(=O)N1CSCC1		1.31857
CCc1cccc2c1nc(s2)Sc1ccc2c(c1)CC[C@@H]1[C@]2(C)CCC(=O)N1C	Izonsteride	1.31805
CC(Oc1ccc(cc1)c1ccccc1C(=O)Nc1ccc2c(n1)ccc(c2)C(=O)N[C@H](C(=O)N(Cc1ccc(cc1)F)C)c1ccccc1)C	PF-2575799	1.31785
CCN(CCOC(=O)c1cccnc1)CC	NICAMETATE	1.31712
C/C=C/1\CC[C@@H]2[C@]1(C)CC[C@H]1[C@H]2[C@@H](O)[C@@H]([C@@H]2[C@]1(C)CC[C@@H](C2)O)O	IPL-576092	1.31524
CCCCC(COC(=O)/C=C/c1ccc(cc1)OC)CC	Bergasol	1.31166
OC(=O)C(c1ccccc1)(c1ccccc1)CCN1CCOCC1		1.31109
C[C@@H]1CCC[C@@H](O)/C=C/C(=O)O[C@@]23[C@@H](/C=C/C1)[C@H](O)C(=C)[C@H]([C@H]3[C@@H](NC2=O)Cc1ccccc1)C	Cytochalasin B	1.30865
CCOC(=O)COc1ccc(cc1C)/C(=N/OCc1sc(nc1C)c1ccc(cc1)C(F)(F)F)/C		1.30842
Nc1ncccc1OCc1ccccc1	AT-464	1.30773
NC(=N)NCCC[C@@H](C(=O)O)NC(=O)[C@@H]1CCCN1C(=O)CNC(=O)[C@@H]1CCCN1C(=O)[C@@H](N)C	D-3800	1.30551
NC(=O)[C@@H]1OC(=O)N(C1)c1ccc(cc1)c1ccc(nc1)c1nnc(s1)C		1.3043
Clc1cccc(c1NC1=NCCN1)Cl	Clonidine	1.30311
COC(=O)c1ccccc1c1c2ccc(=N)cc2oc2c1ccc(c2)N	RHODAMINE-123	1.30294
ON=C(c1ccc(c(c1)S(=O)(=O)NCCc1ccc(cc1OCC(=O)O)c1ccccc1S(=O)(=O)C)O)N		1.30079
CCCC(=O)NCc1ccc(cc1)C(F)(F)F		1.29884
OC(=O)CCCc1ccc(cc1)C(NS(=O)(=O)c1ccc(cc1)F)CCCC(C(F)(F)F)(F)F	(+)-RS 635	1.29874
Clc1ccc(cc1)OS(=O)(=O)c1ccc(cc1)Cl	Miticide K 101	1.29842
CCc1ccccc1c1n[nH]c(n1)c1cccc(c1)OC	DL-111	1.29773
OCC1CS[As](S1)c1ccc(cc1)Nc1nc(N)nc(n1)N	Melarsoprol	1.29742
O=C(N1CCCC1)Cn1c2ccccc2c2c1nc(nc2N1CCCC1)N1CCCC1	PNU-142731A	1.29517
CCc1cccc(c1)N(C(=N)Nc1cccc2c1cccc2)C	APTIGANEL	1.29294
CCCC(c1ccc(cc1)CC(C)C)Oc1ccc(cc1)C(=O)c1cc(n2c1cccc2)CCCC(=O)O	FR-146687	1.2929
C1CCN(CC1)CCOc1cccc(c1)c1n[nH]c2c1cc(cc2)c1[nH]ncn1	JNK-401	1.29242
CC(CN(S(=O)(=O)c1scc(n1)C)c1cc2CCCc2cc1OCc1ccc(cc1)C(=O)O)C		1.29209
CNc1n(C)nc2c1CCCC2	TETRYDAMINE	1.29191
Nc1ncc(nc1Nc1ccc2c(c1)ccn2)c1ccccc1C		1.29117
CCN(c1ccc(cc1Br)C(C)C)c1nc(cc(n1)C)N1CCC(=CC1)c1cccc(c1)F	CRA 1001	1.29019
O=C(c1cc2c(o1)cccc2)N1CCN(CC1)Cc1ccccc1	BEFURALINE	1.28992
O=C1CCC2(C(=O)N1)CCC(=O)c1c2ccc(c1)Cl		1.28871
CN1CCN2C(C1)c1ccccc1Cc1c2cccc1	mianserin	1.28795
OCC(=O)[C@@]1(O)[C@H](O)C[C@@H]2[C@]1(C)C[C@H](O)[C@]1([C@H]2CCC2=CC(=O)C=C[C@]12C)F	triamcinolone, Allergan	1.28792
OC(=O)COC[C@@H]1CC[C@H](CC1)COC(=O)N(c1ccc(cc1)Cl)c1ccccc1	Ralinepag	1.28782
COc1cc(c(cc1C=C)C(=O)Nc1ccc(cc1)C(=N)N)c1ccc(nc1C(=O)O)C(=O)NCC1CC1	Avoralstat	1.28764
CCN(CCNC(=O)c1cc(Cl)c(cc1OC(C(=O)C)C)N)CC	Batanopride hydrochloride	1.28703
CCCCC/C=C\C/C=C\C/C=C\C/C=C\CCCC(=O)O	Arachidonic acid	1.28454
CCCCc1nc(CCCC)nc(=O)c1Cc1ccc(cc1)c1ccccc1c1nnnn1	CGP 48369	1.28181
OC[C@@](c1ncc(n1)c1ccc(c(c1)C(F)(F)F)OCCc1ccc(cc1)c1ccccc1)(N)C	2018682	1.28121
CN1CCN(CC1)CC(=O)n1c2ccccc2c(=O)[nH]c2c1nccc2	pirenzepine	1.28117
OC(CN1CCCC1)COc1ccccc1C		1.27875
CC(=O)O[C@@H]1C[C@]2(C)[C@H](CC[C@@]2(C2C1[C@@]1(C)CC[C@@H](C[C@H]1CC2)OC(=O)C)O)c1ccc(=O)oc1	Gamabutotalin, Derivative of	1.27859
CNC(=O)CCN1CCN(CC1)CC/C=C\1/c2ccccc2Sc2c1cc(Cl)cc2	CLOTHIXAMIDE	1.27799
COc1cc(ccc1OC)N(C(=O)c1ccc(cc1)[N+](=O)[O-])CCCN(CCc1ccc(c(c1)OC)OC)C	BRL-32872A	1.27797
OC[C@H]1CN(C(=O)O1)c1ccc(c(c1)F)N1CCN(N=C1)C	LCB-010371	1.27755
CCc1nc(C)ccc1O	Emoxipin hydrochloride	1.27722
CCCCCCCCCCCC(=O)NCCc1c[nH]c2c1cc(OC)cc2		1.27708
OCC(COC(=O)[C@@]12CC[C@H]([C@@H]2[C@@H]2[C@](CC1)(C)[C@]1(C)CC[C@@H]3[C@]([C@H]1CC2)(C)CC[C@@H](C3(C)C)OC(=O)C)C(=C)C)(CO)N	NVX-207	1.27468
O[C@H]1CO[C@]2([C@@H]1OC(=O)[C@]2(O)c1ccc(o1)C)O	methoxatone	1.27415
O=C1SC[C@H](N1)[C@@]1(O)C[C@H]2C[C@H](O1)CC[C@H](C)/C=C\CC/C(=C\C(=O)O2)/C	Latrunculin B	1.27378
Cc1ccc(cc1)C(=O)CC(S(=O)(=O)c1ccccc1)c1ccccc1		1.27346
O=C(N[C@H](C(=O)Nc1ccc(cc1)C1S/C(=N\c2cccc(c2)F)/N(C1=O)Cc1cccs1)C)Cc1ccccc1		1.27319
Oc1ccc(c(c1)Cl)C(CNC(C)(C)C)O	HOKU-81	1.27293
CCN(c1cc(C)nc2n1ncn2)CC	trapidil	1.27273
Cc1cnc(c(c1OCC1COC(OC1)(C)C)C)CSc1nc2c([nH]1)cccc2	analog of E-3710	1.27093
N#CCc1c(C)nc2n1cccc2OCc1ccccc1	Sch-28080	1.27048
COC(=O)C1=C[C@]2(CC)CCCN3[C@@H]2c2n1c1ccccc1c2CC3	cis-Apovincamine	1.26889
CCC(C(=O)O[C@@H]1C[C@H]2CC[C@@H](C1)N2C)Sc1ccccc1		1.26845
O=C1C=C[C@]2(C(=C1)CC[C@@H]1[C@]2(F)[C@@H](O)C[C@]2([C@H]1C[C@H]([C@]2(O)C(=O)COP(=O)([O-])[O-])C)C)C	Dexamethasone sodium phosphate	1.26738
COc1cc(OC)cc2c1c(C)c(o2)C(=O)c1ccc(cc1)Br	BMDB	1.26727
Oc1c(CN2CCCC2)cc(cc1CN1CCCC1)Nc1ncnc2c1cccc2	Changrolin	1.26719
CCN(CCc1ccc2c(c1)C(=O)c1ccccc1CO2)O	P 8892	1.26662
CN(CC(N(C)C)CN1c2ccccc2Sc2c1cccc2)C	AMINOPROMAZINE	1.26659
O=C1C=C[C@]2(C(=C1)CC[C@@H]1C2CC[C@]2(C1CCC(=O)O2)C)C	Testolactone	1.26587
C=CCc1c(ccc2c1cc1Cn3c(c1n2)cc1c(c3=O)COC(=O)[C@]1(O)CC)OC(=O)N1CCC(CC1)N1CCCCC1	Simmitecan hydrochloride	1.26571
Fc1ccc(cc1)Cc1ccc(o1)C(=O)C=C(c1[nH]cnn1)O	S-1360	1.26564
CCCCC1CCc2c3n1c(C)c(c3cc(c2)O)CCN1CCN(CC1)c1nccc(c1)C	KC 11404	1.26547
O=C1C(c2ccc(cc2)F)C(=O)c2c1cccc2	FLUINDIONE	1.26466
COC(=O)NC(C(=O)N1CCCC1c1ncc(n1)c1ccc(cc1)c1ccc(cc1OC(F)(F)F)NC(=O)c1ccc(nc1)N1CC(C)N(CC1C)C(=O)NC)C(C)C	TD-6450	1.26459
COc1ccnc2c1c(c[nH]2)C(=O)C(=O)N1CCN(C[C@H]1C)C(=O)c1ccccc1	BMS-378806	1.26441
COC[C@H]1C[C@](N([C@H]1c1nccs1)C(=O)c1ccc(c(c1)OC)C(C)(C)C)(C#N)Cn1cccn1		1.26401
Clc1nn(c(c1)c1ccc(cc1)S(=O)(=O)C)c1ccccc1	FR 188582	1.26312
C=CCC1(CCCC)C(=O)NC(=O)NC1=O	IDOBUTAL	1.26246
Clc1ccc2c(c1)N(CCCN1CCC(CC1)(C(=O)N)N1CCCCC1)c1ccccc1CC2	CLOCAPRAMINE	1.26243
N#CN/C(=N\C(CC)(C)C)/Nc1cccnc1	P-1075	1.26196
O=S(c1nc2c([nH]1)cccc2)Cc1nccc(c1C)OCC(F)(F)F	dexlansoprazole	1.26182
Fc1cccc(c1)CNCC(=O)N[C@@H](C(C)(C)C)C(=O)N[C@H]([C@H](CN(S(=O)(=O)c1cccc(c1)N)CC(C)C)O)Cc1ccccc1	DPC-681	1.26073
CCCCCCCCN=c1ccn(cc1)CCCCCCCCCCn1ccc(=NCCCCCCCC)cc1	octenidine	1.26072
CCCCCCCCCCC(=O)O[C@H]1CC[C@@H]2[C@]1(C)CC[C@H]1[C@H]2CCC2=CC(=O)CC[C@]12C	testosterone undecanoate	1.25962
Clc1ccc(cc1)[C@@H]1CC[C@H](CC1)C1=C(O)C(=O)c2c(C1=O)cccc2	atovaquone	1.25882
O=C1CC[C@]2(C(=C1)CC[C@@H]1[C@@H]2CC[C@]2([C@H]1CC[C@@H]2C(=O)C)C)C	Progesterone	1.25705
COc1nccnc1NS(=O)(=O)c1ccc(cc1)N	SULFALENE	1.25682
OCCONC(=O)c1cc2n(C)cnc2c(c1Nc1ccc(cc1F)Br)F	binimetinib	1.25449
COc1cc(OC)c(cc1/C=C/C(=O)c1ccc(cc1)C(=O)O)c1cc2c([nH]1)cccc2	VCAM-1 antagonists	1.25405
O=C(Nc1scc(c1C(=O)O)c1cccs1)CCCCC(=O)Nc1scc(c1C(=O)O)c1cccs1	TM-5007	1.24972
COc1cc(OCC(CN2CCN(CC2)c2ccccc2OC)O)cc(c1OC)OC	Enciprazine	1.2495
COc1ccc2c3c1OC1C43CC[N+](C(C2)C4C=CC1O)(C)C	Codeine methylbromide	1.24865
[S-][Mo](=S)(=S)[S-]	choline tetrathiomolybdate	1.24696
O=C(Nc1ccccc1CCC1CCCCN1C)/C=C/c1ccccc1	VEN309	1.24691
O[C@H]1CC[C@@H]2[C@]1(C)CC[C@H]1[C@H]2CCc2c1ccc(c2)OS(=O)(=O)N	J 995	1.24658
O=C([C@H]1CCCN([C@H]1c1ccc(cc1)NC1CCCC1)C(=O)c1c(C)cccc1F)Nc1ccc(c(c1)C(F)(F)F)C	CCX-168	1.2457
OCC(C(C(=O)NCCCC(=O)O)O)(C)C	calcium hopantothenate	1.24419
OCC1=CCC(CC1)C(=C)C	perillyl alcohol	1.2435
CNC(=O)[C@@H](NC(=O)C1CCCCC1)C/C=C/c1ccc(cc1)N(c1ncccn1)C		1.24348
N#CC[C@@H](n1ncc(c1)c1ncnc2c1cc[nH]2)C1CCCC1	ruxolitinib	1.24203
O=C1CC[C@]2(C(=C1)C(=CC1C2CC[C@]2(C1CC[C@]2(OC(=O)C)C(=O)C)C)C)C	megestrol acetate, Par	1.24201
CCCNC(C(=O)Nc1c(C)csc1C(=O)OC)C	Articaine hydrochloride	1.24194
CN(c1ccc(cc1)NC(=O)N(C1CCCCCC1)Cc1cccc(c1)CN(C(=O)Nc1ccc(cc1)N(C)C)C1CCCCCC1)C	YM 17E	1.24127
FC(c1ccc2c(c1)N(CCCN1CCN(CC1)CCC1OCCCO1)c1c(S2)cccc1)(F)F	OXAFLUMAZINE	1.24122
OC(=O)CCCCCCNC1c2ccccc2CCc2c1cccc2	amineptine	1.24067
N[C@H](Cc1cc(F)c(cc1F)F)CC(=O)N1CCn2c(C1)nnc2C(F)(F)F	sitagliptin phosphate	1.23991
Fc1ccc(c(c1)C(F)(F)F)C(=O)Nc1ccc2c(c1)B(O)OC2(C)C	SCYX-7158	1.23952
N#C[C@@]1(CC[C@@](NC1)(CO[C@@H](c1cc(cc(c1)C(F)(F)F)C(F)(F)F)C)c1ccccc1)n1cn[nH]c1=O	SCH-900978	1.23792
CNC[C@@H]1CC[C@H]([C@H](O1)O[C@@H]1[C@@H](N)C[C@H]([C@@H]([C@H]1O)O[C@H]1OC[C@]([C@@H]([C@H]1O)NC)(C)O)N)N	Micronomicin sulfate	1.23699
Cc1noc(c1)C1CCCN1	A 82695	1.23566
CCCCCCCCNC(=N)NC(=N)NCc1ccc(c(c1)Cl)Cl	OLANEXIDINE	1.23393
Fc1ccc(cc1)C(=O)C1CCN(CC1)CCc1c(C)nc2n(c1=O)cccc2	PIRENPERONE	1.23292
F[C@@H]1CCN(C1)S(=O)(=O)Nc1ccc(c(c1F)C(=O)c1c[nH]c2c1cc(cn2)c1cnc(nc1)C1CC1)F	PLX-8394	1.23229
OC[C@@H](C(C)C)Nc1nc(Nc2cccc(c2)Cl)c2c(n1)n(cn2)C(C)C	Purvalanol A	1.23161
CCCCC[C@@H](/C=C/[C@H]1[C@H](O)CC(=O)[C@@H]1C/C=C\CCCC(=O)O)O	Prostaglandin E2	1.23096
Cc1cn(C2OC(C=C2)CO)c(=O)[nH]c1=O	stavudine	1.23095
COc1ccc(cc1)CN(c1ncccn1)CCN(C)C	THONZYLAMINE	1.23035
OCC(=O)[C@@]1(O)[C@H](C)C[C@@H]2[C@]1(C)C[C@H](O)[C@]1([C@H]2C[C@@H](C2=CC(=O)C(=C[C@]12C)Cl)F)F	halometasone	1.22914
COc1ccc2c(c1)c(CC(=O)OCC(=O)O)c(n2C(=O)c1ccc(cc1)Cl)C	acemetacin	1.22782
CCc1cc(C(=O)C)c(cc1OCCCCCC(c1nnn[nH]1)(C)C)O	LY 255283	1.22772
CC(NCCN(S(=O)(=O)c1ccc(cc1)NS(=O)(=O)C)C(C)C)C	Wy-48986	1.22745
OC(=O)C1NCCN(C1)CCCP(=O)(O)O	(±)-CPP	1.22685
COc1ccc(cc1)CCN1CCC(CC1)Nc1nc2c(n1Cc1ccc(cc1)F)cccc2	astemizole	1.22657
NCCC(c1cccc(c1)OCC1CCCCC1)O	Emixustat hydrochloride	1.22532
Nc1nc(cc(n1)c1ccc(cc1)C[C@@H](C(=O)O)N)O[C@@H](C(F)(F)F)c1ccc(cc1n1ccc(n1)C)Cl	LX1033	1.22527
OB(O)O	BORIC ACID	1.22527
CSCC[C@@H](C(=O)O)NC(=O)c1ccc(cc1c1ccccc1C)CNCc1c[nH]cn1	FTI-2148	1.22517
CN1CCN(CC1)C[C@@H]1C(=O)Nc2c(S[C@@H]1c1ccccc1)cccc2	BTM-1042	1.22341
CN1CCC2C(C1)c1ccc(c(c1CC2c1ccccc1)O)O		1.22249
OC[C@H](c1ccccc1)C(=O)O[C@@H]1C[C@@H]2[C@@H]3[C@H]([C@H](C1)[N+]2(C)C)O3	Methscopolamine bromide	1.22117
COC(=O)Nc1c(N)nc(nc1N)c1nn(c2c1cccn2)Cc1ccccc1F	BAY-60-4552	1.21992
COP(=O)(OC=C(Cl)Cl)OC	DICHLORVOS	1.21991
OC(=O)C/C=C(\C(=O)N[C@@H]1C(=O)N2[C@@H]1SCC=C2C(=O)O)/c1csc(n1)N	ceftibuten	1.21886
Cc1ccc(c(c1)S(=O)(=O)O)N1CCNCC1	CALDARET	1.21786
CN(Cc1ccc(o1)CSCCNC(=O)c1ccc[n+](c1)[O-])C	RAMIXOTIDINE	1.21699
OC(=O)Cc1ccc(cc1)NC(=O)C	Actarit	1.21439
NCCS	Mercaptamine hydrochloride	1.21346
Cc1cccc(n1)C(=O)Nc1nnn[nH]1	TA-5707	1.21314
Oc1nccc2c1ccc(c2)OC1CCNCC1	SAR-407899	1.21297
CC(=O)O[C@H]1CC[C@]2(C(=CC[C@@H]3[C@@H]2CC[C@]2([C@H]3CC[C@@H]2OC(=O)C)C)C1)C	Androstenediol diacetate	1.21295
NCC1(CN)CCC(CC1)C		1.21263
OC[C@H]1O[C@@H](O)[C@@H]([C@H]([C@@H]1O)O)O	SH-U-454	1.2126
CCCCNC(=O)C(CCC)N		1.21202
Nc1nc(N)c2c(n1)nc(c(n2)c1ccccc1)N	triamterene	1.21001
CNC(=S)NCO	NOXYTHIOLIN	1.20941
CCOC(=O)Nc1ccc(cc1N)NCc1ccc(cc1)F	ezogabine	1.20897
CC#CCC([C@@H](/C=C/C1[C@H](O)C[C@H]2[C@@H]1c1cccc(c1O2)CCCC(=O)O)O)C	beraprost sodium	1.20852
Fc1ccc2c(c1)c(=O)cc(o2)C(=O)NC1CCN(CC1)Cc1ccc2c(c1)OCO2	A-761	1.20743
O=C(c1cc(cc(c1)[Si](C)(C)C)[Si](C)(C)C)Nc1ccc(cc1)C(=O)O	TAC-101	1.20726
CN(CCOC(=O)CO/N=C(/c1ccc(cc1)Cl)\C)C	CLOXIMATE	1.20685
CC(C(=O)Nc1c(C)cccc1C)N	tocainide	1.20665
O=S1(=O)OCCOS(=O)(=O)C1	cyclodisone	1.2065
O=C([C@@H]1[C@H](C1(C)C)C=C(Cl)Cl)OCc1c(F)c(F)c(c(c1F)F)F	Fenfluthrin	1.20585
O=CN1CCN(CC1)c1ncc2c(n1)ncc(c2=O)C(=O)NC(c1ccc(cc1)O)C(=O)N[C@@H]1C(=O)N2[C@@H]1SC([C@@H]2C(=O)O)(C)C	PL-385	1.20517
O=[As]O[As]=O	ARSENIC TRIOXIDE	1.20477
NC1C[C@@]2([C@H]1CN(C2)c1nc2c(cc1F)c(=O)c(cn2C1CC1)C(=O)O)C	ECENOFLOXACIN	1.20321
O=C(c1cn(c2c1cc(O)cc2)Cc1ccc(cc1)F)C(=O)Nc1c(Cl)cncc1Cl	GW842470X	1.20209
N#Cc1ccc(cc1)[C@@H]1CN(C[C@@]21C(=O)N(C(=O)N2C)c1cc(Cl)cc(c1)Cl)c1ccc(cn1)C(=O)O	BMS-688521	1.20032
CCc1nc(N)nc(c1c1ccc(cc1)Cl)N	pyrimethamine	1.19992
CC(CNc1nc(=O)c2c3n1CC=C(n3nc2)c1cccc(c1)C(F)(F)F)C	CL 287663	1.19905
OC[C@@H](C(=O)N[C@H](C(=O)N[C@H](C(=O)N[C@H](C(=O)N[C@H](C(=O)N[C@H](C(=O)NCC(=O)N[C@H](C(=O)O)Cc1ccc(cc1)O)CCCNC(=N)N)CC(C)C)CC(=O)N)CCCNC(=N)N)CC(C)C)NC(=O)[C@@H](NC(=O)[C@H](CCCNC(=N)N)N)CCC(=O)O	ALLOTRAP 07	1.1984
CSCC[C@@H](C(=O)N[C@H](C(=O)N[C@H](C(=O)N[C@H](C(=O)O)CC(=O)N)CCC(=O)N)CCSC)NC(=O)[C@@H](NC(=O)[C@H](Cc1c[nH]c2c1cccc2)NC(=O)[C@H]([C@H](CC)C)NC(=O)[C@H]([C@H](CC)C)NC(=O)[C@@H](NC(=O)[C@@H](NC(=O)[C@@H](NC(=O)[C@@H](NC(=O)[C@@H](NC(=O)[C@H]([C@H](O)C)N)CO)CC(C)C)CC(=O)O)C)CO)C	Disitertide	1.19811
OC(=O)c1ccccc1O	salicylic acid	1.19766
OC(=O)Cc1ccc(cc1)C1CCCCC1		1.19668
N#CCOC(=O)[C@@]1(OC(=O)C2C(C2(C)C)(C)C)[C@H](C)C[C@@H]2[C@]1(C)C[C@H](O)[C@]1([C@H]2C[C@@H](C2=CC(=O)C=C[C@]12C)F)F	GSK-870086	1.19577
CN(CC1OCCn2cc(c3c2cccc3)C2=C(c3cn(CC1)c1ccccc31)C(=O)NC2=O)C	Ruboxistaurin hydrochloride	1.19556
COc1ccc(cc1)C1(CCCN(C)C)OCc2c1ccc(c2)C#N	DA-8031	1.1955
CCC(C(c1ccccc1)(C#N)CCN1CCCCC1)C		1.19521
Fc1cc(cc(c1)F)N[C@@H](c1cc(cc2c1oc(cc2=O)N1CCOCC1)C(=O)N(C)C)C	AZD-8186	1.19179
CCN(CCNC(=O)c1cc(C#N)c(cc1OC)Cl)CC	CGP 25454A	1.19164
CCN(Cc1cccc(c1)OCc1scc(c1)c1cscc1)C/C=C/C#CC(C)(C)C	NB 598	1.18937
c1ccc(cc1)C1=CCN(CC1)CC1CCC=C(C1)c1ccccc1	CI 1007	1.18799
OC(=O)CC[C@@H](C(=O)O)NC(=O)c1cc(c(s1)CCC1CNc2c(C1)c(=O)[nH]c(n2)N)C	Pelitrexol	1.18786
Oc1ccc2c(c1)CC[C@@H]1[C@@H]2CC[C@]2([C@H]1[C@@H](O)[C@H]([C@@H]2O)O)C	Estetrol	1.18749
OC(=O)CC(c1cccnc1)NC(=O)[C@@H]1CCCN(C1)C(=O)CCC1CCNCC1	ELAROFIBAN	1.18742
OC[C@@](C(=O)Nc1ccc(cc1)OCCc1ccc(cc1)c1ccccc1)(N)C	PPI-4667	1.18703
N#Cc1ccc(cc1)Cc1cc(c2n1cccc2)C(=O)C(=O)Nc1snc(c1)C	STA 5312	1.18633
COc1ccc2c3c1O[C@@H]1[C@@]43CCN([C@H](C2)[C@@H]4C=C[C@@H]1O)C	Codeine phosphate	1.18589
C#Cc1cncc(c1)[C@@H]1CCCN1C	Altinicline maleate	1.18572
[NH-]c1on[n+](c1)N1CCOCC1	Linsidomine	1.18421
CN(CCOC(c1ccc(cc1)Br)c1ccccc1)C	BROMODIPHENHYDRAMINE HYDROCHLORIDE	1.18419
CC(=O)NC[C@@H]1OC(=O)N(C1)c1ccc(c(c1)F)N1CCN(CC1)c1ccccn1	VRC-327	1.18353
CCOC(=O)C1CCN(CC1)c1nc(ccc1[N+](=O)[O-])N(S(=O)(=O)c1ccc(cc1)Cl)C		1.18264
COc1cc2ncnc(c2cc1OCCCN1CCOCC1)Nc1cccc(c1)C#C	CP-545130	1.18252
N#Cc1ccc2c(c1)[C@@H](N1CCCC1=O)[C@@H](C(O2)(C)C)O	Cromakalim	1.18199
N=C1C=CC(=C(c2ccc(c(c2)C)N)c2ccc(c(c2)C)N)C=C1	CARBOL-FUCHSIN	1.18186
COc1ccc(cc1)C1=C(C(=O)O)[C@H](Oc2c1cc(cc2)OC(C)C)c1ccc2c(c1)OCO2	S-1255	1.18162
CNS(=O)(=O)Nc1nccc(c1F)Cc1c(=O)oc2c(c1C)ccc(c2)Oc1ncccn1	RO-5126766	1.18087
Clc1ccc(cc1)C1=NCC(=O)N(c2c1cc(Cl)cc2)C	Chlordiazepam	1.1786
OC(=O)CCNC(=O)c1ccc(cc1)[C@@H](Oc1cc(C)c(c(c1)C)c1ccc(cc1)C(C)(C)C)CCC(F)(F)F	LY-2409021	1.17844
OC[C@@H]1O[C@@H](C[C@H]1O)n1cc(C)c(=O)[nH]c1=O	Telbivudine	1.17827
Fc1ccc2c(c1)C(OCC1CC1)(c1c(N2)[n+]([O-])ccc1)C(F)(F)F	DPC-A78277	1.17789
COc1c(cc(cc1C(C)(C)C)n1ccc(=O)[nH]c1=O)c1ccc2c(c1)ccc(c2)NS(=O)(=O)C	Dasabuvir	1.17757
Clc1ccc(cc1S(=O)(=O)N)S(=O)(=O)N(CC1(C)CCCO1)C	Mefruside	1.17705
CC([C@@H](C(=O)O)NC(=O)c1onc(c1)c1ccc(cc1)Nc1nc2c(s1)cc(cc2)F)C	P-7435	1.17634
NC(=O)c1ccn2c1CSC2c1cccnc1	RP-48740	1.17632
COc1cc(NCCCCCNC(C)C)c2c(c1)cccn2	PENTAQUINE	1.17597
OC(COc1ccc(cc1)NC(=O)C)CNC(C)C	PRACTOLOL	1.17596
O=C1NC(C(=O)N1c1ccc(c(c1)C(F)(F)F)[N+](=O)[O-])(C)C	nilutamide	1.17588
COc1cc(C)nc(c1CNC(=O)c1c(C)n(c2c1cccc2)[C@@H](C1CCN(CC1)CC(F)(F)F)C)O	CPI-1205	1.17448
CCOc1ccccc1OCCN[C@@H](Cc1cc2ccn(c2c(c1)C(=O)N)CCCOC(=O)C(C)(C)C)C	KRG-3332	1.17422
CCC(=O)N(C1(CCN(CC1)CCn1nnn(c1=O)CC)c1ccccc1)c1ccccc1F	TREFENTANIL	1.17283
NCCCN([C@@H](c1oc2cc(Cl)ccc2c(=O)c1Cc1ccccc1)C(C)C)C(=O)c1ccc(cc1)C	SB-743921	1.17193
NCc1cc(no1)O	Muscimol	1.17063
O=C1NC(=O)C2(N1)CC(Oc1c2cc(F)cc1)C(=O)N	Fidarestat	1.17057
Clc1cc2N=C(CSCc3ccccc3)NS(=O)(=O)c2cc1S(=O)(=O)N	BENZTHIAZIDE	1.17019
O=C(c1ccccc1N)OCCC1CCCCN1	PIRIDOCAINE	1.16878
O1CCN(CC1)CCn1c2ccccc2c2c1nc(nc2N1CCCC1)N1CCCC1	U 104067F	1.16871
COc1ccc2c(c1)N(CCCN(C)C)c1c(S2)cccc1	METHOXYPROMAZINE	1.16869
COc1ccc(cc1)/C=C/CCCCOc1ccc2c(c1CCC(=O)O)oc1c(c2=O)cc(cc1)C(=O)O	LY 210073	1.16814
O=C1CC[C@]2(C(=C1)CC[C@@H]1[C@@H]2[C@@H](O)C[C@]2([C@H]1CCC2=O)C)C	NPC-01	1.16793
O=CC([C@@]1(O)C[C@H](O[C@H]2C[C@H](N)[C@@H]([C@@H](O2)C)O)c2c(C1)c(O)c1c(c2O)C(=O)c2c(C1=O)cccc2OC)NNC(=O)CCCCCN1C(=O)C=CC1=O		1.16468
O=C(C(SC(=O)c1cccs1)C)NC1CCSC1=O	Midesteine	1.16359
Cc1c(c2ccccc2)[n+](c2n1cccc2)/N=N/[n+]1c2ccccn2c(c1c1ccccc1)C	fazadinium bromide	1.16329
CN(CCOC(c1ccccc1)c1ccccc1)C	Diphenhydramine hydrochloride	1.16216
CCCn1c2nc([nH]c2c(=O)n(c1=O)CCC)C1CCCC1	PD-116948	1.16179
O/N=C/1\CCN(C(=O)c2c1ccn2CCCCN1CCC(CC1)C(=O)c1ccc(cc1)F)C	SUN 9221	1.16097
CCN(CCN1c2cc(cc(c2[C@@](C1=O)(O)c1ccccc1Cl)C(F)(F)F)C(=O)N)CC	PH-CBR-2016-001-HVAC-11062-0I	1.1608
CCCCS(=O)(=O)N[C@H](C(=O)O)Cc1ccc(cc1)OCCCCC1CCNCC1	tirofiban hydrochloride	1.16031
CC(Cc1sc(nc1c1ccc(o1)P(=O)(O)O)N)C	MB-05032	1.15997
Clc1cncc(n1)C1CN2CCC1CC2	L 689660	1.1589
CSCC[C@H](N(C(=O)[C@H](Cc1ccccc1)NC(=O)CNC(=O)[C@H](NC(=O)[C@H](Cc1ccc(cc1)O)N)C)C)C(=O)N	metkephamide	1.15889
COC1/C=C/OC2(C)Oc3c(C2=O)c2c(O)c(/C=N/N4CCN(CC4)C)c(c(c2c(c3C)O)O)NC(=O)/C(=C\C=C\C(C(C(C(C(C(C1C)OC(=O)C)C)O)C)O)C)/C	rifampicin	1.15806
CC(=CCOc1cc(ccc1Cl)NC(=O)c1ncsc1C)C		1.15782
CC(Nc1c(C)n(n(c1=O)c1ccccc1)C)C	RAMIFENAZONE	1.1575
OC[C@H]([C@H]([C@@H]([C@@H]([C@H](CC(=O)C(=O)O)O)NC(=O)C)O)O)O	sodium aceneuramate	1.1557
C#Cc1ccc2c(c1)CCC1=C(C(=O)CCN21)C		1.15382
[O-][N+](=O)O[C@@H]1CO[C@H]2[C@@H]1OC[C@@H]2O[N+](=O)[O-]	Isosorbide dinitrate	1.15197
CCCCC([C@@]1(O)CC[C@H]2[C@H](O1)CC(=O)[C@H]2CCCCCCC(=O)O)(F)F	Lubiprostone	1.15182
O=C(CN(c1c(C)cccc1C)C(=O)C1CCS(=O)(=O)CC1)Nc1ccc(cc1)c1nocn1	ASP-2151	1.15167
OC(=O)CCCCCCCn1c2ccccc2c(c1c1cccnc1)C	CGS 12970	1.15077
O=C(c1cc(c(cc1O)Cl)S(=O)(=O)N)Nc1c(C)cccc1C	xipamide	1.15006
COc1c(OC)cc(cc1C(=O)NC[C@@H]1CCCCN1C)S(=O)(=O)NC		1.14792
NC(=O)c1cccc(c1O)Cc1cncn1	MIVAZEROL	1.14613
OC(=O)[C@@H](N[C@H](C(=O)N1CCC[C@H]1C(=O)O)C)CCc1ccccc1	enalaprilat	1.14524
COc1ccsc1CNCC[C@]1(CCOC2(C1)CCCC2)c1ccccn1	TRV-130	1.14508
Clc1c2C[N+](Cc2c(c(c1Cl)Cl)Cl)(C)CC[N+](C)(C)C	Chlorisondamine diiodide	1.1436
OCCc1ccc(cc1)OCCn1cncc1	MR-948	1.14329
Cc1ccc(cc1)C(=O)OCCn1cncc1		1.14261
CC(=CCN1Cc2c(Cl)ccc3c2n(C[C@@H]1C)c(=S)[nH]3)C	TIVIRAPINE	1.14146
CC(C[C@H](N1C(=O)N(C(C1=O)(C)C)Cc1ccc(cc1)NC(=O)Nc1ccccc1C)C(=O)N[C@H](c1ccccc1)CC(=O)O)C	HMR-1031	1.14068
C=CC(NC(=S)NNC(=S)NC(C=C)C)C		1.13997
CCCC[C@H](C(=O)[O-])NC(=O)[C@@H](Cc1cn(c2c1cccc2)C(=O)OC)NC(=O)[C@H](CC(C)(C)C)NC(=O)N1[C@H](C)CCC[C@@H]1C	BQ-788	1.13952
CCCCCCCC/C=C\CCCCCCCC(=O)OC(CO)CO	2-Oleoylglycerol	1.1393
O=C(C1CC1)Nc1nc2n(n1)c(ccc2)c1ccc(cc1)CN1CCS(=O)(=O)CC1	Filgotinib	1.13715
C1CCN(CC1)CCOc1ccc(cc1)C1Oc2ccccc2C=C1c1ccccc1	CDRI 85287	1.13589
NCCCC[C@@H](C(=O)NCC(=O)N(c1ccc(cc1C(=O)c1ccccc1)Cl)C)N	AVIZAFONE	1.13576
Cc1ccc(cc1)S(=O)(=O)[N-]c1on[n+](n1)c1cccc(c1C)Cl	GEA 3175	1.13386
CCOC(=O)C1(CCCN(CC1)C)c1ccccc1	ETHOHEPTAZINE	1.13351
OC(=O)CCC(=O)OCC(=O)[C@@]1(O)CC[C@@H]2[C@]1(C)C[C@H](O)[C@H]1[C@H]2C[C@@H](C2=CC(=O)C=C[C@]12C)C	Methylprednisolone sodium succinate	1.13349
COC1(COc2c(O1)cccc2)C1=NCCN1	Methoxy-idazoxan	1.13329
CCCC[C@@H](C(=O)N[C@H](C(=O)N[C@H](C(=O)NCC(=O)N[C@H](C(=O)N)Cc1ccc(cc1)O)CCCC)CCCC)NC(=O)[C@@H](NC(=O)[C@@H](NC(=O)[C@@H](NC(=O)[C@@H](NC(=O)[C@H](CCCNC(=N)N)N)CCCC)CCCC)CCCC)CCCNC(=N)N	DELMITIDE	1.13291
FCCCNCc1ccc(cc1)c1ccc(cc1F)N1C[C@@H](OC1=O)CNC(=O)C	RX-01-423	1.13168
Clc1cc2NCNS(=O)(=O)c2cc1S(=O)(=O)N.CCOc1nc2c(n1Cc1ccc(cc1)c1ccccc1c1nnn[nH]1)c(ccc2)C(=O)OCOC(=O)OC1CCCCC1	ATACAND PLUS	1.13106
CCOC(=O)N(C1CC1)Cc1ccccc1	ENCYPRATE	1.13035
O=c1c2cccc3c2c(cn1C1CN2CCC1CC2)CCC3	RS-42358-197	1.13023
NC(=N)NCC1COC2(O1)CCCCC2	guanadrel	1.1299
Clc1cccc(c1)N1CCN(CC1)CCn1ccc2c1CCCC2=O	SPI-376	1.12977
CCCCOC(=O)NS(=O)(=O)c1ccc(cc1c1ccc(cc1)Cn1c(CC)nc2c1nc(C)cc2C)CCC	L 162389	1.12861
CCOC(=O)c1ccc(cc1)OCCC1CCN(CC1)c1ccc(nn1)C	Pirodavir	1.12737
COC(=O)c1cc(OC)c2c(c1c1c(cc(c3c1OCO3)OC)C(=O)OC)OCO2	Bifendate	1.12562
Fc1ccc(c(c1)F)C(OP(=O)(O)O)(Cn1cncn1)Cn1cncn1	fosfluconazole	1.12416
Ic1cc(c2c(c1O)nccc2)S(=O)(=O)O	8-HYDROXY-7-IODO-5-QUINOLINESULFONIC ACID	1.12329
n1ccc(cc1)Nc1ccc(cc1)NCCc1c[nH]c2c1cccc2	serdemetan	1.12287
CSCC[C@@H](C(=O)N)NC(=O)[C@@H](NC(=O)[C@@H](Cc1c[nH]c2c1cccc2)NC(=O)[C@@H](N(C(=O)[C@@H](Cc1c[nH]c2c1cccc2)NC(=O)[C@H](CCCNC(=N)N)N)C)Cc1ccccc1)CC(C)C	Antagonist-G	1.12193
CCOP(=O)(OCC)CCCCCCOc1ccc(c(c1)OC)F		1.12051
CC(=O)N(c1ccc(cc1)Nc1cc(C)nc2c1c1[nH]cnc1cc2)C	ACODAZOLE	1.11925
CCCCCCCC/C(=C\CCCCCCCC(=O)O)/[N+](=O)[O-]	CXA-10	1.11925
Fc1cccc(c1)C#Cc1nc(C)cc(c1N)C	ADX-10059	1.11922
CO/N=C(/c1csc(n1)N)\C(=O)NC1C(=O)N2C1SCC(=C2C(=O)O)COC(=O)C	cefotaxime salt	1.11814
CCOC(=O)c1ccc2c(c1)c1cc3c4cc(ccc4[nH]c3c(c1[nH]2)OC)C(=O)OCC	SR-13668	1.1181
CCOP1(=O)N=C(Nc2c1cc(cc2)NS(=O)(=O)C)C1C(=O)N(C(C1=O)C(C)(C)C)CCC(C)(C)C	IDX-375	1.11726
COc1cc(CNS(=O)(=O)c2ccc(cc2)NC(=S)NCc2ccc(cc2)C(F)(F)F)c(cc1O)I	PHE-377	1.11696
[O-][N+](=O)O[C@@H]1CO[C@H]2[C@@H]1OC[C@@H]2O	isosorbide mononitrate, Hassle	1.11686
O=C(Nc1cc(ccc1F)N1CCOC1=O)CCc1ccncc1		1.11684
OCCONC(=O)c1cc2n(C)cnc2c(c1Nc1ccc(cc1Cl)Br)F	selumetinib	1.11614
COc1ccc(c2c1cccc2)NC(=N)Nc1ccc2c3c1cccc3CC2	CNS 1237	1.11508
Oc1cc(O)c2c(c1)oc(cc2=O)c1ccccc1	5,7-Dihydroxyflavone	1.11479
COc1ccc2c(c1)[C@@H]1C[C@@]1(Cn1c2c(C2CCCCC2)c2c1cc(cc2)C(=O)NS(=O)(=O)N(C)C)C(=O)N1C2CCC1CN(C2)C	Beclabuvir	1.11478
O=C1C=C[C@]2(C(=C1)CC[C@@H]1[C@@H]2CC[C@]2([C@H]1CC[C@]2(C)O)C)C	METHANDIE	1.11381
CCCCCCCCC(C(CCCCCCCC(=O)O)O)O	Contracyn	1.11101
Brc1cnc2n(c1)nc(c2)C(=O)N1CCc2c([C@H]1C)cccc2	MRZ-8456	1.11096
ClCSC(=O)[C@@]1(OC(=O)CC)[C@H](C)C[C@@H]2C1(C)C[C@H](O)[C@]1(C2C[C@@H](C2=CC(=O)C=CC12C)F)F	CLOTICASONE PROPIONATE	1.1098
COc1cc2nc(nc(c2cc1OC)N)N1CCN(CC1)C(=O)c1nnc(o1)SC	tiodazosin	1.10947
COc1c(ccc2c1cccc2)C(C(=O)S[C@H](C(=O)NCC(=O)O)C)C	NXTHIO	1.10787
O=C1NC(=O)C(C(=O)N1C)(C)C1=CCCCC1	HEXOBARBITAL	1.10752
O=C(C(c1ccccc1)(c1ccccc1)O)OC1C[N+]2(C)CCC1CC2	Clidinium bromide	1.1071
CCN(C(C=C(c1cccs1)c1cccs1)C)CC	Diethylthiambutene	1.10679
COc1ccc2c(c1)/C(=C/c1c[nH]cn1)/C(=O)N2	SU-9516	1.10678
C[C@@H]1CN(C[C@@H](N1)C)C[C@H](C1(O)CCCCC1)c1cccc(c1)OC(F)(F)F		1.10632
Cc1c(C)c2OC(C)(CCc2c(c1O)C)CN1CCN(CC1)c1cc(nc(n1)N1CCCC1)N1CCCC1	U-78517F	1.10597
O=C1NC(=O)C(S1)Cc1ccc(cc1)OCC1(C)CCCCC1	ciglitazone	1.10304
OC1C(=O)OCC1(C)C	PANTOLACTONE	1.10252
CN1CCN(CC1)CCCN1c2ccccc2Sc2c1cc(cc2)S(=O)(=O)N(C)C	THIOPROPERAZINE	1.10228
CC(Cc1ccc(cc1)C(F)(F)F)N		1.10156
OC[C@H]([C@@H]([C@@H]([C@H](C=O)N)O)O)O	glucosamine sulfate	1.10049
COc1cc(CC(=O)NN(c2c(C)cccc2N2CCCCC2)c2ccc(cc2)Cc2ccccc2)c(cc1C(=O)O)Br	AP-611074	1.10013
COc1nc(c(c(c1Cl)OC)Cl)C(Cl)(Cl)Cl		1.10009
ONC(=O)C1(CCOCC1)NS(=O)(=O)c1ccc(cc1)Oc1ccc(cc1)Cl		1.09948
Cc1ccc2c(c1)C(=O)c1ccccc1CS2		1.09914
COc1cccc(c1)[C@@H]([C@@H](NC(=O)C(F)(F)F)C)Oc1ccc2c(c1)cnn2c1ccc(cc1)F		1.09689
OC[C@@H]1O[C@@H](C(C1O)O)n1cnc2c1nc(OCCc1ccc(cc1)Cl)nc2N	sonedenoson	1.09631
COC(=O)c1ccccc1C(=O)c1ccc(cc1)OCCN1CCCCC1	PITOFE	1.09303
NCCCC[C@@H](C(=O)N[C@H](C(=O)N)Cc1ccccc1)NC(=O)[C@H](Cc1c(C)cc(cc1C)O)NC(=O)[C@@H](CCCNC(=N)N)N	Elamipretide	1.09301
OC(=O)C(Oc1ccc(cc1)Cl)(C)C	moroxybrate	1.09269
CCCCC/C=C\C/C=C\C/C=C\CCCCC(=O)OC[C@@H]([C@H]1OC(=O)C(=C1O)O)O	Ascorbyl gamolenate	1.09175
Oc1ccc(cc1)c1cc(=O)c2c(o1)c(c(cc2O)O)c1cc(ccc1O)c1cc(=O)c2c(o1)cc(cc2O)O	AMENTOFLAVONE	1.09147
Cc1cccc(n1)C(CNC(=O)C1CCN(CC1)C(=O)Cn1c(=O)sc2c1cc(Cl)cc2)O	FR-235208	1.09128
CCN(CCO/N=C(\c1ccc(c(c1Cl)Cl)OC)/c1ccco1)CC	Diclofurime	1.09122
CCc1cccc2c1n(CC1CCCCC1)cc2c1nsc(n1)CN1CCCC1	ORG-51046	1.09052
CN(CCCN1c2ccccc2CCc2c1cccc2)C	Imipramine hydrochloride	1.08943
CC[N+](CCOc1c(OCC[N+](CC)(CC)CC)cccc1OCC[N+](CC)(CC)CC)(CC)CC	Gallamine triethiodide (Flaxedil)	1.08924
COc1cc(CCN(CCCN2CCc3c(C2=O)cc(c(c3)OC)OC)C)ccc1OC	AQ-AH-208-Cl	1.08907
CCCC(=O)O[C@@]1([C@@H](C)C[C@@H]2[C@]1(C)CC(=O)[C@]1([C@H]2CCC2=CC(=O)C=C[C@]12C)F)C(=O)CCl	clobetasone butyrate	1.0882
Fc1ccc(cc1)C(=O)CCCN1CCC(CC1)(O)c1ccc(cc1)Cl	Haloperidol	1.08818
OC(=O)CCC(C(=O)O)NC(=O)c1ccc(cc1)CCc1c[nH]c2c1c(O)nc(n2)N	pemetrexed disodium	1.08797
O=c1sn(c(=O)n1Cc1ccccc1)c1cccc2c1cccc2	Tideglusib	1.08741
OCC1CCCN1C(=O)OC(C)(C)C	H-32786	1.08719
C1CCN(CC1)CCC(c1ccccc1)c1ccccc1	FENPIPRANE	1.08709
COc1ccc2c(c1)nc([nH]2)SCCN1CCOCC1		1.0864
Oc1ccc(cc1C(=O)c1cccs1)C(C)(C)C		1.0862
CCCCCCCCCCCCCCCCCCNC(=O)OC1CCN(CC1)C(=O)OCC(COC(=O)N(C(=O)c1ccccc1OC)Cc1cccc[n+]1CC)OC	MINOPAFANT	1.08558
CCC(C(c1ccc(cc1)O)CC)c1ccc(cc1)O	HEXESTROL	1.0842
CCOc1cc(ccc1OC)[C@H](N1Cc2c(C1=O)c(ccc2)NC(=O)C1CC1)CS(=O)(=O)C	CC-11050	1.08351
CCCCCC(CCCC(=O)[O-])O	M-14157	1.08291
OC[C@@]1(O)C[C@@]23C[C@H]1CCC3[C@]1(C(CC2)c2ccoc2C=C1)C	Kahweol	1.0816
CCCC(=O)OCC(=O)[C@@]1(O)CC[C@@H]2[C@]1(C)C[C@H](O)[C@H]1[C@H]2CCC2=CC(=O)CC[C@]12C	HYDROCORTISONE BUTYRATE	1.08149
CCN(C1CCCCC1)C/C=C\c1cc(Cl)c(c(c1)Cl)C1C2CC3CC1CC(C2)C3	SSR-125329	1.08085
CC(=O)OCC(CCn1cnc2c1nc(N)nc2)COC(=O)C	famciclovir	1.0806
[O-]Cl	SODIUM HYPOCHLORITE SOLUTION	1.07975
Clc1ccc(cc1)COC(c1ccc(cc1Cl)Cl)Cn1cncc1	Econazole nitrate	1.07921
CC(Nc1ncnc(c1)c1csc(n1)N(C(=O)c1ccc(cc1)F)C)C	PF-4802540	1.07907
N#Cc1ccc(nc1)NCCNCC(=O)N1CCC[C@H]1C#N	NVP-728	1.07884
C=CCSc1nnc(s1)c1cc(c(c(c1)C(C)(C)C)O)C(C)(C)C		1.07855
OCC1COC(O1)CI	Domiodol	1.07784
O=c1cc(n(n1c1ccccc1)C)C	Phenazone	1.07783
Fc1cccc(c1)CN(c1ccc(cc1)OCc1ccc2c(c1)cccc2)Cc1ccc(cc1)C(=O)O	analog of ETH-615	1.07772
CNCc1ccc(c(c1)[C@@]1(c2cc(Cl)ccc2N(C1=O)S(=O)(=O)c1ccc(cc1)OC)N1CCC[C@H]1c1ncco1)OC		1.07739
C/C(=N\Nc1ccc(nn1)N1CCOCC1)/CC(=O)OC(C)(C)C	RGH-5526	1.0751
Oc1ccc(nn1)N1CCN(CC1)c1ccccc1		1.07499
O=C1C=C[C@]2(C(=C1)CC[C@@H]1[C@@H]2CC[C@]2([C@H]1CC[C@@H]2OC1=CCCC1)C)C	QUINBOLONE	1.07454
OCC(=O)[C@@]1(O)[C@H](C)CC2C1(C)CC=C1C2CCC2=CC(=O)C=CC12C		1.069
Brc1ccc(c(c1N=C1NCCN1)C)N(C)C	ESR-1150-CL	1.06881
COc1cc(OC)cc(c1)Nc1nc2ccccc2nc1NS(=O)(=O)c1ccc(cc1)NC(=O)c1ccc(c(c1)OC)C	PI3K-IN-1	1.06813
CCCc1cc(=O)[nH]c(=S)[nH]1	Propylthiouracil	1.06787
O=C(N1CCN(C[C@H]1Cc1c[nH]c2c1cccc2)Cc1n[nH]nc1CN1CCOCC1)c1cc(cc(c1)C(F)(F)F)C(F)(F)F	SLV-317	1.0677
OCC(=O)C1(O)CCC2C1(C)CC(O)C1C2CCC2=CC(=O)CCC12C	hydrocortisone, Diurnal	1.0676
CCN(CCC(=O)N1c2ccccc2Sc2c1cc(cc2)C(F)(F)F)CC	FLUACIZINE	1.0675
N[C@H](C(=O)O)CSCC=C	PMK-S005	1.06693
NCCCC[C@@H](C(=O)N1CCC[C@H]1C(=O)N[C@@H](C(=O)N[C@H](C(=O)N[C@@H](C(=O)N[C@H](C(=O)N[C@@H](C(=O)N[C@H](C(=O)N[C@H](C(=O)N)CC(C)C)CC(C)C)Cc1c[nH]c2c1cccc2)Cc1ccccc1)Cc1c[nH]c2c1cccc2)CCC(=O)N)Cc1ccccc1)NC(=O)[C@@H]1CCCN1C(=O)[C@@H](CCCNC(=N)N)N	L-756867	1.06532
CN(CC(C1(O)CCCCC1)c1ccc(cc1)O)C	desmethylvenlafaxine	1.06483
COc1ccccc1OC(=O)c1ccccc1OC(=O)C	guacetisal	1.06481
NCCc1c[nH]c(=S)n1[C@H]1COc2c(C1)cc(cc2F)F	Etamicastat hydrochloride	1.06396
CC(NC(=O)C[C@H]1CCCN(c2c1cccc2)C(=O)c1ccc(cc1Cl)N1CCCC1)C	OPC 51803	1.0629
CN(C(=O)[C@H](N1C(=O)[C@H]([C@H]1/C=C/c1ccccc1)N1C(=O)OC[C@@H]1c1ccccc1)CCC(=O)N1CCC(CC1)N1CCCCC1)Cc1cccc(c1)C(F)(F)F	analog of SRX-251	1.06248
OCC([C@H](C(=O)NCCC(=O)NCCSc1c2SCC(=O)Nc2c2c(c1O)cccc2)O)(C)C	FR 901537	1.06233
OCC(=O)[C@@]1(O)C[C@H](O[C@@H]2C[C@@H](N)[C@@H]([C@H](O2)C)O)c2c(C1)c(O)c1c(c2O)C(=O)c2c(C1=O)cccc2OC	Epirubicin HCl	1.06212
CCC[C@@H]1O[C@H]2[C@](O1)(C(=O)S[C@H]1CCOC1=O)[C@@]1([C@@H](C2)[C@@H]2C[C@H](F)C3=CC(=O)CC[C@@]3([C@]2([C@H](C1)O)F)C)C		1.06154
Fc1cccc(c1)Cn1c(cc2c1cncc2)C(=O)Nc1ccc2c(c1)nc(n2C)C		1.06064
Cc1ccc(c(c1)C)O[C@H]1O[C@H](CCP(=O)(OC(C)C)OC(C)C)[C@H]([C@@H]([C@@H]1O)O)O		1.06037
Oc1cc2CC[C@@H]3[C@@H](c2cc1O)c1ccccc1CN3	Dihydrexidine	1.05908
Fc1ccc(cc1)C(c1ccc(cc1)F)N1CCN(CC1)CCCNc1cc(C)ccc1O	AD 0261	1.05847
CC/C=C\C/C=C\C/C=C\C/C=C\C/C=C\C/C=C\CCC(=O)OCC	omega-3-acid ethyl esters	1.05816
COc1cc(cc(c1OC)OC)[C@H]1[C@H]2C(=O)OC[C@@H]2[C@@H](c2c1cc1OCOc1c2)NC(=O)Cc1ccccc1		1.05686
NCC1(CCN(CC1)c1ncnc2c1c(C)c[nH]2)C(=O)Nc1cccc(c1)OC(=O)N(C)C	LX-7101	1.05569
O=C(C1CCCCCC1)N[C@@H](C(=O)C(=O)N/N=C/1\SC[C@H](N1C)C)C1CCOCC1	ONO 5334	1.05543
O=C(NC1C(=O)N2C1SCC(=C2C(=O)O)CSc1nnc(s1)C)Cc1ccccc1		1.05479
O=C1Nc2c(Cl)ccc(c2C2(N1)CCCCC2)O[C@@H]1C[C@H](C1)C(=O)O	PF-3557156	1.05473
O=CN(CC(C(=O)N[C@@H](C(C)(C)C)C(=O)N1CCN(CC1)Cc1nccs1)CC1CCCC1)O	GBB-200061	1.05354
Clc1ccc2c(c1)nc(c(c2O)c1cccc(c1)Oc1ccccc1)O	L 701324	1.05298
COCc1cccc(c1)C[C@@H](/C=C/[C@H]1[C@H](O)CC(=O)[C@@H]1CCSCCCC(=O)OC)O	ONO 4819	1.05288
CC(=O)OCCN1CCN(CC1)CC/C=C/1\c2ccccc2Sc2c1cc(Cl)cc2	Zuclopenthixol acetate	1.05249
C[C@@H]1CC[C@H]([C@@H](C1)OC(=O)[C@@H]1CCC(=O)N1)C(C)C		1.05167
CC/C=C\C/C=C\C/C=C\C/C=C\C/C=C\C/C=C\CCC(=O)OCCCNC(=O)[C@@H](C(CO)(C)C)O	F-373280	1.04987
COC(=O)[C@@H]1C2=c3c(C1=O)c(/c/1=C/C4=N/C(=C\c5n([Mg]n31)c(/C=C/1\N=C2[C@@H](CCC(=O)OC/C=C(/CCCC(CCCC(CCCC(C)C)C)C)\C)[C@@H]1C)c(c5C(=O)C)C)/[C@@H]([C@H]4CC)C)C		1.04983
NC(=N)NC(=O)c1ccc2c(c1)cccc2c1cnn(c1)C	BIT-225	1.04922
OCc1cc(Cl)c(c(c1)Cl)OCc1ccc(cc1)Cl		1.04916
CCCC(c1ccc(cc1)OCc1ccc(cc1)c1csc(n1)CN(Cc1ncc(s1)C(C)(C)C)CC(=O)O)CCC	JTT-551	1.04903
COc1ccc(cc1)c1[nH]c(nc1c1ccc(cc1)OC)c1ccccc1F		1.04591
CCOC(C(=O)O)Cc1ccc(cc1)OCCN1c2ccccc2Oc2c1cccc2	RAGAGLITAZAR	1.04555
CCN(CCNC1c2ccccc2OCc2c1cccn2)CC	KW 5805	1.04531
OC[C@@H](C(=O)N[C@H](C(=O)NCC(=O)N[C@H](C(=O)N[C@H](C(=O)N1CCC[C@H]1C(=O)NCC(=O)N)CCCNC(=N)N)CC(C)C)Cc1ccc(cc1)O)NC(=O)[C@H](Cc1c[nH]c2c1cccc2)NC(=O)[C@@H](NC(=O)[C@@H]1CCC(=O)N1)Cc1nc[nH]c1	Gonadorelin	1.0449
NC(=O)c1cccc(c1)[C@@H]1C[C@@H]2CC[C@H](C1)N2CCNCC1CCCCC1		1.04476
C#CC1(O)CCC2[C@]1(C)CCC1[C@H]2CCc2c1c(C)cc(c2)O	1-Methyl ethynyl estradiol	1.0438
OC1(OCC[N+](C1)(C)C)c1ccc(cc1)c1ccc(cc1)C1(O)OCC[N+](C1)(C)C	HEMICHOLINIUM BROMIDE	1.04177
Fc1ccc(cc1)c1oc(=O)oc1CCN1CCN(CC1)c1ccccc1	fludoxopone	1.04124
COc1ccc(cc1)N1C(=O)C2(C1c1ccc(cc1)OC)CCCCC2		1.04122
O=C1CP(=O)(O)O[Pt-2]2(O1)[NH2+]C1C([NH2+]2)CCCC1	PADP	1.0395
COCCOc1cc(cc(c1)OCCOC)Cn1c2ccccc2c(c1C(=O)O)c1ccc(cc1)C(C)(C)C	GSK376501	1.03941
CN(C(=O)OCc1ccccc1)C	BGG-492	1.03782
CCOC(=O)Nc1ccc(cc1)SCC1COC(O1)(Cn1cncc1)c1ccc(cc1)OC	ERBULOZOLE	1.03658
OCC(CCc1ccc(n1C)C(=O)CCCc1ccc(cc1)C)(N)C	CS-0777	1.03644
C=CCC(c1ccccc1c1noc2c1cccc2)N	Org-34167	1.0346
Fc1cc(cc(c1CNC1Cc2c(C1)cccc2)F)c1cccc(c1)c1ncn[nH]1	GSK-1521498	1.03412
CO[C@@H]([C@](C(=O)OCC1=CCN2[C@H]1[C@@H](O)CC2)(C(C)C)O)C		1.03393
CC(=O)NC(c1cc(Cl)ccc1C1CCN(CC1)C(=O)[C@@H]1CN(C[C@H]1c1ccc(cc1F)F)C(C)(C)C)C	C-2624	1.03266
Fc1ccc(cc1)CNC(=O)c1nc(N(C(=O)C(=O)C)C)c2c(c1O)nccc2	L-870812	1.03046
O=C(C[N+](CC(=O)Nc1ccccc1)(C)C)Nc1ccccc1	QX 572	1.03007
O=C1N(CCCCN2CCN(CC2)c2ncccn2)C(=O)[C@@H]2[C@H]1[C@H]1CC[C@@H]2C1	tandospirone	1.03005
CC(=O)CCCCn1cnc2c1c(=O)n(C)c(=O)n2C	LOMIFYLLINE	1.03004
C[n+]1cc2c3OCOc3ccc2c2c1c1cc3OCOc3cc1cc2	Sanguinarium chloride	1.02984
OC(COc1cccc2c1cc([nH]2)C)CNC(C)C	mepindolol	1.02982
NCCCC[C@@H](C(=O)N[C@@H]1[C@H](C)SC[C@@H]2NC(=O)[C@H](NC(=O)[C@@H](NC1=O)C)[C@H](C)SC[C@H](NC(=O)[C@@H](NC2=O)Cc1cnc[nH]1)C(=O)N[C@H](C(=O)N[C@H](C(=O)N[C@H](C(=O)N[C@H](C(=O)NC(=C)C(=O)N[C@H](C(=O)O)CCCCN)C(C)C)Cc1cnc[nH]1)[C@H](CC)C)CO)NC(=O)[C@@H](NC(=O)[C@@H](NC(=O)[C@@H]1CS[C@@H](C)[C@H](NC(=O)[C@@H](NC(=O)[C@@H]2CS[C@@H](C)[C@H](NC(=O)[C@@H]3CSC[C@@H](NC(=O)/C(=C/C)/NC(=O)[C@H]([C@H](CC)C)N…	Nisin A	1.02943
CCCC(=O)O[C@H]1CN2CC[C@@H]([C@@H]2[C@H]([C@@H]1O)O)O	Celgosivir	1.02907
COc1ccc(cc1)S(=O)(=O)Nc1cc(ccc1Oc1cc(F)c(cc1Cl)CC(=O)O)C(=O)NC(C)(C)C		1.02794
CN1CCN(CC1)c1cccc2c1oc(=O)[nH]2	Pardoprunox (hydrochloride)	1.02639
COc1cc(cc(c1OC)OC)C(=O)N[C@@H]1OC[C@H](N2[C@H]1CCCC2)c1ccccc1	S-20342-1	1.02577
CN1CCc2c(C1)c1ccccc1n2Cc1ccccc1	MEBHYDROLINE	1.02551
CCCCCN(c1cc(nc2n1ncn2)N1CCCCC1)CCO	AR 12463	1.02525
Cn1cnc2c1ncnc2NC1C[C@H]2C[C@@H]1CC2	N 0861	1.02413
NCCn1c(=O)n(c2c1cc(OC)cc2)C(=O)[C@@H]1C[C@H](C)CC[C@H]1C(C)C	D-3263	1.02267
COc1ccc(cc1)CCN1CCC[C@@H]1CN1c2ccccc2OCc2c1cccc2	AJG-049	1.022
CCCC12CCC(CC1)(CC2)C(=O)O		1.0218
CC(=O)OCC(=O)[C@@]1(O)[C@H](C)CC2[C@]1(C)CC=C1[C@H]2CCC2=CC(=O)C=C[C@]12C	VBP-15	1.02073
CSCC[C@@H](C(=O)O)NC(=O)C(Cc1ccccc1C)CS	Sch-42354	1.01987
CCS(=O)(=O)n1c2CCN(Cc2c2c1ccc(c2)C(=O)N1CCC(CC1)C)C1CCOCC1	AZ-599	1.01939
COc1ccc(cc1)C(=O)/C(=C(/c1ccc2c(c1)OCO2)\C(=O)[O-])/Cc1ccccc1	PD 155080	1.01891
Fc1ccc(cc1)c1cncc(c1)CNCC1CCc2c(O1)cccc2	SARIZOTAN	1.0188
O=Cc1c(cccc1O)OCc1cccnc1c1ccnn1C(C)C	GTx-011	1.01854
CCCCC/C=C\C/C=C\C/C=C\C/C=C\CCCC(=O)NCc1ccc(c(c1)OC)O	Arvanil	1.01784
Cn1c2[nH]c(nc2c(=O)n(c1=O)C)CN1CCN(CC1)C(c1ccccc1)c1ccccc1		1.0167
N=C(Nc1c(Cl)cccc1Cl)NC(=O)N	Biclodil	1.01625
O/N=C(/c1ccc(c(c1)O)O)\N	amidox	1.01606
CN(CCSc1ccc(s1)/C=c/1\[nH]c(=O)/c(=C/c2ccccc2)/[nH]c1=O)C	XR 5118	1.01602
CN1C[C@@H]2C[C@H]1CN2c1cc2c(cc1F)c(=O)c(cn2C1CC1)C(=O)O	Danofloxacin mesylate	1.01595
CCOc1cc(CNc2cnnc(c2Cl)O)ccc1OC	NIP 502	1.01594
CC[Hg]Sc1ccccc1C(=O)[O-]	THIMEROSOL	1.01528
N#CC[C@@H]1CC[C@@H](CO1)n1c(nc2c1c1sccc1nc2)[C@H](O)C	INCB-052793	1.01352
NCC[C@@H](C(=O)N[C@@H]1C[C@H](N)[C@H]([C@@H]([C@H]1O[C@H]1O[C@H](CO)[C@H]([C@@H]([C@H]1O)N)O)O)O[C@H]1O[C@H](CN)[C@H]([C@@H]([C@H]1O)O)O)O	Amikacin	1.01253
NCCCC[C@@H](C(=O)N)NC(=O)[C@@H](Cc1ccccc1)NC(=O)[C@H](Cc1c[nH]c2c1cccc2)NC(=O)[C@@H](NC(=O)[C@@H](Cc1ccc2c(c1)cccc2)NC(=O)[C@H](N)C)C	Pralmorelin	1.0123
CSCc1cnc(c(c1CNCC)O)C	EMD-21657	1.0118
CCCCCCCCCC[N+](CCCCCCCCCC)(C)C	Hoe-S-2922	1.01139
OCCOCCOC(=O)c1ccccc1Nc1cccc(c1)C(F)(F)F	etofenamate	1.01076
Cc1ccc(c(c1)C)Oc1ccccc1c1csc(n1)N=C1NCCCN1	Abafungin	1.00941
O=C(Nc1cccc(c1)c1cocc1)COCC(=O)Nc1ccc(cc1C(=O)O)Cl	TM-5441	1.0092
O=C(Cc1ccc(cc1)O)Nc1ccc2c(c1)n(CCN1CCCC1)nc2		1.00914
COc1cc(OC)cc(c1)Nc1nc2ccccc2nc1NS(=O)(=O)c1cccc(c1)NC(=O)c1ccc(c(c1)OC)C	analog of pilaralisib	1.00861
FCCC1CCN(CC1)C(=O)[C@@H](NS(=O)(=O)c1cnccc1N[C@@H](Cc1ccccc1)CO)Cc1ccc(cc1)N	CGH-1668	1.00701
COc1ccc(cc1)C[C@@H]1NC(=O)CC2(CCCCC2)SSC[C@H](NC(=O)[C@@H](NC(=O)[C@@H](NC(=O)[C@@H](NC1=O)Cc1ccccc1)CCC(=O)N)CC(=O)N)C(=O)N1CCC[C@H]1C(=O)N[C@H](C(=O)NCC(=O)N)CCCNC(=N)N	Manning Compound	1.00603
NCCCC[C@@H](C(=O)NCC(=O)N)NC(=O)[C@@H]1CCCN1C(=O)[C@@H]1CSSC[C@H](N)C(=O)N[C@@H](Cc2ccccc2)C(=O)N[C@H](C(=O)N[C@H](C(=O)N[C@H](C(=O)N1)CC(=O)N)CCC(=O)N)Cc1ccccc1	Felypressin	1.00508
CCCCC1(CCCC)CS(=O)(=O)c2c([C@H]([C@H]1O)c1ccc(cc1)OCc1ccc(cc1)C[N+]13CCN(CC1)CC3)cc(cc2)N(C)C	Lopixibat chloride	1.00472
OCC(NCC(c1cc(O)cc(c1)O)O)(C)C	KWD-2131	1.00367
COc1c2c(=O)cc(oc2c(c2c1cco2)OC)C	Khellin	1.00314
COc1cc2nc(nc(c2cc1OC)N)N1CCN(CC1)C(=O)C1CC2CCC1C=C2	SM-2470	1.00271
F[Ga](F)F	Gallium Fluoride	1.0022
CN(CCN(c1ccccn1)Cc1cccs1)C	METHAPYRILENE	1.0008
CC1c2ccccc2CCN1c1ssc(=O)c1Cl	RP 54745	0.999301
OC(=O)CN(c1ccccc1OCCOc1ccccc1N(CC(=O)O)CC(=O)O)CC(=O)O	BAPTA (DP-b99 metabolite)	0.999113
CC[C@H]1[C@@H](COc2nccc3c2cc(OC)c(c3)C(=O)N)NC(=O)[C@H]1F	PF06650833	0.998151
CN(c1ccccc1)/N=N/N(c1ccccc1)C	SIMTRAZENE	0.996863
CN(CCNC(=O)C(NC(=O)c1cc2CCCCCCc2n(c1=O)CC1CCCCC1)(C)C)C		0.99538
O=C(N(O)C)CCc1ccc2c(c1)Cc1ccccc1CO2	P 10294	0.995156
Oc1cc(O)c2c(c1)oc(c(c2=O)O[C@@H]1O[C@H](CO[C@@H]2O[C@@H](C)[C@@H]([C@H]([C@H]2O)O)O)[C@H]([C@@H]([C@H]1O)O)O)c1ccc(c(c1)O)O	Rutin	0.992997
NCc1scc(n1)c1cc(c(c(c1)C(C)(C)C)O)C(C)(C)C	BN-82451	0.992272
CC[C@@H](C(=O)N1C[C@H](C[C@H]1Cc1c([nH]c2c1ccc(c2)F)c1[nH]c2c(c1C[C@@H]1C[C@@H](CN1C(=O)[C@@H](NC(=O)[C@@H](NC)C)CC)O)ccc(c2)F)O)NC(=O)[C@@H](NC)C	Birinapant	0.990964
C[C@@H](c1ccccc1)Nc1cc(=O)n(c(=O)[nH]1)C(C)C	Mavacamten	0.990897
C#CC1(CCCCC1)OCC(CN1CCN(CC1)c1ccccc1OC)O	MOCIPRAZINE	0.989449
OC(=O)Cc1ccc2c(c1)OCc1c(C2=O)cccc1	OXEPINAC	0.988145
CCn1cc(C(=O)O)c(=O)c2c1nc(nc2)N1CCNCC1	pipemidic acid	0.987222
COc1ccccc1OC(=O)C(c1ccc(cc1)CC(C)C)C	methoxybutropate	0.986756
COc1cncnc1N1CCN(CC1)CCCc1c[nH]c2c1cc(cc2)CS(=O)(=O)NC	AVITRIPTAN	0.986392
OC[C@@H]1O[C@@H]([C@@H]([C@H]1O)F)n1cc(C)c(=O)[nH]c1=O	CLEVUDINE	0.986133
ClCC1CO1.C=CCNCCCCCC[N+](C)(C)C.CCCCCCCCCCNCC=C.NCC=C	colesevelam hydrochloride	0.98542
CCCCCCCCCCCCCCCCCCCCCCCCC(=O)O	SC-101c	0.984806
O=C(/C=C/c1cccnc1)NCCCCC1CCN(CC1)C(=O)c1ccccc1	Daporinad	0.984618
CCCCCCC(=O)O[C@H]1CC[C@@H]2[C@]1(C)CC[C@H]1[C@H]2CCC2=CC(=O)CC[C@]12C	Testosterone enanthate	0.984306
OC(=O)CCCC/C=c/1\c2ccccc2n(c(=O)c2c1cncc2)C	KF 13218	0.983032
O=C1NC(=O)N(C1)S(=O)(=O)c1oc2c(c1Br)cccc2	M-16209	0.981847
OCC1OC(C(C1O)O)n1cnc2c1nc[nH]c2=O	INOSINE	0.980282
Fc1ccc2c(c1)[C@H](OCc1c(F)cccc1F)[C@H](S2)Cn1ccnc1	Sch-35852	0.98017
COCCNCCc1cccc(c1)Nc1ncc2c(n1)c1ccccc1[C@H](C2)c1ccccc1F	ARQ-087	0.97991
O=C1C(c2ccc(cc2)Br)C(=O)c2c1cccc2	BROMIDIONE	0.976853
NCCCCCCNS(=O)(=O)c1cccc2c1cccc2Cl	W-7	0.976641
CCCCCC(OC(=O)c1cccnc1)/C=C/n1cncc1	nicogrelate	0.976325
Oc1ccc(cc1)C1C(COc2c1ccc(c2)O)c1cccc(c1)O	NV-143	0.975675
CC(n1nc(c2cccc(c2Cl)Cl)c(=N)[nH]c1=N)C	Palatrigine	0.975628
CCOC(=O)c1cnc2c(c1O)cc(c(c2)OCC(C)C)OCC(C)C	Buquinolate	0.973993
CO/N=C(\C(=O)N[C@@H]1C(=O)N2[C@@H]1SCC(=C2C(=O)O)CSc1cnns1)/c1csc(n1)N	Cefuzonam	0.973683
CCCCN1CCC(CC1)COC(=O)c1cc(Cl)c(c2c1OCCO2)N	SB-204070	0.973666
CCc1nc2ccc(cc2c(=O)n1Cc1ccc(cc1F)c1ccccc1S(=O)(=O)NC(=O)OCCC1CC1)NC(=O)N(C(C)C)C	L 163579	0.973406
Cn1ncc(c1)CCN1CCN(CC1)c1ccccc1Cl	ENPIPRAZOLE	0.972986
Cc1onc(c1)NS(=O)(=O)c1ccc(cc1)/N=C/c1ccccc1O		0.972452
OC[C@@]1(O)C[C@H]2O[C@]1(C)n1c3c4n2c2ccccc2c4c2c(c3c3c1cccc3)CNC2=O	lestaurtinib	0.972094
CCCCCCCCCN1C[C@H](O)[C@H]([C@@H]([C@H]1CO)O)O	NN-DNJ	0.970228
OC(=O)CCNC(=O)c1ccc(cc1)N=Nc1ccc(c(c1)C(=O)O)O	balsalazide disodium	0.970058
COc1cc(cc(c1OC)OC)N(C(=O)N)CCN(C)C	YM-46A	0.968599
NS(=O)(=O)Cc1noc2c1cccc2	zonisamide	0.96838
Clc1ccc(c(c1)Cl)c1cccc2c1nc(C)cc2N1CCC(=CC1)C(=O)N	CRA-0450	0.966833
NC(=O)NNc1ccccc1	PHENICARBAZIDE	0.965861
CC(OCCn1c(=S)[nH]c(=O)c2c1cc[nH]2)C	AZD-3241	0.965392
CN(C(c1cscc1)C(=O)Nc1ccc2c(c1)cc[nH]c2=O)C	Verosudil	0.964329
N#C/C(=C(\CCC#C)/O)/C(=O)Nc1ccc(cc1)C(F)(F)F	MANITIMUS	0.964203
COc1cc(CCNCC(COc2cccc(c2)C)O)ccc1OC	bevantolol	0.963529
O=C1C=C[C@]2(C(=C1)[C@@H](C)C[C@@H]1[C@]2(F)[C@@H](O)C[C@]2([C@H]1CC[C@]2(O)C(=O)C)C)C	fluorometholone, Allergan	0.963376
O=C([C@H]1CCCN([C@H]1c1ccc(cc1)NC1CCCC1)C(=O)c1c(C)cccc1F)Nc1ccc(c(c1)C(F)(F)F)C	CCX-168	0.962289
Clc1ccc(cc1c1cc(C)c2c(c1)nnc(n2)Nc1ccc(cc1)OCCN1CCCC1)OC(=O)c1ccccc1	TG-100801	0.96125
NC(=O)c1cc(cc(c1)[N+](=O)[O-])[N+](=O)[O-]	Nitromide	0.961212
Nc1ccc(cc1)S(=O)(=O)Nc1nccc(n1)C	SULFAMERAZINE	0.960677
CN(CC/C=C\1/c2ccccc2OCc2c1cccc2)C	cidoxepin	0.959951
CN(C(CSc1nc2ccccc2cc1c1ccccc1)(C)C)C	ICI-170809	0.959221
C[N+]1(CCOCC1)CCC(c1cccs1)(c1ccccc1)O	tiemonium metilsulfate	0.958571
CC[C@@H]([C@@H](C(=O)N[C@H](C(=O)N[C@H](C(=O)O)Cc1cnc2c1cccc2)CCC(=O)O)N)C	Neogen	0.957289
CCCCC([C@@H](/C=C/[C@H]1C=CC(=O)[C@@H]1C/C=C\CCCC(=O)O)O)(C)C		0.956806
N#Cc1ccc(cc1)C(n1cncn1)(c1ccc(cc1)C#N)F	CGS-47645	0.956439
[O-]N=O	Sodium Nitrite	0.954349
C=CCC1(C(=O)NC(=O)NC1=O)C1CCC=C1	CYCLOPENTOBARBITAL	0.953426
OCc1cc(ccc1O)C(CNCCCCCCOCCCCc1cccc(c1)S(=O)(=O)N)O	GW597901X	0.95333
CNCCCC1(OC(c2c1cccc2)(C)C)c1ccccc1	talopram	0.953047
O=C(Cc1ccc(cc1)c1ccccc1)NCCN1CCCCC1		0.952569
ClC(c1nc2c(c(c1C(=O)Nc1nccs1)O)cccc2C(F)(F)F)Cl	RU-29693	0.952541
OC[C@H]1OC(Oc2cc(O)cc(c2C(=O)CCc2ccc(cc2)O)O)[C@@H]([C@H]([C@@H]1O)O)O	Phlorizin	0.951762
O=C(N[C@H](C(=O)Nc1c(Br)cc(cc1CN(C1CCCCC1)C)Br)CSSC[C@@H](C(=O)Nc1c(Br)cc(cc1CN(C1CCCCC1)C)Br)NC(=O)OCc1ccccc1)OCc1ccccc1	Cistinexine	0.951304
C[C@@H]1C/C=C/C=C/C=C/C=C/[C@H](O[C@@H]2O[C@H](C)[C@H]([C@@H]([C@@H]2O)N)O)C[C@@H]2O[C@@](C[C@H](C[C@@H]3[C@@H](/C=C/C(=O)O1)O3)O)(O)C[C@@H]([C@H]2C(=O)O)O	Natamycin	0.951017
CCN1CCCC1CNC(=O)c1cc(ccc1OC)S(=O)(=O)CC	itanoxone	0.950643
COCCCN1C[C@H](NCC)c2c(S1(=O)=O)sc(c2)S(=O)(=O)N	brinzolamide	0.950637
CC(=O)Nc1ccc(cc1)OCCOC(=O)c1ccccc1OC(=O)C	ETERSALATE	0.950501
CC(=CCc1c2O[C@]34[C@@]5(C/C=C(\C(=O)O)/C)OC([C@@H]4C[C@H](C5=O)C=C3C(=O)c2c(c2c1O[C@](C)(CCC=C(C)C)C=C2)O)(C)C)C	Gambogic acid	0.950133
O=C(C(c1ccc(cc1)O)N)NC1C(=O)N2C1SCC(=C2C(=O)O)C	cefadroxil	0.949332
O=C1NC(=O)[C@H]([C@@H]1c1c[nH]c2c1cccc2)c1cn2c3c1cccc3CCC2	tivantinib	0.949214
COc1ccc(cc1OC1CCCC1)N(c1cccc(c1)C(=O)O)Cc1cccnc1	MEM1414	0.948488
CCCCN(CCCC)CCCOC(=O)c1ccc(cc1)N	BUTACAINE	0.948344
NC(=O)c1c(O)nc[nH]1	SM-108	0.948019
CC(c1ccccc1OCC1=NCCN1)C	FENOXAZOLINE	0.947462
O=C1NC(=O)NC1(c1ccccc1)c1ccccc1	phenytoin sodium	0.947244
CCOc1cnccc1c1[nH]c(=O)c2c(n1)n(nc2CC)C1CCCC1	WIN 65579	0.946455
CC(=CCOc1cc(ccc1Cl)NC(=O)c1cscc1)C		0.945944
NC(Cc1ccccc1)COC(=O)N	R-228060	0.945558
CCC[C@H]1CN([C@@H](C1)C(=O)N[C@@H]([C@H]1O[C@H](SC)[C@@H]([C@H]([C@H]1O)O)O)[C@@H](Cl)C)C	Clindamycin hydrochloride	0.945346
OC(=O)CCNC(=O)[C@@H](NC(C(=O)OCC1COC(O1)(C)C)Cc1ccccc1)Cc1ccccc1	Sch-34826	0.944493
COc1cc(ccc1OC)Cc1nc(=O)c2n([nH]1)c(nc2C)[C@H]([C@H](O)C)CCCc1ccccc1	BAY-60-7550	0.944199
OCCCNC(=O)[C@@H](C(CO)(C)C)O	dexpanthenol	0.943539
CCCCCCCCCCCCCCOc1ccc(o1)C(=O)C	RMI-15731	0.942793
OC(=O)CCC(Sc1ccc(cc1)C(=O)O)/C=C\Cc1ccc(cc1)OCCCCOc1ccccc1	Bay-x-7195	0.942159
CC(=O)Nc1cc(ccc1O)[As](=O)(O)O	ACETARSONE	0.941435
CC(C(=O)O)CC(=O)c1ccc(cc1)c1ccccc1	metbufen	0.941424
COc1cc2CCN([C@@H]3c2cc1Oc1cc(ccc1O)C[C@@H]1c2c(CC[N+]1(C)C)cc(c(c2Oc1ccc(C3)cc1)O)OC)C	TUBOCURARINE CHLORIDE	0.941231
OC(=O)[C@H](Cc1cc(Cl)c(c(c1)Cl)OCc1cc(N)cc2c1oc(n2)c1ccccc1)N	KYT-0353_:_ JPH203 free base	0.941199
CNCc1ccc(o1)CSCCN/C(=N/S(=O)(=O)C)/NCC(c1ccc(cc1)O)O	OSUTIDINE	0.941175
Clc1ccccc1CNc1ccc(nn1)n1cncc1	MFT 279	0.940286
CCC(=O)c1cc(cc(c1O)CN)C(C)(C)C	ONO 3144	0.939947
CCN1CCN([C@@H]2[C@@H]1c1c(C)c3c(n1CC2)cccc3)C(C)C	atiprosin	0.938967
OC(=O)CC1Cc2c(O1)c(C)c(c(c2C)OC(=O)C)C	raxofelast	0.938719
CN(CCn1cc(c2c1cc(Cl)cc2)C(=O)N1CCC2(CC1)OCc1c2cccc1)C	RO5028442	0.938571
OC(=O)CCNC(=O)C1CCCN(C1)C(=O)CCC1CCNCC1	RWJ 50042	0.937306
O=C1C=C[C@]2(C(=C1)CC[C@@H]1[C@]2(F)[C@@H](O)C[C@]2([C@H]1C[C@H]([C@]2(OC(=O)C1CC1)C(=O)COC(=O)C1CCCCC1)C)C)C	NS-126	0.937202
COc1ccc(cc1)OCC(CNC(C)C)O		0.936484
CCN(CCOc1cccc(c1)O)CC		0.936354
COC(=O)N(c1c(N)nc(nc1N)c1nn(c2c1cccn2)Cc1ccccc1F)C	riociguat	0.935555
CC(C[C@@H](C(=O)N1CCC[C@H]1C(=O)N[C@H](C(=O)N[C@H](C(=O)N[C@H](C(=O)N)CC(=O)O)Cc1ccccc1)Cc1ccc(cc1)O)N)C	LPYFDa	0.9349
O=C1OCC(=C1)C1C(O)CC2(C1(C)CC[C@H]1[C@H]2CCC2C1(C)CCC(C2)OC1CC(O)C(C(O1)C)OC1CC(O)C(C(O1)C)OC1CC(O)C(C(O1)C)O)O	GITOXIN	0.934246
OC(=O)C(Oc1cccc(c1C)C(=O)c1ccc(cc1)Cl)C	LOSMIPROFEN	0.933491
OC[C@H]1O[C@H]([C@@H]([C@@H]1O)O)n1c(Br)nc2c1cc(Cl)c(c2)Cl	BDCRB	0.932442
CN(CC(=O)Nc1ccc2c(c1)c1ccccc1c(=O)[nH]2)C	Parsepril	0.931818
Fc1ccc(cc1)c1cc(ccc1C(N)C)C(=O)Nc1ccncc1	AMA-0076	0.93162
O=c1ccc2c(o1)c1c(C)coc1cc2		0.930354
O=C(COc1nn(c2c1cccc2)Cc1ccccc1)OCC(=O)[C@@]1(O)CC[C@@H]2[C@]1(C)C[C@H](O)[C@H]1[C@H]2CCC2=CC(=O)CC[C@]12C	BENDACORT	0.930292
C/C(=C\CCC(=O)OC/C=C(/CCC=C(C)C)\C)/CC/C=C(/CCC=C(C)C)\C	GEFARNATE	0.929794
ONC(=O)C(c1ccc(cc1)CC(C)C)C	Ibuproxam	0.929331
Oc1ccc(cc1)CC(C(=O)NC(C(=O)O)Cc1ccc(cc1)O)NC(=O)C(Cc1ccc(cc1)O)N		0.928862
O[Hg]CC(CNC(=O)c1ccccc1OCC(=O)O)OC	MERSALYL SODIUM	0.92806
COCCCCCCCCCN1C[C@H](O)[C@H]([C@@H]([C@H]1CO)O)O	UV-4B	0.927357
CCCC[C@@H](C(=O)N[C@H](C(=O)N[C@H](C(=O)N[C@@H](C(=O)N[C@H](C(=O)N[C@H](C(=O)NCC(=O)N[C@H](C(=O)N1CCC[C@H]1C(=O)N[C@H](C(=O)N)C(C)C)CCCCN)Cc1c[nH]c2c1cccc2)CCCNC(=N)N)Cc1ccccc1)Cc1[nH]cnc1)CCC(=O)O)NC(=O)[C@@H](NC(=O)[C@@H](NC(=O)[C@@H](NC(=O)C)CO)Cc1ccc(cc1)O)CO	Melanotan I	0.926473
CC(N(C(C)C)CC[C@@]1(C(=O)N=C(N2[C@@H]1CCCC2)C)c1ccccc1)C	Actisomide	0.926153
NCC(=O)CCC(=O)OCc1ccccc1	Aminolevulinic acid benzyl ester	0.925797
OCc1ccc(cc1O)[C@@H](C(=O)O)N	Forfenimex	0.925713
COc1cc(ccc1NC(=O)Nc1ccccc1C)CC(=O)N[C@H](c1noc(c1)CCC(=O)O)CC(C)C	CP-664511	0.925567
Cc1ccc(o1)Cn1c(NC2CCNCC2)nc2c1nccc2	NOBERASTINE	0.925381
O=C(Nc1cccc(c1)[C@@H](C(=O)O)C)NCC(=O)N1[C@@H](CS[C@@H]1c1ccccc1F)C(=O)OC(C)(C)C	PH-CBR-2016-001-HVAC-11807-0	0.92527
CCCCCCCCCCCC(=O)c1ccc(cc1)OCC[N+](Cc1ccccc1)(C)C	LAURALKONIUM CHLORIDE	0.925034
OC[C@H]1O[C@H]([C@@H]([C@@H]1O)O)n1cnc2c1nc(I)nc2N		0.924863
Oc1ccc(cc1)[C@@H]1COc2c([C@H]1O)ccc(c2)O	TRANS-NV-04	0.924693
COc1cc2c(ncnc2cc1OCCCN1CCN(CC1)C)Nc1ccc2c(c1)sc(n2)NC(=O)Nc1cc(C)ccc1OC	4SC-203	0.923655
NC(=S)N/N=C/c1ncccc1N	PAN-811	0.923417
Oc1nc2c(o1)c(ccc2)N1CCN(CC1)Cc1cccc(c1)c1ccccc1	Bifeprunox mesilate	0.922952
O=C(N1CCCCC1CN1CCCC1)Cc1ccc(cc1)C(F)(F)F	BRL-52656	0.922943
O=C(/C=C/c1ccc(cc1)N)NC[C@H]1OC(=O)N(C1)c1ccc(c(c1)F)N1CCOCC1		0.922856
Fc1ccc2c(c1)COB2O	Tavaborole	0.922024
n1nnc([nH]1)c1n[nH]c2c1CCC2	MK-0354	0.921492
O=C(c1ccc(cc1)O[C@@H]1C[C@H](C1)N1CCCCC1)N1CCOCC1	analog of UCB-2892	0.921363
CCN1CCN(C(=O)C1=O)C(=O)N[C@H](c1ccc(cc1)O)C(=O)N[C@@H]1C(=O)N2[C@@H]1SCC(=C2C(=O)O)CSc1nnnn1C	cefoperazone	0.921283
CCCCCCC(COC(=O)c1cccnc1)(COC(=O)c1cccnc1)COC(=O)c1cccnc1	HEPRONICATE	0.919265
CC(C(=O)N)C	Isobutyramide	0.918646
CC(CC(C)(C)C)CC(CC(=O)O)N		0.918427
CC(Cn1c(=O)cc(c2c1cccc2)C(=O)O[C@@H]1C[C@H]2CC[C@@H](C1)N2C)C		0.917294
NC1=NCC(O1)c1ccc(cc1)Br		0.917238
[O-][n+]1cccc(c1)C(=O)Oc1ccc(cc1C(C)(C)C)C1CCCCC1	L44-O	0.916332
CN1[C@@H]2CC[C@H]1C[C@H](C2)NC(=O)c1cnc2c(c1O)cccc2	KF-20170	0.916164
O=C(N1CC(=O)N2C(C1)c1ccccc1CCC2)C1CCCCC1	Epsiprantel	0.915514
OCC(C(=O)Nc1ccc(cc1)NS(=O)(=O)c1cccc2c1cccc2N(C)C)(C)C	Tomeglovir	0.913645
CC1=C(C(=O)OCCN(c2ccccc2)Cc2ccccc2)C(C(=C(N1)C)P1(=O)OCC(CO1)(C)C)c1cccc(c1)[N+](=O)[O-]	efonidipine	0.912904
Cc1ccc(cc1)S(=O)(=O)NC(=O)N1CCC(CC1)N1CCC(CC1)Oc1ccc(c(c1)Cl)Cl	AZD-3778	0.912833
CCCCCOc1ccc(cc1)c1ccc(cc1)c1ccc(cc1)C(=O)N[C@H]1C[C@@H](O)[C@@H](O)NC(=O)[C@@H]2[C@@H](O)[C@H](CN2C(=O)[C@@H](NC(=O)[C@@H](NC(=O)[C@H]2N(C(=O)[C@@H](NC1=O)[C@H](O)C)C[C@@H](C2)O)[C@@H]([C@H](c1ccc(cc1)O)O)O)[C@H](O)C)C	anidulafungin	0.91278
O=NSC(CC(=O)Oc1cc(C(C)C)c(cc1C)OCCN(C)C)(C)C	NMI 221	0.912434
CCCCc1nc(c(n1Cc1ccc(cc1)c1ccccc1c1n[nH]nn1)C(=O)O)Cl	Carboxylosartan	0.912322
NCCCC[C@@H]1NC(=O)[C@H](NC(=O)[C@H](Cc2ccc(cc2)O)NC(=O)[C@@H](CSSC[C@@H](NC(=O)[C@@H](NC1=O)CC)C(=O)N[C@H](C(=O)N)[C@H](O)C)NC(=O)[C@@H](Cc1ccccc1)NC(=O)CN1CCN(CC1)CCO)Cc1cnc2c1cccc2	BIM-23190	0.910864
ONC(=O)Cc1c(C)n(c2c1cc(OC)cc2)C(=O)c1ccc(cc1)Cl	oxametacin	0.910675
COc1ccccc1N1CCN(CC1)CCCCNC(=O)c1ccc2c(c1)cccc2	BP4.897	0.910494
OC(=O)CO/N=C(/c1csc(n1)N)\C(=O)N[C@@H]1C(=O)N(C1(C)C)OS(=O)(=O)O	TIGEMONAM	0.910441
CCCCCCN1CCC(CC1)(c1ccccc1)C(=O)N(CC)C	SAMERIDINE	0.910371
CC(C(F)(F)F)Oc1ccc2c(c1)Oc1c(S2(=O)=O)cccc1	2614W94	0.90984
CCN1CCOC2C1Cc1c(OC)ccc(c1C2)SC		0.909694
COc1ccc(cc1)S(=O)(=O)Nc1cccc2c1Nc1ccc(cc1CN2)F	ER 34410	0.908894
COc1ccc(cc1)[C@@H]1Sc2cc(Cl)ccc2N(C(=O)[C@@H]1OC(=O)C)CCCN1CCN(CC1)c1ccccc1OC	S 2150	0.907929
O=C1O[C@@H](C(=C1O)O)[C@@H]1COC(O1)c1ccccc1	zilascorb	0.907659
Cl[I](Cl)Cl	Iodine trichloride	0.905964
N#Cc1cccc(c1)c1nc(sc1n1ccnc1C)Nc1cnccn1	QAF-805	0.90557
Nc1ncnc(n1)Nc1ccccc1	AMANOZINE	0.905148
NC(=O)Nc1cc(sc1C(=O)N[C@H]1CCCNC1)c1cccc(c1)F	AZD-7762	0.904944
CC(=O)O[C@H]1C[C@@H]2CC[C@@H]3[C@@H]([C@]2(C[C@@H]1N1CCCCC1)C)CC[C@]1([C@H]3C[C@@H]([C@@H]1OC(=O)C)[N+]1(C)CCCCC1)C	vecuronium bromide	0.903308
COc1cc(S(=O)C)c(cc1OC)C	Tolmesoxide	0.903072
CNC(=O)c1ccc(nc1)Oc1ccc2c(c1)CCN(CC2)C1CCC1	GSK 189254	0.902752
COc1[nH]c2c(c1C(=O)OCC1CCN(CC1)CCNS(=O)(=O)C)cc(cc2)F	GR 125487	0.901425
Fc1ccc2c(c1)c1ccc3c(c1C(O2)c1cccc(c1)Cl)C(=CC(N3)(C)C)C	(S)-LG-120746	0.901008
Clc1ccc(cc1)OCC1=NCCc2c1cccc2	FAMOTINE	0.900955
Cl[Mn]Cl	Manganese chloride	0.899764
CC(=O)OCC(=O)[C@@]12OC3(O[C@@H]1C[C@@H]1[C@]2(C)C[C@H](O)[C@]2([C@H]1CCC1=CC(=O)C=C[C@]21C)F)CCCC3	amcinonide	0.89888
CC(=O)N[C@@H](C(=O)N[C@@H](C(=O)N[C@@H](C(=O)N)Cc1ccccc1)CCCNC(=N)N)Cc1ccc(cc1)O	mDTP-3	0.8982
O=C(C(c1cccc(c1)C(=O)c1ccccc1)C)Nc1nccc(c1)C	piketoprofen	0.895736
[truncated: 10,659 more rows]

## Sheet: 10 uM screen
10 µM ReFRAME screen hits
Compound SMILES	Compound Name	Z score
NCCCC(=O)N1CCCC2(C1)Cc1ccccc1CN2C(=O)C		98.966
NC(=O)NCCCC(=O)N1Cc2ccccc2OC2(C1)CCN(CC2)C(=O)C		76.9887
ONC(=O)c1cnc(nc1)N1C[C@@H]2[C@H](C1)[C@H]2NCc1ccc2c(n1)ccc(c2)F	CHR-3996	67.7853
ONC(=O)c1cnc(nc1)N1CCN(CC1)S(=O)(=O)c1ccc2c(c1)cccc2	JNJ-16241199	66.8188
NCC(=O)N1CCCC2(C1)Cc1ccccc1CN2C(=O)Cc1ccc(cc1)OC		54.3538
O=C(c1ccc(cc1)CNc1nccc(n1)c1cccnc1)Nc1ccccc1N	Mocetinostat (MGCD0103)	49.7363
OCCN(Cc1ccc(cc1)/C=C/C(=O)NO)CCc1c[nH]c2c1cccc2	LAQ824 (NVP-LAQ824, Dacinostat)	41.4607
ONC(=O)CCCCCCOc1cc2c(ncnc2cc1OC)Nc1cccc(c1)C#C	CUDC-101	40.2234
ONC(=O)c1cnc(nc1)N1CCC(CC1)CNCc1cn(c2c1cccc2)C	Quisinostat	39.8037
ONC(=O)/C=C/c1ccc(cc1)CNCCc1c(C)[nH]c2c1cccc2	Panobinostat	39.5778
COC(=O)C1c2cc3c(c(c2C(CC1(O)CC)OC1OC(C)C(C(C1)N(C)C)OC1CC(O)C(C(O1)C)OC1CCC(=O)C(O1)C)O)C(=O)c1c(C3=O)cccc1O	aclarubicin	38.971
ONC(=O)c1ccc(cc1)OCCNC(=O)c1oc2c(c1CN(C)C)cccc2	PCI-24781	38.2955
ONC(=O)CCCCCCC(=O)Nc1ccccc1	Vorinostat	36.3656
COc1ccc(cc1)OC1CN(C1)C(=O)c1ccc2c(c1)OCO2		35.1875
CCCCc1nc2c(n1CCN(CC)CC)ccc(c2)/C=C/C(=O)NO	Pracinostat (SB939)	34.9789
CCN(Cc1ccc2c(c1)ccc(c2)COC(=O)Nc1ccc(cc1)C(=O)NO)CC	ITF2357 (Givinostat)	34.4153
C/C=C/1\NC(=O)[C@H]2CSSCC/C=C/[C@@H](OC(=O)[C@@H](NC1=O)C(C)C)CC(=O)N[C@@H](C(=O)N2)C(C)C	Romidepsin (FK228 ,depsipeptide)	33.3188
C/C=C(\C(=O)O[C@H]1C(=C[C@]23[C@]1(O)[C@H](O)C(=C[C@H](C3=O)[C@H]1[C@@H](C[C@H]2C)C1(C)C)CO)C)/C	Ingenol mebutate	32.9332
OC[C@H]1O[C@@H](OC2[C@@H](O)CC(O[C@@H]2C)OC2[C@@H](O)CC(O[C@@H]2C)OC2[C@@H](O)C[C@@H](O[C@@H]2C)O[C@H]2CC[C@]3([C@H](C2)CC[C@@H]2C3C[C@@H](O)[C@]3([C@]2(O)CC[C@@H]3C2=CC(=O)OC2)C)C)[C@@H]([C@H]([C@@H]1O)O)O	DESLANOSIDE	30.8946
ONC(=O)c1ccc(cc1)C#CCNC(=O)c1cc2c([nH]1)ccc(c2)OCCN(C)C	CRA-026440	29.7047
O=C1N(Cc2c1cccc2)C1CCN(CC1)Cc1ccc(cc1)C(F)(F)F		27.5774
ONC(=O)CCCC/C=C(/C(=O)NCCCN(C)C)\COc1cccc2c1cccc2	CG-200745	25.6922
ONC(=O)c1cnc(nc1)N(Cc1cc2c(s1)c(nc(n2)c1ccc(nc1)OC)N1CCOCC1)C	CUDC-907	25.3919
O=C(/C=C/c1cccnc1)NCc1ccc(cc1)C(=O)Nc1cc(F)ccc1N		25.1523
O=C1OCC(=C1)C1C(O)CC2(C1(C)CC[C@H]1[C@H]2CCC2C1(C)CCC(C2)OC1CC(O)C(C(O1)C)OC1CC(O)C(C(O1)C)OC1CC(O)C(C(O1)C)O)O	GITOXIN	24.8085
COc1cccc(c1)S(=O)(=O)N1CCCC1C(=O)N1CCC(CC1)N1CCCC1=O		24.5724
CCn1c(nc2c1c(OC[C@H]1CCCNC1)cnc2C#CC(O)(C)C)c1nonc1N	GSK-690693	24.4715
ONC(=O)/C=C/c1ccn(c1)S(=O)(=O)c1ccc(cc1)CN(C)C	Resminostat (RAS2410)	24.4678
Oc1ccc(cc1)c1oc2cc(O)cc(c2c(=O)c1O)O	KAEMPFEROL	24.3279
CN(C(CN1c2ccccc2Sc2c1cccc2)C)C	Phenergan58-33-3	23.7489
O=C[C@]12CC[C@@H](C[C@H]1CC[C@@H]1[C@@H]2CC[C@]2([C@]1(O)CC[C@@H]2C1=CC(=O)OC1)C)OC1OC(C)C(C(C1O)O)O		23.4278
ONC(=O)c1ccc(cc1)C1=Nc2ccccc2Oc2c1cccc2	EVP-0334	22.7244
ONC(=O)/C=C/c1cccc(c1)S(=O)(=O)Nc1ccccc1	Belinostat (PXD101)	22.1465
COC1CC(OC2CCC3(C(C2)(O)CC[C@@H]2[C@@H]3CCC3(C2(O)CCC3C2=CC(=O)OC2)C)C=O)OC(C1O)C	CYMARINE	21.3682
O=C[C@@]12CC[C@@H](C[C@@]2(O)CCC2C1CC[C@]1([C@]2(O)CC[C@@H]1C1=CC(=O)OC1)C)O	Strophanthidine	20.7722
Cc1ccc(cc1)S(=O)(=O)N1CCCC(C1)C(=O)N1CCC(CC1)N1CCCC1=O		19.979
C[n+]1cc2c3OCOc3ccc2c2c1c1cc3OCOc3cc1cc2	SANGUINARINE SULFATE	19.4457
ONC(=O)c1ccc(cc1)NC(=O)[C@H](c1ccccc1)C(C)C	AR-42 (HDAC-42)	19.413
CCSCc1ccc2c(c1)c1c3C(=O)NCc3c3c4c1n2[C@H]1C[C@]([C@](O1)(n4c1c3cc(cc1)CSCC)C)(O)C(=O)OC	CEP-1347	19.2962
COc1ccc2c(c1)c(CCN(C(C)C)C(C)C)cn2	5-MeO-DIPT	19.2034
CCS(=O)(=O)Nc1ccc(c(c1)c1cn(C)c(=O)c2c1cc[nH]2)Oc1ccc(cc1F)F	ABBV-075	19.1147
N#CN/C(=N\CCCCCCOc1ccc(cc1)Cl)/Nc1ccncc1	CHS-828	18.5527
CC1CCC2N(C1)CCc1c2n(Cc2ccccc2)c2c1cccc2		18.4478
Clc1ccc(cc1)c1coc2c(c1=O)ccc(c2)O		18.4178
O=c1nc2c(n1)c(cc(c2)c1c(C)noc1C)c1c(nnc1C1CC1)C1CC1	GS-5829	17.9172
CCOP(=O)(Cc1ccc(cc1)NC(=O)[C@@H]1S[C@@H](C)C(=O)c2c(C1)cc1OCOc1c2)OCC	TAK-778-SR	17.7741
OC[C@@]12[C@H](O)C[C@@H](C[C@@]2(O)CC[C@@H]2C1C(O)C[C@]1([C@]2(O)CC[C@@H]1C1=CC(=O)OC1)C)O[C@H]1OC(C)[C@H](C(C1O)O)O	G-Strophanthin	17.5202
O=C(C[C@@H]1N=C(c2ccc(cc2)Cl)c2c(n3c1nnc3C)sc(c2C)C)Nc1ccc(cc1)O	OTX-015	17.2509
O=C1OCC(=C1)[C@H]1CC[C@]2([C@]1(C)[C@H](O)C[C@H]1[C@H]2CC[C@H]2[C@]1(C)CC[C@@H](C2)O[C@H]1C[C@H](O)[C@@H]([C@H](O1)C)O[C@H]1C[C@H](O)[C@@H]([C@H](O1)C)O[C@H]1C[C@H](O)[C@@H]([C@H](O1)C)O)O	Digoxin	16.9892
CCCCc1ccc2c(c1)nc([nH]2)NC(=O)OC	PARBENDAZOLE	16.7538
OC[C@@H]1O[C@@H](C(C1O)O)n1cnc2c1nc(OCCc1ccc(cc1)Cl)nc2N	sonedenoson	16.6216
OCC1OC(OC2C(C)OC(CC2OC(=O)C)OC2C(O)CC(OC2C)OC2C(O)CC(OC2C)OC2CCC3(C(C2)CC[C@@H]2[C@@H]3CCC3(C2(O)CCC3C2=CC(=O)OC2)C)C)C(C(C1O)O)O	LANATOSIDE A	16.4541
OC[C@H]1O[C@@H](O[C@@H]2[C@@H](C)O[C@H](C[C@@H]2OC(=O)C)O[C@H]2[C@@H](O)C[C@@H](O[C@@H]2C)O[C@H]2[C@@H](O)C[C@@H](O[C@@H]2C)O[C@H]2CC[C@]3([C@@H](C2)CC[C@@H]2[C@@H]3C[C@@H](O)[C@]3([C@]2(O)CC[C@@H]3C2=CC(=O)OC2)C)C)[C@@H]([C@H]([C@@H]1O)O)O	LANATOSIDE C	16.3668
CCCCCCCCCCCCCC(=O)O[C@@H]1[C@@H](C)[C@@]2(O)[C@H]([C@H]3[C@]1(OC(=O)C)C3(C)C)C=C(C[C@]1([C@H]2C=C(C1=O)C)O)CO	Phorbol 12-myristate 13-acetate	15.7922
CN1CCN(CC1)CCCN=C(C[C@@H]1N=C(c2ccc(cc2)Cl)c2c(n3c1nnc3C)sc(c2C)C)O	TEN-010	15.7086
CN(C1CCc2c1cccc2)Cc1cccc(c1)C(F)(F)F		15.652
CCOC(=O)C1=C[C@]2(CC)CCCN3[C@@H]2c2n1c1ccccc1c2CC3	vinpocetine	15.4767
COc1ccccc1N1CCN(CC1)C(=O)c1cccc2c1cccc2		15.2977
O[C@H]1CC[C@]2([C@@H](C1)CC[C@@H]1[C@@H]2CC[C@]2([C@]31O[C@@H]3C[C@@H]2c1ccc(=O)oc1)C)C	Bufogenin	15.2321
Nc1nc(N)c2c(n1)NCCC(=N2)c1ccccc1		15.0758
O[C@@H]1CCCC[C@H]1N(C(=O)NCCCOc1ccc2c(c1)ccc(=O)[nH]2)C1CC1	OPC 33509	14.9319
O=C(Cc1ccc(cn1)c1ccc(cc1)N1CCOCC1)NCc1cccc(c1)F	KX-02	14.7537
O=C(c1ccc(cc1)/C=C/c1cnc2c(c1)cccc2)Nc1cc(n(c1)C)C(=O)Nc1cc(n(c1)C)C(=O)NCCN1CCOCC1	MGB-BP-3	14.6589
COc1cc(ccc1O)CC(=O)OCC1=C[C@H]2[C@H]3O[C@]4(O[C@]2([C@H]2[C@@](C1)(O)C(=O)C(=C2)C)[C@@H](C[C@@]3(O4)C(=C)C)C)Cc1ccccc1	Resiniferatoxin	14.647
COCC1=C(C(=O)OC(OC(=O)OC(C)C)C)N2[C@H](SC1)[C@@H](C2=O)NC(=O)/C(=N\OC)/c1csc(n1)N	CEFPODOXIME PROXETIL	13.7302
CCC1=C[C@H]2CN(C1)CCc1c([C@@](C2)(C(=O)OC)c2cc3c(cc2OC)N([C@@H]2[C@@]43CCN3[C@H]4[C@@](CC)(C=CC3)[C@H]([C@]2(O)C(=O)OC)OC(=O)C)C)[nH]c2c1cccc2	anhydrovinblastine	13.6445
OC[C@H]1O[C@@H](S[C@@H]2O[C@H](CO)[C@@H]([C@@H]([C@H]2O)n2nnc(c2)c2cccc(c2)F)O)[C@@H]([C@H]([C@H]1O)n1nnc(c1)c1cccc(c1)F)O		13.5405
Oc1cc(CCNCCCCCCNCCc2ccccc2)ccc1O	DOPEXAMINE	13.4436
O=C(c1n[nH]cc1NC(=O)c1c(Cl)cccc1Cl)NC1CCNCC1	AT-7519	13.3948
CCS(=O)(=O)N1CCN(CC1)c1ccc(cc1)Nc1ncc(c(n1)NC1CC1)C(=O)N	Cerdulatinib	13.3751
CCc1nc2ccc(cc2c(=O)n1Cc1ccc(cc1F)c1ccccc1S(=O)(=O)NC(=O)OCCC1CC1)NC(=O)N(C(C)C)C	L 163579	13.3496
CN1OC2C(C1Cc1ccccc1)C(=O)CCC2	SP-1640	13.2811
COc1ccc(cc1)C(=O)/C(=C(/c1ccc2c(c1)OCO2)\C(=O)O)/Cc1cc(OC)c(c(c1)OC)OC	PD-156707	13.1448
Clc1cc(Sc2cc(Cl)cc(c2O)Cl)c(c(c1)Cl)O	BITHIONATE	12.802
OC[C@H]1O[C@H]([C@@H]([C@@H]1O)O)n1cnc2c1nc(nc2N)n1ncc(c1)C(=O)NC	Regadenoson	12.6882
CCN1CCC(CC1)Nc1ccc2c(c1)/C(=C(\c1[nH]cc(n1)C)/c1cccc(c1)F)/C(=O)N2	XL-999	12.5919
COc1cccc(c1)c1ccc(cc1)C(=O)NCCNC(=O)Cc1cccc(c1)Cl		12.4194
Fc1ccc(cc1)n1cc(c2c1cccc2)CCCCN1CCC2(CC1)OCc1c2cccc1	Siramesine	12.3355
Brc1ccccc1CN1CCCC21Cc1ccccc1CNC2=O		12.2457
Clc1ccc(c(c1)Cl)C(=O)NS(=O)(=O)c1ccc(s1)Br	Tasisulam sodium	12.2009
CN(CCSc1ccc(s1)/C=c/1\[nH]c(=O)/c(=C/c2ccccc2)/[nH]c1=O)C	XR 5118	12.1569
Cc1nc(C)c(nc1C)C	Chuanxiongzine	12.0889
Cn1c(nc2c1c(=O)n(c(=O)n2C)C)N1CCOCC1		12.0248
COCCCOc1cc(ccc1OC)C[C@H](C(C)C)CC([C@H](C[C@H](C(=O)NCC(C(=O)N)(C)C)C(C)C)O)N	TEKTURNA HCTZ	11.9849
COc1cc2N(C)[C@@H]3[C@@]4(c2cc1[C@]1(C[C@@H]2CN(CCc5c1[nH]c1c5cccc1)C[C@](C2)(O)CC)C(=O)OC)CCN1[C@H]4[C@@]([C@H]([C@]3(O)C(=O)N)O)(CC)C=CC1	VINDESINE SULFATE	11.9389
O=C([C@H]1CCC2[C@]1(C)CC[C@@H]1[C@@H]2CC[C@@H]2[C@]1(C)CC[C@@](C2)(C)O)CSS(=O)(=O)[O-]	CO122739	11.8584
CC(N1CCC(CC1)N(c1ccc(cc1)Cl)C(=O)Cc1ccccc1)C	lorcainide	11.8116
OC[C@H]1O[C@@H](O[C@@H]2[C@@H](C)O[C@H](C[C@@H]2OC(=O)C)O[C@H]2[C@@H](O)C[C@@H](O[C@@H]2C)O[C@H]2[C@@H](O)C[C@@H](O[C@@H]2C)O[C@H]2CC[C@]3([C@@H](C2)CC[C@@H]2[C@@H]3CC[C@]3([C@]2(O)C[C@@H]([C@@H]3C2=CC(=O)OC2)O)C)C)[C@@H]([C@H]([C@@H]1O)O)O	LANATOSIDE B	11.695
O[C@@H]1CO[C@H](C[C@@H]1O)O[C@H]1C[C@@](N)(Cc2c1c(O)c1c(c2O)C(=O)c2c(C1=O)cccc2)C(=O)C	Amrubicin	11.6818
Oc1cc(cc(c1)O)CN1CCCC21Cc1ccccc1CNC2=O		11.6775
O=CN1c2cc(OC)c(cc2[C@]23[C@@H]1[C@@](O)(C(=O)OC)[C@H](OC(=O)C)C1([C@@H]3N(CC2)CC=C1)CC)[C@]1(C[C@@H]2CN(CCc3c1[nH]c1c3cccc1)C[C@](C2)(O)CC)C(=O)OC	vincristine, Liposome Co	11.5829
CO[C@H]1[C@@H](O)C[C@@H](O[C@@H]1C)O[C@H]1[C@@H](O)C[C@@H](O[C@@H]1C)O[C@H]1[C@@H](O)C[C@@H](O[C@@H]1C)O[C@H]1CC[C@]2([C@@H](C1)CC[C@@H]1[C@@H]2C[C@@H](O)[C@]2([C@]1(O)CC[C@@H]2C1=CC(=O)OC1)C)C	Metildigoxin	11.5084
COc1cc(ccc1Nc1nc2n(n1)ccc(c2)c1ccc(cc1)NC(=O)C(c1ccc(cc1)F)C)S(=O)(=O)C	BAY-1161909	11.4877
CC(=O)O[C@]1(C(=O)C)C(=C)C[C@@H]2[C@]1(C)CC[C@H]1[C@H]2CCC2=CC(=O)CC[C@H]12	Elcometrine	11.4214
OC(=O)[C@H](Cc1cc(Br)c(c(c1)Br)O)N	BROMOTIREN	11.3861
O=C(Nc1cc(F)c2c(c1O)C(=O)C1[C@@H](C2)C[C@@H]2[C@@](C1=O)(O)C(=O)C(C(=O)[C@H]2N(C)C)C(=O)N)CN1CCCC1	eravacycline	11.2775
OC(=O)CCCCC(SCc1ccccc1)CCSCc1ccccc1	AML therapy, Cornerstone Pharmaceuticals	11.2688
OCC(OCn1ccnc1[N+](=O)[O-])CO	RP 170	11.2542
COc1c(OC)cc2c(c1OC)c1ccc(c(=O)cc1[C@H](CC2)NC(=O)C)OC	COLCHICINE	11.2524
Clc1c[nH]c2c1cccc2NS(=O)(=O)c1ccc(cc1)S(=O)(=O)N	indisulam	11.1064
Fc1ccc(cc1)c1noc(c1COc1ccc(cn1)C(=O)N1CCS(=O)(=O)CC1)C	Basmisanil	11.0875
CCOc1ccc(c(c1)NC(=O)CC(N)C)c1cccnc1	K-953	11.0035
COc1ccc2c(c1)nc([nH]2)S(=O)Cc1ncc(c(c1C)OC)C		10.9383
CC(=O)Nc1cccc(c1)N1CCN(CC1)CCCCNS(=O)(=O)CC1CCCCC1	PRX-00023	10.8802
COCCOCCOCCOCCOC(=O)OC[n+]1ccc(cc1)N/C(=N/C#N)/NCCCCCCOc1ccc(cc1)Cl	Teglarinad chloride	10.8211
O=C(C1NC(=O)N(C1)C1CCCCC1)NCc1ccc2c(c1)OCO2		10.804
OC(=O)Cn1c(cc2c1cccc2)C(=O)Nc1scc(n1)c1ccccc1Cl	SR 27897 hydrate	10.7437
CN[C@@H]1COc2c([C@@H](C1)O)cccc2	exepanol	10.6637
COC1C(OC(=O)C)C(OC2CC[C@]3([C@H](C2)CCC2[C@@H]3CC[C@]3(C2(O)CC[C@H]3c2ccc(=O)oc2)C)C=O)OC(C1OC(=O)C)C		10.5745
ClCCN(c1ccc2c(c1)nc(n2C)CCCCCCC(=O)NO)CCCl	CY-190602	10.5566
CO/N=C(\c1csc(n1)NC(=O)C(N)C)/C(=O)NC1C(=O)N2C1SCC=C2C(=O)O		10.5554
CC(N(C(C)C)CCc1c[nH]c2c1cccc2)C	DIPT	10.483
NCCCCC(C(=O)O)NCNC(=O)C1=C(O)[C@@H](N(C)C)[C@H]2[C@](C1=O)(O)C(=C1[C@H](C2)[C@](C)(O)c2c(C1=O)c(O)ccc2)O		10.4679
Oc1nc2c(n1C1CCN(CC1)CCOc1ccccc1)cccc2	Oxiperomide	10.4047
CCCCC[C@@H](/C=C/[C@H]1[C@H](O)C[C@@H]([C@@H]1C/C=C\CCCC(=O)OC(C)C)O)O	PGF2alpha-IE	10.2627
NCCCC[C@@H]1NC(=O)[C@H](CSSC[C@H](NC(=O)[C@H](CO)NC(=O)[C@@H](NC(=O)[C@H](Cc2ccccc2)NC(=O)[C@@H](NC(=O)[C@@H](NC(=O)[C@@H](NC(=O)[C@@H](NC(=O)[C@@H](NC(=O)[C@@H](NC1=O)CC(=O)N)Cc1ccccc1)Cc1ccccc1)Cc1cnc2c1cccc2)CCCCN)[C@H](O)C)[C@H](O)C)C(=O)O)NC(=O)CNC(=O)[C@@H](N)C	Somatostatin	10.1901
COc1ccc(cn1)NC(=O)c1nnc2c1cc(cc2)c1cncc(c1)CN1CCC(C1)(F)F	SM-04690	10.1152
Cn1nc(c(c1)CN1CCC(CC1)c1ccc(cc1)C(=O)Nc1ccccc1N)C	AZD-9468	10.0592
CCOC(C(=O)O)Cc1ccc(cc1)OCCN1c2ccccc2Oc2c1cccc2	RAGAGLITAZAR	10.0207
CN(CC(CN1c2ccccc2Sc2c1cccc2)C)C	TRIMEPRAZINE TARTRATE	10.0104
COc1ccc2c3c1O[C@@H]1[C@@]43CCN([C@H](C2)[C@@H]4CC[C@@H]1O)C	Dihydrocodeine Bitartrate	9.9878
CCN(C(CN1c2ccccc2Sc2c1cccc2)C)CC	Ethopropazine hydrochloride	9.98456
OCC1O[C@H](CC1O)n1cc(I)c(nc1=O)N	ibacitabine	9.94713
CC(CC(=O)Nc1cncc(c1)c1ccc2c(c1)c(n[nH]2)c1nc2c([nH]1)cncc2c1cccc(c1)F)C	SM04646	9.85351
OC[C@H](NCc1ccc2c(c1)c1ccccc1n2CC)C		9.76562
O/N=C(\c1cc2c(s1)cc(c(c2)OC)OC)/N	ORG 30029	9.69942
[Hg+]c1ccccc1	PHENYLMERCURIC BORATE	9.69624
O[C@@H]1[C@@H](O)[C@@H](O[C@@H]([C@H]1O)C(=O)O)O[C@H]1C=C[C@@H]2[C@@]34[C@H]1Oc1c4c(C[C@H]2N(CC3)C)ccc1O	Morphine 6-Î^2-D-glucuronide hydrate	9.66402
Fc1ccc2c(c1)nc(s2)/C=C/c1cccc(c1)COc1ccc(cc1)n1c(C)nc2c1ccnc2	CP 96021	9.62777
CC(=CCc1c2O[C@]34[C@@]5(C/C=C(\C(=O)O)/C)OC([C@@H]4C[C@H](C5=O)C=C3C(=O)c2c(c2c1O[C@](C)(CCC=C(C)C)C=C2)O)(C)C)C	Gambogic acid	9.60767
CN(CCn1c2ccccc2c2c1nc1cc(C)c(cc1n2)C)C	B-220	9.54255
O=C(c1ccc2c(c1)OC(O2)(F)F)NC1Cc2c(C1)cccc2	AVE3085	9.5385
Fc1cnc(c(c1)C(=O)N[C@@H]1CC[C@@H](CC1)NC(=O)c1cc(C)ccc1O)Oc1ccc(c(c1)F)F	UK-500001	9.50914
COc1ccc(cc1Cl)CNc1nc(nc2c1c1ccccc1s2)[C@@H]1CC[C@H](CC1)C(=O)O	EMD-221829	9.4885
O=C(c1c[nH]c2c1cccc2)OCCN1CCCCC1	SB 203186	9.48443
Clc1ccc(cc1)Cn1cc(c2c1cccc2)C(=O)C(=O)Nc1ccc2c(c1)cccn2	Entasobulin	9.4191
O=C(N(Cc1cccc(c1)C(F)(F)F)C)C1CC1		9.41787
O=C1C=CC(C=C1)(O)c1cc2c(n1S(=O)(=O)c1ccccc1)cccc2	BW-114	9.38625
N#Cc1ccc(cc1)S(=O)(=O)Nc1cccc(c1)C(c1c(=O)oc2c(c1O)CCCCCC2)C1CC1	U-103017	9.34507
CCCCc1cc(c(n1Cc1ccc(cc1)c1ccccc1c1nnn[nH]1)C=O)CC(C)C	CR-3834	9.34236
OC[C@H]1O[C@H](C(C1O)O)n1c(=O)sc2c1nc(N)nc2O	Isatoribine	9.32607
CC(CCC[C@H]([C@H]1CC[C@@H]2[C@]1(C)CCC/C/2=C\C=C/1\C[C@@H](O)CCC1=C)C)C	Cholecalciferol	9.32362
CCCC=c1[nH]n(c(=O)n1Cc1ccc(cc1)c1ccccc1S(=O)(=O)NC(=O)c1sccc1C)c1ccccc1C(F)(F)F		9.31683
C[C@H]1C[C@@H](N)C[C@H](C1)c1ccncc1NC(=O)c1ccc(c(n1)c1c(F)cccc1F)F	LGH-447	9.23622
CCOC(=O)Nc1ccc(cc1N)NCc1ccc(cc1)F	ezogabine	9.15459
CC[Hg]Sc1ccccc1C(=O)[O-]	THIMEROSOL	9.15032
O=C1/C(=C\c2ccc(cc2)/C=C\2/C3CCC(C2=O)(C3(C)C)CS(=O)(=O)O)/C2C(C1(CC2)CS(=O)(=O)O)(C)C	Ecamsulum	9.12672
CCCN1C[C@H](CSC)C[C@H]2[C@H]1Cc1c[nH]c3c1c2ccc3	pergolide	9.11421
CN(CCCn1cc(c(n1)c1ccccc1)c1ccccc1)C	Fezolamine fumarate	9.05146
CC(=O)O[Hg]c1cc(ccc1O)C(CC(C)(C)C)(C)C	ACETOMEROCTOL	9.03822
O[C@H]1CC[C@]2([C@@H](C1)CC[C@@H]1[C@@H]2CC[C@]2([C@]1(O)CC[C@]2(O)c1ccoc1)C)C	rostafuroxin	9.0343
CCOC(=O)C1=C[C@]2(CC)CCCN3[C@@H]2c2n1c1ccccc1c2CC3	vinpocetine	8.98718
COC(=O)C1=C[C@]2(CC)CCCN3[C@@H]2c2n1c1ccccc1c2CC3	cis-Apovincamine	8.9694
O=c1[nH]/c(=C\c2nc[nH]c2C(C)(C)C)/c(=O)[nH]/c/1=C\c1ccccc1	plinabulin	8.96428
OC(=O)CCCCc1ccc(cc1)I		8.93652
Oc1ccc2c(c1)c(CCCCN1CCC(=CC1)c1ccccc1)c[nH]2	Roxindole	8.93276
OC(=O)CN(c1ccccc1OCCOc1ccccc1N(CC(=O)O)CC(=O)O)CC(=O)O	DP-b99 metabolite	8.92802
CCOP(=O)(Cc1ccc(cc1)c1nc2c(s1)cccc2)OCC	Fostedil	8.88024
O=NC1CC[C@H]2C(=C1)CC[C@@H]1[C@@H]2CC[C@]2([C@H]1CC[C@]2(C#C)OC(=O)C)CC	Norgestimate	8.8599
N#Cc1cccc(c1)C1C=C(NC2=C1C(=O)CCC2)C(F)(F)F	AZD 0947	8.79925
ClCCN(C(=O)NCCSSCCNC(=O)N(N=O)CCCl)N=O	ditiomustine	8.78834
COc1ccc(c(c1)c1ccc(nc1N)NC(=O)c1ccnn1C)Cl	PF-04531083	8.78318
COc1ccc(cc1[C@@]1(F)C(=O)Nc2c1ccc(c2)C(F)(F)F)Cl	Flindokalner	8.77907
O=C(Nc1ccccc1C(=O)O)Nc1cccc(c1)C(F)(F)F	NS 1652	8.77077
COc1cc2CCN3[C@H](c2cc1OC)Cc1c(C3)c(OC)c(cc1)OC	(S)-(-)-Tetrahydropalmatine	8.75639
Fc1ccc(cc1)c1ccc(c(n1)C)C(=O)Nc1ccc2c(c1)nc(s2)C	782443	8.75022
CNCC/C=C/1\c2ccccc2CC(c2c1cccc2)O	E-10-OH-NT	8.72162
CN([C@@H]1CCN(C1)c1ccc2c(c1)nc(n2)c1c(=O)nc2c(c1N)cccc2)C	CHIR-200131	8.65724
NC1CONC1=O	D-cycloserine, Searle	8.64314
CCc1cnc(nc1)N1CCC(CC1)c1scc(n1)COc1ccc(cc1)n1cnnn1	SAR-260093	8.52904
COc1cc2c(ncnc2cc1OC)Nc1ccc(cc1)O	JANEX-1	8.52572
COc1cccc(c1)C#CCO/N=C/1\CN2C[C@H]1CC2	PD-151832	8.50888
Nc1ccc(cc1)C(=O)N1CCc2c1ccc(c2)S(=O)(=O)N1C[C@@H](NC1=O)c1ccccc1	DW 2282	8.49818
CCOC(=O)Nc1nc(N)c2c(c1)[nH]c(c([nH]2)c1ccccc1)C	mivobulin isethionate	8.42258
CN[C@@H](C(c1ccccc1)(C)C)C(=O)N[C@@H](C(C)(C)C)C(=O)N([C@@H](C(C)C)/C=C(/C(=O)O)\C)C	taltobulin	8.41862
CC(CCC[C@H]([C@H]1CC(=O)C2=C3C(CC[C@]12C)[C@@]1(C)CC[C@@H](C[C@@H]1CC3)O)C)C	colestolone	8.39673
Cc1cccc2c1C=Cc1c(C2=CCC[N+](C)(C)[O-])cccc1	Ro-8-1998	8.37991
NC1CCN(CC1)c1cccc2c1nc(cc2)n1cnc2c1ccc(c2)OCC1(C)COC1	Crenolanib (CP-868596)	8.37773
CCCCc1cc2ccccc2c(n1)OCCN(C)C	DIMETHISOQUIN	8.36354
Oc1ccc(cc1)C(c1cc(ccc1O)/C=N/n1nnnc1C)c1cc(ccc1O)/C=N/n1nnnc1C	VP-14637	8.3369
CN(CCc1sc2c(c1[C@H](c1ccccn1)C)cccc2)C	NBI-75043	8.32324
Cc1ccc(c(c1)C(c1ccccc1)CCN(C(C)C)C(C)C)O	tolterodine	8.30486
OC[C@H]1O[C@H]([C@@H]([C@@H]1O)O)n1cnc2c1ncnc2NCC=C(C)C	RIBOPRINE	8.29893
CNCC(c1ccc(c(c1)OC(=O)C(C)(C)C)OC(=O)C(C)(C)C)O	dipivefrin	8.2577
OC(CN1CCCCC1)CO/N=C(/c1cccnc1)\Cl	BIMOCLOMOL	8.19183
O[C@H](c1ccccc1)CNC(CCc1ccc(cc1)C(=O)N)(C)C	LY 195448	8.18998
O=C1N=c2n(C31Cc1c(C3)cccc1)cccc2	ZSET 1446	8.18035
CNC(=O)c1c[nH]c2c1nccc2		8.16832
O=C(NC1N=C(c2ccccc2)c2c(N(C1=O)CC(C)C)cccc2)Nc1cccc(c1)c1nnn[nH]1	L 368935	8.1674
CCC(=O)Nc1c(C)cc(cc1C)C(=O)N1CCC(CC1)N(CCc1ccccc1)C	OPC 28326	8.12532
FCC(Cn1cnc2c1ncnc2N)O		8.10705
CCCN1CCC(CC1)c1nc2c(n1)cccc2C(=O)N	ABT-472	8.08845
N#Cc1ccccc1c1cc(cn(c1=O)c1ccccc1)c1ccccn1	perampanel	8.07616
OCC(C(C(C(COC1OC(CO)C(C(C1O)O)O)O)O)O)O	ISOMALT	8.06554
O=C(C(Oc1ccccc1)(C)C)OCCN1CCOCC1	PROMOLATE	8.04859
OC(=O)CSC(c1ccc(cc1)OCc1ccc2c(n1)cccc2)CCCc1ccccc1	AZD-4769	8.04027
CC(NC(=O)N1CCC2(CC1)CN(Cc1c(O2)cccc1)C(=O)C)C		8.03171
CCN1CC2CN(CC(C1)C2OC(=O)c1ccc(cc1)Cl)C	BISARAMIL	8.02731
Clc1ccc(c(c1)Cc1cccc(n1)C(=O)O)OCc1ccc(cc1F)Cl	GSK-269984A	8.00423
CC[C@H](CCCCC(=O)N[C@H](C(=O)N[C@H](C(=O)N[C@H](C(=O)N[C@H]1CCNC(=O)[C@@H](NC(=O)[C@H](CCNCS(=O)(=O)[O-])NC(=O)[C@@H](NC(=O)[C@@H](NC(=O)[C@H](NC(=O)[C@@H](NC1=O)CCNCS(=O)(=O)[O-])CC(C)C)CC(C)C)CCNCS(=O)(=O)[O-])[C@H](O)C)CCNCS(=O)(=O)[O-])[C@H](O)C)CCNCS(=O)(=O)[O-])C	Colistin A sodium methanesulfonate	7.95589
O=C1NCc2c(CC31CCCCN3Cc1ccc(c(c1)C)C)cccc2		7.93392
Clc1ccc2c(c1)[nH]cc2C1=CCN(CC1)CC[C@@H]1CN(c2c1cccc2)C(=O)C	LU 35138	7.93371
OC(=O)Cc1nn(Cc2ccc(cc2F)Br)c(=O)c2c1cccc2	Ponalrestat	7.92435
CC1COC2=C1C(=O)C(=O)c1c2ccc2c1CCCC2(C)C	Cryptotanshi	7.89542
O=C(Nc1c(C)cccc1C)CN1CCCC1=O	Nefiracetam	7.89412
COc1cc2nc(nc(c2cc1OC)NCCN1CCOCC1)c1ccc(cc1)N1CCN(CC1)C	CPG-52364	7.89083
OC[C@@H]1O[C@@H](CC1OC(=O)[C@H](C(C)C)N)n1ccc(nc1=O)N	Valtorcitabine dihydrochloride	7.8704
COc1ccc(cc1)/C(=C(\c1ccccc1)/[N+](=O)[O-])/c1ccc(cc1)OCCN1CCCC1	NITROMIFENE	7.86683
Oc1ccc2c(c1)CN[C@H](C2)C(=O)N[C@@H](C(C)C)CN1CC[C@@]([C@H](C1)C)(C)c1cccc(c1)O	JDTic dihydrochloride	7.86621
CS(=O)(=O)Nc1scc(n1)CN1CCC(CC1)c1c[nH]c2c1cccc2	FK-613	7.8457
Clc1ccc(cc1)Nc1nnc(c2c1cccc2)Cc1ccncc1	Vatalanib succinate	7.82795
Fc1ccc(cc1)C(=O)N1CCCC1C(=O)N1CCC(CC1)N1Cc2c(C1=O)cccc2		7.79396
COP(=S)(SCN1C(=O)c2c(C1=O)cccc2)OC	SIMEDAN	7.77781
N#Cc1ccc(cc1)CN1CCCCC21Cc1ccccc1CNC2=O		7.76697
O=C(c1cc2c(n1)cccc2)N[C@H]1N=C(c2ccccc2F)c2c3N(C1=O)CCc3ccc2	FK480	7.74757
CC(=O)OC1CCC2(C(=CCC3C2CCC2(C3CCC2OC(=O)C)C)C1)C		7.71129
COc1ccc(cn1)c1ccc2c(c1)c1c(cn2)n(c(=O)n1c1ccc(c(c1)C(F)(F)F)N1CCNCC1)C	NVP-BGT226	7.70287
O=C(O[C@@H]1C[C@@](O)(C[C@H]([C@H]1O)O)C(=O)O)/C=C/c1ccc(c(c1)O)O	CHLOROGENIC ACID	7.69091
CCCCC[C@@H](/C=C/C1[C@@H](O)C[C@H]2[C@@H]1C/C(=C\CCCC(=O)O)/O2)O	epoprostenol	7.67812
OC(=O)C(CC(=O)c1ccc(cc1)c1ccc(cc1)Cl)CSc1ccccc1	TANOMASTAT	7.62835
OC[C@H]1O[C@H]([C@H]([C@H]1O)O)n1cc(c2c1ncnc2N)C#N	Toyocamycin	7.582
CC[n+]1c(/C=C/C=C/C=c/2\sc3c(n2CC)cccc3)sc2c1cccc2	DITHIAZANINE IODIDE	7.56569
Clc1ccc(cc1)/C=N/N/C(=N/N=C/c1ccc(cc1)Cl)/N	Robenidine hydrochloride	7.53929
CCCCCCc1[nH]c2c(n1)n1[C@H]3CCC[C@H]3N=c1n(c2=O)C	SCH 59498	7.53653
CSc1ccc(cc1)Sc1ccc(cc1CN(C)C)Cl		7.4744
OC(COc1ccc(cc1)CCOCC1CC1)CNC(C)C		7.47352
Oc1nc2nc3ccccc3nc2c(n1)O	ALLOXAZINE	7.45162
Clc1ccc2c(c1)[nH]c(=O)n2C1CCN(CC1)CCCn1c(=O)[nH]c2c1cccc2	domperidone	7.44338
O=CO[C@@H](C(=O)N[C@@H]1C(=O)N2[C@@H]1SCC(=C2C(=O)O)CSc1nnnn1C)c1ccccc1	Cefamandole nafate	7.44201
CCN[C@H]1C[C@H](C)S(=O)(=O)c2c1cc(s2)S(=O)(=O)N	DORZOLAMIDE HYDROCHLORIDE	7.43954
CC(=O)OCC(=O)[C@@]1(OC(=O)c2ccco2)[C@H](C)C[C@@H]2[C@]1(C)C[C@H](O)[C@]1([C@H]2CCC2=CC(=O)C=C[C@]12C)F	dexamethasone acefurate	7.42675
CCCCN1C(=O)C2C(=O)N(C(=O)C(C1=O)C2(C)C)CCCCN1CCN(CC1)c1ccccc1OC	Umespirone	7.42305
OCC(c1ccccc1)C(=O)OC1CC2CCC(C1)[N+]2(C)C	Atropine methyl bromide	7.42024
O=C1NC(=O)C(S1)Cc1ccc(cc1)OCC1(C)CCCCC1	ciglitazone	7.41541
Clc1ccc2c(c1)nc(cc2)/C=C/c1cccc(c1)[C@H](CCc1ccccc1C(O)(C)C)SCC1(CC1)C(=O)O		7.40467
CC(c1c(C)n(n(c1=O)c1ccccc1)C)C	PROPYPHENAZONE	7.3939
C/C=C/1\CC[C@@H]2[C@]1(C)CC[C@H]1[C@H]2[C@@H](O)[C@@H]([C@@H]2[C@]1(C)CC[C@@H](C2)O)O	IPL-576092	7.38422
Oc1ccc(cc1)[C@@H]1COc2c([C@H]1O)ccc(c2)O	TRANS-NV-04	7.37654
OC[C@H]1OC(C[C@@H]1O)n1cnc(nc1=O)N	Decitabine	7.37543
CCCCCCCC/C=C\CCCCCCCCOP(=S)(O)O	RX-100	7.37426
CC(NCC(c1ccc(c(c1)O)O)O)C	ISOPROTERENOL HYDROCHLORIDE51-30-9	7.3736
Oc1nc(c(s1)Cc1ccc(cc1)OCc1nc2c(n1C)cc(cc2)Oc1cc(C)c(c(c1)C)N)O	2016-03-02: Efatutazone hydrochloride	7.36654
CCC[C@@H](c1cccnc1)Nc1nc(ncc1C)c1ccc(c(c1)OC)NC(=O)NCC	Lexibulin hydrochloride	7.3639
Fc1cc(F)cc(c1)C(=O)Nc1ccc(cc1)[C@H](CNS(=O)(=O)C(C)C)C	LY-450108	7.35263
O=C(c1ccc2n(c1)ccn2)NC1CCCCCC1		7.35216
O[C@H]1C[C@@H](C[C@H]1COS(=O)(=O)N)n1ccc2c1ncnc2N[C@H]1CCc2c1cccc2	Pevonedistat	7.33287
COc1cc2CCN([C@@H]3c2cc1Oc1cc(ccc1O)C[C@@H]1c2c(CC[N+]1(C)C)cc(c(c2Oc1ccc(C3)cc1)O)OC)C	TUBOCURARINE CHLORIDE	7.2948
COc1ccc(cc1)CC(=O)N1Cc2ccccc2CC2(C1)CCCCN2C		7.28129
O=C(Nc1ccccc1C(=O)O)Nc1cccc(c1)C(F)(F)F	NS 1652	7.23666
COc1ccc(cc1)N(c1nc(C)nc2c1cccc2)C	verubulin	7.21818
O[C@]1(CCN2[C@@H](C1)c1cccc3c1[C@@H](C2)c1ccccc1CC3)C(C)(C)C	butaclamol	7.20575
CCCCNC(=N)NC(=N)N	BUFORMIN	7.19595
CNCc1nnc2n1c1ccc(cc1C(=NC2)c1ccccc1)Cl	N-Desmethyladinazolam	7.18585
OCC1=C(C)C[C@@H](OC1=O)[C@H]([C@H]1CCC2[C@]1(C)CCC1[C@H]2C[C@@H]2[C@]3([C@]1(C)C(=O)C=C[C@@H]3O)O2)C	WITHAFERIN A	7.15572
Cc1cc(cc(c1CC1=NCCN1)C)C(C)(C)C	xylometazoline, Novartis	7.15519
COc1ccccc1N1CCN(CC1)CC1CN=c2n1c(SC)nc1c2cccc1	DL 017	7.15465
CSc1nc(=O)c2c([nH]1)c(c[nH]2)Cc1cccnc1		7.15443
CCN1CCC(C1)CN1c2ccccc2Sc2c1cccc2		7.14785
CCCCc1oc2c(c1C(=O)c1ccc(cc1)OCCCN(CCCC)CCCC)cc(cc2)NS(=O)(=O)C	dronedarone hydrochloride	7.14594
CNCCSC1=Cc2ccccc2Oc2c1cc(F)cc2	fluradoline	7.1065
CCCCCn1cc(c2c1cccc2)c1scc(n1)CN(C(C)C)CCOC	PTI-2 (hydrochloride)	7.10539
NCCC(c1cccc(c1)OCC1CCCCC1)O	Emixustat hydrochloride	7.09637
OC(=O)C(c1ccc2c(c1)Cc1c(O2)nccc1)C	pranoprofen	7.08423
CCOc1ccc2c(c1C(=O)N[C@@H]1C(=O)N3[C@@H]1SC([C@@H]3C(=O)O)(C)C)cccc2	Nafcillin sodium	7.08309
CCOC(=O)C(Cc1cc(I)c(c(c1)I)Oc1cc(I)c(c(c1)I)O)(N)C	etiroxate	7.07809
COC(=O)[C@@H]1C[C@H](OC(=O)C)C(=O)[C@H]2[C@@]1(C)CC[C@@H]1[C@]2(C)C[C@H](OC1=O)c1cocc1	Salvinorin A	7.06237
CO[C@H]1[C@H](OC(=O)C)[C@H](O[C@H]2CC[C@]3([C@@H](C2)CC[C@@H]2[C@@H]3CC[C@]3([C@]2(O)CC[C@@H]3C2=CC(=O)OC2)C)C)O[C@H]([C@@H]1O)C	CERBERIN	7.05137
Clc1ccc(cc1)OC(C(=O)OCCn1cnc2c1c(=O)n(C)c(=O)n2C)(C)C	Etofilline clofibrate	7.04909
ONC(=O)CCCCCCNC(=O)c1cnc(nc1)N(c1ccccc1)c1ccccc1	ACY-1215	7.03543
CN(C1CCc2c1cccc2)Cc1ccc(cc1)C(F)(F)F		7.02503
Nc1nc(C)c(c(n1)N)C1CCCCC1		7.00326
CC1CCCC(N1CCCC(c1ccccn1)(c1ccccc1)O)C	PIRMENOL	7.00206
NCCCC[C@@H](C(=O)N[C@H](C(=O)N[C@H](C(=O)N[C@H](C(=O)N[C@H](C(=O)N[C@H](C(=O)N[C@H](C(=O)N[C@H](C(=O)N[C@H](C(=O)N[C@H](C(=O)N[C@H](C(=O)N[C@H](C(=O)N[C@H](C(=O)N[C@H](C(=O)N[C@H](C(=O)N[C@H](C(=O)NC(C(=O)N[C@H](C(=O)N[C@H](C(=O)N[C@H](C(=O)N[C@H](C(=O)N[C@H](C(=O)N)C)[C@H](O)C)Cc1cncn1)CC(C)C)CCCCN)(C)C)CC(C)C)CC(C)C)CCCCN)CCC(=O)O)CC(C)C)CC(C)C)CCC(=O)O)CCCNC(=N)N)CCCNC(=N)N)CCCNC(=N)N)CC(C)C)C…	Abaloparatide	6.995
OCC(CO)O	GLYCERIN	6.99397
O=C1OCC(=C1)[C@H]1CC[C@]2([C@]1(C)CC[C@H]1[C@H]2CC[C@H]2[C@]1(C)CC[C@@H](C2)O[C@H]1C[C@H](O)[C@@H]([C@H](O1)C)O[C@H]1C[C@H](O)[C@@H]([C@H](O1)C)O[C@H]1C[C@H](O)[C@@H]([C@H](O1)C)O)O	DIGITOXIN	6.98814
NCCC(=O)N1CCCC2(C1)Cc1ccccc1CN2C(=O)Cc1ccc(cc1)OC		6.97944
Oc1ccc(cc1)CCN[C@H]([C@@H](c1ccc(cc1)O)O)C	ritodrine	6.95444
COc1ccc(cc1)Nc1ccn(n1)c1ccccc1	N-(4-Methoxyphenyl)-1-phenyl-1H-pyrazol-3-amine	6.95257
CN(CCC1CCc2c(C1)ccc(c2)OCc1ccc(cc1)c1ccccc1)C	TAK-070	6.91395
Fc1ccc(cc1)OC[C@@H]1CC[C@H](O1)C#CCCN(C(=O)N)O	PEP-03	6.90701
COc1cc(ccc1Nc1nc2n(n1)ccc(c2)c1ccc(cc1)NC(=O)C(c1ccc(cc1)F)C)S(=O)(=O)C	BAY-1161909	6.87936
CCOC(=O)Nc1ccc(cc1)SCC1COC(O1)(Cn1cncc1)c1ccc(cc1)OC	ERBULOZOLE	6.85724
CC1=NN(C(=O)/C/1=N/Nc1cccc(c1O)c1cccc(c1)c1nnn[nH]1)c1ccc(c(c1)C)C	TOTROMBOPAG	6.84514
COc1c(OC)ccc2c1c[n+](C)c1c2ccc2c1cc1OCOc1c2	chelerythrine	6.84433
CN1CCN(CC1)c1nc(Sc2ccc(cc2)NC(=O)C2CC2)nc(c1)Nc1n[nH]c(c1)C	Tozasertib	6.84387
Clc1ccc(cc1)Cn1c(C)nc2c1cccc2	CHLORMIDAZOLE	6.83237
N#CC1=C(N)Oc2c(C1c1cc(Br)c(c(c1)OC)OC)ccc(c2)N(C)C	MX-58151	6.82503
CCCN1CCCC21CN(Cc1c(C2)cccc1)C(=O)CC		6.82432
OCCN(c1c(I)c(C(=O)NCC(CO)O)c(c(c1I)C(=O)NCC(CO)O)I)C(=O)CO	ioversol	6.8215
CC([C@H](N(C(=O)[C@H](C(C)(C)C)NC(=O)[C@H]1CCCCN1C(C)C)C)/C=C(/C(=O)O)\C)C	E-7974	6.80648
CN1CCC(=C2c3ccccc3CC(=O)c3c2ccs3)CC1	KETOTIFEN FUMARATE	6.79853
CCCN(C(Cc1ccc(cc1)S(=O)(=O)C)C)CCCCN1CCNCCC1=O	PSD-506	6.78341
CCC(C(n1cncn1)c1ccc(cc1)Nc1nc2c(s1)cccc2)CC	Talarozole	6.77565
O=C(c1ccccc1)NC1CCN(CC1)Cc1cccc(c1)c1ccc(c(c1)F)F		6.77375
O=C(N1CCC(CC1)N1Cc2c(C1=O)cccc2)C1CCN(CC1)C(=O)c1ccccc1C		6.76535
COc1cc2CCN(CCc2cc1S(=O)(=O)c1ccc(cc1)OCc1ccc(cc1)Cl)C	SB-737050-A	6.76508
OC(=O)CO/N=C/C(Cc1c(SC(C)(C)C)c2c(n1Cc1ccc(cc1)Cl)ccc(c2)OCc1ccc2c(n1)cccc2)(C)C	A 81834	6.74851
Fc1ccccc1C(=O)N1CCC(CC1)n1c(=O)[nH]c2c1cccc2		6.73159
Clc1ccc(cc1)c1cc(cc(c1O)CNC(C)(C)C)C(C)(C)C	WR-194965	6.71776
NCCCC(CC(=O)NC1CNC(=O)C(NC(=O)/C(=C/NC(=O)N)/NC(=O)C(NC(=O)C(NC1=O)CO)CO)C1CC(O)NC(=N1)N)N		6.69813
Brc1ccc(c(c1N=C1NCCN1)C)N(C)C	ESR-1150-CL	6.69398
CO/N=C(/C(=O)NC1C(=O)N2C1SCC(=C2C(=O)O)COC(=O)N)\c1ccco1	cefuroxime	6.68822
CCC(c1ccccc1)CC1COC(=N1)N	RO-5256390	6.6849
OC(COc1ccc(cc1)CC(=O)OCCC12CC3CC(C2)CC(C1)C3)CNC(C)C	Adaprolol	6.66289
CCC1(C(=O)NC(=O)N(C1=O)C)c1ccccc1	Methylphenobarbital	6.655
COC1C(O)[C@@H](O[C@H]2CC[C@]3([C@@H](C2)CC[C@@H]2[C@@H]3CC[C@]3([C@]2(O)CC[C@@H]3C2=CC(=O)OC2)C)C=O)OC([C@H]1O)C	Peruvoside	6.65173
Oc1ccc(cc1)C1(OS(=O)(=O)c2c1cccc2)c1ccc(cc1)O	PHENOLSULFONPHTHALEIN	6.6422
OC[C@@H](Cn1c2cc(F)c(cc2cc1C(CO)(C)C)NC(=O)C1(CC1)c1ccc2c(c1)OC(O2)(F)F)O	VX-661	6.63849
CCN1CCCC21CN(Cc1c(C2)cccc1)C(=O)Cc1ccccc1		6.63551
CN(CCCC(=O)N1Cc2ccccc2OC2(C1)CCN(CC2)C(=O)C)C		6.62368
Clc1ccccc1CNc1ccc(nn1)n1cncc1	MFT 279	6.61028
CCN(CC(=O)Nc1c(C)cccc1C)CC		6.60626
CCCCc1nc(cn1c1ccc(cc1)Oc1ccc(cc1)Cl)c1ccc(cc1)OCCCN(CC)CC	Azeliragon	6.60163
OCC(=O)Nc1ccc(cc1)[As](=O)([O-])[O-]		6.5991
N1CC(C1)Oc1ccccc1c1onc(n1)c1ccccc1		6.58059
CC(C(C)(C)C)N/C(=N/C#N)/Nc1ccncc1	Pinacidil monohydrate	6.56467
COc1cccc(c1)c1ccc(cc1)C(=O)N1CCC(CC1)C(=O)NCc1ccc2c(c1)OCO2		6.54612
OC[C@H]1O[C@H]([C@H](C1O)O)n1cnc2c1cc(Cl)c(c2)Cl		6.54441
CC1c2ccccc2CCN1c1ssc(=O)c1Cl	RP 54745	6.53873
C/C(=C\C=C\C=C(\C=C\C=C(\C=C\C=C(\CCC=C(C)C)/C)/C)/C)/C=C/C=C(/C=C/C=C(/CCC=C(C)C)\C)\C	Lycopene	6.50869
CN1CCN(C(=O)C1c1ccc(cc1)Nc1nc(cn(c1=O)C)c1cccc(c1C)NC(=O)c1cc2c(s1)CCCC2)C	GDC-0834	6.50098
O=C(NCc1ccccc1)CCNNC(=O)c1ccncc1	N-benzyl-3-(2-isonicotinoylhydrazino)propanamide	6.49044
COc1ccc2c(c1)c(O)c(cn2)C(=O)NC1=NCCS1	RU-43028	6.47986
CCCCc1nnc(n1c1ccccc1)S		6.47108
COCCN1CCC(CC1)N(C(=O)Cn1c(SCc2cccc(c2F)F)cc(=O)c2c1cccc2)Cc1ccc(cc1)c1ccc(cc1)C(F)(F)F	RILAPLADIB	6.46274
Oc1nc(c(s1)Cc1ccc2c(c1)ccc(c2)OCc1ccccc1F)O	netoglitazone	6.45622
OC(=O)/C=C/c1cc(F)c(c(c1)F)[C@H]1N(CC(F)(C)C)[C@H](C)Cc2c1[nH]c1c2cccc1	AZD-9496	6.44833
CC(COC(=O)c1ccc(cc1)N)C	ISOBUTAMBEN	6.44471
OCC1OC(C(C1O)O)n1ccc(=O)[nH]c1=O	uridine, RepliGen	6.44174
Clc1ccc(cc1/C=N/OC(C)(C)C)NC(=S)c1ccoc1C	UC 10	6.44118
CCCC(=O)OCC(=O)[C@@]1(O)CC[C@@H]2[C@]1(C)C[C@H](O)[C@H]1[C@H]2CCC2=CC(=O)CC[C@]12C	HYDROCORTISONE BUTYRATE	6.43609
NC[C@@](c1ccc(cc1)Cl)(c1ccc(cc1)c1c[nH]nc1)O	AT-13148	6.41911
OC(=O)CN1C(=O)[C@H](CCc2c1cccc2)NC(=O)C1(CCCC1)CC(C(=O)O)CCc1ccccc1	KC-12615	6.41544
NCCCC[C@@H](C(=O)N)NC(=O)[C@H]([C@H](CC)C)NC(=O)[C@@H](NC(=O)[C@@H](NC(=O)[C@@H](NC(=O)[C@@H]1CCCN1C(=O)[C@@H](NC(=O)[C@@H]1CCCN1C(=O)[C@@H]1CCCN1C(=O)[C@@H]1CCCN1C(=O)C)Cc1ncnc1)Cc1ncnc1)C)CCCNC(=N)N	VAL-201	6.40618
CCOC(=O)OC(OC(=O)[C@@H]1N2C(=O)[C@H]([C@H]2SC1(C)C)NC(=O)[C@@H](c1ccccc1)N)C	BACAMPICILLIN HYDROCHLORIDE	6.40427
CCCCCNC(=N)Nc1scc(n1)c1c[nH]c(n1)C	CP 66948	6.39686
N#Cc1ccc(cc1)CN1CCC(CC1)N1Cc2c(C1=O)cccc2		6.39263
COc1cc(/C=C\c2ccc(c(c2)N)OC)cc(c1OC)OC	RPR-258063A	6.39127
OCCN(S(=O)(=O)C)c1c(Cl)c(Cl)cc2c1[nH]c(=O)c(=O)[nH]2	UK-212189	6.38645
C=C[C@@](/C=C/c1ccc(cc1)O)(CCC=C(C)C)C	Drupanol	6.3862
Clc1cc(NCc2cccs2)c(cc1S(=O)(=O)N)c1nnn[nH]1	azosemide	6.38567
O=C([C@@H]1CCCN1)Nc1ccc(cc1)c1ccnc(n1)Nc1ccc(cc1)N1CCOCC1	XL-019	6.38247
OCCN1C(=O)CN2C(c3c1ccc(c3)Cl)(OCC2)c1ccccc1F	FLUTAZOLAM	6.3777
N#Cc1ccc2c(c1)[C@@H](N1CCCC1=O)[C@@H](C(O2)(C)C)O	Cromakalim	6.36005
N=C(NC(=N)NP(=O)(O)O)NCc1ccccc1	BENFOSFORMIN	6.35337
CCOc1ccc(cc1)OCC(=O)C1CCCC1		6.35125
Clc1cc(Cl)cc(c1)c1nc2c(o1)cc(cc2)C(=O)O	FX-1006A	6.33666
CCN(CCN=S(=O)(c1ccccc1)c1ccccc1)CC	SULOXIFEN	6.33419
NC(=O)CN1Cc2ccccc2OC1=O	caroxazone	6.32459
CC[C@H]1CN2CC[C@H]1C[C@H]2[C@@H](c1ccnc2c1cc(OC)cc2)O	HYDROQUINIDINE	6.32012
FCSC(=O)[C@@]1(OC(=O)CC)[C@H](C)C[C@@H]2[C@]1(C)C[C@H](O)[C@]1([C@H]2C[C@@H](C2=CC(=O)C=C[C@]12C)F)F	PROPIONATE	6.30433
N#CC[C@H](OC(=O)NC(c1cccc(c1)NC(=O)Nc1ccc(c(c1)OC)C#N)C)CC	VX 148	6.30107
CCN(CC(COC(=O)c1ccc(o1)c1ccc(cc1)C(F)(F)F)(C)C)CC	F 721	6.29193
CC[C@H]1N(C2CCCC2)c2nc(ncc2N(C1=O)C)Nc1ccc(cc1OC)C(=O)NC1CCN(CC1)C	BI-2536	6.28403
Clc1ccc2c(c1)C(=NCC(=O)N2CC1CC1)c1ccccc1	Prazepam	6.28302
NC[C@@H](NC(=O)c1oc(c(c1)c1c(Cl)cnn1C)Cl)Cc1ccc(c(c1)F)F	Uprosertib	6.27724
O=C1Nc2c(Cl)ccc(c2C2(N1)CCCCC2)O[C@@H]1C[C@H](C1)C(=O)O	PF-3557156	6.27508
ONC(=O)CN1CCC(CC1)(C#N)c1ccc(c(c1)OC1CCCC1)OC	ONO-6126	6.27073
CCC1(C(=O)NC(=O)NC1=O)c1ccccc1	Barbexaclone	6.25439
Nc1cnccc1N	amifampridine phosphate	6.25403
Cc1ccc(cc1)c1c(c2ccncc2)c(nc2c1cn[nH]2)c1ccc(cc1)F		6.25185
OC[C@@H](C(=O)N[C@H](C(=O)NCC(=O)N[C@H](C(=O)N[C@H](C(=O)N1CCC[C@H]1C(=O)NCC(=O)N)CCCNC(=N)N)CC(C)C)Cc1ccc(cc1)O)NC(=O)[C@H](Cc1c[nH]c2c1cccc2)NC(=O)[C@@H](NC(=O)[C@@H]1CCC(=O)N1)Cc1nc[nH]c1	Gonadorelin	6.23214
O=C(OCc1cccnc1)NCc1ccc(cc1)C(=O)Nc1ccccc1N	Entinostat (MS-275, SNDX-275)	6.22405
C[C@H]1CCCC[C@]1(N1CCCCC1)c1cccs1	GACYCLIDINE	6.22327
N#Cc1ccc(cc1)C(n1cncn1)(c1ccc(cc1)C#N)F	CGS-47645	6.21371
OC(=O)COCCN1CCN(CC1)C(c1ccc(cc1)F)c1ccc(cc1)F	Efletirizine	6.19788
CSCC[C@@H](C(=O)OC)NC(=O)c1ccc(cc1c1ccccc1C)CNCc1c[nH]cn1	FTI 2153	6.19371
Cc1cncc(c1)CN1CCC(=C2c3ccc(cc3CCc3c2nccc3)Cl)CC1	rupatadine	6.18704
CCCc1c(OCCCS(=O)(=O)c2ccc(cc2)C(=O)CCC(=O)O)ccc(c1O)C(=O)C	L 648051	6.18486
O=C(N1CCCCC1)C=CC=Cc1ccc2c(c1)OCO2	(2E,4E)-5-(1,3-dioxaindan-5-yl)-1-(piperidin-1-yl)penta-2,4-dien-1-one	6.17658
N#Cc1cnc(s1)c1ccc(cc1F)N1C[C@@H](OC1=O)CNC(=O)C	PNU 176798	6.1689
CC(C(=O)NCC(=O)O)S	tiopronin	6.15602
COc1cccc(c1)C1(CCCC=C1)CCN(C)C	Ro-12-9150	6.14784
COc1ccc(cc1)Oc1c(cc(cc1S(=O)(=O)N)C(=O)O)n1cccc1	H-100	6.1373
N#Cc1ccc(cc1)Cc1cc(c2n1cccc2)C(=O)C(=O)Nc1snc(c1)C	STA 5312	6.11827
Clc1ccc(cc1)Cn1c(CC(C(=O)O)(C)C)c(c2c1ccc(c2)OCc1ccc2c(n1)cccc2)SC(C)(C)C	quiflapon	6.11777
CC(C(Cc1ccc(c(c1)O)O)C)Cc1ccc(c(c1)O)O	Nordihydroguaiaretic acid	6.11731
Cc1occc(=O)c1O[V](=O)Oc1c(=O)ccoc1C	VO(ma)2	6.0805
N#Cc1[nH]c2c(c1)c(OCC(CN1CCN(CC1)C(c1ccccc1)c1ccccc1)O)ccc2	DPI-201106	6.07605
CCCCCOc1c(OC)ccc2c1nc(O)c(c2)C(=O)NCc1ccc2c(c1)OCO2	JTE-907	6.06408
NC(=S)N/N=C/c1ccncc1	2016-03-02: Perchlozone	6.04527
CO[C@@H]1/C=C/C=C(\C)/Cc2cc(OC)c(c(c2)N(C(=O)C[C@@H]([C@]2([C@H]([C@@H]([C@@H]3C[C@@]1(O)NC(=O)O3)C)O2)C)OC(=O)C(C)C)C)Cl	Ansamitocin P3	6.04243
Fc1ccc(c(c1)C(F)(F)F)C(=O)Nc1ccc2c(c1)B(O)OC2(C)C	SCYX-7158	6.02898
Clc1cccc2c1nc(cc2)Nc1ccc(cc1)OC(F)(F)F	ABX-464	6.02786
COc1cc(/C=C\2/C(=C(c3c2ccc(c3)F)CC(=O)NCc2ccccc2)C)cc(c1OC)OC	CP 248	6.01844
CNCC(c1cc(OC)c(c(c1)OC)O)O	DIMETOFRINE	6.00761
NC(=NC(=O)c1ccc2c(c1)N(C(C)C)C(=O)C(O2)(C)C)N		5.9976
Ic1cc(c2c(c1O)nccc2)S(=O)(=O)O	8-HYDROXY-7-IODO-5-QUINOLINESULFONIC ACID	5.98411
COC(=O)[C@@]1(O)C[C@]2(CC)CCCN3[C@@H]2c2n1c1ccccc1c2CC3	VINCAMINE	5.98015
Fc1ccc2c(c1)C(OCC1CC1)(c1c(N2)[n+]([O-])ccc1)C(F)(F)F	DPC-A78277	5.97364
O=Cc1ccc(cc1)N1CCN(CC1=O)C(=O)c1ccc(cc1)NC(=O)C		5.97106
OC(=O)c1ccccc1NCCc1ccccc1	enfenamic acid	5.95287
CO[C@@H]1C[C@@H](CC[C@@H]1n1cnnn1)C[C@H]([C@H]1OC(=O)[C@@H]2CCCCN2C(=O)C(=O)[C@]2(O)O[C@@H](CC[C@H]2C)C[C@H](OC)/C(=C/C=C/C=C/[C@H](C[C@H](C(=O)[C@@H]([C@@H](/C(=C/[C@H](C(=O)C1)C)/C)O)OC)C)C)/C)C	Zotarolimus	5.94919
CNCCCOc1cc(F)c(c(c1)F)c1c(Cl)nc2n(c1N[C@H](C(F)(F)F)C)ncn2	cevipabulin fumarate	5.94187
O=C1C=C[C@]2(C(=C1)CCC1C2(F)C(O)C[C@]2(C1CC(C2(O)C(=O)COC(=O)c1cccc(c1)S(=O)(=O)[O-])C)C)C		5.93808
CCP(=[Au]S[C@@H]1O[C@H](COC(=O)C)[C@H]([C@@H]([C@H]1OC(=O)C)OC(=O)C)OC(=O)C)(CC)CC	Auranofin	5.93395
COC(=O)Nc1nc2c([nH]1)cc(cc2)C(=O)c1ccc(cc1)F	Flubendazole	5.92695
COc1cc(CCc2ccc(cc2)c2cc3ccccc3c3=NCCn23)cc(c1OC)OC	SDZ 64412	5.92196
OCC(c1ccccc1)NC(=O)C(c1cccc(c1)Cn1c2ccccc2c2c1nc(C)cc2C)C1CCCC1	AEGR 427 IMPLITAPIDE	5.90892
CCc1cc(nc(n1)N)N1CCC(C1)N		5.89132
CCCC(=O)Nc1ccc(c(c1)C(=O)C)OCC(CNC(C)C)O		5.88522
CN(CCCC(=O)N1CCCC2(C1)Cc1ccccc1CN2C(=O)C)C		5.87498
O=C(C(C)(C)C)NCCCC(=O)O	pivagabine	5.86713
CN(CCCn1nc(c2c1ccc(c2)C)c1ccccc1)C	FS-32	5.86035
O=C(NS(=O)(=O)c1ccccc1)Nc1ccc(c(c1)C)C(C)C		5.85271
OC(=O)c1ccc2c(c1)n1CCOc3c(c1c2C1CCCCC1)ccc(c3)OCc1ccccc1	JTK-652	5.84779
O=Cc1cnc2n1CCc1c(C2=C2CCN(CC2)C)cccc1	alcaftadine	5.84681
N#Cc1cc(c2ccc3c(n2)N(C)C(=O)CO3)c([nH]c1=O)C	RG-12152	5.84293
CO/N=C(/c1csc(n1)N)\C(=O)N[C@@H]1C(=O)N2[C@@H]1S(=O)CC(=C2C(=O)O)COC(=O)C	CEFTIOXIDE	5.84161
COc1cc2N(C)[C@@H]3[C@@]4(c2cc1[C@]1(C[C@@H]2CN(CCc5c1[nH]c1c5cccc1)C[C@](C2)(O)CC)C(=O)OC)CCN1[C@H]4[C@@]([C@H]([C@]3(O)C(=O)N)O)(CC)C=CC1	VINDESINE SULFATE	5.8254
O[C@H]1C[C@@H](C[C@H]1COS(=O)(=O)N)n1ccc2c1ncnc2N[C@H]1CCc2c1cccc2	Pevonedistat	5.80786
Clc1ccc(cc1)C1=C(CCC(C1)(C)C)CN1CCN(CC1)c1ccc(c(c1)Oc1cnc2c(c1)cc[nH]2)C(=O)NS(=O)(=O)c1ccc(c(c1)[N+](=O)[O-])NCC1CCOCC1	chronic lymphocytic leukaemia therapy, AbbVie	5.80247
CN(CCOC(c1ccccc1)c1ccccc1)C		5.80009
CCC(=O)[C@@]1(C)CC[C@@H]2[C@]1(C)CCC1=C3CCC(=O)C=C3CC[C@@H]21	promegestone	5.79741
O=C(Oc1cccc(c1)c1cccc(c1)C(=O)N)NC1CCCCC1	URB597	5.78948
NCCCC[C@@H]1NC(=O)[C@@H](NC(=O)CNC(=O)[C@@H]2CSSC[C@H](NC(=O)[C@@H](NC1=O)CC(C)C)C(=O)N[C@@H](Cc1ncnc1)C(=O)N1C[C@@H](C[C@H]1C(=O)N[C@@H](CSSC[C@@H](C(=O)N2)NC(=O)[C@H](C(C)C)NC(=O)CNC(=O)[C@@H]1CCC(=O)N1)C(=O)O)O)Cc1ccc(cc1)O	XEN-2174	5.78441
OC(=O)c1ccccc1Nc1cccc(c1)OCc1ccc2c(n1)cccc2	SR-2640	5.78124
Cc1ccc(cc1)c1cc(nn1c1ccc(cc1)S(=O)(=O)N)C(F)(F)F	Celecoxib169590-42-5	5.77853
OC(=O)C(Oc1ccc(cc1C)SCc1sc(nc1C)c1ccc(cc1F)C(F)(F)F)(C)C		5.77653
CCCc1cc2c(s1)CN[C@H]1[C@H]2c2cc(OC(=O)C)c(cc2CC1)OC(=O)C	ADROGOLIDE	5.76513
CCOC(=O)Cc1c2CCC(Cn2c2c1cccc2F)OS(=O)(=O)C	MK-1029	5.76474
O=C(N1CCC(CC1)N1Cc2c(C1=O)cccc2)C1CCN(CC1)C(=O)C(C)(C)C		5.76365
CCn1cc(C(=O)O)c(=O)c2c1cc1OCOc1c2	OXOLINIC ACID	5.75536
NCCN1CCN(CC1)c1nnc(c(c1)c1ccccc1)C(F)(F)F		5.74081
CC(=CCN(c1ccc(cc1)CCC(C)(C)C)C1CCN(CC1)Cc1ccc(cc1)N(C)C)C	PD 0204318	5.72905
O=C(c1ccc(cc1)[C@H](N)C)Nc1ccnc2c1cc[nH]2	Y-39983	5.70917
OCC[C@H]1CCCCN1C(=O)/C=C/c1c(nn2c1cccc2)c1ccccc1	FR-453	5.69835
O=C(C(c1ccc2c(c1)Cc1c(O2)nc(cc1)C)C)OCC(=O)N(C)C	TILNOPROFEN ARBAMEL	5.69608
CC(N1CC2CCC(C1)N2C(=O)C)C		5.68103
n1ccc(cc1)c1nc2c(n1)cc(cc2)c1ccc2c(c1)nc(n2)c1ccncc1	Ridinilazole	5.66754
CCCCCCCCCCCCCCC1(CO1)C(=O)OC	METHYL PALMOXIRATE	5.6578
CCCCCCCCCCCCCCCCOP(=O)(OCC[N+](C)(C)C)O	Miltefosin	5.65237
O=Cc1ccc(cc1)N1CCN(CC1=O)C(=O)N1CCCC1		5.64734
CN(CCCn1c(=O)c2ccccc2c2c1cccc2)C	FANTRIDONE	5.64335
CO[C@H]1/C=C\O[C@@]2(C)Oc3c(C2=O)c2C4=NC5(NC4=C(C(=O)c2c(c3C)O)NC(=O)/C(=C\C=C/[C@@H]([C@@H]([C@H](C([C@H]([C@@H]([C@@H]1C)O)C)O)C)O)C)/C)CCN(CC5)C(CC)C	LM 565	5.63009
COC(c1ccc(cc1)[N+](=O)[O-])CN1CCC(CC1)C(=O)c1ccc(cc1)F		5.62878
Cc1cc(Cl)c(c(c1)Cl)OCCOc1ccc(cc1)C1=C(C2NC(C1)CNC2)C(=O)N(C1CC1)Cc1cccc(c1C)C	MK-8141	5.6206
CN[C@@H]1[C@H](O[C@@H]2[C@@H]([C@@H]1O)O[C@@H]([C@@H](C2)N)O[C@@H]1[C@@H](N)C[C@H]([C@@H]([C@H]1O)O)N)O[C@H]1O[C@H](CO)[C@H]([C@@H]([C@H]1O)O)N	Apramycin	5.61742
OC(=O)CCCSc1nc2c(n1Cc1csc3c1c(C)ccc3)cccc2	TPC-806	5.60494
CN1CCN(CC1)CC/C=C\1/c2ccccc2Sc2c1cc(cc2)S(=O)(=O)N(C)C	Tiotixene	5.60012
COC(=O)c1c2C3CN(C)CCN3c3c(Cn2c2c1cccc2)cccc3	SERAZEPINE	5.59758
OCCNC(=O)[C@H](Cc1c[nH]c2c1cccc2)NC(=O)[C@H](NC(=O)[C@H](Cc1c[nH]c2c1cccc2)NC(=O)[C@H](NC(=O)[C@H](Cc1c[nH]c2c1cccc2)NC(=O)[C@H](NC(=O)[C@H](Cc1c[nH]c2c1cccc2)NC(=O)[C@@H](C(C)C)NC(=O)[C@H](C(C)C)NC(=O)[C@@H](C(C)C)NC(=O)[C@@H](NC(=O)[C@H](NC(=O)[C@@H](NC(=O)CNC(=O)[C@H](C(C)C)NC=O)C)CC(C)C)C)CC(C)C)CC(C)C)CC(C)C	GRAMICIDIN	5.59544
COCCN1CCN(CC1)CC1CCN(C1=O)c1ccc(cc1)Cl	MS-377	5.58434
CCCNCCc1ccccc1		5.55708
COc1ccc2c(c1)cccc2C1COC(OC1)CCCNC(=O)C	SL-90.0571	5.55506
O=C(c1cn(c2c1cc(O)cc2)Cc1ccc(cc1)F)C(=O)Nc1c(Cl)cncc1Cl	2016-06-07: GW 842470	5.55411
COCC(n1nnc2c1cc(C)nc2Nc1c(C)cc(cc1Cl)C)COC	DMP 695	5.55376
OC[C@H]([C@@H](c1ccc(cc1)S(=O)(=O)C)O)NC(=O)C(Cl)Cl	Thiamphenicol	5.54973
COc1ncc(c(n1)OC)c1nc2c(n1C(C)C)[C@H](N(C2=O)c1cc(Cl)cn(c1=O)C)c1ccc(cc1)Cl	HDM-201	5.54797
COc1ccc2c(c1)c(CCN(C)C)cn2S(=O)(=O)c1ccccc1	Integrity 295303	5.54279
Nc1on[n+](n1)c1ccc(c(c1)Cl)Cl	GEA 3162	5.54087
Clc1cccc(c1)COc1ccccc1C(=C)n1cncc1	croconazole	5.53414
Clc1ccc(cc1)n1nc2c(cc1=O)CCS(=O)c1c2cccc1	Y-23684	5.53344
COc1cc(cc(c1O)OC)[C@H]1[C@H]2C(=O)OC[C@@H]2[C@@H](c2c1cc1OCOc1c2)O[C@@H]1O[C@@H]2CO[C@H](O[C@H]2[C@@H]([C@H]1O)O)C		5.53173
OC(=O)C1CCc2c1cc(Cl)c(c2)C1CCCCC1	clidanac	5.52867
O=C(C1CCCN(C1)c1nc2c(o1)cccn2)N1CCN(CC1)Cc1ccccc1		5.50903
CC(C[C@@H](C(=O)O)NC(=O)OCC1c2ccccc2c2c1cccc2)C	Fmoc-Leu-OH	5.50757
Fc1cc(cc(c1)F)N[C@@H](c1cc(cc2c1oc(cc2=O)N1CCOCC1)C(=O)N(C)C)C	AZD-8186	5.50005
O=C(N1CSC[C@H]1C(=O)N1CCCC1)CC1Cc2c(C1)cccc2	Z 321	5.49383
CC(NCCn1c2ccc(cc2c2c1ccc(c2)C(=O)C)C(=O)C)C	CBL-0137	5.47522
CN(CCC(=O)N1Cc2ccccc2CC2(C1)CCCCN2C)C		5.47192
Oc1ccc(c(c1)CNc1ccc(cc1)C(=O)OC12CC3CC(C2)CC(C1)C3)O	ADAPHOSTIN	5.46247
OC[C@H](c1ccccc1)C(=O)O[C@H]1C[C@H]2C[C@@H]([C@@H](C1)N2C)O	Anisodamine	5.46205
Cc1nccnc1N1CCCCC1	MODALINE	5.46054
O=C(N([C@H]1CC[C@]2(C[C@@H]1N1CCCC1)CCCO2)C)Cc1ccc(c(c1)Cl)Cl	2016-06-07: SPIRADOLINE	5.447
NC(=O)Nc1c(oc2c1ccc(c2)OS(=O)(=O)C)C(=O)c1ccc(cc1Cl)Cl	Lirimilast	5.43823
COc1cc2c(cc1C(=O)N)CC[C@@H]1[C@@H]2CC[C@]2([C@H]1CC=C2)C	ENMD-1198	5.43473
O=C(Cc1ccc(cn1)c1ccc(cc1)OCCN1CCOCC1)NCc1ccccc1	KX2-391	5.42099
O=C1CCC(C(=O)N1)N1Cc2c(C1=O)cccc2	EM 12	5.41805
N#C/C(=C(/O)\C)/C(=O)Nc1ccc(cc1)C(F)(F)F	2-cyano-3-hydroxy-n-[4-(Trifluoromethyl)phenyl]but-2-enamide	5.4108
O=Cc1ccc(cc1)N1CCN(CC1=O)C(=O)C		5.40447
Fc1ccc(cc1)C(=O)NC1CCN(CC1)Cc1cccc(c1)c1cccc(c1)C		5.40447
OC[C@H]1O[C@@]([C@H]([C@@H]1O[C@@H]1O[C@H](CO)[C@@H]([C@@H]([C@H]1O)O)O)O)(O)CO	Lactulose	5.38267
N#C/N=C(/Nc1ccncc1)\NCCCCCCOc1ccc(cc1)Cl	CHS-828	5.36691
CCCc1c(ncn2c1nc(n2)C)Cn1ccnc1c1ncccc1F	adipiplon	5.36611
Clc1ccc(cc1)[C@@](c1ccccc1)(OCC[C@H]1CCCN1C)C	Clemastine fumarate	5.36067
NCC(=O)CCC(=O)OCc1ccccc1	Aminolevulinic acid benzyl ester	5.35677
NC(=O)Cc1cnc2c(c1)ccc(c2)OCc1cccc(c1)F	HT-3951	5.3552
OC(=O)c1cc2cc(O)c(cc2c(n1)C(=O)c1ccc(c(c1)O)O)O	NBI 31772	5.35219
O=C(CNC(=O)C(Cc1ccccc1)CSC(=O)C)OCc1ccccc1	Glycine, N-[2-[(acetylthio)methyl]-1-oxo-3-phenylpropyl],phenylmethyl ester	5.35138
CCOC(=O)C1=CC2(CC)CCCN3C2c2n1c1ccccc1c2CC3	vinpocetine	5.34109
NCC1=CCC(C(O1)OC1C(N)CC(C(C1O)OC1OCC(C(C1O)NC)(C)O)N)N	pentisomicin	5.33881
CNC(CC1CCCC1)C	CYCLOPENTAMINE	5.33782
CC(CCN1CCCC21Cc1ccccc1CNC2=O)C		5.32691
N#C/C=C\1/c2cscc2C(=Nc2c1csc2)N1CCN(CC1)C	tenilapine	5.3192
Cc1cccc(c1)NC(=O)NC1N=C(C2CCCCC2)c2c(N(C1=O)C)cccc2	L-708474	5.31752
Clc1cc(OCc2ccccc2)ccc1OCc1ccccc1		5.31071
OC[C@H]1O[C@H](O[C@H]2[C@H](N)C[C@@H]([C@H]([C@@H]2O)O[C@H]2O[C@H](CN)[C@H]([C@@H]([C@H]2O)O)O)N)[C@@H]([C@H]([C@@H]1O)N)O	Kanamycin	5.30333
O=C([C@@H](C1=CCC=CC1)N)N[C@@H]1C(=O)N2[C@@H]1SCC(=C2C(=O)O)C	Cephradine	5.30288
CC(=O)Nc1ccc(cc1)OCc1cccc(c1)F		5.30032
O=N[Fe-2](C#N)(C#N)(C#N)(C#N)C#N	SODIUM NITROPRUSSIDE	5.29272
COCCCNC(=O)c1ccnc(c1)C(=O)NCCCOC	Safironil	5.28585
NCCCC(=O)OCCN1CCN(CC1)CCCN1c2ccccc2Sc2c1cc(Cl)cc2	BL-1020	5.28071
O=C(c1ccc(cc1)/C=C/c1n[nH]c2c1cccc2)N1CCNCC1	KW-2449	5.27012
Fc1ccc(c(c1)F)[C@@]1(CO[C@@H](O1)COc1ccc(cc1)N1CCN(CC1)c1ccc(cc1)N1CCN(C1=O)C(C)C)Cn1cncn1	R-126638	5.25537
Clc1ccc(cc1)c1c2OCCN(C(=O)c2nn1c1ccccc1Cl)CC(F)(F)C	PF-514273	5.24311
OCC(Nc1ccc(cc1C(=O)NCc1ccc(c(c1)OC)OC)[N+](=O)[O-])C	FR 226807	5.23565
OC(=O)CCCn1ccc2c1cccc2c1noc(n1)c1cnc(c(c1)Cl)OC(C)C	GSK-2018682	5.22998
N[Pt](Cl)(Cl)N	CISPLATIN	5.22844
CC(C1=NCCN1)Oc1c(Cl)cccc1Cl	Lofexidine hydrochloride21498-08-8	5.21992
COCCn1c(N[C@H](c2ccc(c(c2)OC)OC)CO)nc2c1c(=O)n(c(=O)n2C)C	SDZ-MKS-492	5.2185
Cc1nn(c(c1)C)CCCCCS(=O)c1nc(c([nH]1)c1ccccc1)c1ccccc1	RP 73163	5.21698
ONC(=O)C(c1ccc(cc1)CC(C)C)C	Ibuproxam	5.21684
COCC(=O)Nc1c(I)c(C(=O)NCC(CO)O)c(c(c1I)C(=O)N(CC(CO)O)C)I	peptide analogues, ResCo	5.21449
S=C(N1CCN(CC1)c1ccccn1)N/N=C\1/CCCc2c1nccc2	COTI-2-MO5	5.19639
CCNC(=O)C[C@@H]1N=C(c2ccc(cc2)Cl)c2c(n3c1nnc3C)ccc(c2)OC	GSK-525762	5.19515
CNc1ccc(c(n1)F)c1cc2c(o1)ccc(c2)O	AZD4694	5.19108
[NH3+][C@H]1C[C@@H](O[C@H]([C@H]1O)C)O[C@H]1C[C@@](O)(Cc2c1c(O)c1c(c2O)C(=O)c2c(C1=O)c(O)ccc2)C(=O)C	CARUBICIN	5.19094
CCOc1ccc(cc1)Cc1cc(ccc1Cl)[C@]12OC[C@@](O1)(CO)[C@H]([C@@H]([C@H]2O)O)O	ertugliflozin	5.18989
CC[C@@H]([C@H](C(=O)N[C@H](C(=O)N1CCC[C@@H]1C(=O)N[C@H](C(=O)O)Cc1ccccc1)Cc1[nH]cnc1)NC(=O)[C@H](NC(=O)[C@H](C(C)C)N)Cc1ccc(cc1)O)C		5.18016
COc1c2c(CCC(c3c2ccc(c(=O)c3)SC)NC(=O)C)cc(c1OC)OC	CGX-6001-B	5.16949
CC(=O)Oc1ccccc1C(=O)Nc1ncc(s1)[N+](=O)[O-]	NITAZOXANIDE	5.16633
COc1ccc2c(c1)cc([nH]2)C(=O)c1ccccc1	D-64131	5.16229
NC1CCN(C1)c1c(F)cc2c3c1oc1ccccc1n3cc(c2=O)C(=O)O	A-83669	5.15305
OC(=O)CCCN1CCC(CC1)O[C@H](c1ccccn1)c1ccc(cc1)Cl	bepotastine besilate	5.1417
OCC1C/C(=N/OC)/CN1C(=O)c1ccc(cc1)c1ccccc1C	OBE-001	5.14044
N#Cc1c(N)[nH]c(c1C)c1ccccc1F	NS-8	5.13279
FC(=C)c1sc(c(c1Br)C)CNCCCNc1cc(=O)c2c([nH]1)cccc2	bederocin	5.13029
Fc1ccc(cc1)N1CCN(CC1)CCCC(=O)NC1c2ccccc2SCc2c1cccc2	MONATEPIL	5.12807
CO[C@@H]1/C=C\C=C(\C)/Cc2cc(OC)c(c(c2)N(C(=O)C[C@@H]([C@]2([C@H]([C@@H]([C@@H]3C[C@@]1(O)NC(=O)O3)C)O2)C)OC(=O)[C@@H](N(C(=O)C)C)C)C)Cl	MAYTANSINE	5.12538
OC(=O)COc1cc(ccc1OCC(=O)O)C(=O)CNC(=O)c1cc2c(s1)CCNC2	EF-5077	5.11442
NCCC(=O)N1[Zn]OC(=O)[C@@H]1Cc1cnc[nH]1	polaprezinc	5.11364
CC(c1c(O)cc(cc1O)/C=C/c1ccccc1)C	542358 3,5-Dihydroxy-4-isopropylstilbene	5.11263
OC(=O)CCSC(c1cccc(c1)C=Cc1ccc2c(n1)cc(cc2)Cl)SCCC(=O)N(C)C	MK-571	5.11111
CN1CCc2c(C1)c1cc(C)ccc1n2CCc1ccc(nc1)C	2016-06-07: PF-1913539	5.11084
OC(=O)[C@@H](Nc1ccccc1C(=O)c1ccc(cc1)F)Cc1ccc(cc1)OCCn1c2ccccc2c2c1cccc2	Chiglitazar	5.10881
Nc1ccc(cc1)S(=O)(=O)Nc1ccnn1c1ccccc1	SULFAPHENAZOLE	5.10742
CC1NCCN(C1)c1cc2n(cc(c(=O)c2cc1F)C(=O)O)c1ccc(cc1F)F	temafloxacin	5.09805
COc1cc(CN2CCN(CC2)c2ccc(cc2)F)cc(c1OC)OC	V-51	5.09796
N#Cc1cccc(c1)S(=O)(=O)Nc1ccc(c2c1ncc2C#N)C	E-7820	5.09108
CCOCCN(C(=O)C(Cl)Cl)Cc1ccc(cc1)Oc1ccc(cc1)[N+](=O)[O-]	ETOFAMIDE	5.08744
Clc1cncc(n1)C1CN2CCC1CC2	L 689660	5.08679
CCCC(=O)OCC(=O)Nc1scc(n1)c1ccc(cc1)OC		5.08333
CNCCCCNCC1CC1C		5.08281
OCCNCc1nn2c3c1ccc(c3c(=O)c1c2c(O)ccc1O)NCCCN	KW 2170	5.08175
O=C(N1Cc2ccccc2CC2(C1)CCCCN2C)c1ccccc1		5.07905
CC(OC(=O)Nc1ccc2c(c1)[nH]c(n2)c1cscn1)C	Cambendazole	5.0648
CCCCNC(=O)Nc1c(OCCCn2cnc(c2CC)c2ccccc2)cccc1C	E-5324	5.06296
COc1ccc(cc1)/C=C/C(=O)Nc1ccc2c(c1)NC(=O)C(O2)(C)C		5.06227
CCOc1ccccc1c1nc(c([nH]1)c1ccccc1)c1ccccc1		5.05963
OC[C@H]1O[C@H]([C@H]([C@@H]1O)O)n1cnc2c1ncnc2N[C@H]1CCC[C@@H]1O		5.05755
Clc1ccc(cc1)C(=O)NCCc1ccc(cc1)OC(C(=O)O)(C)C	bezafibrate	5.05711
O=C1CC2CCCC(C1)N2C(=O)c1ccc(cc1)F		5.0554
O=C([C@@H](Cc1c[nH]c2c1cccc2)N)NC(C(=O)O)(C)C	MRZ-99030	5.05235
CCc1cc(cc2c1O[C@H](C(=C2)C(=O)O)C(F)(F)F)OC(F)(F)F	(no name)	5.04598
CN1CCC2(CC1)CC(NC(=O)Nc1cccc3c1cccc3)c1c(O2)cccc1		5.04529
COc1ccc(cc1)C(CNC(Cc1ccccc1)C)O		5.03186
CCn1c(cc2c1cc(O)cc2Cl)c1c(Cl)cc(cc1Cl)O	D-15413	5.02824
CC(Cc1ccc(cc1)C(F)(F)F)N		5.02743
CCOc1cnc(nc1)NCc1cc2c(C)nn(c2nc1N1CCOCC1)C	K-312	5.01539
COc1ccc2c(c1)[C@@H]1C[C@@]1(Cn1c2c(C2CCCCC2)c2c1cc(cc2)C(=O)NS(=O)(=O)N(C)C)C(=O)N1C2CCC1CN(C2)C	Beclabuvir	5.01444
CCCn1nc(ccc1=O)c1ccccc1		5.01417
CC(C[C@@H](C(=O)N[C@H](C(=O)N[C@H](C(=O)N1CCC[C@H]1C(=O)O)C(C)C)CC(=O)O)NC(=O)Cc1ccc(cc1)NC(=O)Nc1ccccc1C)C	BIO-1211	5.01168
Fc1cccc(c1)c1sc2c(c1)c(nnc2C(=O)N)N[C@H]1CCCNC1	Puquitinib	5.01121
O=c1[nH]c2ccc(cc2c(c1)C(F)(F)F)N1[C@H](C)CC[C@@H]1C(C(F)(F)F)O	LGD-2941	5.01037
Fc1cnc(nc1)[C@@H](Nc1ncc(c(n1)Nc1n[nH]c(c1)C)Cl)C	AZD-1480	4.99807
Cc1cccc(c1NC1=NCCCS1)C	Xylazine HCl	4.99494
O=C(c1ccsc1)NCC1CN=C(c2c(N1C)cccc2)c1ccccc1F	tifluadom	4.99459
CSc1ccc(cc1)Cc1c(O)n[nH]c1C(F)(F)F	WAY 123783	4.9937
O=C(NP(=O)(N1CC1)N1CC1)OCc1ccccc1	BENZODEPA	4.98832
CC1CCCN(C1)CC(NC(=O)c1n[nH]c2c1cccc2)C		4.97992
ClCCN(CC(=O)Oc1ccc2c(c1)CC[C@@H]1[C@@H]2CC[C@]2([C@H]1CC[C@@H]2OC(=O)C(N)C)C)CCl	ALESTRAMUSTINE	4.97855
CC[N+](CC(COCC1COc2c(O1)cccc2)O)(CC)C		4.97114
COc1ccc(cc1)CCN1CCC[C@@H]1CN1c2ccccc2OCc2c1cccc2	AJG-049	4.96292
Fc1ccc(cc1)N1CCN(CC1)CCCN1c2cccc3c2c(S1(=O)=O)ccc3	Fananserin	4.96103
COC(=O)Nc1nc2n(c1)nc(cc2)OCc1cc(OC)c(c(c1)OC)OC	1069C	4.94927
Fc1ccc(cc1)c1[nH]c(nc1c1ccc(cc1)F)S(=O)(=O)C(C(F)F)(F)F	tiflamizole	4.94695
O=C(Nc1cccc(c1Cl)F)Nc1ccc(c(c1O)S(=O)(=O)N1CCNCC1)Cl	Elubrixin tosylate	4.94146
CCC(N1Cc2cc3O[C@H](c4ccc(cc4)OCc4ccc(c(c4)Cl)Cl)C(=O)N(c3cc2C[C@H]1C(=O)NC(C(=O)O)Cc1ccc(cc1)C#N)C)c1ccccc1	analog of TTP-054	4.93528
CNS(=O)(=O)Cc1ccc2c(c1)c(cn2)C[C@H]1CCCN1C	CP 122288	4.93432
CN1CCCCC1C(OC(=O)c1c[nH]c2c1cccc2)C	N 3256	4.9244
CCN(CCCN(C1Cc2c(C1)cccc2)c1ccccc1)CC	aprindine	4.91777
CCO[C@H](C(=O)O)Cc1ccc(cc1)OCCn1c(C)ccc1c1ccc(cc1)SC	Saroglitazar	4.91559
O=C(c1ccc(cc1)Cl)N1CCC(CC1)N1CCCC1		4.90875
CCN(CCNC(=O)c1ccc(cc1)NS(=O)(=O)C)CC	Sematilide monohydrochloride monohydrate	4.90875
CO[C@@H]1C[C@H](CC[C@H]1OP(=O)(C)C)C[C@H]([C@H]1OC(=O)[C@@H]2CCCCN2C(=O)C(=O)[C@]2(O)O[C@@H](CC[C@H]2C)C[C@H](OC)/C(=C/C=C/C=C/[C@H](C[C@H](C(=O)[C@@H]([C@@H](/C(=C/[C@H](C(=O)C1)C)/C)O)OC)C)C)/C)C	Deforolimus	4.90779
FCC(=O)C(NC(=O)[C@H](C(C)C)NC(=O)OCc1ccc(cc1Cl)Cl)CC(=O)O	MX-1122	4.90654
OC(COc1cccc2c1C(=O)OC2)CNC(C)(C)C	DL-071-IT	4.90118
NC(=O)c1cnc2c(c1N[C@@H]1[C@H]3CC4C[C@@H]1C[C@@](C3)(C4)O)cc[nH]2	peficitinib	4.90042
O=C1CCc2c(N1)ccc(c2)C(CNC(CCc1ccccc1)(C)C)O	BREFONALOL	4.89587
O=C1CCC2=C3[C@H](C[C@]4([C@H]([C@@H]3CCC2=C1)CC[C@@]4(O)C(C(F)(F)F)(F)F)C)c1ccc(cc1)C(=O)C	Lonaprisan	4.88347
C#C[C@]1(O)CC[C@@H]2[C@]1(C)CC[C@H]1[C@H]2CCc2c1ccc(c2)OS(=O)(=O)C(C)C	ethinyl estradiol sulfonate	4.87766
CCC(c1nccs1)(c1cccc(c1)OCc1ccc2c(c1)cccc2)OC	ICI-211965	4.87221
CN[C@H](C(=O)NCCCC(c1ccc(cc1)F)c1ccc(cc1)F)CC(C)C	PD 176078	4.86526
OC(=O)c1ccccc1S	Thiosalicylic acid	4.86444
COC1/C=C/OC2(C)Oc3c(C2=O)c2c(O)c(/C=N/N=C/N4CCCCC4)c(c(c2c(c3C)O)O)NC(=O)/C(=C\C=C\C(C(C(C(C(C(C1C)OC(=O)C)C)O)C)O)C)/C	FCE-22250	4.86441
CC(=O)Oc1ccccc1C(=O)Nc1ncc(s1)[N+](=O)[O-]	NITAZOXANIDE	4.86267
O=C(C1CCCN1C(=O)C)N1CCC(CC1)c1ccccc1		4.85647
CC(OC(=O)c1cn(Cc2c(F)cccc2F)c2c(c1=O)c(CN(Cc1ccccc1)C)c(s2)c1ccc(cc1)NC(=O)C(C)C)C	T 98475	4.85426
CN1C(=O)CC(C1=O)c1ccccc1	Phensuximide	4.85074
OCCN(C(=O)c1ccc(cc1)C(=C1CCN(CC1)Cc1cscn1)c1cccc2c1nccc2)C	AZD-7268	4.84291
O=C1C[C@H](N1)C(=O)N[C@H](C(=O)N1CCC[C@H]1C(=O)N)Cc1ncnc1	AZETIRELIN	4.83731
CC(=O)O[C@H]1C[C@@H]2CC[C@@H]3[C@@H]([C@]2(C[C@@H]1N1CCCCC1)C)CC[C@]1([C@H]3C[C@@H]([C@@H]1OC(=O)C)[N+]1(C)CCCCC1)C	VECURONIUM BROMIDE	4.82948
C=CC[N+]1(CCCC1)[C@H]1C[C@@H]2[C@]([C@H]1OC(=O)C)(C)CC[C@H]1[C@H]2CC[C@@H]2[C@]1(C)C[C@@H]([C@H](C2)O)N1CCOCC1	Rocuronium bromide	4.82712
COc1ccc(cc1)C[C@H](NC(=O)[C@@H]1CCCN1C(=O)[C@@H](NC(=O)[C@H](Cc1cccs1)NC(=O)CNC(=O)[C@@H]1C[C@H](CN1C(=O)[C@@H]1CCCN1C(=O)[C@H](CCCNC(=N)N)N)O)CO)CN[C@H](C(=O)O)CCCNC(=N)N	LABRADIMIL	4.81628
Fc1ccc(cc1)n1cc(C(=O)O)c(=O)c2c1cc(N1CCNCC1)c(c2)F	Sarafloxacin hydrochloride	4.8126
COC(=O)c1ccccc1c1c2ccc(=N)cc2oc2c1ccc(c2)N	RHODAMINE-123	4.81089
COCCOC(=O)C(=Cc1ccc(cc1)N1CCCCC1)C#N		4.80567
C=CCN1CCc2c(CC1)nc(s2)N	talipexole	4.80327
CCn1cc(C(=O)O)c(=O)c2c1cc(cc2)c1ccncc1	ROSOXACIN	4.80194
CCN(CCOC(=O)C(c1ccccc1)(c1ccccc1)C)CC	APROFENE	4.79532
CC[C@@H]([C@H](N(C(=O)[C@H](C(C)C)NC(=O)[C@@H](N(C)C)C(C)C)C)[C@@H](CC(=O)N1CCC[C@H]1[C@@H]([C@H](C(=O)N[C@H](c1nccs1)Cc1ccccc1)C)OC)OC)C	Dolastatin 10	4.79518
NC[C@@H](NC(=O)c1sc(c(c1)c1c(Cl)cnn1C)Cl)Cc1cccc(c1)F	Afuresertib	4.79237
O=C(Nc1ccccc1N)CCCCCNC(=O)c1ccc(cc1)C	RG2833 (RGFP109)	4.78833
COc1cc(cc(c1OC)OC)C1CN=C(O1)c1ccc2c(c1)ccn2C	A 289099	4.78654
CCN(C(=O)Cc1csc(n1)NS(=O)(=O)c1cccc(c1C)Cl)CC	BVT-14225	4.78639
CCCCNC(=O)C(Cc1cnc2c1cccc2)NC(=O)c1cnc(s1)N1CCNCC1	NPT200-11	4.78616
CN(C(CSc1nc2ccccc2cc1c1ccccc1)(C)C)C	ICI-170809	4.77227
OC(c1ccccc1)CNCc1ccc(cc1)C(=O)O		4.77052
Fc1ccc(cc1)C(=O)CCCN1CCC(CC1)n1c(=S)[nH]c2c1cccc2	timiperone	4.77043
COc1cc2c(cc1OC)N[C@H]([C@H]2CCN1CCN(CC1)c1ccccc1)C	CL-77328	4.76476
NCC[C@]12CCC3(CC1=CCC1C2CC[C@]2(C1CCC12OCCO1)C)OCCO3	EDIFOLONE	4.7606
CCc1cc(OCc2ccc(cc2)c2ccccc2c2nnn[nH]2)c2c(n1)cccc2	ICI-D8731	4.75499
Cc1cccc(c1CN1CCCC21Cc1ccccc1CNC2=O)C		4.73504
C[C@@H]1CC[C@]2([C@@H]([C@H]1C)C1=CC[C@H]3[C@@]([C@@]1(CC2)C)(C)CC[C@@H]1[C@]3(C)CC[C@H]([C@]1(C)C(=O)O)O)C	beta-Boswellic acid	4.72621
CCn1cc(C(=O)O)c(=O)c2c1cc(N1CCN(CC1)C(=O)CC)c(c2)F		4.72593
OCC(=O)[C@@]1(OC(=O)c2ccccc2)[C@@H](C)C[C@@H]2[C@]1(C)C[C@H](O)[C@]1([C@H]2CCC2=CC(=O)C=C[C@]12C)F	BETAMETHASONE BENZOATE	4.71528
C=CCC1(CCCC)C(=O)NC(=O)NC1=O	IDOBUTAL	4.71291
C[S+](C[C@H]1O[C@H]([C@@H]([C@@H]1O)O)n1cnc2c1ncnc2N)CC[C@@H](C(=O)[O-])N	Ademetionine	4.71223
O=C(C1CC1)NC1CCN(CC1)c1nc2c(o1)cccn2		4.71146
Cc1nn2c(c1)ncc(c2)C(=O)N1CCCCC1		4.70975
[N-]=[N+]=N[C@H]1C[C@@H](O[C@@H]1COP(=O)(O)[O-])n1cc(C)c(=O)[nH]c1=O	Phosphonovir	4.70905
O=C([C@H](c1ccccc1)C)N1Cc2ccccc2CC2(C1)CCCN2C		4.70804
O=C1CC[C@]2(C(=C1)C=CC1C2CC[C@]2(C1CC[C@]2(O)C(=O)C)C)C		4.7047
CN(c1ccccc1)/N=N/N(c1ccccc1)C	SIMTRAZENE	4.69806
C1CCN(C1)CCN1c2ccccc2Sc2c1cccc2	PYRATHIAZINE	4.69505
COc1cc(/C=C/C(=O)CC(=O)C)ccc1O	YPE-01	4.69118
OC(CN1CCN(CC1)C(c1ccc(cc1)F)c1ccc(cc1)F)CSc1ncnc2c1nc[nH]2		4.68609
CCOc1noc2c1ccc(c2)OCCC1CCN(CC1)c1ccc(nn1)C	Vapendavir	4.68572
C1CCN(CC1)CCOc1cccc(c1)c1n[nH]c2c1cc(cc2)c1[nH]ncn1	JNK-401	4.67941
NCCc1c[nH]c2c1cc(OCC(=O)N1CCN(CC1)c1ccc(cc1)C#N)cc2	Donitriptan monohydrochloride	4.6736
OC(=O)CC1Sc2ccccc2N(C1=O)Cc1sc2c(n1)c(F)c(cc2F)F	SPR 210	4.65749
OC[C@@H](C(=O)N[C@H](C(=O)N[C@H](C(=O)N)CC(=O)N)CS)NC(=O)[C@@H](NC(=O)[C@@H]1CCCN1C(=O)C)Cc1nc[nH]c1	Ac-PHSCN-NH2	4.65354
Cc1cc(Nc2ccc(nc2)C(F)(F)F)n2c(n1)nc(n2)C(F)(F)C	DSM421	4.65227
OC(=O)[C@@H](CSCCCC/C=C(/C(=O)O)\NC(=O)[C@@H]1CC1(C)C)N	Cilastatin sodium	4.65144
CCN1CCCCC21CN(Cc1c(C2)cccc1)C(=O)C1CCN(CC1)C		4.6423
O=C(c1sccc1S(=O)(=O)Nc1onc(c1Cl)C)Cc1cc2OCOc2cc1C	Sitaxentan sodium	4.64059
OCC(C(=O)NC(C(=O)NC(C(=O)N)CCC(=O)N)C(C)C)NC(=O)C(NC(=O)C(Cc1ccccc1)NC(=O)CC1CCCCC1)CCCNC(=N)N		4.63805
C1CN=C(N1)Nc1cccc2c1CCC2	INDANAZOLINE	4.63405
CN1CCC(=C2c3ccccc3CCc3c2nccc3)CC1	Azatadine maleate	4.63098
Fc1ccc2c(c1)nc(cc2)COc1ccc(cc1)CC(C(=O)O)NC(=O)c1ccc2c(n1)cccc2	CR-3465	4.62786
CCNCc1cc(c(c(c1)C(C)(C)C)O)C(C)(C)C	LY 231617	4.62634
ClC(Cl)Cl	CHLOROFORM	4.62153
O[C@H]1C[C@H]2C([C@@]1(CC2)CS(=O)(=O)N(C1CCCCC1)C1CCCCC1)(C)C	MT-103	4.61758
[O-][N+](=O)c1ccc2c(c1)N(CC(O2)(C)C)c1cccc[n+]1[O-]	YM 934	4.6086
Fc1ccc(cc1)Cc1nn(C2CCCN(CC2)CCc2ccccc2)c(=O)c2c1cccc2	FLEZELASTINE	4.60072
COc1cc(N)c(cc1C(=O)NC1CCN(CC1)Cc1ccc(cc1)F)Cl		4.59679
OCC(CNC(=O)c1c(I)c(N(C(=O)C)CC(CN(c2c(I)c(C(=O)NCC(CO)O)c(c(c2I)C(=O)NCC(CO)O)I)C(=O)C)O)c(c(c1I)C(=O)NCC(CO)O)I)O	IODIXANOL	4.59679
CCN(S(=O)(=O)c1ccc(cc1)NS(=O)(=O)C)CC		4.59487
CCCCCCCO[C@H]1[C@@H](CCNCc2ccccn2)O[C@H]2[C@@H]1OC(O2)(C)C	analog of GW-92527	4.59413
CCC(NCC(COc1ccccc1C#N)O)(C)C	Penirolol	4.59126
COc1ccc2c(c1CN1CCCCC1)oc1c(c2=O)cccc1	mepixanox	4.58783
c1ccc(cc1)c1noc(c1)n1cc(c2c1cccc2)Cn1cncc1	MS 16056	4.58243
Cc1nc2ccccc2c(=O)n1c1ccccc1Cl	MECLOQUALONE	4.57999
COC(=O)[C@H](c1ccccc1)N1CCC(CC1)c1ccc(cc1)NC(=O)c1ccccc1c1ccc(cc1)C(F)(F)F	usistapide	4.57358
COc1ccc(cc1)C(=O)N1CCCC1C(=O)N1CCC(CC1)N1CCCC1=O		4.57314
Oc1ccc(cc1)C1COc2c(C1c1ccc(cc1)O)ccc(c2)O		4.56798
CO[C@H]1C(=O)[C@]2(C)[C@@H](OC)C[C@@H]3C([C@H]2[C@@H]([C@]2(C(C1=C(C)[C@@H](OC(=O)[C@@H]([C@H](c1ccccc1)NC(=O)OC(C)(C)C)O)C2)(C)C)O)OC(=O)c1ccccc1)(CO3)OC(=O)C	cabazitaxel	4.56638
Clc1cc(cnc1Cl)N1C[C@@H]2[C@H](C1)CN2	ABT-894	4.5638
O[C@H]1[C@H](O[C@H]2CC[C@]3(C(=C2)CC[C@@H]2C3CC[C@]3([C@]2(O)CC[C@@H]3c2ccc(=O)oc2)C)C)O[C@H]([C@@H]([C@H]1O)O)C	Proscillaridin	4.55344
OC(=O)[C@@H]1N2C(=O)[C@H]([C@H]2SC1(C)C)Br	BROBACTAM	4.55291
CN(CCNC(=O)C(NC(=O)c1cc2CCCCCCc2n(c1=O)CC1CCCCC1)(C)C)C		4.55161
COc1ccc2c(c1)nc([nH]2)SCc1ncc(c(c1C)OC)C	Ufiprazole	4.54769
CCCCNc1nc(c(s1)C(=O)c1ccc2c(c1)[nH]c(n2)NC(=O)OC)C	CGI-13866	4.54242
CCC(=O)N1Cc2ccccc2CC2(C1)CCCCN2CC1CCOCC1		4.54109
Fc1ccc2c(c1)[nH]c(=O)n2CCCN1CCC(CC1)n1c(=O)[nH]c2c1ccc(c2)Cl	FLUMERIDONE	4.53527
N#Cc1ccc(cc1)Nc1nc(Oc2c(C)cc(cc2C)C#N)c2c(n1)[nH]cc2	RDEA-427	4.53271
COc1ccc2c(c1OP(=O)(OCc1ccccc1)OCc1ccccc1)c(O)cc(n2)c1cccc(c1)F	TRX-818	4.52917
ClCC[N+](c1ccc(cc1)CC(=O)O)(CCCl)[O-]	FARANOXI	4.52884
CCCCCCOC(=O)/N=C(\c1ccc(cc1)NCc1nc2c(n1C)ccc(c2)C(=O)N(c1ccccn1)CCC(=O)OCC)/N	prodrug Dabigatran etexilate mesilate	4.52398
ONC(=O)/C=C/C#Cc1cccc(c1)NS(=O)(=O)c1ccccc1	OXAMFLATIN	4.52368
CCN(c1ccc(cc1)n1nc2c(n1)cc(c(c2)N)C)CC	SMT-C1100	4.52212
N=C(Nc1ccn(n1)CCCCC(=O)N)NCC(F)(F)F	ICI-162846	4.52009
CCN1C[C@@]2(CCC(C34[C@@H]1C(CC23)[C@@]1(O)CC(C2CC4[C@]1(O)[C@H]2OC)OC)OC)OC(=O)c1ccccc1NC(=O)C	Lappaconitine	4.51838
CCN(CCCNc1nccc2c1c(C)c1c(c2C)nc2c1cc(O)cc2)CC	SR-26050	4.51799
O[C@H]1CC(=O)O[C@@H](C1)/C=C/C(=C(c1ccc(cc1)F)c1ccc(cc1)F)c1nnnn1C	BMY 22089	4.51701
CCOc1ccc2c(c1)sc(n2)SC(c1ccccc1)(C(=O)O)C	tazasubrate	4.51407
ClC(=C(c1cc(N)c(cc1S(=O)(=O)N)S(=O)(=O)N)Cl)Cl	CLORSULON	4.50074
Brc1ccc(cc1)CN1CCCC21Cc1ccccc1CNC2=O		4.50064
c1csc(c1)c1cn2c(n1)SCC2		4.49897
O=C(/C=C/c1ccc(nc1)C)NCCCCN1CCN(CC1)C(c1ccccc1)c1ccccc1	TAGORIZINE	4.49436
Clc1cccc(c1)[C@]1(O)OCC(N[C@H]1C)(C)C	Radafaxine hydrochloride	4.49387
OC(=O)[C@H](c1c(C)nc2c(c1c1ccc3c4c1nccc4CCO3)cccc2)OC(C)(C)C	BI-224436	4.49292
COc1ccccc1N1CCN(CC1)CC(COc1cccc2c1cccc2)O	NAFTOPIDIL	4.47364
CCN1CCCCC21CN(Cc1c(C2)cccc1)C(=O)CCCN(C)C		4.47201
CNCc1ccc(c2c1sc1ccccc1c2=O)NCCN(CC)CC	WIN 33156	4.47186
NC(=O)[C@@H](NCc1ccc(cc1)OCc1ccccc1F)C		4.47016
OC(=O)C1(C)CCN(CC1)C(=O)c1ccc2c(c1)OC(O2)(F)F		4.46695
COc1ccccc1c1csc(n1)Cc1nc2n(c1)cccc2		4.46577
CCOC(=O)/C=C/1\SC(C(=O)N1C)N1CCCCC1	dexetozoline	4.46254
O=C1NC(=O)CCC1(C)c1ccncc1		4.45627
CC([C@@H](C(=O)N1CCC[C@H]1C(=O)N1CCC[C@H]1C(=O)O)N)C	VPP	4.45202
O=C1C=C[C@]2(C(=C1)CC[C@@H]1[C@]2(F)[C@@H](O)C[C@]2([C@H]1C[C@H]([C@]2(OC(=O)C1CC1)C(=O)COC(=O)C1CCCCC1)C)C)C		4.44874
CCCOc1ccc(cc1Cl)c1onc(n1)c1ccc2c(c1)cc(o2)C(CO)(CO)N	AKP-11	4.44501
CCCCCCC(=O)O[C@H]1CC[C@@H]2[C@]1(C)CC[C@H]1[C@H]2CC[C@@H]2[C@]1(C)C(=CC(=O)C2)C	METHENOLONE 17-ENANTHATE	4.44163
COc1ccc(cc1)C(=O)Nc1ccc(cc1)S(=O)(=O)NC(C(=O)O)CC#CCN1CCOCC1	PG-116800	4.43837
OC[C@H]1O[C@H]([C@H]([C@@H]1O)F)n1cc(I)c(nc1=O)N	FIAC, Pharmos	4.4349
Cc1cc(Nc2ccc(cc2)S(F)(F)(F)(F)F)n2c(n1)nc(n2)C(F)(F)C	DSM-265	4.43222
O=C1[C@H](N=C(c2c(N1C)cccc2)c1ccccc1)NC(=O)c1cc2c3n1CCCc3ccc2	Tarazepide	4.42575
O=C(Nc1ccc(cc1)S(=O)(=O)c1ccc(cc1)NC(=O)CCC(=O)O)CCC(=O)O		4.42287
Clc1cnn(c1)CCCCN1CCN(CC1)c1ncccn1	LESOPITRON	4.4215
CC(CCN1CCC2(CC1)C(=O)Nc1c2cccc1)C		4.41973
COc1ccccc1c1csc(n1)Cc1nc[nH]c1C	CP 93318	4.41945
CC(CCCC(C1CCC2[C@]1(C)CCC1C2CCC2[C@]1(C)CC[C@H](C2)N1CC(C1)OS(=O)(=O)C)C)C	Sch-19457	4.41908
COc1cccc(c1)C1CC1CNC(=O)C		4.41716
CCC(N(C(CC)C)CC(c1cccn1Cc1ccccc1Cl)O)C	VIMINOL	4.41168
COc1ccc(cc1)C(=O)N1CC2(C1)Cc1ccccc1N(C2)C(=O)C		4.41125
NCC(=O)N1CCn2c(C1(C)C)nc(c2Nc1ccc(cc1)Cl)c1ccc(cc1)F	GNF-179	4.40962
COc1ccccc1[C@@H]([C@](C(=O)N1CCC(CC1)c1cccc(c1)C(F)(F)F)(C#N)C)c1cccc2c1cccc2	WAY-204688	4.40909
CCCCN(C(c1ccc(cc1)OC)C(=O)N)CCCC	Ambucetamide	4.4036
[O-][N+](=O)c1nccn1CC(CO)O	Ro-05-9963	4.40012
Nc1nc(cc(n1)c1ccc(cc1)C[C@@H](C(=O)O)N)O[C@@H](C(F)(F)F)c1ccc(cc1n1ccc(n1)C)Cl	Telotristat	4.39685
O=C1N(CCN1S(=O)(=O)C)c1ncc(n1C)[N+](=O)[O-]	satranidazole	4.39577
CN([C@H]1CCN(C1)Cc1ccc(cc1C(F)(F)F)C(=O)Nc1ccc(c(c1)Nc1nccc(n1)c1cncnc1)C)C	bafetinib	4.38575
Nc1cc2CCN3c2c(c1)C(=N[C@H](C3=O)NC(=O)c1cccnc1)c1ccccc1	PD-168787	4.38558
OC(CN1CCCCC1)CO/N=C(/c1cccnc1)\N	BGP-15	4.38251
OC(C(C)(C)C)(Cn1ncnc1)COc1ccc(cc1)Cl	vibunazole	4.38199
OC1C(=O)C(O)C(=O)C(=O)C1=O	TETROQUI	4.38082
CC(=O)O[C@H]1C[C@H](O[C@H]2CC[C@]3([C@@H](C2)CC[C@@H]2[C@@H]3C[C@@H](OC(=O)C)[C@]3([C@]2(O)CC[C@@H]3C2=CC(=O)OC2)C)C)O[C@@H]([C@H]1O[C@H]1C[C@H](OC(=O)C)[C@@H]([C@H](O1)C)O[C@H]1C[C@H](OC(=O)C)[C@@H]([C@H](O1)C)OC(=O)C)C	Digoxin, Derivative of	4.38065
COc1ccc(cc1OC)Cc1nccc2c1cc(OC)c(c2)OC	papaverine, S-P	4.37884
CCOC(=O)[C@@H](NC(=O)c1cc(Cl)c(c(c1O)Cl)OCCN1CCN(CC1)C)Cc1ccccc1	JTE-607	4.37753
NCCCC[C@@H](C(=O)Nc1ccc(c(c1)C(=O)N[C@H](C(=O)Nc1ccc(c(c1)C(=O)N)OC)CCCCN)OC)NC(=O)c1cc(ccc1OC)NC(=O)[C@@H](NC(=O)c1cc(ccc1OC)NC(=O)[C@H](CCCCN)N)CCCCN	delparantag	4.37628
CCC(=O)C1c2cccc(c2C(=O)c2c1cccc2O)O		4.37615
COc1ccc2c(c1)c(=O)n(c(c2)c1ccc(cc1)OCC(CNC(C)(C)C)O)C	draquinolol	4.36787
C#CCOc1ccc2c(c1)c(nc(=O)n2Cc1ccc(cc1)Br)c1ccc(cc1)C(C)C	AXT-914	4.36346
OC(=O)C(Oc1ccc(cc1)C1CCCc2c1cccc2)(C)C	Nafenopin	4.35745
CN(C(=O)N1CCC2(CC1)CN(Cc1c(O2)cccc1)C(=O)C)C		4.35563
CC(NC(=O)C1CCCN(C1)c1nc2c(o1)cccn2)C		4.35392
O=C1c2nc3ccccc3c(=O)n2c2c1cccc2	Tryptanthrin	4.35367
CN1CCN(CC1)C(=O)/C=c\1/c2ccccc2[nH]c(=O)c2c1cccc2	Darenzepine	4.3489
COc1cc(nc2c1cccc2)C(=O)NC[C@@H]1CC[C@H]2C[C@@H]1C2(C)C		4.34886
Cl[Ru-2](Cl)(Cl)(Cl)(Cl)Cl		4.34625
OC(COc1ccc(cc1)C#N)CNCCCS(=O)(=O)C		4.34551
[O-]N=O	Sodium Nitrite	4.34179
Clc1ccc(cc1Cl)[C@@]12CNC[C@H]2C1	Amitifadine	4.33299
CC[C@H]1[C@@H](O)[C@H]2[C@@H]3CC[C@@H]([C@@]3(C)CC[C@@H]2[C@@]2([C@H]1C[C@H](O)CC2)C)[C@@H](CCOS(=O)(=O)[O-])C	INT-767	4.32944
Nc1nc(nc(c1)Cl)S[C@@H](c1ncc2c(c1)cco2)C	PNU 142721	4.32835
CCc1cc(OCc2ccc(cc2)c2ccccc2c2nnn[nH]2)c2c(n1)CCCC2	ZD 6888	4.32794
NC(=O)OC[C@@H]1[C@H](NC(=O)/C(=N\OCC(=O)[O-])/c2csc(n2)N)C(=O)N1S(=O)(=O)[O-]	Carumonam disodium salt	4.32704
OCCN(CCCC(Nc1ccnc2c1ccc(c2)Cl)C)CC	HYDROXYCHLOROQUINE SULFATE	4.32674
Fc1ccc(cc1)C(c1ccccc1F)(n1cncc1)c1ccccc1	flutrimazole	4.32332
OC[C@H](C(=O)N[C@H](C(=O)N[C@H](C(=O)N[C@@H](C(=O)NCC(=O)N[C@@H](C(=O)N[C@@H](C(=O)N[C@H](C(=O)N[C@H](C(=O)N[C@H](C(=O)N1CCC[C@@H]1C(=O)N[C@@H](C(=O)N[C@@H](C(=O)N)CC(=O)N)CCCNC(=N)N)CCCNC(=N)N)Cc1ccccc1)CC(C)C)Cc1ccccc1)Cc1ccc(cc1)O)CCCNC(=N)N)CO)CCC(=O)N)NC(=O)[C@H](NC(=O)[C@H](NC(=O)[C@H]1CCCN1C(=O)[C@@H](NC(=O)[C@@H](NC(=O)[C@H](NC(=O)[C@H](NC(=O)[C@H](NC(=O)[C@@H](NC(=O)[C@H](C(C)C)NC(=O)[C@…		4.31175
COc1nc(NCCc2ccc(cc2Cl)Cl)cc(n1)c1cccc(c1)C(C(=O)O)(C)C	SAR-389644	4.30902
ClCC(=O)[C@@]1(O)[C@H](C)C[C@@H]2[C@]1(C)C[C@H](O)[C@]1([C@H]2CCC2=CC(=O)C=C[C@]12C)Cl	MOMETASONE	4.30506
OCC(=O)[C@@]1(O)CC[C@@H]2[C@]1(C)C[C@H](O)[C@H]1[C@H]2CCC2=CC(=O)CC[C@]12C	HYDROCORTISONE	4.30464
Clc1ccc(cc1)OCCO/C(=C/n1cncc1)/c1ccc(cc1Cl)Cl	DEMOCONAZOLE	4.30162
OC(COc1ccccc1C1CC2CC1CC2)CNC(C)C	BORNAPROLOL	4.2977
OC[C@@H](C(=O)N)NC(=O)[C@@H]1CCCN1C(=O)[C@H](Cc1ccc(cc1)O)NC(=O)CNC(=O)[C@@H](NC(=O)[C@H](NC(=O)[C@H](Cc1ccc(cc1)O)N)C)Cc1ccccc1	tesetaxel	4.29658
CCCCCOc1ccc(cc1)C(C1CCCCC1)(CCN(C)C)O		4.29324
CN1CCC(=C2c3ccccc3SCc3c2cccc3)CC1		4.28963
O=C(NC1CCCC1)CNC(=O)c1cccc(c1)c1ccc(cc1)C(F)(F)F		4.28141
OCC#CCOc1ccc(cc1)S(=O)(=O)N1CCSC([C@@H]1C(=O)NO)(C)C	Apratastat	4.28141
Cl/N=C(/N=N/C(=N/Cl)/N)\N	CHLOROAZODIN	4.27195
C#C[C@]1(O)CC[C@@H]2[C@]1(C)CC[C@H]1[C@H]2CC[C@@H]2[C@]1(C)Cc1cn3c(nc1C2)nc1c3cccc1	WIN 51708	4.2713
Clc1ccc2c(c1)c1=NCCn1c1n2cnc1c1noc(n1)C1CC1	U 90042	4.26624
CCCC(C(=O)OC1CC2CCC(C1)[N+]2(C)C(C)C)CCC	Sintropium iodide	4.26328
CCC(OCC(N1CCCC1)CN(c1ccc2c(c1)OCO2)Cc1ccccc1)C	CERM 11956	4.26223
CC(=O)N1CCC(CC1)c1nccnc1Oc1ccc(cc1)C(=O)c1nc2c([nH]1)cccc2	AMG-579	4.25856
COc1cccc(c1)C1(O)CCN(CC1)C[C@@H](COc1cccc2c1cc[nH]2)O	LY 333068	4.24888
CCOC(=O)c1c[n+](C)c2n(c1=O)C(C)CCC2	PH-CBR-2016-001-HVAC-01457-0	4.24358
Cc1ccc(cc1)C(=O)c1cccn1C/C=C/c1ccc(cc1)COC(C(=O)O)(C)C	DSP-8658	4.24206
OP(=O)([C@@H](S(=O)(=O)O)CCCc1cccc(c1)Oc1ccccc1)O	PH-CBR-2016-001-HVAC-04581-0	4.2352
FC(c1nnc(cc1c1ccccc1)N1CCNCC1)(F)F	JNJ-39269646	4.22844
CC(=O)OCC(=O)[C@@]1(O)CC[C@@H]2[C@]1(C)C[C@H](O)[C@]1([C@H]2CCC2=CC(=O)CC[C@]12C)F	dexamethasone acetate, Laboratoires CTRS	4.22589
CCN1[C@@H]2CC[C@H]1C[C@H](C2)OC(c1ccccc1)c1ccccc1	ETHYBENZTROPINE	4.22541
CCOc1ncc(c2c1[C@@H](C(=C(N2)C)C(=O)N)c1ccc(cc1OC)C#N)C	Finere	4.22443
COc1cc(OC)cc(c1/C=C/S(=O)(=O)Cc1ccc(c(c1)NCC(=O)O)OC)OC	Rigosertib sodium	4.21871
C=C[C@H]1CN2CCC1C[C@@H]2[C@H](c1ccnc2c1cc(OC)cc2)O	Quinidine	4.21776
O=c1c(C)coc2c1cccc2		4.2172
OC(=O)COc1cc(OCC=C(C)C)ccc1C(=O)/C=C/c1ccc(cc1)OCC=C(C)C	sofalcone	4.21653
O=C(N1CCN(CC1)c1nc2c(o1)cccn2)C1CC1		4.2089
O=C(N1CCCN(CC1)c1nc2c(o1)cccn2)C1CCCC1		4.20556
NC(=O)C(c1ccccc1)(c1ccccc1)CC[N+]1(C)CCCCCC1	BUZEPIDE METIODIDE	4.20323
CCNC(=O)c1nn(c(n1)CN(C)C)c1ccc(cc1C(=O)c1ccccc1Cl)Cl	CGP-11952	4.2022
O=C1N(C[C@@H]2CCCC[C@H]2CN2CCN(CC2)c2nsc3c2cccc3)C(=O)[C@@H]2[C@H]1[C@H]1CC[C@@H]2C1	lurasidone hydrochloride	4.1978
OC1CCC2(C34C1Oc1c4c(CC2N(CC3)CC2CCC2)ccc1O)O	nalbuphine, IS Pharma	4.19727
COc1ccc(cc1)C(=O)N1CCC2(CC1)NC(=O)c1c(O2)cccc1		4.19545
CCOC(=O)N(S(=O)(=O)C(F)(F)F)c1cccc(c1)C(=O)c1ccccc1	TRIFLUMIDATE	4.19407
OC(=O)CCC/C=C\C[C@@H]1[C@@H](/C=C/[C@H](CCc2ccccc2)O)C=CC1=O	17-phenyl trinor PGA2	4.1926
CCOC(=O)C(CC(C(=O)N1[C@@H](Cc2c1cccc2)C(=O)O)C)C	PENTOPRIL	4.18629
COc1ccc(cc1)OCC(CN1CCC(CC1)c1ccc(cc1)O)O		4.18527
COc1cc(cc(c1OC)OC)C(=O)OC(CN1CCOCC1)COCCC12C[C@@H]3C[C@H](C2)C[C@H](C1)C3		4.17415
C1CN=C(N1)N/N=C/c1c2ccccc2c(c2c1cccc2)/C=N/NC1=NCCN1	bisantrene HCl, Update Pharma	4.17082
O=C1c2c3ccccc3c(=O)n(c2c2c1cccc2)Cc1ccc2c(c1)OCO2		4.16005
Cc1ncsc1CCCl	clomethiazole, AstraZeneca	4.15807
CCCC(c1ccc(cc1)OCc1ccc(cc1)c1csc(n1)CN(Cc1ncc(s1)C(C)(C)C)CC(=O)O)CCC	JTT-551	4.15769
CC(=O)N1Cc2ccccc2CC2(C1)CCCCN2CC1CNCC1		4.14822
COc1cc2CCN([C@H]3c2cc1Oc1c2c(CCN([C@H]2Cc2ccc(Oc4cc(C3)ccc4OC)cc2)C)cc2c1OCO2)C	Cepharanthine	4.1478
C/C=C\1/NC(=O)C(NC(=O)c2csc(n2)C23CCC(=NC3c3csc(n3)C(NC(=O)c3nc(C(NC(=O)C4N=C1SC4)C(C(O)C)(O)C)sc3)C(C)OC(=O)c1cc(C(O)C)c3c(n1)C(O)C(C=C3)NC(C(=O)NC(C(=O)NC(=C)C(=O)NC(C(=O)N2)C)C)C(CC)C)c1scc(n1)C(=O)NC(=C)C(=O)NC(=C)C(=O)N)C(O)C	THIOSTREPTON	4.1448
CC[C@@H]([C@@H]1C(=O)N[C@@H](C(=O)N1[C@H](c1ccc(nc1C)C)C(=O)N1CCOCC1)C1Cc2c(C1)cccc2)C	epelsiban	4.14226
CC(Cc1ccc2c(c1)OCO2)NCC(c1ccc(c(c1)O)O)O	PROTOKYLOL HYDROCHLORIDE	4.14117
O=S1(=O)NC(Cc2ccccc2)Nc2c1cc(c(c2)C(F)(F)F)S(=O)(=O)N	Bendrofluazide	4.14077
COc1cc2c(cc1OC)CCN([C@H]2Cc1ccc(cc1)Oc1cc(ccc1O)C[C@H]1N(C)CCc2c1cc(OC)c(c2)OC)C	Dauricine	4.1369
C1CCn2c(CC1)nnn2	PENTYLENETETRAZOL	4.13629
	PORCINE INSULIN	4.1356
OCC1CS[As](S1)c1ccc(cc1)Nc1nc(N)nc(n1)N	Melarsoprol	4.13437
Clc1ccc(cc1)C1(O)c2ccccc2C2=NCCN12	mazindol	4.1338
COc1cc(ccc1OC)Cc1nc(=O)c2n([nH]1)c(nc2C)[C@H]([C@H](O)C)CCCc1ccccc1	BAY-60-7550	4.13299
Fc1ccc(c(c1)F)COC[C@H](C(=O)N1CCC2=NN(C(=O)[C@@]2(C1)Cc1ccccn1)CC(F)(F)F)NC(=O)C(N)(C)C	CP-464709	4.1327
OC[C@@H]1CC[C@@H](O1)n1cc(I)c(=O)[nH]c1=O		4.12847
CC(COCC(N1CCCC1)CN(c1ccccc1)Cc1ccccc1)C	bepridil	4.12694
OC(=O)C1CCN1C12CC3CC(C2)CC(C1)C3	CARMANTADINE	4.12353
COc1cc2CC[n+]3c(c2cc1OC)c(C)c1c(c3)c(OC)c(cc1)OC	Dehydrocorydaline	4.11788
CCCCCCSc1nsnc1C1=CCCN(C1)C	Tazomeline	4.11665
CCCN(CCc1ccc(c(c1)O)O)CCC	Dipropyldopamine hydrobromide	4.11617
CC(=CCc1ccc(cc1)C(C(=O)O)C)C	TA 60	4.11479
C/C=C/1\[C@H]2C=C(C[C@]1(/N=C/c1cc(Cl)cc(c1O)OC)c1c(C2)[nH]c(=O)cc1)C	ZT 1	4.1136
OC[C@@H](C(=O)N[C@H](C(=O)N[C@H](C(=O)N)CC(=O)N)CS)NC(=O)[C@@H](NC(=O)[C@@H]1CCCN1C(=O)C)Cc1nc[nH]c1	Ac-PHSCN-NH2	4.11144
COC(=O)Nc1nc2c([nH]1)cc(cc2)C(=O)c1cccs1	nocodazole	4.1104
CC(=O)OCC(=O)[C@@]1(O)[C@H](C)C[C@@H]2[C@]1(C)C[C@H](O)[C@]1([C@H]2C[C@@H](C2=CC(=O)C=C[C@]12C)F)F	Flumethasone Acetate	4.10977
COc1cc(ccc1OC)CC1NCCc2c1cc(OC)c(c2)OC	TETRAHYDROPAPAVERINE	4.1053
Fc1ccc(cc1)CC(=O)N1CCCC1C(=O)N1CCC(CC1)N1Cc2c(C1=O)cccc2		4.10271
OC[C@H]([C@H]([C@@H]1OC(=C[C@@H]([C@H]1NC(=O)C)NC(=N)N)C(=O)O)O)O	zanamivir	4.10226
CCN(CCCNc1ccnc2c1ccc(c2)Cl)CC	AQ-13	4.09959
NCCC(P(=O)(O)[O-])(P(=O)(O)[O-])O	Pamidronate Disodium	4.09852
Oc1cc(O)c2c(c1)[o+]c(c(c2)O[C@@H]1O[C@H](CO[C@@H]2O[C@@H](C)[C@@H]([C@H]([C@H]2O)O)O)[C@H]([C@@H]([C@H]1O)O)O)c1ccc(c(c1)O)O		4.09765
C[N@+]12CC[C@H](CC1)C(C2)CN1c2ccccc2Sc2c1cccc2	MEQUITAMIUM IODIDE	4.09689
CCOC(=O)N(C1CC1)Cc1ccccc1	ENCYPRATE	4.09608
Brc1c(ccc2c1nccn2)NC1=NCCN1		4.09423
O=C1N(CCCCN2CCN(CC2)c2nsc3c2cccc3)C(=O)C2C1CCCC2	perospirone	4.0915
N#Cc1ccc2c(c1)COC2(CCCN(C)C)c1ccc(cc1)F	Citalopram	4.09093
CO[C@H]1C[C@H](O[C@H]2CC[C@]3([C@@H](C2)CC[C@@H]2[C@@H]3CC[C@]3([C@]2(O)C[C@@H]([C@@H]3C2=CC(=O)OC2)OC(=O)C)C)C)O[C@H]([C@@H]1O)C	Oleandrin	4.08566
O=C1NCc2c(CC31CCCCN3CC1CCCC1)cccc2		4.07572
Clc1ccc2c(c1)n(CC(=O)N1CCC(CC1)C(=O)Nc1cccc3c1cccc3)c(=O)s2		4.06872
O=C1CC[C@H](N1C)c1cccnc1	(-)-Cotinine	4.06422
CCCCC([C@@]1(O)CC[C@H]2[C@H](O1)CC(=O)[C@H]2CCCCCCC(=O)O)(F)F	Lubiprostone	4.06389
COC(=O)Nc1nc2c(n1)ccc(c2)Sc1ccc(cc1)NC(=O)[C@@H](N)C	DENIBULIN	4.06265
Fc1ccc(cc1)Nc1ccccc1C(=O)Nc1ccc(cc1)N1CCOCC1		4.05546
CCC(=O)c1ccc2c(c1)N(CC(N(C)C)C)c1c(S2)cccc1	Propiomazine	4.05158
OC(=O)COc1cccc(c1)CCc1nc(c(o1)c1ccccc1)c1ccccc1	BMY 42393	4.05052
COC(=O)Nc1cccc(c1)c1ccc(cc1F)N1C[C@@H](OC1=O)CNC(=O)C		4.04825
COc1cc(ccc1OC(=O)C)C1Oc2cc(ccc2OC1COC(=O)C)C1Oc2cc(OC(=O)C)cc(c2C(=O)C1OC(=O)C)OC(=O)C		4.0396
CN1C[C@@H]2[C@H](C1)[C@H]2CN(C(=O)c1ncn(c1)C)Cc1ccc(c(c1)Cl)F	PF-3463275	4.03796
Fc1ccc(cc1)C(=O)N1CCCC(C1)C(=O)N1CCC(CC1)N1CCCC1=O		4.03526
CC1OC(C(C1O)O)n1cc(F)c(=O)[nH]c1=O	doxifluridine	4.03365
c1ccc2c(c1)[nH]c(n2)c1nc2c([nH]1)cccc2	NSC 67061	4.03352
OCCOc1ncnc(c1Oc1cccc(c1)OC)NS(=O)(=O)c1ccc(cc1)C(C)(C)C	Ro-46-2005	4.03184
CCc1cc2CC(Cc2cc1CC)NC[C@@H](c1ccc(c2c1ccc(=O)[nH]2)O)O	indacaterol maleate	4.02897
CCN1c2ccc(cc2C(=CC1(C)C)C)C(c1ccccc1)(c1ccccc1)c1ccccc1		4.02134
CCCCCCCCOc1ccc(cc1)NC(=O)C(CO)(N)C	PPI-4621	4.0177
CCOC(=O)[C@H](CCC(=O)N[C@H](C(=O)N[C@H](c1ccccc1)C(=O)OCC)CSCc1ccccc1)N	ezatiostat hydrochloride	4.01012
[O-]C(=O)P(=O)([O-])[O-]	Foscarnet sodium	4.00952
CCOCn1cnc2c1c(=O)n(CCCCC(O)(C)C)c(=O)n2C	Torbafylline	4.00761
CN(Cc1ccc(cc1)c1ccccc1)CC1CCCCC1		4.00656
O=C(Nc1ccccc1N)/C=C/c1ccn(c1)S(=O)(=O)c1ccc(cc1)c1cnn(c1)C	4SC-202	4.00656
NCC1(CCN(CC1)c1ncnc2c1c(C)c[nH]2)C(=O)Nc1cccc(c1)OC(=O)N(C)C	LX-7101	4.00282
Clc1cc(N)cc(c1N=C1NCCN1)Cl	Pharmaprojects No. 1758	3.99982
OCC(COP(=O)(OCC[N+](C)(C)C)O)O	choline-L-alfoscerate	3.99726
[N-]=[N+]=N[C@]1(CO)O[C@H]([C@@H]([C@@H]1O)O)n1ccc(nc1=O)N	R-1479	3.99657
Clc1ccc2c(c1)C(=NC(C(=O)N2)O)c1ccccc1Cl		3.99473
CCC(c1ccccc1)(N(CC1CC1)C)C/C=C/c1ccccc1	Igmesine hydrochloride	3.99139
N#CC(c1c(Cl)cc(cc1Cl)n1ncc(=O)[nH]c1=O)c1ccc(cc1)Cl		3.99075
ONC(=O)[C@H]([C@H](C(=O)N[C@@H](c1ccccc1)C(=O)OC1CCCC1)CC(C)C)CC=C	BB-76163	3.98994
C[C@H]1C[C@@]2(C)[C@H](C[C@@H]1O)CCC1C2CC[C@]2(C1CC[C@@H]2C(=O)C)C	CO 127501	3.98868
CC(=O)O[C@@]1(CCC2[C@]1(C)C[C@H](c1ccc(cc1)N(C)C)C1=C3CCC(=O)C=C3CCC21)C(=O)C	ulipristal acetate	3.98677
CCCC[Sn](OC(=O)CCCCCCCCCCC)(OC(=O)CCCCCCCCCCC)CCCC	Dibutyltin Dilaurate	3.9843
O=C(N[C@@H](c1ccc(cn1)OCC(F)(F)F)C)Cc1ccc(cc1)c1nccnc1C	TTAA-8	3.98362
CN1Cc2c(ncn2c2c(C1=O)c(Cl)ccc2)C(=O)OCC	Sarmazenil	3.98347
OC(=O)CCNC(=O)[C@H](Cc1ccc(cc1)c1ccccc1)NCP(=O)(Oc1ccccc1)Oc1ccccc1	CGS-25462	3.9815
CCCOC(=O)Cc1ccc(c(c1)OC)OCC(=O)N(CC)CC	PROPANIDID	3.98099
OCCn1nc(c2c1c1nc(ncc1CC2)Nc1cc(ccc1OC(F)(F)F)N1CCN(CC1)C)C(=O)N	NMS-1286937	3.97956
CC(=O)NC[C@@H]1OC(=O)N(C1)c1ccc(c(c1)F)N1CCOCC1	LINEZOLID	3.97347
CCc1occc(=O)c1O[V](=O)Oc1c(=O)ccoc1CC	BEOV	3.97317
CN(CCCN1c2ccccc2Oc2c(C1=O)cc(cc2)[N+](=O)[O-])C	Nitroxazepine	3.97142
BrC[C@H]([C@H]([C@@H]([C@@H](CBr)O)O)O)O	mitobronitol	3.97114
O=C(c1ccc(cc1)c1ccc(cc1)C(F)(F)F)N[C@H](C(=O)O)Cc1ccc(cc1)c1ccccc1	TTP-889	3.96787
OCC#C[C@@]1(O)CC[C@H]2[C@]1(C)C[C@H](c1ccc(cc1)N(C)C)C1=C3CCC(=O)C=C3CC[C@@H]21	Org-31710	3.96781
COc1ccc(cc1)CN1CCC(CC1)N1CCCNC1=O		3.96276
CO[C@@H]1[C@@H](CO)CC1n1cnc2c1nc(N)[nH]c2=O		3.96255
Clc1cccc(c1)Nc1ncc(c(n1)C(F)(F)F)C(=O)NCc1cocc1		3.95756
CO[C@@H]1C[C@@H](CC[C@@H]1n1cnnn1)C[C@H]([C@H]1OC(=O)[C@@H]2CCCCN2C(=O)C(=O)[C@]2(O)O[C@@H](CC[C@H]2C)C[C@H](OC)/C(=C/C=C/C=C/[C@H](C[C@H](C(=O)[C@@H]([C@@H](/C(=C/[C@H](C(=O)C1)C)/C)O)OC)C)C)/C)C	Zotarolimus	3.95599
O=C(N1CCCCC1)/C=C/c1ccc2c(c1)OCO2	Ilepcimide	3.95235
COc1cc2CCN(CCc2cc1NS(=O)(=O)c1ccc(cc1)c1ccc(s1)Cl)C	SB-737050A	3.95137
[O-][N+](=O)O[Bi].[O-][N+](=O)O[Bi].[O-][N+](=O)O[Bi].[O-][N+](=O)O[Bi].O[Bi]=O.O.O.O.O.O.O.O.O	Bismuth subnitrate	3.95072
CN1CCN(CC1)c1cccc2c1oc(=O)[nH]2	Pardoprunox (hydrochloride)	3.94987
CCc1ccc(nc1)CCOc1ccc(cc1)CC1SC(=O)NC1=O	pioglitazone hydrochloride112529-15-4	3.94528
Cc1nnc2n1nc(cc2)c1cccc(c1)C(F)(F)F	CL-218872	3.94443
OC(=O)CC[C@@H](C(=O)O)NC(=O)[C@H]1CC[C@@H](C1)Oc1ccc(c(c1Cl)Cl)C(=O)c1ccccc1		3.94368
COc1ccc(cc1OCC(=O)N1CCN(CC1)Cc1ccccc1)CNc1cn[nH]c(=O)c1Cl	NIP 520	3.94066
CSCC[C@@H](C(=O)NCC(=O)N[C@H](C(=O)N[C@H](C(=O)N[C@H](C(=O)N[C@H](C(=O)N)Cc1ccccc1)CC(=O)O)CCSC)Cc1cnc2c1cccc2)NC(=O)[C@@H](NC(=O)[C@H](CC(=O)O)N)Cc1ccc(cc1)OS(=O)(=O)O	Sincalide	3.94002
OCC(Cn1cnc2c1c(=O)n(C)c(=O)n2C)O	diprophylline, Elan	3.93736
CC(=O)Oc1ccccc1C(=O)Oc1ccccc1	phenyl 2-(acetyloxy)benzoate	3.93239
CCC(C(=O)OC1CC(O)C=C2C1C(CCC(CC(CC(=O)O)O)O)C(C=C2)C)C	pravastatin	3.92922
Clc1ccc2c(c1)nc(c(c2O)c1ccccc1)O	MDL 104653	3.92742
Cn1c(=O)n(CC(=C)C)c(cc1=O)N	AMISOMETRADINE	3.92548
ONS(=O)(=O)c1cccc(c1)S(=O)(=O)C	CXL-1427	3.92276
CCN(CCOC(=O)C(Cc1cccc2c1cccc2)CC1CCCO1)CC	naftidrofuryl SR, Ethypharm	3.92164
ClC[C@H]1O[C@@]([C@H]([C@@H]1O)O)(CCl)O[C@H]1O[C@H](CO)[C@@H]([C@@H]([C@H]1O)O)Cl	SUCRALOSE	3.92068
NCCCC[C@@H](C(=O)N[C@H](C(=O)N[C@H](C(=O)N[C@H](C(=O)N[C@H](C(=O)N[C@H](C(=O)N[C@H](C(=O)N[C@H](C(=O)N[C@H](C(=O)O)C(C)C)CC(=O)O)CO)CCC(=O)O)[C@H](CC)C)CO)CO)CC(C)C)NC(=O)[C@@H](NC(=O)[C@@H](NC(=O)[C@@H](NC(=O)[C@@H](NC(=O)[C@@H](NC(=O)[C@@H](NC(=O)[C@@H](NC(=O)[C@@H](NC(=O)[C@@H](NC(=O)CNC(=O)[C@H](Cc1ccc(cc1)O)N)CCCNC(=N)N)CCCCN)CCCCN)CCCNC(=N)N)CCCNC(=N)N)CCC(=O)N)CCCNC(=N)N)CCCNC(=N)N)CCCNC(=…	Tat-NR2B9c	3.91905
N#Cc1ccc(cc1C(F)(F)F)N1C(=O)C2C(C1=O)C1(OC2(C)CC1NS(=O)(=O)CC)C	BMS-641988	3.918
CCN(CCOCCOC(=O)C(c1ccccc1)(CC)CC)CC	Oxeladin citrate salt	3.91336
Cc1ccccc1N(C1CN(C1)Cc1ccccc1)C		3.90877
Clc1ccc(cc1)Cn1cc(c2c1cccc2)C(=O)C(=O)Nc1ccncc1	indibulin, nanoparticle	3.90706
c1nc(NC2=NCC3(O2)CN2CCC3CC2)cc(n1)n1cncc1	BMS-933043	3.90699
COCCO[C@H]1[C@H](O)[C@H](Nc2c1ccn1c2nc(c1C)C)c1ccccc1	soraprazan	3.90535
CCc1ccc(cc1)NC(=O)N1CCN(CC1)c1ccccc1OC		3.90301
O=C([C@@H]1CC[C@]2(CC1)OC(=O)c1c2cncc1)Nc1ccn(n1)c1ccccc1F	NPY-Y5 antagonist, Banyu	3.90249
OC[C@H]1O[C@H](C(C1O)O)n1cnc2c1nc(nc2N)n1ncc(c1)C(=O)NC	REGADENOSON	3.90115
OB([C@@H](NC(=O)[C@H]([C@H](O)C)NC(=O)c1cccc(n1)c1ccccc1)CC(C)C)O	delanzomib	3.89955
COc1cc(ccc1OCCN1CCOCC1)C(=O)C		3.89793
O=C(N(c1nc(c(s1)S(=O)(=O)N)C)C)Cc1ccc(cc1)c1ccccn1		3.89633
ONC(=O)CN(C(=O)[C@@H]1CCCC[C@@H]1C(=O)O)C	IDRAPRIL	3.89003
COc1ncc(c(n1)OC)c1nc2c(n1C(C)C)[C@@H](N(C2=O)c1cc(Cl)cn(c1=O)C)c1ccc(cc1)Cl	HDM-201	3.88585
O=C1Cc2c(N1)ccc1c2OC(CNCc2ccccc2)CO1	Aplindore fumarate	3.88537
Nc1[nH]c2c(c1Cc1cscc1)nc([nH]c2=O)N	CI-972	3.88387
CCCCCCCCCCCCNC(=O)C[N+](Cc1ccccc1)(C)C	DODECARBONIUM CHLORIDE	3.88348
OCC(CCc1ccc(n1C)C(=O)CCCc1ccc(cc1)C)(N)C	CS-0777	3.88022
Fc1ccc2c(c1)c1CCO[C@@]3(c1[nH]2)CC[C@@](CC3)(N(C)C)c1ccccc1	Cebranopadol hemicitrate	3.87737
C[C@]12Cc3c[nH]nc3CC1CCC1C2CC[C@]2(C1CC[C@]2(C)O)C	Androstanazole	3.87468
NNCCc1ccccc1	Phenelzine sulfate	3.87019
O=C1N(Cc2c1cccc2)C1CCN(CC1)CC1CC1		3.86831
COCC(OC(=O)[C@H](Cc1ccc(c(c1)O)O)N)C		3.86831
COC(=O)COc1cccc(c1)CCc1nc(c(o1)c1ccccc1)c1ccccc1		3.86497
CONC(=N)c1ccc(cc1)c1ccc(o1)c1ccc(cc1)C(=N)NOC	pafuramidine	3.86399
O[C@H]1CCN(C1)C(=O)Nc1cnn2c1nc(cc2)N1CCCC1c1cc(F)ccc1F	LOXO-101	3.86112
CC(c1ccc(c2c(c1)c(C)cc2S(=O)(=O)O)C)C	azulene sodium sulfonate	3.85828
Clc1ccc(cc1)C1C(=O)c2c(C1=O)c(ccc2)c1ccccc1	Org-7258	3.85757
CCOc1ccc(cc1)CC(N(CC(=O)O)CC(=O)O)CN(CC(=O)O)CCN(CC(=O)O)CC(=O)O	Gadoxetate disodium	3.85683
OC(=O)c1cccnc1Nc1cccc(c1C)C(F)(F)F	flunixin	3.85595
Cc1cc(C)c(c(c1)C)NC(=O)N(C1CCCCCC1)Cc1ccc2c(c1)Cc1c2cccc1	YM-750	3.84467
Fc1ccc(cc1)CC1CCN(CC1)C(=O)C(=O)Nc1ccc2c(c1)oc(n2)O	radiprodil	3.83961
CO/N=C(\c1ccc(cc1)c1ccc(o1)c1ccc(cc1)/C(=N\OC)/N)/N	pafuramidine	3.83852
CCOc1ccc(cc1)C(=O)CCC(=O)N1CCC(=CC1)c1ccc(cc1)OC		3.83797
NCC(=O)N1CCn2c(C1(C)C)nc(c2Nc1ccc(cc1)F)c1ccc(cc1)F	GNF-156	3.82945
CCN(CCOc1cccc(c1)c1cn2c(n1)sc1c2cccc1)CC	YM-201627	3.82458
COC1=CC(=O)C[C@H]([C@@]21Oc1c(C2=O)c(OC)cc(c1Cl)OC)C	Griseofulvin126-07-8	3.8243
Fc1ccc2c(n1)oc(n2)c1cnc2c(c1)ccn2C	MK-3328	3.81967
FC([C@]1(C#CC2CC2)NC(=O)Nc2c1cc(Cl)cc2)(F)F	DPC 961	3.81636
O/N=C/c1cc[n+](cc1)COC[n+]1ccc(cc1)/C=N/O	Obidoxime chloride	3.81545
CCCC(=O)N1Cc2ccccc2CC2(C1)CCCCN2C		3.81261
O=C(N[C@@H]1C(=O)N2[C@@H]1SCC(=C2C(=O)[O-])C[n+]1ccccc1)Cc1cccs1	Cefaloridine	3.81109
C=CC(=O)Nc1cc2c(ncnc2cc1OCCCN1CCOCC1)Nc1ccc(c(c1)Cl)F	Canertinib dihydrochloride	3.81098
CCNC1(CCN(CC1)c1ncnc2c1nc(n2c1ccc(cc1)Cl)c1ccccc1Cl)C(=O)N	Otenabant hydrochloride	3.81083
Nc1ncc(cc1O[C@@H](c1c(Cl)ccc(c1Cl)F)C)c1cnn(c1)C1CCNCC1	crizotinib	3.80985
OCC/C(=C(/N(Cc1cnc(nc1N)C)C=O)\C)/SSCC1CCCO1	Fursultiamine	3.80963
CC(=O)NC[C@@H]1OC(=O)N(C1)c1ccc(c(c1)F)n1nncc1	PNU 140457	3.80837
OC(C12CC[N+](CC1)(CC2)CCOCc1ccccc1)(c1ccccc1)c1ccccc1	Umeclidinium bromide	3.80208
CC(=O)NCC(=O)N1Cc2ccccc2CC2(C1)CCCN2Cc1ccccc1		3.79915
COc1c2c(CCN(C2O)C)cc2c1OCO2	COTARNINE	3.79271
Oc1ccc2c(c1)CC[C@@H]1[C@@H]2CC[C@]2([C@H]1CCC2=O)C	Estrone	3.7911
O=C(N1CCCc2c1ccc(c2)OC(=O)c1ccco1)C(Cl)Cl	quinfamide	3.79102
COc1c(OC)cc2c(c1OC)c1ccc(c(=O)cc1C(CC2)N)OC	(R/S)-N-Deacetyl Colchicine	3.78908
NCCCCC(B(O)O)NC(=O)C1(CCCC1)C(=O)NCCc1ccccc1	S 31922	3.78835
OC(CNC(Cc1cnc2c1cc(C)cc2)(C)C)COc1cccc2c1cc(n2)C	SR 41717A	3.78623
COc1cc(C(C)C)c2c(c1)S(=O)(=O)N(C2=O)COc1cc(=O)n2c(n1)c(OCCN1CCCCC1)ccc2	SSR 69071	3.7827
COc1ccc(cc1)C(=O)NCCCCN1CCN(CC1)c1csc2c1ccc(c2)C(F)(F)F	HMR-2554	3.78209
BrCCNP(=O)(NCCBr)OCc1cnc(n1C)[N+](=O)[O-]	Evofosfamide	3.77216
O=C1NC(=O)C(N1)(C)c1cccc2c1cccc2		3.76697
CC#CCC([C@@H](/C=C/[C@H]1[C@H](O)C[C@H]2[C@@H]1C/C(=C/CCCC(=O)O)/C2)O)C	Iloprost	3.75924
ONC(=O)C[C@H](C(=O)N[C@H](C(=O)NC)Cc1c[nH]c2c1cccc2)CC(C)C	GM 6001	3.7587
COC[C@]1(OC)CC[C@@H]2[C@]1(C)C[C@H](c1ccc(cc1)/C=N/O)C1=C3CCC(=O)C=C3CC[C@@H]21	Asoprisnil	3.75684
O=C1CCCN1CC#CCn1cnc(c1)C		3.75393
CN(C(CN1c2ccccc2Sc2c1cccc2)C)C	Phenergan58-33-3	3.75311
CC([C@H](N(C(=O)[C@H](C(C)C)NC(=O)[C@@H](N(C)C)C(C)C)C)C(=O)N1CCC[C@H]1C(=O)N1CCC[C@H]1C(=O)NCc1ccccc1)C	Cemadotin hydrochloride	3.75295
NC(=O)c1cnc2c(c1NC1[C@@H]3CC4C[C@H]1C[C@](C3)(C4)O)cc[nH]2	peficitinib	3.752
O=S(c1nc2c([nH]1)cccc2)Cc1nccc(c1C)OCC(F)(F)F	Lansoprazole	3.75108
CN(CCn1cc(c2c1cc(Cl)cc2)C(=O)N1CCC2(CC1)OCc1c2cccc1)C	RO5028442	3.7481
Cc1c[nH]nc1	fomepizole	3.74779
CC#CC(=O)N1CCC[C@H]1c1nc(c2n1ccnc2N)c1ccc(cc1)C(=O)Nc1ccccn1	Acalabrutinib	3.74043
CCCCN1CCC(CC1)CNC(=O)c1c2OCCCn2c2c1cccc2	Piboserod hydrochloride	3.73847
CN1CCN(CC1)C(=O)O[C@H]1c2nccnc2C(=O)N1c1ccc(cn1)Cl	Eszopiclone	3.73626
COCCNCC(COc1ccc2c(c1)CCC(=O)N2)O		3.73257
CC[n+]1c(/C=C/c2ccc(cc2)N2CCCC2)cccc1/C=C/c1ccc(cc1)N1CCCC1	STILBAZIUM IODIDE	3.73073
CCCC[C@H]1C(=O)O[C@H](C)[C@@H](C(=O)O[C@H]([C@H]1CC(=O)CC(C)C)C)N(C(=O)c1cccc(c1O)NC=O)C	Antimycin A3	3.72927
O=C1CN2C(=Nc3c(C2)cc(cc3)/C(=N/OCC(=O)N(C2CCCCC2)C)/c2ccccc2)N1	REVIZI	3.72907
COCC(=O)[C@@]1(OC(=O)CC)[C@@H](C)C[C@@H]2C1(C)C[C@H](O)[C@]1([C@H]2CCC2=CC(=O)C=CC12C)F	AMELOMETASONE	3.72871
COc1ccc2c(c1)/C(=C/c1c[nH]cn1)/C(=O)N2	SU-9516	3.72761
CCCCCCC/C=C/C(=O)NCCSCCC1CCCCC1	GH 0966	3.72616
OC(=O)CCc1ccc(cc1)c1sccc1C	T-3788	3.72461
CN1CCC(CC1)Nc1ncc2c(n1)c(ncn2)Nc1ccc(c(c1)Cl)F	Falnidamol	3.72425
COC(=O)N[C@H](C(=O)N1CCC[C@H]1c1[nH]c2c(n1)cc(cc2)c1csc2c1scc2c1ccc(cc1)c1cnc([nH]1)[C@@H]1CCCN1C(=O)[C@@H](c1ccccc1)NC(=O)OC)C(C)C	Samatasvir	3.72357
Cc1c(Nc2ncccc2C(=O)OCC(CO)O)cccc1Cl	CLONIXERIL	3.71743
O=C(c1ccccc1)C1CCN(CC1)CCCn1c(=O)c2n(C)cnc2n(c1=O)C		3.71653
NCCCN(C(=c1[nH]c2cc(Cl)ccc2c(=O)n1Cc1ccccc1)C(C)C)C(=O)c1ccc(cc1)C	ispinesib mesylate	3.71317
CCCCN(Cc1ccc(c(c1)c1ccccc1C)C(=O)N[C@H](C(=O)OC)CCSC)CCC1CCCCC1		3.71301
CC(C(C(=O)O)N)O	threonine, Indevus	3.71116
CCOC(=O)C(NC(=O)c1c(F)cccc1F)Cc1ccc(cc1)c1c(C)n(C)c(=O)n(c1=O)C	A4I	3.70873
OC(=O)C1(CC1)c1ccc(c(c1)F)c1ccc(c(c1)Cl)Cl	CHF-5074	3.70608
O=C1NC2(CCN(CC2)Cc2ccc(cc2)C(F)(F)F)Oc2c1cccc2		3.70136
CCC(C(=O)C(=O)N1CCC[C@H]1C(=O)OCCCc1cccnc1)(C)C	GPI-1046	3.69956
CC[C@@H]1/C=C(\C)/C[C@H](C)C[C@H](OC)[C@H]2O[C@](O)([C@@H](C[C@@H]2OC)C)C(=O)C(=O)N2[C@H](C(=O)O[C@@H]([C@@H]([C@H](CC1=O)O)C)/C(=C/[C@@H]1CC[C@H]([C@@H](C1)OC)O)/C)CCCC2	Immunomycin	3.69914
CC(=O)c1ccc(cc1)C#C[C@@]1(O)CC[C@]2([C@H](C1)CC[C@@H]1[C@@H]2CC[C@]2([C@H]1CC[C@@H]2C(=O)C)C)C	CO 152791	3.69873
Clc1ccc(cc1)C(c1ccccn1)(C1=NCCN1)O	DAZADROL	3.69817
O=S(=O)(C(F)(F)F)Nc1cccc(c1)OCc1ccc2c(n1)cccc2	Ritolukast	3.69673
O=C1NC(=O)C2(N1)c1cc(Cl)cc(c1N(C2=O)Cc1cccc(c1)C(F)(F)F)C	AZD-1386	3.69649
OC(=O)[C@H](c1ccc2c(c1)ccc(c2)OCc1ccc2c(n1)cccc2)C	WY 50295	3.69345
CC1(NCCc2c1cccc2)c1ccccc1	FR 115427	3.69113
Fc1cccc(c1)Cn1c(cc2c1cncc2)C(=O)Nc1ccc2c(c1)nc(n2C)C		3.68842
Nc1ncc(c(c1)C(F)(F)F)c1cc(nc(n1)N1CCOCC1)N1CCOCC1	buparlisib	3.68762
O=C(Nc1cc(Br)ccc1c1nn[nH]n1)Nc1cc(cc(c1)C(F)(F)F)C(F)(F)F	NS3728	3.68645
COc1cnc(c2c1c(c[nH]2)C(=O)C(=O)N1CCN(CC1)C(=O)c1ccccc1)OC	BMS-488043	3.68476
CCc1noc(c1c1[nH]c2c(c1C(CN(C)C)O)cccc2)C	SaRI-59-801	3.67701
COCCNC(=O)COc1ccc(cc1)OCCNC[C@@H](COc1ccccc1)O	ICI-D7114	3.67641
OCC(CCCCOCCCCC(CO)(C)C)(C)C	ESP-24232	3.67543
OC[C@H]1O[C@@H](O[C@H]2CC[C@]3([C@H](C2(C)C)CC[C@@]2([C@@H]3C[C@@H](O)[C@H]3[C@@]2(C)CC[C@@H]3[C@@](O[C@@H]2O[C@H](CO)[C@H]([C@@H]([C@H]2O)O)O)(CCC=C(C)C)C)C)C)[C@@H]([C@H]([C@@H]1O)O)O[C@@H]1O[C@H](CO)[C@H]([C@@H]([C@H]1O)O)O	Ginsenoside Rd	3.67383
ClCC(=O)[C@@]1(OC(=O)c2ccco2)[C@H](C)C[C@@H]2[C@]1(C)C[C@H](O)[C@]1([C@H]2CCC2=CC(=O)C=C[C@]12C)Cl	mometasone furoate stent, Intersect ENT-2	3.67226
OC(C1CCc2c(O1)ccc(c2)F)CNCC(C1CCc2c(O1)ccc(c2)F)O	Nebivolol HCl	3.66813
O=C(C1NC(=O)N(C1)c1ccccc1)NCC1CC1		3.6592
COc1ccc2c(c1)n(CC(=O)O)c(c2C(=O)c1ccc(cc1)Cl)C	CLOMETACIN	3.65711
C=CCN1Cc2ccccc2c2c(C1)cccc2	AZAPETINE	3.65606
CCOC(=O)[C@@H](N[C@H]1CS[C@@H](CN(C1=O)CC(=O)O)c1cccs1)CCc1ccccc1	temocapril	3.65414
O=C(C1CCN(CC1)C(=O)C)N1CCC(CC1)c1ccccc1		3.65243
N[C@@H]1CC[C@H](CC1)N[C@@H]1C[C@H]1c1ccccc1	ORY-1001	3.65185
COc1cc2c(NCCCCCO[N+](=O)[O-])ncnc2c(c1OC)OC	KT 1	3.65118
n1ccc(cc1)Nc1ccc(cc1)NCCc1c[nH]c2c1cccc2	serdemetan	3.64661
C/C(=C\CSc1ccccc1C(=O)N)/CC/C=C(/CCC=C(C)C)\C	S-trans,trans-Farnesylthiosalicylamide	3.64471
COc1ncc2c(c1)CCC1C2NCC1	SIB 1663	3.63881
COc1cc(ccc1NC(=O)Nc1ccccc1C)CC(=O)N[C@H](c1noc(c1)CCC(=O)O)CC(C)C	CP-664511	3.63835
O=C([C@@H](NC(=O)C1CCCCN1C(=O)[C@@H](Cc1ccccc1)N)CCCN=C(N)N)Nc1ccc(cc1)[N+](=O)[O-]	NXN-188	3.63719
COc1ccc2c(c1)ncnc2N1CCc2c(C1)cccc2		3.63546
Cc1nccn1Cc1ccccn1	NDD-094	3.63436
O=C(C(C)(C)C)N1CCC(CC1)n1c(=O)[nH]c2c1cccc2		3.63049
O=C(Nc1nc(cn1C)O)Nc1cccc(c1)Cl	fenobam	3.62715
OCCn1ncc(c1)c1cnc2c(n1)n(nn2)Cc1ccc2c(c1)cccn2	PF-4217903	3.62616
CC(C(N)(C)C)c1ccccc1	PENTOREX	3.62544
C/C(=C\CCC(=O)OC/C=C(/CCC=C(C)C)\C)/CC/C=C(/CCC=C(C)C)\C	GEFARNATE	3.62427
N#CC1=C(N)Oc2c(C1c1cc(Br)c(c(c1)OC)OC)ccc(c2N)N	Crolibulin	3.62045
OCC(N(C)C)(Cc1ccc(c(c1)Cl)Cl)C	CERICLAMINE	3.62023
OCCCCO[N+](=O)[O-]		3.61746
O=C(c1ccc(cc1)F)NC1Cc2c(C1)cccc2	AVE-9488	3.61717
CNC(=O)c1ccccc1Sc1ccc2c(c1)[nH]nc2/C=C/c1ccccn1	Axitinib	3.61628
N[C@@H]1CN(C[C@H]1C)c1nc2c(cc1F)c(=O)c(cn2C(C)(C)C)C(=O)O	BMY-41802	3.61063
Nc1ccn(c(=O)n1)[C@H]1[C@H](O)[C@@H](C(=C1F)CO)O	RX-3117	3.60622
c1ccc(nc1)CN(Cc1ccccn1)CCN(Cc1ccccn1)Cc1ccccn1	T1210	3.59852
COc1ccc(cc1C(=O)NCCc1ccc(cc1)S(=O)(=O)NC(=O)NC1CCCCC1)Cl	Glyburide10238-21-8	3.5951
OC[C@H]1O[C@H]([C@@H]([C@@H]1O)O)n1cnc2c1ncnc2NCC(c1ccccc1)c1ccccc1	CI-936	3.59413
COc1cc(cc(c1OC)OC)C(=O)OCCCN1CCCN(CC1)CCCOC(=O)c1cc(OC)c(c(c1)OC)OC	dilazep	3.59366
C=CCN1CCc2c(C(C1)c1ccccc1)cc(c(c2)O)O	SKF 77434	3.59003
COCCN1CCN(CC1)CC1CCN(C1=O)c1ccc(cc1)Cl	MS-377	3.58901
O[C@H]1C[C@H](O)C(=C)/C(=C\C=C\2/CCC[C@]3([C@H]2CC[C@@H]3[C@@H](CC[C@H](C(C)C)O)C)C)/C1	Tacalcitol	3.58797
Cc1ccc(cc1)CN1CCCC21Cc1ccccc1CNC2=O		3.58669
c1ccc(cc1)Oc1nncc2c1cccc2	D 21151	3.58638
CCCCCCCC/C=C\CCCCCCCC(=O)NCc1ccc(c(c1)OC)OCCN	NE-21610	3.58062
CCCCNC(=O)NS(=O)(=O)c1ccc(cc1)N	CARBUTAMIDE	3.5769
O=C(NC1C(=O)N(c2ccccc2)c2c(N(C1=O)CC(=O)N(c1ccccc1)C(C)C)cccc2)Nc1cccc(c1)C(=O)O	GW 7854	3.57391
CC[N+](CCN(CC[N+](CC)(C)C)C)(C)C	AZAMETHONIUM BROMIDE	3.57053
Cc1csc(n1)Nc1nc2c([nH]1)cccc2	BAYP1455	3.56809
CCCN1CCCCC21CN(Cc1c(C2)cccc1)C(=O)CNC(=O)C		3.56647
CCCCNc1ccc(c(c1)O)C(=O)OCC[NH+](CC)CC		3.56476
CCN(CCc1ccc2c(c1)C(=O)c1ccccc1CO2)O	P 8892	3.56445
Nc1ncc(nc1Nc1ccc2c(c1)ccn2)c1cccnc1		3.56368
CC(=O)c1ccc(c(c1O)O)O	GALLACETOPHE	3.55774
OC(=O)c1ccc2c(c1)[nH]nn2	CBT-1	3.55649
CCN1Cc2c(C1=O)cnc(n2)N1CCNCC1		3.55536
CC(c1ccc(cc1)O)(CC(C)(C)C)C	TYLOXAPOL	3.55454
OC(=O)CC[C@@H](C(=O)Nc1ccccc1)NC(=O)[C@H](Cc1ccccc1)CSC1OC(=O)c2c1cccc2	ONO-9902	3.55215
CCN(CCOC(=O)c1ccc(cc1Cl)N)CC	Chloroprocaine hydrochloride	3.55033
Clc1ccc(cc1)c1csc(n1)NC(=O)Cn1cnc2c1n(C)c(=O)n(c2=O)C		3.54959
OCC(=O)[C@@]1(O)[C@@H](C)C[C@@H]2[C@]1(C)C[C@H](O)[C@]1([C@H]2CCC2=CC(=O)C=C[C@]12C)F	Betamethasone (Celestone)	3.54624
COc1cc(C)nc(c1CNC(=O)c1c(C)n(c2c1cccc2)[C@@H](C1CCN(CC1)CC(F)(F)F)C)O	CPI-1205	3.54048
CCN(CCCC(Nc1ccnc2c1ccc(c2)Cl)C)CC	chloroquine, DualTPharma	3.54004
OCC(NC(=O)c1c(I)c(C(=O)NC(CO)CO)c(c(c1I)NC(=O)[C@@H](O)C)I)CO	iopamidol	3.53762
Clc1sc2c(c1c1ccc3c(c1[O-])CCCC3)c([O-])c(c(=O)n2)c1ccccc1	PXL-770	3.53702
Cc1cn(c(n1)C)c1cc(C)c2c(c1)ccc(=O)[nH]2	NANTERI	3.53637
N[C@H]1CCCC[C@H]1Nc1nc(c2cnn(c2)C)c2c(c1F)CNC2=O	TAK-659	3.53626
Oc1nc(=O)n(cc1C)CCCCN1CCN(CC1)c1cc(nc(n1)C(C)(C)C)C(F)(F)F	A-690344	3.53328
OC(=O)C(Cc1ccc(cc1)OCCN(c1nc2c(o1)cccc2)C)OCC(F)(F)F	SB 219994	3.53104
O=C(N1CC(=O)N2C(C1)c1ccccc1CC2)C1CCCCC1		3.52936
SC[C@@H](C(=O)N[C@H](C(=O)N[C@H](C(=O)O)CO)CC(=O)O)NC(=O)[C@H](C(C)C)NC(=O)[C@@H]1CCCN1C(=O)[C@@H](NC(=O)[C@@H](NC(=O)CNC(=O)[C@@H](NC(=O)[C@H](CC(=O)N)N)CC(C)C)CCC(=O)O)Cc1ncnc1	ADESH	3.5215
OC[C@H]1O[C@H](S[Au])[C@@H]([C@H]([C@@H]1O)O)O	Aurothioglucose	3.52133
OC(=O)[C@H](c1cc(Cl)c(c(c1)c1ccc(cc1)C(F)(F)F)OCC(F)(F)F)CC1CCC1	EVP-0962	3.52007
CN([C@H]1CCCC[C@@H]1NC(=O)c1ccc(cc1)Br)C	bromadoline	3.51977
O=C(c1ccc(cc1)n1cnc2c(c1=O)cccc2)NC1CC1		3.51925
CC#CC1(CCCCC1)OCC(N1CCCC1)COCC(C)C	DOPROPIDIL	3.51884
ClCCn1nnc2n(c1=O)cnc2C(=O)N	Mitozolomide	3.51823
OC(=O)CCCc1cc(F)ccc1[C@H](N(S(=O)(=O)c1ccc(cc1)Cl)c1cc(F)ccc1F)C	BMS-299897	3.51642
O=C(c1cccc(c1)CCNC(=O)[C@@]12CC[C@H]([C@@H]2[C@@H]2[C@](CC1)(C)[C@]1(C)CC[C@@H]3[C@]([C@H]1CC2)(C)CC[C@@H](C3(C)C)O)C(=C)C)NCc1ccc(cn1)C(=O)NCCc1ncnc1	MPC-9055	3.51402
CCCCCCc1ccc(cc1)N=C1SCCS1	MDL 19301	3.51096
O=C1NCC[C@@H]2[C@H](C1)CCN(C2)C(=O)C1CCCC1		3.51077
CN(CCNc1nccc(n1)NCc1ccc(cc1)CNc1nc(Cl)ncc1F)C		3.50915
CCOC(=O)Nc1cccc2c1CN(C)CC2c1ccc(cc1)Cl	GASTROPHENZINE	3.50798
COc1ccc(cc1)OC1CN(C1)Cc1ccc(cc1)C#N		3.50742
N#Cc1ccc2c(c1)CN([C@@H](CN2Cc1nc[nH]c1)Cc1ccccc1)S(=O)(=O)c1cccs1	BMS-214662	3.50742
COc1ccc2c(c1)[C@]1(CC1c1ccc3c(c1)[nH]nc3/C=C/c1ccc(cc1)CN1C[C@H](C)O[C@@H](C1)C)C(=O)N2	CFI-400945	3.50632
Oc1ccc(cc1)CCCCNC[C@@H](c1ccc(c(c1)O)O)O	ARBUTAMINE HYDROCHLORIDE	3.50608
Clc1ccc(cc1)C(=O)N1CC2(CCN(CC2)C2CCCCC2)Cc2c1cccc2		3.50571
CC[C@@H]1C[C@H](N(C(=O)C)Cc2cc(cc(c2)C(F)(F)F)C(F)(F)F)c2c(N1C(=O)OC(C)C)ccc(c2)C(F)(F)F	CP-532623	3.50039
CC(=O)O[C@@H]1C[C@@H]2[C@]([C@@]1(O)C(=O)COC(=O)C)(C)C[C@@H]([C@]1([C@H]2CCC2=CC(=O)C=C[C@]12C)F)O	triamcinolone acetate, Foamix	3.4998
O=C(Nc1cnc2c(c1c1ccccc1Cl)cc(c(c2)C)C)Nc1ccc(cc1F)F	TMP 153	3.49966
CCc1nc2c(n1Cc1ccc(cc1)c1ccccc1S(=O)(=O)NC(=O)c1ccccc1)nc(cc2C)C	L 159282	3.49658
NC1=NC2(CO1)CCc1c(C2)c(Cl)ccc1	S 18616	3.49636
Clc1ccc(cc1)C[C@@H]1C[C@H](CCN1C(=O)c1cc(cc(c1)C(F)(F)F)C(F)(F)F)NC(=O)c1ccnc2c1cccc2	AV-608	3.4956
N#Cc1cnn(c1)c1ccc(cc1F)N1C[C@@H](OC1=O)CNC(=O)C	PNU 172576	3.49555
CCN(CCSCC(=O)O[C@@H]1C[C@@](C)(C=C)[C@@H](O)[C@@H]([C@]23[C@H]([C@@]1(C)[C@H](C)CC2)C(=O)CC3)C)CC	Tiamulin	3.49526
OC(=O)CCC/C=C(/c1cccnc1)\c1ccc(cc1)CCNS(=O)(=O)c1ccc(cc1)Cl	SAMIXOGREL	3.49499
Clc1ccc(cc1)Cn1cc(c2c1cccc2)C(=O)C(=O)Nc1ccncc1	indibulin, nanoparticle	3.4933
OCCC1CCN(CC1)CCCN1c2ccccc2Sc2c1cc(cc2)C(=O)C	PIPERACETAZINE	3.49225
OC(=O)C1Oc2c(C1)c1onc(c1cc2Cl)c1ccccc1	AA 193	3.49153
CNC(=O)c1nccc(c1)Oc1ccc(c(c1)F)NC(=O)Nc1ccc(c(c1)C(F)(F)F)Cl	Regorafenib	3.4912
Clc1ccc2c(c1)c(nc(=O)n2CC(F)(F)F)c1ccccc1	fluquazone	3.4889
NS(=O)(=O)OC[C@]12OC[C@@H]3C([C@@H]2OC(O1)(C)C)OC(O3)(C)C	topiramate	3.4879
CCN1CCN([C@@H]2[C@@H]1c1c(C)c3c(n1CC2)cccc3)C(C)C	atiprosin	3.48733
CCCCCCCCC1OOC(O1)CCCCCCCC(=O)OC	ALPHAMIR	3.48601
CC(CCCC(C1CCC2[C@]1(C)CCC1C2CCC2[C@]1(C)CC[C@@H](C2)N1CC(C1)OS(=O)(=O)C)C)C	Sch-19457	3.48387
CN(c1ccc2c(c1)Sc1c(N2)ccc(c1)N(C)C)C	Leuco methylthioninium salt	3.48186
[O]#C[Fe](C#[O])(C#[O])(C#[O])C#[O]	Carbonyl iron	3.47632
C=C(c1ccc(cc1)C1CCCCC1)C1COC2(OO1)C1CC3CC2CC(C1)C3	CDRI-99/411	3.47255
COCCOc1cnc2c(c1)c(=O)n(cc2)[C@@H](c1nnc2n1cc(cc2F)c1cnn(c1)C)C	AMG-337	3.47106
Clc1ccc(cc1)C(c1ccccc1)OC1CC2CCC(C1)N2C	3-ALPHA-[(4-CHLOROPHENYL)PHENYLMETHOXY]TROPANE HCL	3.47072
CC(=O)N[C@H]1CSSC[C@H](NC(=O)[C@@H](NC(=O)[C@@H](NC(=O)[C@@H](NC1=O)Cc1cnc[nH]1)C)C(C)C)C(=O)N	Exherin (trifluoroacetate)	3.46842
CCOC(=O)c1cc(CN(CC)CC)c(c(c1)Br)N		3.46717
O=C1NC(=O)C(N1C)O	NZ-419	3.46655
OCC(=O)C1(O)CCC2C1(C)CC(=O)C1C2CCC2=CC(=O)C=CC12C	Prednisone	3.46577
CC(OC(=O)C1=C(C)NC(=C(C1c1ccc(cc1)[N+](=O)[O-])C(=O)OC(C)C)C)C		3.46355
CS(=O)(=O)N1CCN(CC1)Cc1cc2c(s1)c(nc(n2)c1cccc2c1cn[nH]2)N1CCOCC1	pictilisib	3.46214
Clc1ccc(cc1)Cc1[nH]c2c(n1)n(C)c(=O)n(c2=O)C		3.4602
CCCCC(=O)O[C@@]1(CC[C@@H]2[C@]1(C)C[C@H](O)[C@H]1[C@H]2CCC2=CC(=O)CC[C@]12C)C(=O)CO	Hydrocortisone valerate	3.45858
OC[C@H]1O[C@@H](Oc2ccccc2CO)[C@@H]([C@H]([C@@H]1O)O)O	Salicin	3.45712
Clc1ccc(cc1)Cn1c(CN2CCCC2)nc2c1cccc2	CLEMIZOLE HYDROCHLORIDE	3.45683
CCOc1cc(ccc1C1=N[C@@]([C@@](N1C(=O)N1CCN(CC1)CCCS(=O)(=O)C)(C)c1ccc(cc1)Cl)(C)c1ccc(cc1)Cl)C(C)(C)C	R-7112	3.45595
CCOC(=O)CCC(=O)OC1C(OC(CC1N(C)C)C)OC1C(C)C(OC2OC(C)C(C(C2)(C)OC)O)C(C)C(=O)OC(CC)C(C(C(C(=O)C(CC1(C)O)C)C)O)(C)O	Eryped1264-62-6	3.45514
COc1cc(ccc1c1cnco1)NC(=O)Nc1cccc(c1)CNC(=O)O[C@@H]1COCC1	Merimepodib	3.45483
CN[C@H](C(=O)N[C@H](C(=O)N1CCC[C@H]1c1scc(n1)C(=O)c1ccc(cc1)F)C1CCCCC1)C	LCL-161	3.45435
C[C@@H](CCC[C@]1(C)CCc2c(O1)c(C)c(c(c2C)O)C)CCC[C@@H](CCCC(C)C)C	Vitamin E	3.45425
NC(=O)N(CC1=Cc2c(OC1)ccc(c2)Oc1ccccc1)O	CGS-23885	3.44837
O[C@H]1CCCC[C@@H]1n1cnc2c(c1=O)cc(c1c2cccc1)Cc1ccc(nc1)C	MK-7622	3.44786
Nc1cccc(c1)CN1[C@H](Cc2ccccc2)[C@H](O)[C@H]([C@H](N(C1=O)Cc1cccc(c1)N)Cc1ccccc1)O	MOZENAVIR	3.44774
Clc1ccc(cc1)N1N=C2[C@H](CC1=O)CS(=O)c1c2cccc1	Y-22990	3.44619
NC(=N)NCC1COc2c(O1)cccc2	GUANOXAN	3.44541
Clc1ccc(cc1)OC(C(=O)OC(COC(=O)c1cccnc1)COC(=O)c1cccnc1)(C)C	Binifibrate	3.44457
OCCCNP(=O)(N(CCCl)CCCl)OCCCl	DEFOSFAMIDE	3.44049
OCCn1c(=O)c2ccc(cc2n(c1=O)C)C(F)(F)F		3.44001
OC(=O)CCC(=O)N1Cc2ccccc2CC2(C1)CCCCN2CCc1ccccc1		3.43997
Cc1ccc(c(c1)C)Nc1ncccc1C(=O)O		3.4394
O=C(C1CC[C@H](CC1)CNC(=N)N)Oc1ccc(cc1)C(C)(C)C	BATEBULAST	3.43832
CCCCCCCCCCCCCC[N+](CCC[Si](OC)(OC)OC)(C)C		3.43707
NCCc1c[nH]c2c1cc(OCC(=O)N[C@H](C(=O)NCC(=O)N)Cc1ccc(cc1)O)cc2	IS 159	3.43128
CCCC(=O)N1CC[C@@H]2[C@H](C1)CCNC(=O)C2		3.42986
CCOC(=O)CN1CCN(CC1)C(=O)/C=C/c1cc(OC)c(c(c1)OC)OC	cinepazet	3.42943
CCCCCCCCCCC(C(=O)Nc1c(OC)cc(cc1OC)OC)(C)C	CI-976	3.42651
C=CCC1(CC(=C)Br)C(=O)NC(=O)NC1=O	BRALLOBARBITAL	3.42457
O=C([C@@H](c1cscc1)C(=O)O)NC1C(=O)N2C1SC(C2C(=O)O)(C)C	Timentin	3.42287
CN[C@H](C(=O)N[C@H](C(=O)N([C@H]([C@@H](CC(=O)N1CCC[C@H]1[C@@H]([C@H](C(=O)N[C@H](c1nccs1)Cc1ccccc1)C)OC)OC)[C@H](CC)C)C)C(C)C)C(C)C	Monomethylauristatin D (MMAD)	3.4217
Cn1ncc(c1)c1ccc2n(n1)c(nn2)C(c1ccc2c(c1)cccn2)(F)F	JNJ-38877605	3.42071
CCCCCCCCc1ccc(cc1)CCC(CO)(CO)N	fingolimod hydrochloride	3.41803
OC(COc1cccc2c1c(Cl)c(n2)C)CNCCOc1ccccc1	indopanolol	3.41378
OCC(=O)[C@@]1(O)CC[C@@H]2[C@]1(C)C[C@H](O)[C@H]1[C@H]2C[C@@H](C2=CC(=O)C=C[C@]12C)F	FLUPREDNISOLONE	3.41112
O=C(N1CCCC1C(=O)N1CCC(CC1)N1Cc2c(C1=O)cccc2)N(C)C		3.40963
C[C@@H](N(CC#C)C)Cc1ccc(cc1)F	parafluoro-selegiline	3.40635
N#Cc1ccccc1/C=C/C=C/C(=O)N1CCN(CC1)c1ccccn1	F-16618	3.40593
O=C(C1CCCN1Cc1ccc(cc1)c1cc(C)cc(c1)C)NCc1ccc2c(c1)OCO2		3.40457
NCCCC[C@@H](C(=O)N[C@@H](C(=O)O)CCC(=O)N1[C@H]2CCCC[C@H]2C[C@H]1C(=O)O)NC(=O)c1cccnc1	DU-1777	3.4015
CC(CCc1ccc(cc1)O)NCCc1ccc(c(c1)O)O	dobutamine	3.40056
CCCC/N=C(\c1ccccc1Cl)/c1cc(Cl)ccc1O	Fengabine	3.40013
Cc1ccc(c(c1)NC(c1c(Cl)cccc1Cl)C(=O)N)C(=O)C	Loviride	3.39938
CO[C@@H]1[C@@H](O)[C@@H](O[C@H]2[C@@H](O[C@@H]([C@@H]([C@@H]2O)O)C)Oc2cccc3c2c2oc(=O)c4c5c2c(c3O)c(=O)oc5ccc4C)O[C@@H]([C@@H]1O)C		3.39781
CC[C@@H]1/C=C/C=C/C[C@H](C)[C@@H](O)[C@](C)(O)C(=O)[C@H](C)[C@@H](O)[C@H](C)C(=O)[C@@H]([C@H]([C@@H](/C=C/C(=O)O[C@H]2[C@H]([C@@H](CC1)O[C@]1(O[C@H](C[C@@H](O)C)[C@@H](CC1=O)C)[C@@H]2C)C)C)O)C	Oligomycin B	3.39781
CCCCCCCCCCCC(=O)c1ccc(cc1)OCC[N+](Cc1ccccc1)(C)C	LAURALKONIUM CHLORIDE	3.39641
C#CC1(CCCCC1)OCC(CN1CCN(CC1)c1ccccc1OC)O	MOCIPRAZINE	3.39385
COc1cc(OC)ccc1C(=O)CC(=O)C		3.39358
[O-][I](=O)=O	CALCIUM IODATE	3.3912
O=NSC[C@@H](C(=O)NCC(=O)O)NC(=O)CC[C@@H](C(=O)O)N	S-Nitrosoglutathione	3.39066
N#Cc1ccccc1CN1CCSC1=O	KR 6346	3.39027
Clc1ccc(cc1)C(=O)NC1CCCN(C1)Cc1cccc(c1)c1ccc(c(c1)Cl)C		3.3894
CCC(C(n1sc2c(c1=O)cccc2)C(=O)O)C	PD-161374	3.38876
O=C(NC(=O)c1c(F)cccc1F)Nc1cc(Cl)c(cc1Cl)OC(C(C(F)(F)F)F)(F)F	Lufenuron	3.38693
CC(=O)NC[C@H]1CN(C(=O)O1)c1ccc(c(c1)F)N1Cc2c(C1)cccn2	RWJ-337813	3.37702
CSCC[C@@H](C(=O)N[C@H](C(=O)N[C@H](C(=O)N)Cc1ccccc1)CC(=O)O)NC(=O)[C@H](Cc1c[nH]c2c1cccc2)NC(=O)CNC(=O)C([C@H](O)C)NC(=O)[C@@H](NC(=O)[C@@H](NC(=O)[C@@H](NC(=O)[C@@H]1CCC(=O)N1)CCC(=O)N)CC(=O)O)Cc1ccc(cc1)OS(=O)(=O)O	ceruletide, Fukuoka	3.37661
N#Cc1ccc(cc1)OC[C@@](C(=O)Nc1ccc(c(c1)C(F)(F)F)C#N)(O)C	enobosarm	3.37624
COc1ccccc1CCC(=O)Oc1cccc2c1cccc2		3.37423
CCCc1nn(c2c1[nH]c(nc2=O)c1cc(ccc1OCC)S(=O)(=O)N1CCN(CC1)CCO)C		3.37252
O[C@H](COc1ccc(cc1)CCC(=O)OC[C@@H]1COC(O1)(C)C)CNCCNC(=O)N1CCOCC1	landiolol hydrochloride	3.37252
OCC(C(=O)NC(C(=O)NC(C(=O)NC(C(=O)NC(C(=O)N1CCCC1C(=O)NC(C(=O)N)C)CCCCNC(C)C)CC(C)C)CCCCNC(=O)c1cccnc1)CCCCNC(=O)c1cccnc1)NC(=O)C(NC(=O)C(NC(=O)C(Cc1ccc2c(c1)cccc2)NC(=O)C)Cc1ccc(cc1)Cl)Cc1cccnc1	Iturelix	3.37131
Nc1nc(c(s1)c1ccccc1)N		3.36873
COC(=O)C[C@@H]1N(CCN(C1=O)CC(=O)O)C(=O)CNC(=O)c1ccc(cc1)C(=N)N	TAK-029	3.36857
OCCC1=CC[C@H](C[C@@H]1O)C(O)(C)C	CO-1408	3.3674
CC[C@@H]([C@@H]1NC(=O)[C@H](CCC(=O)N)NC(=O)[C@H](CC(=O)N)NC(=O)[C@H](CO)NC(=O)[C@@H](NC(=O)[C@H](CSSC[C@H](NC1=O)C(=O)O)N)CC(=O)N)C	802-2	3.367
OC[C@@H](C(=O)Nc1cc(/C=C\c2cc(OC)c(c(c2)OC)OC)ccc1OC)N	AVE-8062	3.36679
CCOC(=O)c1cnc([nH]c1=O)Nc1ccc(cc1)OC		3.36636
CC(=O)Nc1ccc(cc1)OCCOC(=O)c1ccccc1OC(=O)C	ETERSALATE	3.36585
O=C1C=C[C@]2(C(=C1)[C@@H](C)C[C@@H]1[C@]2(F)[C@@H](O)C[C@]2([C@H]1CC[C@]2(O)C(=O)C)C)C	fluorometholone, Allergan	3.36579
COc1cc2c(cc1OC)ncnc2n1nc(nc1N)c1ccccn1	CP-466722	3.36505
S=C1CN=C(c2c(N1)ccc(c2)Cl)c1ccccc1		3.36454
O[C@@H](COc1ccccc1C1CCCC1)CNC(C)(C)C	penbutolol	3.36241
CCOC(=O)[C@@H](N[C@H](C(=O)N1CCC[C@H]1C(=O)OCCCO[N+](=O)[O-])C)CCc1ccccc1	NCX-899	3.35606
CC(=O)N1Cc2ccccc2CC2(C1)CCCN2CCc1ccccc1		3.35564
CNC1Cc2ccccc2N(c2c1cccc2)C	METAPRAMINE	3.35509
OCCCN1CCc2c1c(cc(c2)C[C@H](NCCOc1ccccc1OCC(F)(F)F)C)C(=O)N	silodosin	3.3523
N#Cc1ccc2c(c1)N(CCCN(C)C)c1ccccc1CC2	CIANOPRAMINE	3.3512
COc1cccc(c1)C(=O)NC[C@@H]1CC[C@H]2C[C@@H]1C2(C)C		3.35059
CN(CCOC1=Cc2ccccc2Sc2c1cc(Cl)cc2)C	zotepine	3.34961
COc1ccc2c(c1)c(C(=O)CN1CCN(CC1)c1ccccc1OC)c([nH]2)C		3.34824
CC(=N)NCCS(=O)(=O)C[C@@H](C(=O)O)N	GW-273629	3.34554
Fc1ccc(c(c1)Cn1c(cc2c1c(=O)n(C)c(=O)n2C)N1CCCC(C1)(C)N)C	DSP-7238	3.34431
O=C(c1ccc(cc1)OCc1ccccc1)N1CCN(CC1)c1nc(N)c2c(n1)cccc2		3.34098
CN(CCNC(=O)c1nc(Cl)c(nc1N)N)CCNCc1c(O)c(Br)cc2c1CCC2(C)C	ZM 224832	3.34024
Cn1c(=O)n(C)c2c(c1=O)n(CCCN1CCC(CC1)OC(c1ccccc1)c1ccccc1)cn2	WY 49051	3.33914
Oc1c(I)cc2c(c1I)Oc1c(C32OC(=O)c2c3c(Cl)c(Cl)c(c2Cl)Cl)cc(c(c1I)O)I	Provecta	3.33721
CCN(C(=O)N[C@@H]1CN(C)C2C(C1)c1cccc3c1c(C2)c[nH]3)CC	Terguride	3.33682
CCOc1ccc(cc1c1[nH]c(=O)c2n(n1)c(CCC)nc2C)S(=O)(=O)N1CCN(CC1)CC	vardenafil hydrochloride	3.33541
CCNCCCNCCCNCCCNCC	BENSPM	3.33448
O=C(c1ccc(cc1)OCCCCc1ccccc1)Nc1cccc2c1oc(cc2=O)c1[nH]nnn1	pranlukast	3.3333
CO[C@@H]1C[C@@H](CC[C@H]1OC(=O)C(CO)(CO)C)C[C@H]([C@H]1OC(=O)[C@@H]2CCCCN2C(=O)C(=O)[C@]2(O)O[C@@H](CC[C@H]2C)C[C@H](OC)/C(=C/C=C/C=C\[C@H](C[C@H](C(=O)[C@@H]([C@@H](/C(=C/[C@H](C(=O)C1)C)/C)O)OC)C)C)/C)C	Temsirolimus	3.33325
COc1cc2c(cc1OCCCN1CCCCC1)ncnc2N1CCN(CC1)C(=O)Nc1ccc(cc1)OC(C)C	tandutinib	3.33207
COc1cc(CNCC(COc2ccc3c(c2)ccc(=O)[nH]3)O)ccc1OC	TOBORI	3.32866
COC(c1ccccc1)(c1ccccc1)C(=O)OC(CN(C)C)C		3.32865
OC[C@H]1O[C@H](C[C@@H]1F)n1cc(Cl)c(=O)[nH]c1=O	RALURIDINE	3.32723
COC(=O)c1ccc2c(c1)NC(=O)/C/2=C(/c1ccccc1)\Nc1ccc(cc1)N(C(=O)CN1CCN(CC1)C)C	nintedanib	3.32619
COc1cc2CCN(c2cc1N1C[C@H](C)N[C@@H](C1)C)C(=O)c1ccc(cc1)c1ccc(cc1C)c1noc(n1)C	SB-616234-A	3.32453
Ic1ccc(c(c1)F)Nc1c(ccc(c1F)F)C(=O)N1CC(C1)(O)[C@@H]1CCCCN1	Cobimetinib	3.32195
NC(=N)NN=Cc1ccccc1Cl	IFB-088	3.32072
C=C[C@@H]1C[C@]1(NC(=O)[C@@H]1C[C@@H]2CN1C(=O)[C@@H](NC(=O)O[C@@H]1C[C@H]1CCCCCc1c(O2)nc2cc(OC)ccc2n1)C(C)(C)C)C(=O)NS(=O)(=O)C1CC1	MK-5172	3.31685
CN1CCN(CC1)CCCN1c2ccccc2Sc2c1cc(cc2)C(F)(F)F		3.31627
OC(=O)[C@@H]1NCCN(C1)C/C=C/P(=O)(O)O	Midafotel	3.31558
SCC(C(=O)NC(C(=O)O)Cc1ccc(cc1)c1nccs1)Cc1ccccc1	GW-660511	3.31294
CC(C(=O)NCc1cnc(c(c1)C(=O)Nc1nc(c(n1)C)c1ccc(cc1)C(F)(F)F)C(F)F)C	LY-3023703	3.31214
OC(=O)Cc1c(c2ccc(cc2)Cl)c(c2n1CC(C2)(C)C)c1ccccc1	licofelone	3.31123
O[C@H]1C[C@H](O)C(=C)/C(=C\C=C\2/CCC[C@]3([C@H]2CC[C@@H]3[C@@H](CCCC(O)(C)C)C)C)/C1	CALCITRIOL	3.30994
COc1cc(cc(c1OC)OC)[C@H]1[C@H]2C(=O)OC[C@@H]2[C@H](c2c1cc1OCOc1c2)O	Podofilox	3.30903
CC[C@@H]([C@@H](C(=O)N[C@H](C(=O)N1CCC[C@H]1C(=O)N[C@H](C(=O)O)Cc1ccccc1)Cc1nc[nH]c1)NC(=O)[C@@H](NC(=O)[C@H](C(C)C)NC(=O)[C@@H](NC(=O)[C@H](CC(=O)O)N)CCCNC(=N)N)Cc1ccc(cc1)O)C	Human angiotensin II	3.30734
O=C([C@@](C(F)(F)F)(O)C)Nc1cccc2c1C(=O)c1sccc1CS2(=O)=O	KW-7158	3.3038
Fc1cccc(c1)c1nn(c(=S)n1C)C	Suritozole	3.3037
Fc1ccc(cc1)c1ccc([nH]1)CN1CCN(CC1)c1cccc2c1occ2	ELOPIPRAZOLE	3.29704
CN1C(=O)CC(C1=O)(C)c1ccccc1	Methsuximide	3.29232
CCn1c2ccccc2c2c1C(C)(SCC2)CCN(C)C	tandamine	3.29209
O[C@H]1CN([C@@H](C1)C(=O)N[C@H](C(=O)NCC(=O)N[C@H](C(=O)N)Cc1cnc2c1cccc2)CCCNC(=N)N)C(=O)[C@H](Cc1ccc(cc1)F)N	NEMIFITIDE	3.29119
NC(=O)N/N=C\1/C=C2C(O)CN(C2=CC1=O)C(C)C	iprazochrome	3.28938
Clc1ccc2c(c1)C1(OCCN1CC(=O)N2C)c1ccccc1F		3.28608
CC(=O)N(CCCP(=O)(O)[O-])O	FR 900098	3.28072
COc1cccc(c1)c1ccc(c(c1)F)NC(=O)C1=C(CCC1)C(=O)O	vidofludimus	3.27926
O=C1OC[C@]2([C@H](C1)CC[C@@H]1[C@@H]2CC[C@]2([C@H]1CC[C@]2(C)O)C)C	Oxandrolone	3.27492
CN1CCN2C(C1)c1cccn1Cc1c2cccc1	APTAZAPINE	3.27442
Fc1cccc(c1)CN(c1ccc(cc1)OCc1ccc2c(n1)cccc2)Cc1ccc(cc1)C(=O)O	ETH 615	3.27166
O=C(C(C)(C)C)Nc1c(C)cc(c2c1N(CC2)CC1CC1)C		3.27084
C(NCCC(c1ccccc1)c1ccccc1)CCSc1ccccc1	tiopropamine	3.27008
CNC(=O)c1ccc2c(c1)n(cc2)C1CCN(CC1)CCc1c(OC)ccc2c1OC(C)(C)CC2=O	E-2110	3.26968
O=C(c1cccc2c1oc(c1ccccc1)c(c2=O)C)OCCN1CCCCC1	flavoxate	3.26797
CO[C@H]1CC=C2[C@]3(C1)N(CC2)CCC1=C3CC(=O)OC1	Dihydro-beta-erythroidine	3.26762
[NH-]c1on[n+](c1)N1CCOCC1	LINSIDOMINE	3.26239
COc1ccc(cc1)Cc1cccc(c1)c1c(=O)[nH]c2c(c1OC(=O)C)ccc(c2)Cl	AcL-703	3.26211
CCCCCC(c1ccc(cc1)N1[C@@H](CCCc2ccc(s2)C(=O)O)CCC1=O)O	Aganepag	3.26134
O=C1NC2(CCN(CC2)CC2CC2)Oc2c1cccc2		3.2612
OC(c1ccccc1)C(=O)OC1CC2CCC(C1)[N+]2(C)CC(=O)c1ccccc1	PHENACTROPINIUM CHLORIDE	3.25981
OC(=O)CC1COc2c(C1)cc(cc2)NC(=O)c1ccc(cc1)C(=N)N1CCOCC1	MS 28168	3.25351
CCCN1CCC[C@@H](C1)c1cccc(c1)C#N	DS 121	3.25151
OCCN1CCN(CC1)CCCN1c2ccccc2Sc2c1cc(Cl)cc2		3.24945
O=C(CN(C(=O)c1ccncc1)Cc1ccccc1)Nc1ccc(cc1)c1csc(n1)N	BILS 45 BS	3.24738
CCOC(=O)CCN(c1scc(n1)c1ccc(cc1)/C(=N\C(=O)OCC)/N)C1CCN(CC1)CC(=O)OCC	SR 121787	3.2467
O[C@@H]1[C@@H](N2CCCC2)c2cc(ccc2OC1(C)C)C#N	Pharmaprojects No. 557	3.24474
NCCC(=O)N1CCCC2(C1)Cc1ccccc1CN2C(=O)c1ccc(cc1)OC		3.24439
CN(CCCn1c2CCCCCCc2c2c1cccc2)C	Iprindole	3.24439
O=C1COc2c(CN1C1CCC1)ccc(c2)OC1CCN(CC1)C1CCC1	SUVN-G3031	3.24432
CC/C=C\C/C=C\C/C=C\C/C=C\C/C=C\C/C=C\CCC(=O)OCC	omega-3-acid ethyl esters, Pronova	3.24395
C[C@@H](CCC[C@]1(C)CCc2c(O1)c(C)c(c(c2C)OC(=O)C)C)CCC[C@@H](CCCC(C)C)C	Vitamin E acetate	3.24303
O=C1C=C[C@]2(C(=C1)CC[C@@H]1C2CC[C@]2(C1CCC(=O)O2)C)C	Testolactone	3.24226
NC(=O)OCC[N+](C)(C)C	CARBACHOL	3.24216
CCCCn1c2nn(c(c2c(=O)n(c1=O)CCC)NC)C(=O)OC	AA-2379	3.23932
ClCCCCC(=O)NNC(=O)N1Cc2ccccc2Oc2c1cc(Cl)cc2	pinadoline	3.23388
CC[C@H](c1ccc(o1)C)NC1=C(C(=O)C1=O)Nc1cccc(c1O)C(=O)N(C)C	Navarixin	3.23361
OC(COc1cc(Cl)ccc1Cl)CNC(C)(C)C	cloranolol	3.23169
OC(=O)CN1C(=O)[C@H](CCc2c1cccc2)NC(=O)C1(CCCC1)CC(C(=O)O)CCc1ccccc1	KC-12615	3.22707
NC(=O)C1CCN(CC1)C(=O)Cn1c(=O)sc2c1cc(Cl)cc2		3.22701
CCCNC(=O)c1cn2c(c1C)c(ncn2)Nc1cc(ccc1C)C(=O)NC1CC1	BMS-582949	3.2266
O=C1/C(=C/c2cn3c(n2)COCC3)/[C@@H]2N1C(=CS2)C(=O)[O-]	BLI 489 Hydrate	3.22493
I[Zn]I	ZINC IODIDE	3.22487
CC/C=C\C/C=C\C/C=C\C/C=C\C/C=C\CCCC(=O)OCC	ethyl icosapentate	3.2236
Oc1ccc(cc1)OCc1ccccc1	MBEH	3.22258
O=C1C=CC2(C(=C1)[C@@H](F)C[C@@H]1[C@]2(F)[C@@H](O)CC2([C@H]1C[C@H]([C@]2(O)C(=O)SC1CCOC1=O)C)C)C	Zoticasone	3.22078
OC(=O)/C=C\c1ccccc1	Cinnamic acid	3.21868
O=c1oc2c(c(=O)n1c1ccccn1)N(C)S(=O)(=O)c1c2cccc1	droxicam	3.2174
CC(N(C(=O)CN1c2ccccc2n2c([C@@H](C1=O)Cc1c[nH]c3c1cccc3)nnc2c1ccccc1)Cc1ccccc1)C	CE-326597	3.21624
OCC([C@H](C(=O)NCCC(=O)O)O)(C)C	PANTOTHENIC ACID	3.21342
C=CCNC(=O)/C=C/c1ccccc1		3.21102
O=C([C@@H]1N2C(=O)[C@H]([C@H]2SC1(C)C)/N=C/N1CCCCCC1)OCOC(=O)C(C)(C)C	Pivmecillinam hydrochloride	3.2102
CO/N=C\1/C(C)C[C@@](C)(O)[C@H](OC2OC(C)CC([C@H]2O)N(C)C)[C@@H](C)[C@H](OC2O[C@@H](C)C([C@](C2)(C)OC)O)C(C(=O)O[C@@H]([C@@](C(C1C)O)(C)O)CC)C	Lexithromycin	3.20987
COc1ccc(cc1)N1CCN(CC1)C(=O)CCCc1c[nH]c2c1cccc2		3.20892
CC/C=C\C/C=C\C/C=C\C/C=C\C/C=C\CCCCOC(C(=O)O)CC	Icosabutate	3.20874
Clc1ccc(cc1)C12N(CCN1C(=O)c1c2cncc1)C(=O)c1cccnc1	BTA-9881	3.20595
CC(N[C@H]1C=CC(C1)(c1ccccc1)c1ccccc1)(C)C	PH-CBR-2016-001-HVAC-04652-0I	3.20378
CCC[C@@H]1O[C@H]2[C@](O1)(C(=O)S[C@@H]1CCOC1=O)[C@@]1([C@@H](C2)[C@@H]2C[C@H](F)C3=CC(=O)CC[C@@]3([C@]2([C@H](C1)O)F)C)C		3.20253
OC[C@H]1O[C@H]([C@@H]([C@@H]1O)O)n1cnc2c1ncnc2N[C@H]1CCC[C@@H]1O		3.20223
COc1cc2CCOC(c2cc1CN[C@H]1CCCN[C@H]1c1ccccc1)(C)C(F)(F)F	CJ-17493	3.20149
OCC[C@@H](c1ccc(cc1)Cl)NC(=O)C1(N)CCN(CC1)c1ncnc2c1cc[nH]2	AZD-5363	3.20023
N#C/C=C/1\c2ccc(cc2C(=Cc2c1cccc2)N1CCN(CC1)C)Cl		3.19812
Cc1cc(C)nc(n1)N1CC2C(C1)CN(C2)C(=O)c1c(F)cccc1n1nccn1	JNJ-42847922	3.19533
O=C(C1CN(C(=O)N1)C1CCCC1)Nc1ccc(cc1)F		3.19211
OC(=O)CCCN1CCC[C@H]1COc1ccc(cc1)Oc1ccc(cc1)Cl	DG-051	3.19163
Nc1ccc(cc1)SC[C@@H]1CO[C@](O1)(CCc1ccc(cc1)Cl)Cn1ccnc1	Azalanstat	3.19087
OB([C@@H](NC(=O)CNC(=O)c1cc(Cl)ccc1Cl)CC(C)C)O	Ixazomib	3.18942
COc1cc2c(cc1OC)CCN1[C@@H]2C[C@@H](O)[C@@H](C1)CC(C)C	(+)-alpha-Dihydrotetrabenazine	3.18867
CN(C1CC(c2c1cccc2)c1ccccc1)C	DIMEFADANE	3.1886
COc1cccc2c1C(=O)c1c(C2=O)c(O)c2c(c1O)[C@@H](OC1CC(N)C(C(O1)C)O)C[C@](C2)(O)C(O)C		3.18829
O[C@@H]1CC[C@]2([C@H](C1)CC[C@@H]1[C@@H]2CC[C@]2([C@H]1CC[C@@H]2C(=O)C)C)C	(3?,5?)-3-Hydroxy-pregnan-20-one	3.18732
CSCCC(C(=O)N)NC(=O)C(NC(=O)CNC(=O)C(NC(=O)C(Cc1ccccc1)N)Cc1ccccc1)CC(C)C		3.18539
OCC(=O)COC(=O)c1cncn1[C@@H](c1ccccc1)C	ABP-700	3.1789
N#Cc1ccc2c(c1)[C@@H](N(C(=O)C)OCc1ccccc1)[C@@H](C(O2)(C)C)O	Y-27152	3.17858
O=C([C@@H]1C[C@@]1(COc1cnc(nc1C)C)c1cccc(c1)F)Nc1ccc(cn1)F	Lemborexant	3.17694
CC(=O)NC[C@H]1CN(C(=O)O1)c1cc(F)c(c(c1)F)c1ccc(cc1)C(=O)C	PNU 172614	3.17671
CC(C[C@@H]([C@@H]([C@@H](NC(=O)C(CC(=O)N(CC(=O)N(CCc1ccccn1)C)CC1CCCCC1)Cc1csc(n1)N)CC1CCCCC1)O)O)C	BILA 2157 BS	3.17604
C=CC(=O)Nc1cc(Nc2nccc(n2)c2cn(c3c2cccc3)C)c(cc1N(CCN(C)C)C)OC	AZD-9291	3.17552
OCC(COc1ccc(cc1)CCOC(=O)C1=C(C)NC(=C(C1c1cccc(c1)[N+](=O)[O-])C(=O)OC)C)O	RS 93522	3.17482
CO/N=C(\C(=O)N[C@@H]1C(=O)N2[C@@H]1SCC(=C2C(=O)O)CSc1cnns1)/c1csc(n1)N	Cefuzonam	3.17462
CC(NC(C(c1ccc(cc1)O)O)C)CCc1ccccc1	nylidrin hydrochoride	3.17402
O=C(N1CCCC1)Cn1c2ccccc2c2c1nc(nc2N1CCCC1)N1CCCC1	PNU-142731A	3.17328
COc1ccc(cc1)C(c1ccccc1)OCCN1CCN(CC1)CCCC(=O)c1ccc(cc1)F	mobenzoxamine	3.16649
FC(c1cccc(c1)C1=CCN(CC1)CCc1ccc(cc1)c1ccccc1)(F)F	PALIRODEN	3.16638
OC(=O)CCC(C(=O)O)NC(=O)c1ccc(cc1)NCc1cnc2c(n1)c(=O)[nH]c(n2)N		3.16512
OCC(=O)[C@@]1(O)C[C@H](OC2CC(N)C(C(O2)C)OC2CCCCO2)c2c(C1)c(O)c1c(c2O)C(=O)c2c(C1=O)cccc2OC	pirarubicin	3.16414
CN1CCN(CC1)C(c1ccccc1)c1ccccc1	Cyclizine hydrochloride	3.16278
OC(=O)CC[C@]1(O)CC[C@@H]2[C@]1(C)CC[C@H]1[C@H]2[C@H]2C[C@H]2C2=CC(=O)CC[C@]12C	PRORENOATE POTASSIUM	3.16209
OP1(=O)O[Pt]2([NH2+][C@H]3[C@H]([NH2+]2)CCCC3)OP(=O)(O1)O	PT-112	3.15959
CCCCCCCCCCCCN	dodecylamine, Cellegy	3.15954
CCCC(=O)OCOC(=O)C1=C(C)NC(=C(C1c1cccc(c1Cl)Cl)C(=O)OC)C	Clevidipine	3.15945
NC(=Nc1scc(n1)CSCCNC1=NS(=O)(=O)N=C(N1C)N)N	tuvatidine	3.15773
OC1C[Si](CC1N1CCN(CC1)c1ccccc1)(c1ccc(cc1)F)c1ccc(cc1)F		3.15631
CCOc1ccc(cc1)C(=O)OCCN(CC)CC	PARETHOXYCAINE	3.15175
OC(c1cc(Cl)c(c(c1)C(F)(F)F)N)CNC(C)(C)C	mabuterol	3.15164
CC(=CCOc1cc(ccc1Cl)NC(=S)c1ccccc1)C		3.15124
CNCCCC1c2ccccc2C=Cc2c1cccc2	Protriptyline hydrochloride	3.1505
CC(=O)Nc1ncc(s1)[N+](=O)[O-]	AMINITROZOLE	3.1495
CC[C@H]1[C@@H](COc2nccc3c2cc(OC)c(c3)C(=O)N)NC(=O)[C@H]1F	PF06650833	3.14711
OCC1COC(O1)CI	Domiodol	3.14658
O=C1CCc2c(N1)nccc2Oc1ccc2c(c1)C1C(O2)C1c1nc2c([nH]1)cc(cc2)C(F)(F)F	BGB-283	3.14643
CN1CCN(CC1)C(=O)c1ccc(cc1)CN1CCOCC1		3.14587
O=c1sn(c(=O)n1Cc1ccccc1)c1cccc2c1cccc2	Tideglusib	3.14443
O[C@H]1C[C@H](O)C(=C)/C(=C\C=C\2/CCC[C@]3([C@H]2CC[C@@H]3[C@@H](/C=C/[C@@H](C(C)C)C)C)C)/C1	Doxercalciferol	3.14263
O=C1CN=C(c2c(N1)ccc(c2)Cl)c1ccccc1	Nordiazepam	3.14147
[O-][N+](=O)c1ccc(c2c1cccn2)O	Pharmaprojects No. 3064	3.14107
OC1CCN(CC1F)S(=O)(=O)c1cc(ccc1F)C(=O)Nc1cc(F)c(c(c1)F)F	NVR-1221	3.13915
O=C(C(O)(C)C)Nc1ccc(c(c1)C(F)(F)F)[N+](=O)[O-]	2-Hydroxyflutamide	3.13478
CNC(=N)NCCC[C@@H](C(=O)N[C@H](C(=O)N)Cc1cnc2c1cccc2)NC(=O)[C@@H](NC(=O)NNC(=O)[C@@H](NC(=O)[C@H]([C@H](O)C)NC(=O)[C@@H](NC(=O)[C@@H](Cc1cnc2c1cccc2)NC(=O)[C@@H](Cc1ccc(cc1)O)NC(=O)C)CC(=O)N)Cc1ccccc1)CC(C)C	TAK-683	3.13385
COc1cccc(c1)CCc1ccccc1OCC(OC(=O)CCC(=O)O)CN(C)C	sarpogrelate hydrochloride, KunWha Pharmaceutical	3.13327
NCCCC[C@H](C(=O)O)NC(=O)[C@@H](NC(=O)[C@@H](NC(=O)[C@@H](NC(=O)[C@H](CCS(=O)(=O)C)N)CCC(=O)O)Cc1ncnc1)Cc1ccccc1		3.13303
OC[C@H]1O[C@@H](Oc2c(oc3c(c2=O)c(O)cc(c3)O)c2ccc(c(c2)O)O)[C@@H]([C@H]([C@H]1O)O)O	HYPEROSIDE	3.13136
CCOC(=O)Nc1ccc(cc1)SCC1CO[C@](O1)(Cn1cncc1)c1ccc(cc1Cl)Cl	tubulozole	3.13085
COCCCOc1ccnc(c1C)CS(=O)c1nc2c([nH]1)cccc2	RABEPRAZOLE117976-89-3	3.12877
O=C(Nc1c(C)cccc1Cl)Nc1ccncc1	CI-953	3.12852
COc1cccc(c1)C(=O)N1CCC2(CC1)Cc1ccccc1NC2=O		3.12801
C[C@H](Cc1c[nH]cn1)N	(R)-alpha-Methylhistamine	3.12797
Oc1c(cc(cc1C(C)(C)C)CCCOCc1cccnc1)C(C)(C)C	Nicanartine	3.12403
NCCC[C@@H](C(=O)NCC(=O)N)NC(=O)[C@@H]1CCCN1C(=O)[C@@H]1CSSCCC(=O)N[C@H](Cc2ccc(cc2)OCC)C(=O)N[C@H](C(=O)N[C@H](C(=O)N[C@H](C(=O)N1)CC(=O)N)[C@H](O)C)[C@H](CC)C	antocin II	3.12342
CN1CCN(CC1)C[C@@H]1C(=O)Nc2c(S[C@@H]1c1ccccc1)cccc2	BTM-1042	3.1216
OC(c1ccc(cc1)Cl)(c1ccc(cc1)Cl)C1CC1	PROCLONOL	3.12119
Clc1ccc(c(c1)c1cc(Cl)c(cc1Cl)Cl)Cl	K-101	3.10884
OC[C@@H]([C@@H](c1ccccc1)O)NC(COc1ccccc1)C	SOLPECAINOL	3.10873
Nc1ccn(c(=O)n1)[C@@H]1O[C@@H](C[C@@H]1F)CO	RO 316840	3.10838
O=CN1C(CNc2ccc(cc2)C(=O)N[C@H](C(=O)O)CCC(=O)O)CNc2c1c(=O)nc([nH]2)N	Leucovorin Calcium	3.10576
CC[C@@H]([C@@H](C(=O)N1CCC[C@H]1C(=O)N1CCC[C@H]1C(=O)O)N)C	IPP	3.10389
OC(=O)CCC(=O)c1ccc2c(c1)c1ccccc1o2	furobufen	3.10169
OCCN[C@H]1CCc2c1cccc2c1noc(n1)c1ccc(c(c1)C#N)OC(C)C	Ozanimod	3.09872
OC(CN1CCN(CC1)CCCC(c1ccc(cc1)F)c1ccc(cc1)F)CNc1ccccc1	PR 000608	3.09524
C1CCCCN(C1)CCC(c1ccccc1)c1ccccc1	PROZAPINE	3.09213
OC(COc1cccc(c1)C)CNC(C)C	TOLIPROLOL	3.08984
CCO[C@H](C(=O)O)Cc1ccc(cc1)OCCn1c(C)ccc1c1ccc(cc1)SC	Saroglitazar	3.08653
CCCCc1nc(C)c(c(=O)n1Cc1ccc(cc1)c1ccccc1c1nnn[nH]1)CC(=S)N(C)C	fimasartan	3.0825
Fc1ccc2c(c1)nc(s2)COc1ccc2c(c1)[C@H](O)[C@@H](CO2)Cc1cccc(c1)C(=O)O	(+)-CP-85958	3.08021
COCC(Cn1c(=O)cnn(c1=O)c1ccc(c(c1)C(=O)NCC1(O)CCCCCC1)Cl)O	CE-224535	3.07664
ONC(=O)[C@H]1CC2(CC2)CN([C@@H]1C(=O)N1CCN(CC1)c1ccccc1)C(=O)OC	Aderbasib	3.07652
OCC(=O)[C@@]1(O)[C@@H](C)C[C@@H]2[C@]1(C)C[C@H](O)[C@]1([C@H]2CCC2=CC(=O)C=C[C@]12C)F	Betamethasone (Celestone)	3.07572
O=C(N1CCc2c([C@@H]1c1ccccc1)cccc2)O[C@H]1CN2CCC1CC2	solifenacin succinate, ODT	3.07472
NCC1OC(OC2C(N)CC(C(C2O)OC2OCC(C(C2O)NC)(C)O)N)C(C(C1O)O)O	BETAMICIN	3.07202
O=C1C=C[C@]2([C@H](N1)CC[C@@H]1[C@@H]2CC[C@]2([C@H]1CC[C@@H]2C(=O)Nc1cc(ccc1C(F)(F)F)C(F)(F)F)C)C	dutasteride	3.07103
CC(C(Cc1ccc(cc1)Cl)(O)C)CN(C)C	CLOBUTINOL	3.07031
Oc1ccc(cc1)CC1NCCc2c1cc(O)c(c2)O	Norcoclaurine	3.06328
OC(=O)Cc1cc(c(n1C)C(=O)c1ccc(cc1)Cl)C	Zomepirac sodium	3.06044
CC(=C/C(=N/N=c/1\[nH]ncc2c1cccc2)/C)C	BUDRALAZINE	3.05835
O=C1CC[C@@H]2[C@]1(C)CC[C@H]1[C@H]2CCc2c1ccc(c2)OS(=O)(=O)N	CT-2251	3.05775
CC(C[C@@H](C(=O)N[C@H](C(=O)NC(C)(C)C)Cc1ccc(cc1)OCc1ccccc1)N(Cc1ccc(cc1)C(C)(C)C)C)C	PD 173212	3.05596
O=C(N1CCC(CC1)N1CCc2c(NC1=O)cccc2)C[C@@H](C(=O)N1CCC(CC1)N1CCOCC1)Cc1cc(C)c(c(c1)C)O	BI-44370	3.05546
COc1cc(ccc1OC)[C@H]1[C@@H]2C(=O)OC[C@@H]2C(=O)c2c1occ2		3.05536
OC[C@@H](C(=O)N[C@@H](C(=O)N[C@H](C(=O)N[C@H](C(=O)O)CCCNC(=N)N)Cc1ccccc1)Cc1ccccc1)NC(=O)[C@H](Cc1ccccc1)NC(=O)CNC(=O)[C@@H]1C[C@H](CN1C(=O)[C@@H]1CCCN1C(=O)[C@@H](NC(=O)[C@@H](CCCNC(=N)N)N)CCCNC(=N)N)O	NPC-567	3.05513
O=C(c1ccc(cc1)C(=O)O)Nc1ccc2c(c1)C(C)(C)CCC2(C)C		3.05262
OC(=O)c1cc(F)c2c(c1)sc(n2)N1[C@@H]2CC[C@H]1C[C@H](C2)OCc1c(onc1c1ccccc1OC(F)(F)F)C1CC1	LJN-452	3.0526
O=C1CC[C@]2(C(=C1)CC[C@@H]1[C@]2(F)[C@@H](O)C[C@]2([C@H]1CC[C@]2(O)C(=O)C)C)C		3.0518
CCOc1ccccc1OCCN[C@@H](Cc1cc2ccn(c2c(c1)C(=O)N)CCCOC(=O)C(C)(C)C)C	KRG-3332	3.05019
CC(=O)CCN1CCC2=C(c3c(C2C1)cccc3)C	YG-19-256	3.04861
CCN1CCC[C@H]1CNC(=O)c1c(OC)ccc(c1OC)Br	Remoxipride	3.04573
CCCCOP(=O)(OC[C@H]1O[C@H](C[C@@H]1OP(=O)(OCCCC)O)n1cc(C)c(=O)[nH]c1=O)O	bisphosphocins, Lakewood-Amedex	3.04501
COC(=O)Nc1[nH]c2c(n1)cc(cc2)Sc1ccccc1	FENBENDAZOLE	3.04271
CN1C=CCC(=C1)C(=O)O[C@@H]1CC[C@@H]2[C@@]1(C)CC[C@H]1[C@H]2CCc2c1ccc(c2)O	IDR-90104	3.03743
O[C@H]1CCC(=C)/C(=C\C=C\2/CCC[C@]3([C@H]2CC[C@@H]3[C@@H](CCCC(O)(C)C)C)C)/C1	Calcifediol	3.03626
O=C1CC[C@@H](C(=O)N1)N1Cc2c(C1=O)cccc2OCc1ccc(cc1)CN1CCOCC1	Iberdomide	3.03291
CC(Cc1ccccc1)NCc1ccccc1Cl	CLOBENZOREX	3.03247
CN1CCC(CC1)NC(=O)c1cccn2c1ncc2		3.02794
COC(=O)[C@@H](NP(=O)(Oc1ccccc1)OCC1C=C[C@@H](O1)n1cnc2c1ncnc2N)C	CF-1001	3.02693
COC(=O)c1c(Cl)cccc1c1ccc(c(c1)F)[C@H](NC(=O)C1(CC1)NC(=O)C(F)(F)F)C	MK-0686	3.02517
COC(=O)C1=C(C)NC(=C(C1c1cccc(c1)[N+](=O)[O-])C(=O)OC/C=C/c1ccccc1)C	Pranidipine	3.02466
CCN(C(=O)c1ccc(c(c1)OC)O)CC	ETAMIVAN	3.02038
Oc1c(N2CCCC2)c(=O)n(c2c1cccn2)c1ccccc1	PIRODOMAST	3.01874
OC[C@H](Cn1ccc(n1)NC(=O)[C@@H](N1CC(=CC1=O)Oc1ccccc1Cl)CC(C)C)O	RO-5305552	3.01788
COc1ccc(cc1)C[C@H](NCC(c1cc(O)cc(c1)O)O)C	(R,R)-4-Methoxyfenoterol	3.01596
O=C1C(c2ccc(cc2)Br)C(=O)c2c1cccc2	BROMIDIONE	3.01556
CCN(CCOc1ccc(cc1)c1sc2c(n1)cc(cc2)Cl)CC	HALETHAZOLE	3.01469
CCCCCOc1ccc(cc1)c1onc(c1)c1ccc(cc1)C(=O)N[C@H]1C[C@@H](O)[C@@H](O)NC(=O)[C@@H]2[C@@H](O)[C@H](CN2C(=O)[C@@H](NC(=O)[C@@H](NC(=O)[C@H]2N(C(=O)C(NC1=O)[C@H](O)C)C[C@@H](C2)O)[C@@H]([C@H](c1ccc(c(c1)OS(=O)(=O)O)O)O)O)[C@@H](CC(=O)N)O)C	Micafungin	3.01422
OC(=O)CCC(=O)N1Cc2ccccc2OC2(C1)CCN(CC2)C(=O)C		3.01334
C=CCN(C(=O)OCc1ccc(cc1)[N+](=O)[O-])C1CCN(CC1)C[C@H]1CN(C[C@]1(O)c1ccccc1)C(=O)C1CCCC1	NIFEVIROC	3.01051
O=C1C=C[C@]2(C(=C1)CC[C@@H]1[C@@H]2[C@@H](O)C[C@]2([C@H]1CC[C@]2(O)C(=O)COP(=O)([O-])[O-])C)C	prednisolone sodium phosphate	3.00997
Fc1ccc(cc1)C(=O)CCCN1CCN2C(C1)Cc1c(C2)[nH]c2c1cccc2	Biriperone	3.0088
CN1CCN(CC1)C1Cc2ccccc2Sc2c1cc(Cl)cc2	(??)-Octoclothepin maleate	3.00449
NCCCNc1ccc2c3c1c(=O)c1c(c3nn2CCNCCO)c(O)ccc1O	Piroxantrone	3.00242
Cc1ccc(cc1)C(=O)N1CCCC1C(=O)N1CCC(CC1)N1CCCC1=O		3.00152
OC(=O)/C=C/c1ccc(cc1)c1[nH]c2c(n1)n(CC1CCCCC1)c(=O)n(c2=O)CC1CCCCC1		3.00083
COC(=O)C1=C(C)NC(=C(C1c1cccc(c1)[N+](=O)[O-])C(=O)OCCN1CCN(CC1)C)C		2.99817
FC(Oc1ccc(cc1)c1ccc2n(c1)c(nn2)C(F)(F)F)(F)F	GS967	2.99683
O=C1C[C@@H]2OCC=C3[C@H]4[C@@H]2[C@@H]2N1c1ccccc1[C@]12CCN([C@H]1C4)C3	STRYCHNINE	2.99646
CCN(CCOc1ccc(cc1)[C@H]1C[C@]2(C)[C@@H](O)CC[C@H]2[C@H]2[C@H]1c1ccc(c(c1CC2)Cl)O)CC	HMR-3339A	2.99624
COc1cccc(c1OC)[C@H]1O[C@H](CC(=O)N2CCC(CC2)CC(=O)O)C(=O)N(c2c1cc(Cl)cc2)CC(COC(=O)C)(C)C	Lapaquistat acetate	2.99502
N[C@@H]1CC[C@H](CC1)Nc1nc(NCc2cccc(c2)I)c2c(n1)n(cn2)C1CCCC1	MDL-106327DA	2.99471
CC(c1c(O)ccc2c1CC[C@@H]1[C@]2(C)CCCC1(C)C)C	TOTAROL	2.99377
O=C(C(=O)c1c(cc2n1cccc2)c1ccccc1)Nc1ccc(cc1)N1CCCCC1		2.9914
CC(Cc1ccc(cc1)C(C(=O)OCCN1CCN(CC1)c1cccc(c1)Cl)C)C	Lobuprofen hydrochloride	2.99048
CCOC(=O)NNc1nncc2c1cccc2	TODRALAZINE	2.98767
CC(OCOCCCOn1cnc2c1nc(N)nc2)C	BRL 55792	2.98645
ONC(=O)CCCCCCNC(=O)c1cnc(nc1)N(c1ccccc1Cl)c1ccccc1	Citarinostat	2.98434
CCOc1cc2c(cc1OCC)nc(nc2N1CCC(CC1)n1c(=O)c2cc(C)ccc2n(c1=O)C)N1CCOCC1	KF 24345	2.98301
COc1ccc(cc1)n1[nH]c2c(c1=O)cnc1c2CCCCC1		2.983
O[C@@H]1CC[C@H](CC1)Nc1nc(nc2c1cc[nH]2)c1ccccc1	Derenofylline	2.983
C[C@@]1(CSC(=N1)c1cccc(c1O)OCCOCCOCCOC)C(=O)O	FBS-0701	2.98237
O[C@@H]1CC[C@]2([C@@H](C1)CCC1C2C(=O)C[C@]2(C1CCC2C(=O)C)C)C	alfaxalone, Pharmos	2.98199
Brc1cc2c(s1)n1cnnc1CN=C2c1ccccc1Cl		2.98129
O=C1NC(=O)C(O1)(C)C	5,5-Dimethyloxazolidine-2,4-dione	2.98089
OC(=O)C1(CCCC1)c1ccc2c(c1)OC[C@H]([C@@H]2O)Cc1ccc(cc1)c1ccccc1	CP-105696	2.97995
CC(Cn1cnc2c1c(=O)n(C)c(=O)n2C)C	Isbufylline	2.97452
c1ccc(cc1)C1=CCN(CC1)CC1CCC=C(C1)c1ccccc1	CI 1007	2.97294
CCCn1c2nc([nH]c2c(=O)n(c1=O)CCC)C1CCCC1	CPX	2.97198
CCC(=O)OC(c1ccccc1)(C1CCN(C1)C)CC		2.96914
O[C@H]1CNC(=N[C@@H]1C(=O)O)C	Hydroxyectoine	2.96783
CCN(CCCNC(=O)Cn1ncc(c1c1ccccc1)c1ccccc1)CC	Ipazilide fumarate	2.96762
COc1ccc2c(c1)[nH]c1c2CCN2[C@@H]1C[C@H]1[C@@H](C2)C[C@H]([C@@H]([C@H]1C(=O)OC)OC)OC(=O)/C=C/c1cc(OC)c(c(c1)OC)OC	RESCINNAMINE	2.96726
CO[C@@H]([C@H](Cc1ccccc1)NC(=O)OC(C)(C)C)CN(S(=O)(=O)c1ccc2c(c1)cco2)CC(C)C	SPI-452	2.96519
O=C1CCC(=NN1)c1ccc(cc1)n1cncc1	Imazodan	2.96506
O=C(N1CCC(CC1)N1Cc2c(C1=O)cccc2)C1CCN(CC1)C(=O)c1ccccc1		2.96441
Nc1nc2c(n1Cc1ccc(cc1)C(F)(F)F)cccc2		2.96441
CCOC(=O)C1CCN(CC1)c1nc(ccc1[N+](=O)[O-])N(S(=O)(=O)c1ccc(cc1)C)C		2.96406
FCC1COc2c3n1cc(C(=O)O)c(=O)c3cc(c2N1CCN(CC1)c1ccccn1)F	R 71762	2.96263
Oc1cccc(c1)CN1CCCCC21Cc1ccccc1CNC2=O		2.96106
COc1ccc2c3c1O[C@@H]1[C@@]3(CCN(C2)C)C=C[C@@H](C1)OC(=O)c1ccccc1	Memogain	2.96077
OC(=O)[C@@H]1N2C(=O)[C@H]([C@H]2SC1(C)C)NC(=O)C1(N)CCCCC1	ciclacillin	2.95992
C=C1C[C@@H]([C@@H](C1)C(=O)O)N	Icofungipen	2.95935
O=C(N1CCCC1C(=O)N1CCC(CC1)c1ccccc1)c1ccccc1		2.95935
O=C1NC(=O)[C@]2(C1)C(=O)N(Cc1ccc(cc1F)Br)C(=O)c1n2ccc1	ranirestat	2.95908
CCOP(=O)(C(c1cc(C)c(c(c1)OC)O)CNc1ccc(nc1C)C)OCC	QRX-401	2.95581
[truncated: 12,172 more rows]
