# Supplementary material for: Pharmacological inhibition of CLK2 activates YAP by promoting alternative splicing of AMOTL2
Source: eLife. 2023 Dec 21;12:RP88508. doi: 10.7554/eLife.88508 (PMC10735217; doi:10.7554/eLife.88508)
Supplement: Figure 1—source data 2. [file elife-88508-fig1-data2.xlsx]

## Sheet: Figure 2D
Compound SMILES	Compound Name	[Compound] (µM)	% Activity	Averaged
CC(CC(=O)Nc1cncc(c1)c1ccc2c(c1)c(n[nH]2)c1nc2c([nH]1)cncc2c1cccc(c1)F)C	SM04646	0.002537	-0.261518	-1.40945
CC(CC(=O)Nc1cncc(c1)c1ccc2c(c1)c(n[nH]2)c1nc2c([nH]1)cncc2c1cccc(c1)F)C	SM04646	0.002537	-1.95302
CC(CC(=O)Nc1cncc(c1)c1ccc2c(c1)c(n[nH]2)c1nc2c([nH]1)cncc2c1cccc(c1)F)C	SM04646	0.002537	-2.01381
CC(CC(=O)Nc1cncc(c1)c1ccc2c(c1)c(n[nH]2)c1nc2c([nH]1)cncc2c1cccc(c1)F)C	SM04646	0.008278	-7.06354	-1.27524
CC(CC(=O)Nc1cncc(c1)c1ccc2c(c1)c(n[nH]2)c1nc2c([nH]1)cncc2c1cccc(c1)F)C	SM04646	0.008278	6.3944
CC(CC(=O)Nc1cncc(c1)c1ccc2c(c1)c(n[nH]2)c1nc2c([nH]1)cncc2c1cccc(c1)F)C	SM04646	0.008278	-3.15659
CC(CC(=O)Nc1cncc(c1)c1ccc2c(c1)c(n[nH]2)c1nc2c([nH]1)cncc2c1cccc(c1)F)C	SM04646	0.02483	-3.96832	-3.30672
CC(CC(=O)Nc1cncc(c1)c1ccc2c(c1)c(n[nH]2)c1nc2c([nH]1)cncc2c1cccc(c1)F)C	SM04646	0.02483	-3.22174
CC(CC(=O)Nc1cncc(c1)c1ccc2c(c1)c(n[nH]2)c1nc2c([nH]1)cncc2c1cccc(c1)F)C	SM04646	0.02483	-2.73008
CC(CC(=O)Nc1cncc(c1)c1ccc2c(c1)c(n[nH]2)c1nc2c([nH]1)cncc2c1cccc(c1)F)C	SM04646	0.08278	-9.80293	-7.04522
CC(CC(=O)Nc1cncc(c1)c1ccc2c(c1)c(n[nH]2)c1nc2c([nH]1)cncc2c1cccc(c1)F)C	SM04646	0.08278	-7.13002
CC(CC(=O)Nc1cncc(c1)c1ccc2c(c1)c(n[nH]2)c1nc2c([nH]1)cncc2c1cccc(c1)F)C	SM04646	0.08278	-4.20272
CC(CC(=O)Nc1cncc(c1)c1ccc2c(c1)c(n[nH]2)c1nc2c([nH]1)cncc2c1cccc(c1)F)C	SM04646	0.2199	-4.16718	-4.09172
CC(CC(=O)Nc1cncc(c1)c1ccc2c(c1)c(n[nH]2)c1nc2c([nH]1)cncc2c1cccc(c1)F)C	SM04646	0.2199	-3.56592
CC(CC(=O)Nc1cncc(c1)c1ccc2c(c1)c(n[nH]2)c1nc2c([nH]1)cncc2c1cccc(c1)F)C	SM04646	0.2199	-4.54205
CC(CC(=O)Nc1cncc(c1)c1ccc2c(c1)c(n[nH]2)c1nc2c([nH]1)cncc2c1cccc(c1)F)C	SM04646	0.6598	-2.02684	-0.82624
CC(CC(=O)Nc1cncc(c1)c1ccc2c(c1)c(n[nH]2)c1nc2c([nH]1)cncc2c1cccc(c1)F)C	SM04646	0.6598	-2.16003
CC(CC(=O)Nc1cncc(c1)c1ccc2c(c1)c(n[nH]2)c1nc2c([nH]1)cncc2c1cccc(c1)F)C	SM04646	0.6598	1.70815
CC(CC(=O)Nc1cncc(c1)c1ccc2c(c1)c(n[nH]2)c1nc2c([nH]1)cncc2c1cccc(c1)F)C	SM04646	2.199	20.2599	25.8801
CC(CC(=O)Nc1cncc(c1)c1ccc2c(c1)c(n[nH]2)c1nc2c([nH]1)cncc2c1cccc(c1)F)C	SM04646	2.199	35.7381
CC(CC(=O)Nc1cncc(c1)c1ccc2c(c1)c(n[nH]2)c1nc2c([nH]1)cncc2c1cccc(c1)F)C	SM04646	2.199	21.6423
CC(CC(=O)Nc1cncc(c1)c1ccc2c(c1)c(n[nH]2)c1nc2c([nH]1)cncc2c1cccc(c1)F)C	SM04646	4.975	53.9352	46.115
CC(CC(=O)Nc1cncc(c1)c1ccc2c(c1)c(n[nH]2)c1nc2c([nH]1)cncc2c1cccc(c1)F)C	SM04646	4.975	32.9866
CC(CC(=O)Nc1cncc(c1)c1ccc2c(c1)c(n[nH]2)c1nc2c([nH]1)cncc2c1cccc(c1)F)C	SM04646	4.975	51.423
CC(CC(=O)Nc1cncc(c1)c1ccc2c(c1)c(n[nH]2)c1nc2c([nH]1)cncc2c1cccc(c1)F)C	SM04646	19.9	31.568	41.2953
CC(CC(=O)Nc1cncc(c1)c1ccc2c(c1)c(n[nH]2)c1nc2c([nH]1)cncc2c1cccc(c1)F)C	SM04646	19.9	48.2681
CC(CC(=O)Nc1cncc(c1)c1ccc2c(c1)c(n[nH]2)c1nc2c([nH]1)cncc2c1cccc(c1)F)C	SM04646	19.9	44.0499
COc1ccc(cn1)NC(=O)c1nnc2c1cc(cc2)c1cncc(c1)CN1CCC(C1)(F)F	SM-04690	0.002537	-9.81527	-5.19661
COc1ccc(cn1)NC(=O)c1nnc2c1cc(cc2)c1cncc(c1)CN1CCC(C1)(F)F	SM-04690	0.002537	2.51845
COc1ccc(cn1)NC(=O)c1nnc2c1cc(cc2)c1cncc(c1)CN1CCC(C1)(F)F	SM-04690	0.002537	-8.293
COc1ccc(cn1)NC(=O)c1nnc2c1cc(cc2)c1cncc(c1)CN1CCC(C1)(F)F	SM-04690	0.008278	-9.35084	-7.49809
COc1ccc(cn1)NC(=O)c1nnc2c1cc(cc2)c1cncc(c1)CN1CCC(C1)(F)F	SM-04690	0.008278	-3.95913
COc1ccc(cn1)NC(=O)c1nnc2c1cc(cc2)c1cncc(c1)CN1CCC(C1)(F)F	SM-04690	0.008278	-9.18431
COc1ccc(cn1)NC(=O)c1nnc2c1cc(cc2)c1cncc(c1)CN1CCC(C1)(F)F	SM-04690	0.02483	-9.23872	-6.66653
COc1ccc(cn1)NC(=O)c1nnc2c1cc(cc2)c1cncc(c1)CN1CCC(C1)(F)F	SM-04690	0.02483	-1.49226
COc1ccc(cn1)NC(=O)c1nnc2c1cc(cc2)c1cncc(c1)CN1CCC(C1)(F)F	SM-04690	0.02483	-9.26861
COc1ccc(cn1)NC(=O)c1nnc2c1cc(cc2)c1cncc(c1)CN1CCC(C1)(F)F	SM-04690	0.08278	3.71516	-1.59931
COc1ccc(cn1)NC(=O)c1nnc2c1cc(cc2)c1cncc(c1)CN1CCC(C1)(F)F	SM-04690	0.08278	1.45317
COc1ccc(cn1)NC(=O)c1nnc2c1cc(cc2)c1cncc(c1)CN1CCC(C1)(F)F	SM-04690	0.08278	-9.96627
COc1ccc(cn1)NC(=O)c1nnc2c1cc(cc2)c1cncc(c1)CN1CCC(C1)(F)F	SM-04690	0.2199	-1.01289	-0.563869
COc1ccc(cn1)NC(=O)c1nnc2c1cc(cc2)c1cncc(c1)CN1CCC(C1)(F)F	SM-04690	0.2199	3.12159
COc1ccc(cn1)NC(=O)c1nnc2c1cc(cc2)c1cncc(c1)CN1CCC(C1)(F)F	SM-04690	0.2199	-3.80031
COc1ccc(cn1)NC(=O)c1nnc2c1cc(cc2)c1cncc(c1)CN1CCC(C1)(F)F	SM-04690	0.6598	-0.954971	0.900898
COc1ccc(cn1)NC(=O)c1nnc2c1cc(cc2)c1cncc(c1)CN1CCC(C1)(F)F	SM-04690	0.6598	1.73975
COc1ccc(cn1)NC(=O)c1nnc2c1cc(cc2)c1cncc(c1)CN1CCC(C1)(F)F	SM-04690	0.6598	1.91792
COc1ccc(cn1)NC(=O)c1nnc2c1cc(cc2)c1cncc(c1)CN1CCC(C1)(F)F	SM-04690	2.199	30.9855	18.7654
COc1ccc(cn1)NC(=O)c1nnc2c1cc(cc2)c1cncc(c1)CN1CCC(C1)(F)F	SM-04690	2.199	5.82796
COc1ccc(cn1)NC(=O)c1nnc2c1cc(cc2)c1cncc(c1)CN1CCC(C1)(F)F	SM-04690	2.199	19.4828
COc1ccc(cn1)NC(=O)c1nnc2c1cc(cc2)c1cncc(c1)CN1CCC(C1)(F)F	SM-04690	4.975	12.9461	28.1251
COc1ccc(cn1)NC(=O)c1nnc2c1cc(cc2)c1cncc(c1)CN1CCC(C1)(F)F	SM-04690	4.975	21.1013
COc1ccc(cn1)NC(=O)c1nnc2c1cc(cc2)c1cncc(c1)CN1CCC(C1)(F)F	SM-04690	4.975	50.3279
COc1ccc(cn1)NC(=O)c1nnc2c1cc(cc2)c1cncc(c1)CN1CCC(C1)(F)F	SM-04690	19.9	31.6556	49.6117
COc1ccc(cn1)NC(=O)c1nnc2c1cc(cc2)c1cncc(c1)CN1CCC(C1)(F)F	SM-04690	19.9	52.6766
COc1ccc(cn1)NC(=O)c1nnc2c1cc(cc2)c1cncc(c1)CN1CCC(C1)(F)F	SM-04690	19.9	64.5029
O=C(Cc1ccc(cn1)c1ccc(cc1)N1CCOCC1)NCc1cccc(c1)F	KX-02	0.002537	-10.463	-7.23397
O=C(Cc1ccc(cn1)c1ccc(cc1)N1CCOCC1)NCc1cccc(c1)F	KX-02	0.002537	-4.68497
O=C(Cc1ccc(cn1)c1ccc(cc1)N1CCOCC1)NCc1cccc(c1)F	KX-02	0.002537	-6.55395
O=C(Cc1ccc(cn1)c1ccc(cc1)N1CCOCC1)NCc1cccc(c1)F	KX-02	0.008278	5.96119	-0.94997
O=C(Cc1ccc(cn1)c1ccc(cc1)N1CCOCC1)NCc1cccc(c1)F	KX-02	0.008278	-8.24812
O=C(Cc1ccc(cn1)c1ccc(cc1)N1CCOCC1)NCc1cccc(c1)F	KX-02	0.008278	-0.562983
O=C(Cc1ccc(cn1)c1ccc(cc1)N1CCOCC1)NCc1cccc(c1)F	KX-02	0.02483	3.08798	-0.918199
O=C(Cc1ccc(cn1)c1ccc(cc1)N1CCOCC1)NCc1cccc(c1)F	KX-02	0.02483	-4.66662
O=C(Cc1ccc(cn1)c1ccc(cc1)N1CCOCC1)NCc1cccc(c1)F	KX-02	0.02483	-1.17596
O=C(Cc1ccc(cn1)c1ccc(cc1)N1CCOCC1)NCc1cccc(c1)F	KX-02	0.08278	-3.3187	-3.65458
O=C(Cc1ccc(cn1)c1ccc(cc1)N1CCOCC1)NCc1cccc(c1)F	KX-02	0.08278	-8.82987
O=C(Cc1ccc(cn1)c1ccc(cc1)N1CCOCC1)NCc1cccc(c1)F	KX-02	0.08278	1.18485
O=C(Cc1ccc(cn1)c1ccc(cc1)N1CCOCC1)NCc1cccc(c1)F	KX-02	0.2199	3.00596	0.950841
O=C(Cc1ccc(cn1)c1ccc(cc1)N1CCOCC1)NCc1cccc(c1)F	KX-02	0.2199	0.0298919
O=C(Cc1ccc(cn1)c1ccc(cc1)N1CCOCC1)NCc1cccc(c1)F	KX-02	0.2199	-0.183334
O=C(Cc1ccc(cn1)c1ccc(cc1)N1CCOCC1)NCc1cccc(c1)F	KX-02	0.6598	1.07081	-1.83326
O=C(Cc1ccc(cn1)c1ccc(cc1)N1CCOCC1)NCc1cccc(c1)F	KX-02	0.6598	-2.07775
O=C(Cc1ccc(cn1)c1ccc(cc1)N1CCOCC1)NCc1cccc(c1)F	KX-02	0.6598	-4.49286
O=C(Cc1ccc(cn1)c1ccc(cc1)N1CCOCC1)NCc1cccc(c1)F	KX-02	2.199	3.44721	3.11377
O=C(Cc1ccc(cn1)c1ccc(cc1)N1CCOCC1)NCc1cccc(c1)F	KX-02	2.199	7.39846
O=C(Cc1ccc(cn1)c1ccc(cc1)N1CCOCC1)NCc1cccc(c1)F	KX-02	2.199	-1.50434
O=C(Cc1ccc(cn1)c1ccc(cc1)N1CCOCC1)NCc1cccc(c1)F	KX-02	4.975	30.5794	21.6621
O=C(Cc1ccc(cn1)c1ccc(cc1)N1CCOCC1)NCc1cccc(c1)F	KX-02	4.975	16.0323
O=C(Cc1ccc(cn1)c1ccc(cc1)N1CCOCC1)NCc1cccc(c1)F	KX-02	4.975	18.3746
O=C(Cc1ccc(cn1)c1ccc(cc1)N1CCOCC1)NCc1cccc(c1)F	KX-02	19.9	39.6217	30.8488
O=C(Cc1ccc(cn1)c1ccc(cc1)N1CCOCC1)NCc1cccc(c1)F	KX-02	19.9	37.8274
O=C(Cc1ccc(cn1)c1ccc(cc1)N1CCOCC1)NCc1cccc(c1)F	KX-02	19.9	15.0972
NC(=O)c1cnc2c(c1N[C@@H]1[C@H]3CC4C[C@@H]1C[C@@](C3)(C4)O)cc[nH]2	peficitinib	0.002537	16.4474	9.22481
NC(=O)c1cnc2c(c1N[C@@H]1[C@H]3CC4C[C@@H]1C[C@@](C3)(C4)O)cc[nH]2	peficitinib	0.002537	3.39854
NC(=O)c1cnc2c(c1N[C@@H]1[C@H]3CC4C[C@@H]1C[C@@](C3)(C4)O)cc[nH]2	peficitinib	0.002537	7.82853
NC(=O)c1cnc2c(c1N[C@@H]1[C@H]3CC4C[C@@H]1C[C@@](C3)(C4)O)cc[nH]2	peficitinib	0.008278	-6.82526	4.48362
NC(=O)c1cnc2c(c1N[C@@H]1[C@H]3CC4C[C@@H]1C[C@@](C3)(C4)O)cc[nH]2	peficitinib	0.008278	11.6229
NC(=O)c1cnc2c(c1N[C@@H]1[C@H]3CC4C[C@@H]1C[C@@](C3)(C4)O)cc[nH]2	peficitinib	0.008278	8.65319
NC(=O)c1cnc2c(c1N[C@@H]1[C@H]3CC4C[C@@H]1C[C@@](C3)(C4)O)cc[nH]2	peficitinib	0.02483	0.681911	8.82922
NC(=O)c1cnc2c(c1N[C@@H]1[C@H]3CC4C[C@@H]1C[C@@](C3)(C4)O)cc[nH]2	peficitinib	0.02483	2.60116
NC(=O)c1cnc2c(c1N[C@@H]1[C@H]3CC4C[C@@H]1C[C@@](C3)(C4)O)cc[nH]2	peficitinib	0.02483	23.2046
NC(=O)c1cnc2c(c1N[C@@H]1[C@H]3CC4C[C@@H]1C[C@@](C3)(C4)O)cc[nH]2	peficitinib	0.08278	5.33779	8.77412
NC(=O)c1cnc2c(c1N[C@@H]1[C@H]3CC4C[C@@H]1C[C@@](C3)(C4)O)cc[nH]2	peficitinib	0.08278	7.18044
NC(=O)c1cnc2c(c1N[C@@H]1[C@H]3CC4C[C@@H]1C[C@@](C3)(C4)O)cc[nH]2	peficitinib	0.08278	13.8041
NC(=O)c1cnc2c(c1N[C@@H]1[C@H]3CC4C[C@@H]1C[C@@](C3)(C4)O)cc[nH]2	peficitinib	0.2199	21.3242	19.3922
NC(=O)c1cnc2c(c1N[C@@H]1[C@H]3CC4C[C@@H]1C[C@@](C3)(C4)O)cc[nH]2	peficitinib	0.2199	20.9163
NC(=O)c1cnc2c(c1N[C@@H]1[C@H]3CC4C[C@@H]1C[C@@](C3)(C4)O)cc[nH]2	peficitinib	0.2199	15.9361
NC(=O)c1cnc2c(c1N[C@@H]1[C@H]3CC4C[C@@H]1C[C@@](C3)(C4)O)cc[nH]2	peficitinib	0.6598	20.4218	32.0426
NC(=O)c1cnc2c(c1N[C@@H]1[C@H]3CC4C[C@@H]1C[C@@](C3)(C4)O)cc[nH]2	peficitinib	0.6598	42.5401
NC(=O)c1cnc2c(c1N[C@@H]1[C@H]3CC4C[C@@H]1C[C@@](C3)(C4)O)cc[nH]2	peficitinib	0.6598	33.1659
NC(=O)c1cnc2c(c1N[C@@H]1[C@H]3CC4C[C@@H]1C[C@@](C3)(C4)O)cc[nH]2	peficitinib	2.199	39.2021	32.8901
NC(=O)c1cnc2c(c1N[C@@H]1[C@H]3CC4C[C@@H]1C[C@@](C3)(C4)O)cc[nH]2	peficitinib	2.199	34.5884
NC(=O)c1cnc2c(c1N[C@@H]1[C@H]3CC4C[C@@H]1C[C@@](C3)(C4)O)cc[nH]2	peficitinib	2.199	24.8799
NC(=O)c1cnc2c(c1N[C@@H]1[C@H]3CC4C[C@@H]1C[C@@](C3)(C4)O)cc[nH]2	peficitinib	4.975	116.393	102.923
NC(=O)c1cnc2c(c1N[C@@H]1[C@H]3CC4C[C@@H]1C[C@@](C3)(C4)O)cc[nH]2	peficitinib	4.975	73.9589
NC(=O)c1cnc2c(c1N[C@@H]1[C@H]3CC4C[C@@H]1C[C@@](C3)(C4)O)cc[nH]2	peficitinib	4.975	118.417
NC(=O)c1cnc2c(c1N[C@@H]1[C@H]3CC4C[C@@H]1C[C@@](C3)(C4)O)cc[nH]2	peficitinib	19.9	80.3896	102.445
NC(=O)c1cnc2c(c1N[C@@H]1[C@H]3CC4C[C@@H]1C[C@@](C3)(C4)O)cc[nH]2	peficitinib	19.9	104.679
NC(=O)c1cnc2c(c1N[C@@H]1[C@H]3CC4C[C@@H]1C[C@@](C3)(C4)O)cc[nH]2	peficitinib	19.9	122.265
CCN1CCC(CC1)Nc1ccc2c(c1)/C(=C(\c1[nH]cc(n1)C)/c1cccc(c1)F)/C(=O)N2	XL-999	0.002537	-10.0395	-2.83578
CCN1CCC(CC1)Nc1ccc2c(c1)/C(=C(\c1[nH]cc(n1)C)/c1cccc(c1)F)/C(=O)N2	XL-999	0.002537	-4.09066
CCN1CCC(CC1)Nc1ccc2c(c1)/C(=C(\c1[nH]cc(n1)C)/c1cccc(c1)F)/C(=O)N2	XL-999	0.002537	5.62276
CCN1CCC(CC1)Nc1ccc2c(c1)/C(=C(\c1[nH]cc(n1)C)/c1cccc(c1)F)/C(=O)N2	XL-999	0.008278	-5.29167	1.18926
CCN1CCC(CC1)Nc1ccc2c(c1)/C(=C(\c1[nH]cc(n1)C)/c1cccc(c1)F)/C(=O)N2	XL-999	0.008278	2.81885
CCN1CCC(CC1)Nc1ccc2c(c1)/C(=C(\c1[nH]cc(n1)C)/c1cccc(c1)F)/C(=O)N2	XL-999	0.008278	6.0406
CCN1CCC(CC1)Nc1ccc2c(c1)/C(=C(\c1[nH]cc(n1)C)/c1cccc(c1)F)/C(=O)N2	XL-999	0.02483	-4.99521	-4.08032
CCN1CCC(CC1)Nc1ccc2c(c1)/C(=C(\c1[nH]cc(n1)C)/c1cccc(c1)F)/C(=O)N2	XL-999	0.02483	-1.59247
CCN1CCC(CC1)Nc1ccc2c(c1)/C(=C(\c1[nH]cc(n1)C)/c1cccc(c1)F)/C(=O)N2	XL-999	0.02483	-5.65329
CCN1CCC(CC1)Nc1ccc2c(c1)/C(=C(\c1[nH]cc(n1)C)/c1cccc(c1)F)/C(=O)N2	XL-999	0.08278	4.01306	2.45388
CCN1CCC(CC1)Nc1ccc2c(c1)/C(=C(\c1[nH]cc(n1)C)/c1cccc(c1)F)/C(=O)N2	XL-999	0.08278	2.13625
CCN1CCC(CC1)Nc1ccc2c(c1)/C(=C(\c1[nH]cc(n1)C)/c1cccc(c1)F)/C(=O)N2	XL-999	0.08278	1.21234
CCN1CCC(CC1)Nc1ccc2c(c1)/C(=C(\c1[nH]cc(n1)C)/c1cccc(c1)F)/C(=O)N2	XL-999	0.2199	-1.55476	8.09404
CCN1CCC(CC1)Nc1ccc2c(c1)/C(=C(\c1[nH]cc(n1)C)/c1cccc(c1)F)/C(=O)N2	XL-999	0.2199	19.4257
CCN1CCC(CC1)Nc1ccc2c(c1)/C(=C(\c1[nH]cc(n1)C)/c1cccc(c1)F)/C(=O)N2	XL-999	0.2199	6.41115
CCN1CCC(CC1)Nc1ccc2c(c1)/C(=C(\c1[nH]cc(n1)C)/c1cccc(c1)F)/C(=O)N2	XL-999	0.6598	19.2246	14.4533
CCN1CCC(CC1)Nc1ccc2c(c1)/C(=C(\c1[nH]cc(n1)C)/c1cccc(c1)F)/C(=O)N2	XL-999	0.6598	19.7149
CCN1CCC(CC1)Nc1ccc2c(c1)/C(=C(\c1[nH]cc(n1)C)/c1cccc(c1)F)/C(=O)N2	XL-999	0.6598	4.42026
CCN1CCC(CC1)Nc1ccc2c(c1)/C(=C(\c1[nH]cc(n1)C)/c1cccc(c1)F)/C(=O)N2	XL-999	2.199	51.6279	43.1013
CCN1CCC(CC1)Nc1ccc2c(c1)/C(=C(\c1[nH]cc(n1)C)/c1cccc(c1)F)/C(=O)N2	XL-999	2.199	32.8625
CCN1CCC(CC1)Nc1ccc2c(c1)/C(=C(\c1[nH]cc(n1)C)/c1cccc(c1)F)/C(=O)N2	XL-999	2.199	44.8134
CCN1CCC(CC1)Nc1ccc2c(c1)/C(=C(\c1[nH]cc(n1)C)/c1cccc(c1)F)/C(=O)N2	XL-999	4.975	88.0859	83.0087
CCN1CCC(CC1)Nc1ccc2c(c1)/C(=C(\c1[nH]cc(n1)C)/c1cccc(c1)F)/C(=O)N2	XL-999	4.975	42.2234
CCN1CCC(CC1)Nc1ccc2c(c1)/C(=C(\c1[nH]cc(n1)C)/c1cccc(c1)F)/C(=O)N2	XL-999	4.975	118.717
CCN1CCC(CC1)Nc1ccc2c(c1)/C(=C(\c1[nH]cc(n1)C)/c1cccc(c1)F)/C(=O)N2	XL-999	19.9	97.1839	57.8762
CCN1CCC(CC1)Nc1ccc2c(c1)/C(=C(\c1[nH]cc(n1)C)/c1cccc(c1)F)/C(=O)N2	XL-999	19.9	31.2862
CCN1CCC(CC1)Nc1ccc2c(c1)/C(=C(\c1[nH]cc(n1)C)/c1cccc(c1)F)/C(=O)N2	XL-999	19.9	45.1587
CCS(=O)(=O)N1CCN(CC1)c1ccc(cc1)Nc1ncc(c(n1)NC1CC1)C(=O)N	Cerdulatinib	0.002537	-1.65954	-2.052
CCS(=O)(=O)N1CCN(CC1)c1ccc(cc1)Nc1ncc(c(n1)NC1CC1)C(=O)N	Cerdulatinib	0.002537	-1.22574
CCS(=O)(=O)N1CCN(CC1)c1ccc(cc1)Nc1ncc(c(n1)NC1CC1)C(=O)N	Cerdulatinib	0.002537	-3.27073
CCS(=O)(=O)N1CCN(CC1)c1ccc(cc1)Nc1ncc(c(n1)NC1CC1)C(=O)N	Cerdulatinib	0.008278	2.18864	-0.150306
CCS(=O)(=O)N1CCN(CC1)c1ccc(cc1)Nc1ncc(c(n1)NC1CC1)C(=O)N	Cerdulatinib	0.008278	-3.07351
CCS(=O)(=O)N1CCN(CC1)c1ccc(cc1)Nc1ncc(c(n1)NC1CC1)C(=O)N	Cerdulatinib	0.008278	0.433952
CCS(=O)(=O)N1CCN(CC1)c1ccc(cc1)Nc1ncc(c(n1)NC1CC1)C(=O)N	Cerdulatinib	0.02483	8.75302	2.28108
CCS(=O)(=O)N1CCN(CC1)c1ccc(cc1)Nc1ncc(c(n1)NC1CC1)C(=O)N	Cerdulatinib	0.02483	-1.24351
CCS(=O)(=O)N1CCN(CC1)c1ccc(cc1)Nc1ncc(c(n1)NC1CC1)C(=O)N	Cerdulatinib	0.02483	-0.666272
CCS(=O)(=O)N1CCN(CC1)c1ccc(cc1)Nc1ncc(c(n1)NC1CC1)C(=O)N	Cerdulatinib	0.08278	-6.55124	-3.02695
CCS(=O)(=O)N1CCN(CC1)c1ccc(cc1)Nc1ncc(c(n1)NC1CC1)C(=O)N	Cerdulatinib	0.08278	3.97593
CCS(=O)(=O)N1CCN(CC1)c1ccc(cc1)Nc1ncc(c(n1)NC1CC1)C(=O)N	Cerdulatinib	0.08278	-6.50555
CCS(=O)(=O)N1CCN(CC1)c1ccc(cc1)Nc1ncc(c(n1)NC1CC1)C(=O)N	Cerdulatinib	0.2199	15.691	19.0389
CCS(=O)(=O)N1CCN(CC1)c1ccc(cc1)Nc1ncc(c(n1)NC1CC1)C(=O)N	Cerdulatinib	0.2199	16.2171
CCS(=O)(=O)N1CCN(CC1)c1ccc(cc1)Nc1ncc(c(n1)NC1CC1)C(=O)N	Cerdulatinib	0.2199	25.2085
CCS(=O)(=O)N1CCN(CC1)c1ccc(cc1)Nc1ncc(c(n1)NC1CC1)C(=O)N	Cerdulatinib	0.6598	27.4968	38.1734
CCS(=O)(=O)N1CCN(CC1)c1ccc(cc1)Nc1ncc(c(n1)NC1CC1)C(=O)N	Cerdulatinib	0.6598	22.2455
CCS(=O)(=O)N1CCN(CC1)c1ccc(cc1)Nc1ncc(c(n1)NC1CC1)C(=O)N	Cerdulatinib	0.6598	64.7779
CCS(=O)(=O)N1CCN(CC1)c1ccc(cc1)Nc1ncc(c(n1)NC1CC1)C(=O)N	Cerdulatinib	2.199	105.545	90.3642
CCS(=O)(=O)N1CCN(CC1)c1ccc(cc1)Nc1ncc(c(n1)NC1CC1)C(=O)N	Cerdulatinib	2.199	59.1733
CCS(=O)(=O)N1CCN(CC1)c1ccc(cc1)Nc1ncc(c(n1)NC1CC1)C(=O)N	Cerdulatinib	2.199	106.374
CCS(=O)(=O)N1CCN(CC1)c1ccc(cc1)Nc1ncc(c(n1)NC1CC1)C(=O)N	Cerdulatinib	4.975	64.96	57.5058
CCS(=O)(=O)N1CCN(CC1)c1ccc(cc1)Nc1ncc(c(n1)NC1CC1)C(=O)N	Cerdulatinib	4.975	71.4634
CCS(=O)(=O)N1CCN(CC1)c1ccc(cc1)Nc1ncc(c(n1)NC1CC1)C(=O)N	Cerdulatinib	4.975	36.094
CCS(=O)(=O)N1CCN(CC1)c1ccc(cc1)Nc1ncc(c(n1)NC1CC1)C(=O)N	Cerdulatinib	19.9	13.6984	16.4406
CCS(=O)(=O)N1CCN(CC1)c1ccc(cc1)Nc1ncc(c(n1)NC1CC1)C(=O)N	Cerdulatinib	19.9	9.91702
CCS(=O)(=O)N1CCN(CC1)c1ccc(cc1)Nc1ncc(c(n1)NC1CC1)C(=O)N	Cerdulatinib	19.9	25.7062
CCn1c(nc2c1c(OC[C@H]1CCCNC1)cnc2C#CC(O)(C)C)c1nonc1N	GSK-690693	0.002537	-2.30028	3.54755
CCn1c(nc2c1c(OC[C@H]1CCCNC1)cnc2C#CC(O)(C)C)c1nonc1N	GSK-690693	0.002537	6.14186
CCn1c(nc2c1c(OC[C@H]1CCCNC1)cnc2C#CC(O)(C)C)c1nonc1N	GSK-690693	0.002537	6.80106
CCn1c(nc2c1c(OC[C@H]1CCCNC1)cnc2C#CC(O)(C)C)c1nonc1N	GSK-690693	0.008278	11.3612	7.16268
CCn1c(nc2c1c(OC[C@H]1CCCNC1)cnc2C#CC(O)(C)C)c1nonc1N	GSK-690693	0.008278	2.80268
CCn1c(nc2c1c(OC[C@H]1CCCNC1)cnc2C#CC(O)(C)C)c1nonc1N	GSK-690693	0.008278	7.32415
CCn1c(nc2c1c(OC[C@H]1CCCNC1)cnc2C#CC(O)(C)C)c1nonc1N	GSK-690693	0.02483	-3.08521	-3.34636
CCn1c(nc2c1c(OC[C@H]1CCCNC1)cnc2C#CC(O)(C)C)c1nonc1N	GSK-690693	0.02483	-0.744828
CCn1c(nc2c1c(OC[C@H]1CCCNC1)cnc2C#CC(O)(C)C)c1nonc1N	GSK-690693	0.02483	-6.20904
CCn1c(nc2c1c(OC[C@H]1CCCNC1)cnc2C#CC(O)(C)C)c1nonc1N	GSK-690693	0.08278	-2.24688	-2.74249
CCn1c(nc2c1c(OC[C@H]1CCCNC1)cnc2C#CC(O)(C)C)c1nonc1N	GSK-690693	0.08278	-0.991349
CCn1c(nc2c1c(OC[C@H]1CCCNC1)cnc2C#CC(O)(C)C)c1nonc1N	GSK-690693	0.08278	-4.98925
CCn1c(nc2c1c(OC[C@H]1CCCNC1)cnc2C#CC(O)(C)C)c1nonc1N	GSK-690693	0.2199	7.08146	4.60849
CCn1c(nc2c1c(OC[C@H]1CCCNC1)cnc2C#CC(O)(C)C)c1nonc1N	GSK-690693	0.2199	5.12456
CCn1c(nc2c1c(OC[C@H]1CCCNC1)cnc2C#CC(O)(C)C)c1nonc1N	GSK-690693	0.2199	1.61944
CCn1c(nc2c1c(OC[C@H]1CCCNC1)cnc2C#CC(O)(C)C)c1nonc1N	GSK-690693	0.6598	16.0741	20.2433
CCn1c(nc2c1c(OC[C@H]1CCCNC1)cnc2C#CC(O)(C)C)c1nonc1N	GSK-690693	0.6598	32.7605
CCn1c(nc2c1c(OC[C@H]1CCCNC1)cnc2C#CC(O)(C)C)c1nonc1N	GSK-690693	0.6598	11.8954
CCn1c(nc2c1c(OC[C@H]1CCCNC1)cnc2C#CC(O)(C)C)c1nonc1N	GSK-690693	2.199	98.7094	68.0196
CCn1c(nc2c1c(OC[C@H]1CCCNC1)cnc2C#CC(O)(C)C)c1nonc1N	GSK-690693	2.199	52.3973
CCn1c(nc2c1c(OC[C@H]1CCCNC1)cnc2C#CC(O)(C)C)c1nonc1N	GSK-690693	2.199	52.952
CCn1c(nc2c1c(OC[C@H]1CCCNC1)cnc2C#CC(O)(C)C)c1nonc1N	GSK-690693	4.975	127.267	126.999
CCn1c(nc2c1c(OC[C@H]1CCCNC1)cnc2C#CC(O)(C)C)c1nonc1N	GSK-690693	4.975	135.626
CCn1c(nc2c1c(OC[C@H]1CCCNC1)cnc2C#CC(O)(C)C)c1nonc1N	GSK-690693	4.975	118.105
CCn1c(nc2c1c(OC[C@H]1CCCNC1)cnc2C#CC(O)(C)C)c1nonc1N	GSK-690693	19.9	349.691	329.154
CCn1c(nc2c1c(OC[C@H]1CCCNC1)cnc2C#CC(O)(C)C)c1nonc1N	GSK-690693	19.9	238.979
CCn1c(nc2c1c(OC[C@H]1CCCNC1)cnc2C#CC(O)(C)C)c1nonc1N	GSK-690693	19.9	398.79
CCSCc1ccc2c(c1)c1c3C(=O)NCc3c3c4c1n2[C@H]1C[C@]([C@](O1)(n4c1c3cc(cc1)CSCC)C)(O)C(=O)OC	CEP-1347	0.002537	19.8763	9.93164
CCSCc1ccc2c(c1)c1c3C(=O)NCc3c3c4c1n2[C@H]1C[C@]([C@](O1)(n4c1c3cc(cc1)CSCC)C)(O)C(=O)OC	CEP-1347	0.002537	0.983799
CCSCc1ccc2c(c1)c1c3C(=O)NCc3c3c4c1n2[C@H]1C[C@]([C@](O1)(n4c1c3cc(cc1)CSCC)C)(O)C(=O)OC	CEP-1347	0.002537	8.93481
CCSCc1ccc2c(c1)c1c3C(=O)NCc3c3c4c1n2[C@H]1C[C@]([C@](O1)(n4c1c3cc(cc1)CSCC)C)(O)C(=O)OC	CEP-1347	0.008278	-3.99662	0.0627435
CCSCc1ccc2c(c1)c1c3C(=O)NCc3c3c4c1n2[C@H]1C[C@]([C@](O1)(n4c1c3cc(cc1)CSCC)C)(O)C(=O)OC	CEP-1347	0.008278	0.283539
CCSCc1ccc2c(c1)c1c3C(=O)NCc3c3c4c1n2[C@H]1C[C@]([C@](O1)(n4c1c3cc(cc1)CSCC)C)(O)C(=O)OC	CEP-1347	0.008278	3.90131
CCSCc1ccc2c(c1)c1c3C(=O)NCc3c3c4c1n2[C@H]1C[C@]([C@](O1)(n4c1c3cc(cc1)CSCC)C)(O)C(=O)OC	CEP-1347	0.02483	-2.50196	4.6958
CCSCc1ccc2c(c1)c1c3C(=O)NCc3c3c4c1n2[C@H]1C[C@]([C@](O1)(n4c1c3cc(cc1)CSCC)C)(O)C(=O)OC	CEP-1347	0.02483	8.69728
CCSCc1ccc2c(c1)c1c3C(=O)NCc3c3c4c1n2[C@H]1C[C@]([C@](O1)(n4c1c3cc(cc1)CSCC)C)(O)C(=O)OC	CEP-1347	0.02483	7.89208
CCSCc1ccc2c(c1)c1c3C(=O)NCc3c3c4c1n2[C@H]1C[C@]([C@](O1)(n4c1c3cc(cc1)CSCC)C)(O)C(=O)OC	CEP-1347	0.08278	1.22224	-2.18036
CCSCc1ccc2c(c1)c1c3C(=O)NCc3c3c4c1n2[C@H]1C[C@]([C@](O1)(n4c1c3cc(cc1)CSCC)C)(O)C(=O)OC	CEP-1347	0.08278	-7.65173
CCSCc1ccc2c(c1)c1c3C(=O)NCc3c3c4c1n2[C@H]1C[C@]([C@](O1)(n4c1c3cc(cc1)CSCC)C)(O)C(=O)OC	CEP-1347	0.08278	-0.111586
CCSCc1ccc2c(c1)c1c3C(=O)NCc3c3c4c1n2[C@H]1C[C@]([C@](O1)(n4c1c3cc(cc1)CSCC)C)(O)C(=O)OC	CEP-1347	0.2199	20.7233	9.56974
CCSCc1ccc2c(c1)c1c3C(=O)NCc3c3c4c1n2[C@H]1C[C@]([C@](O1)(n4c1c3cc(cc1)CSCC)C)(O)C(=O)OC	CEP-1347	0.2199	-3.74919
CCSCc1ccc2c(c1)c1c3C(=O)NCc3c3c4c1n2[C@H]1C[C@]([C@](O1)(n4c1c3cc(cc1)CSCC)C)(O)C(=O)OC	CEP-1347	0.2199	11.7351
CCSCc1ccc2c(c1)c1c3C(=O)NCc3c3c4c1n2[C@H]1C[C@]([C@](O1)(n4c1c3cc(cc1)CSCC)C)(O)C(=O)OC	CEP-1347	0.6598	5.45607	4.58769
CCSCc1ccc2c(c1)c1c3C(=O)NCc3c3c4c1n2[C@H]1C[C@]([C@](O1)(n4c1c3cc(cc1)CSCC)C)(O)C(=O)OC	CEP-1347	0.6598	5.48548
CCSCc1ccc2c(c1)c1c3C(=O)NCc3c3c4c1n2[C@H]1C[C@]([C@](O1)(n4c1c3cc(cc1)CSCC)C)(O)C(=O)OC	CEP-1347	0.6598	2.82151
CCSCc1ccc2c(c1)c1c3C(=O)NCc3c3c4c1n2[C@H]1C[C@]([C@](O1)(n4c1c3cc(cc1)CSCC)C)(O)C(=O)OC	CEP-1347	2.199	42.0815	28.2324
CCSCc1ccc2c(c1)c1c3C(=O)NCc3c3c4c1n2[C@H]1C[C@]([C@](O1)(n4c1c3cc(cc1)CSCC)C)(O)C(=O)OC	CEP-1347	2.199	23.3838
CCSCc1ccc2c(c1)c1c3C(=O)NCc3c3c4c1n2[C@H]1C[C@]([C@](O1)(n4c1c3cc(cc1)CSCC)C)(O)C(=O)OC	CEP-1347	2.199	19.2318
CCSCc1ccc2c(c1)c1c3C(=O)NCc3c3c4c1n2[C@H]1C[C@]([C@](O1)(n4c1c3cc(cc1)CSCC)C)(O)C(=O)OC	CEP-1347	4.975	66.1865	62.6393
CCSCc1ccc2c(c1)c1c3C(=O)NCc3c3c4c1n2[C@H]1C[C@]([C@](O1)(n4c1c3cc(cc1)CSCC)C)(O)C(=O)OC	CEP-1347	4.975	38.8094
CCSCc1ccc2c(c1)c1c3C(=O)NCc3c3c4c1n2[C@H]1C[C@]([C@](O1)(n4c1c3cc(cc1)CSCC)C)(O)C(=O)OC	CEP-1347	4.975	82.9221
CCSCc1ccc2c(c1)c1c3C(=O)NCc3c3c4c1n2[C@H]1C[C@]([C@](O1)(n4c1c3cc(cc1)CSCC)C)(O)C(=O)OC	CEP-1347	19.9	45.7354	66.3162
CCSCc1ccc2c(c1)c1c3C(=O)NCc3c3c4c1n2[C@H]1C[C@]([C@](O1)(n4c1c3cc(cc1)CSCC)C)(O)C(=O)OC	CEP-1347	19.9	64.6433
CCSCc1ccc2c(c1)c1c3C(=O)NCc3c3c4c1n2[C@H]1C[C@]([C@](O1)(n4c1c3cc(cc1)CSCC)C)(O)C(=O)OC	CEP-1347	19.9	88.5699
NC[C@@](c1ccc(cc1)Cl)(c1ccc(cc1)c1c[nH]nc1)O	AT-13148	0.002537	-1.49046	2.01279
NC[C@@](c1ccc(cc1)Cl)(c1ccc(cc1)c1c[nH]nc1)O	AT-13148	0.002537	3.65229
NC[C@@](c1ccc(cc1)Cl)(c1ccc(cc1)c1c[nH]nc1)O	AT-13148	0.002537	3.87653
NC[C@@](c1ccc(cc1)Cl)(c1ccc(cc1)c1c[nH]nc1)O	AT-13148	0.008278	-3.52219	-4.07076
NC[C@@](c1ccc(cc1)Cl)(c1ccc(cc1)c1c[nH]nc1)O	AT-13148	0.008278	-3.1969
NC[C@@](c1ccc(cc1)Cl)(c1ccc(cc1)c1c[nH]nc1)O	AT-13148	0.008278	-5.4932
NC[C@@](c1ccc(cc1)Cl)(c1ccc(cc1)c1c[nH]nc1)O	AT-13148	0.02483	1.4695	4.39359
NC[C@@](c1ccc(cc1)Cl)(c1ccc(cc1)c1c[nH]nc1)O	AT-13148	0.02483	-0.346086
NC[C@@](c1ccc(cc1)Cl)(c1ccc(cc1)c1c[nH]nc1)O	AT-13148	0.02483	12.0574
NC[C@@](c1ccc(cc1)Cl)(c1ccc(cc1)c1c[nH]nc1)O	AT-13148	0.08278	24.25	9.27964
NC[C@@](c1ccc(cc1)Cl)(c1ccc(cc1)c1c[nH]nc1)O	AT-13148	0.08278	0.233492
NC[C@@](c1ccc(cc1)Cl)(c1ccc(cc1)c1c[nH]nc1)O	AT-13148	0.08278	3.3554
NC[C@@](c1ccc(cc1)Cl)(c1ccc(cc1)c1c[nH]nc1)O	AT-13148	0.2199	7.37463	3.68358
NC[C@@](c1ccc(cc1)Cl)(c1ccc(cc1)c1c[nH]nc1)O	AT-13148	0.2199	-1.05757
NC[C@@](c1ccc(cc1)Cl)(c1ccc(cc1)c1c[nH]nc1)O	AT-13148	0.2199	4.73369
NC[C@@](c1ccc(cc1)Cl)(c1ccc(cc1)c1c[nH]nc1)O	AT-13148	0.6598	5.15243	5.03299
NC[C@@](c1ccc(cc1)Cl)(c1ccc(cc1)c1c[nH]nc1)O	AT-13148	0.6598	14.732
NC[C@@](c1ccc(cc1)Cl)(c1ccc(cc1)c1c[nH]nc1)O	AT-13148	0.6598	-4.78549
NC[C@@](c1ccc(cc1)Cl)(c1ccc(cc1)c1c[nH]nc1)O	AT-13148	2.199	21.134	16.6466
NC[C@@](c1ccc(cc1)Cl)(c1ccc(cc1)c1c[nH]nc1)O	AT-13148	2.199	8.86668
NC[C@@](c1ccc(cc1)Cl)(c1ccc(cc1)c1c[nH]nc1)O	AT-13148	2.199	19.939
NC[C@@](c1ccc(cc1)Cl)(c1ccc(cc1)c1c[nH]nc1)O	AT-13148	4.975	32.0197	20.1435
NC[C@@](c1ccc(cc1)Cl)(c1ccc(cc1)c1c[nH]nc1)O	AT-13148	4.975	16.1747
NC[C@@](c1ccc(cc1)Cl)(c1ccc(cc1)c1c[nH]nc1)O	AT-13148	4.975	12.236
NC[C@@](c1ccc(cc1)Cl)(c1ccc(cc1)c1c[nH]nc1)O	AT-13148	19.9	55.4982	77.5898
NC[C@@](c1ccc(cc1)Cl)(c1ccc(cc1)c1c[nH]nc1)O	AT-13148	19.9	58.5902
NC[C@@](c1ccc(cc1)Cl)(c1ccc(cc1)c1c[nH]nc1)O	AT-13148	19.9	118.681
