# Supplementary material for: Pharmacological inhibition of CLK2 activates YAP by promoting alternative splicing of AMOTL2
Source: eLife. 2023 Dec 21;12:RP88508. doi: 10.7554/eLife.88508 (PMC10735217; doi:10.7554/eLife.88508)
Supplement: Figure 2—source data 1. [file elife-88508-fig2-data1.xlsx]

## Sheet: Figure 2A
compound concentration	Relative luminance values normalized to DMSO
[SM04690] (nM)	replicate 1	replicate 2	replicate 3
78.13	2.22	3.05	2.63
39.06	4.34	3.95	2.75
19.53	2.98	3.52	2.94
9.77	2.91	3.45	3.31
4.88	2.38	3.77	3.28
2.44	1.66	2.72	2.82
1.22	1.4	1.77	3.11
0.61	1.06	1.45	2.09
0.31	1.05	1.2	1.34
0.15	1.11	1.02	1.06
0.08	1.06	1	1.02
0.04	0.91	1.09	1

## Sheet: Figure 2B
compound concentration	relative transcript values calculated using the ΔΔCt method
[SM04690]	ANKRD1			CTGF
	replicate 1	replicate 2	replicate 3	replicate 1	replicate 2	replicate 3
DMSO	0.876681	1.04924	1.08714	0.947649	0.962193	1.09671
1 nM	1.36467	1.5286	1.17443	0.9988	1.22433	1.21099
10 nM	1.18289	1.16597	0.91287	1.26234	0.8852	1.22264
50 nM	3.46174	2.41491	1.81935	2.29723	1.93082	1.98325
100 nM	9.29796	8.34964	6.02628	5.11014	4.60031	4.19427

## Sheet: Figure 2D
shRNA and [SM04690]	relative transcript values calculated using the ΔΔCt method
	ANKRD1			CTGF
	replicate 1	replicate 2	replicate 3	replicate 1	replicate 2	replicate 3
Scramble, 0 nM	0.918473	1.08253	1.00576	0.985521	1.01357	1.0011
Scramble, 1000 nM	1.62504	1.67923	1.60358	1.23724	1.23195	1.2387
shYAP1, 1000 nM	0.586798	0.533661	0.553775	0.342844	0.364082	0.343724
shYAP2, 1000 nM	0.462411	0.436043	0.473669	0.403563	0.423313	0.454692
shYAP1+2, 1000 nM	0.290402	0.303255	0.272833	0.299585	0.297691	0.282483
