# Supplementary figures and images for: Pharmacological inhibition of CLK2 activates YAP by promoting alternative splicing of AMOTL2
Source: eLife journal article supplement (doi:10.7554/elife.88508), 2023-07-27

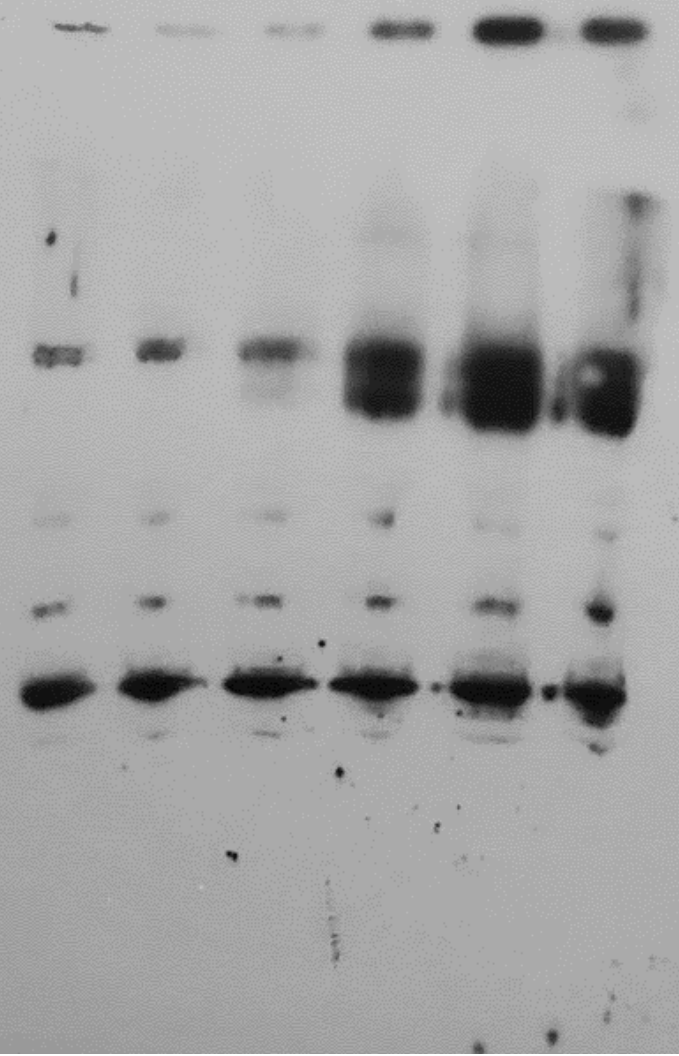

Supplement: fig3-data2 [file elife-88508-fig3-data2-v1.zip]

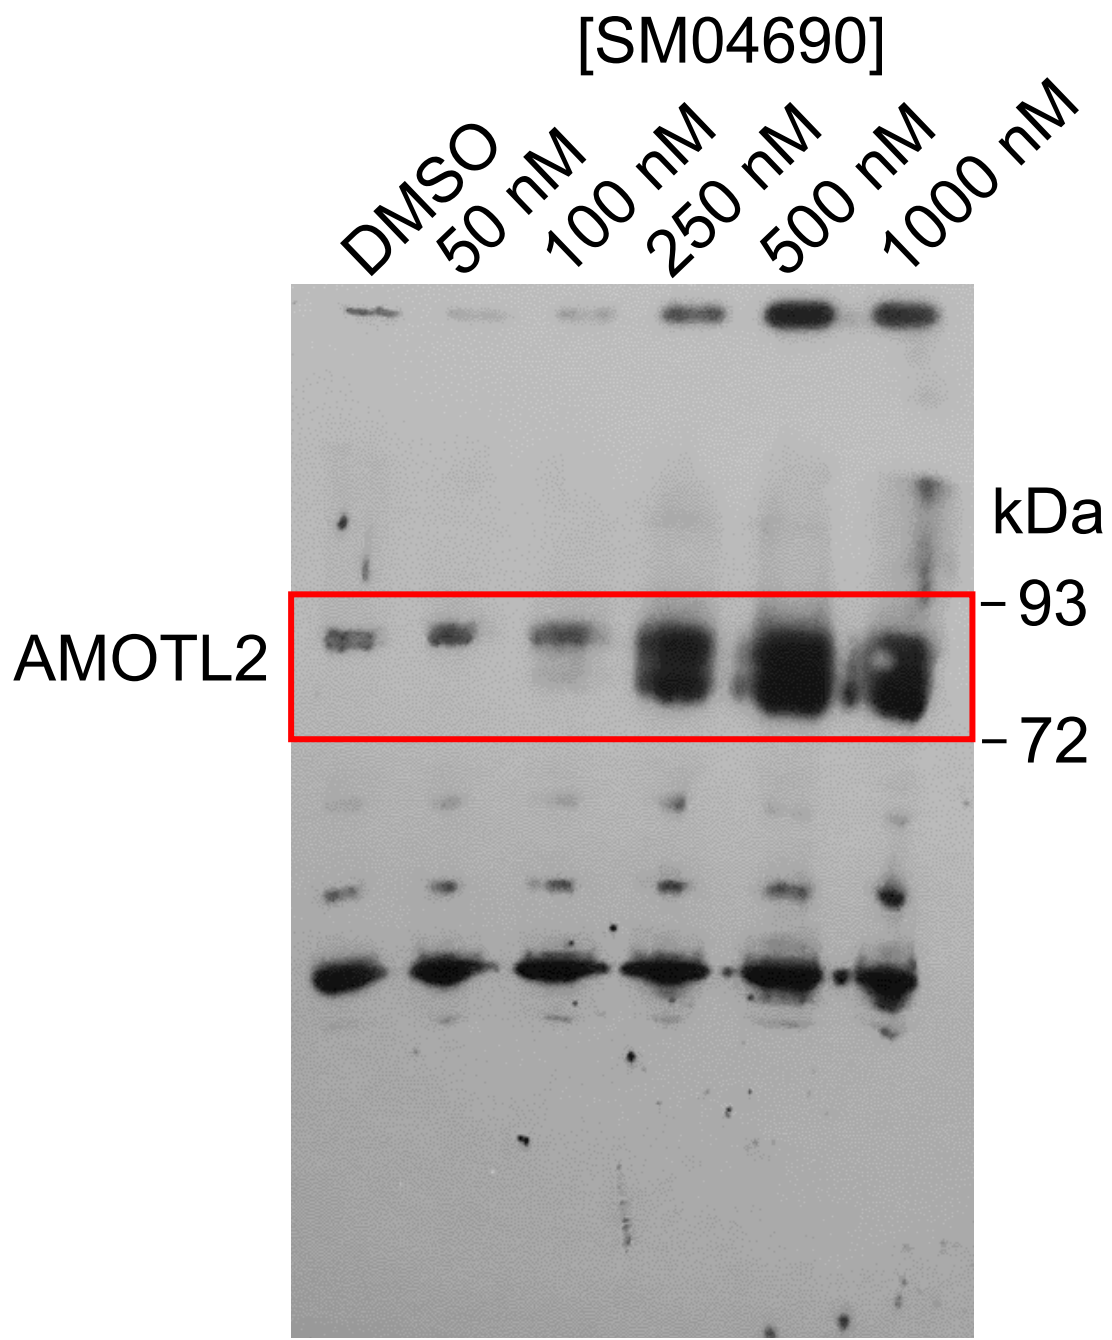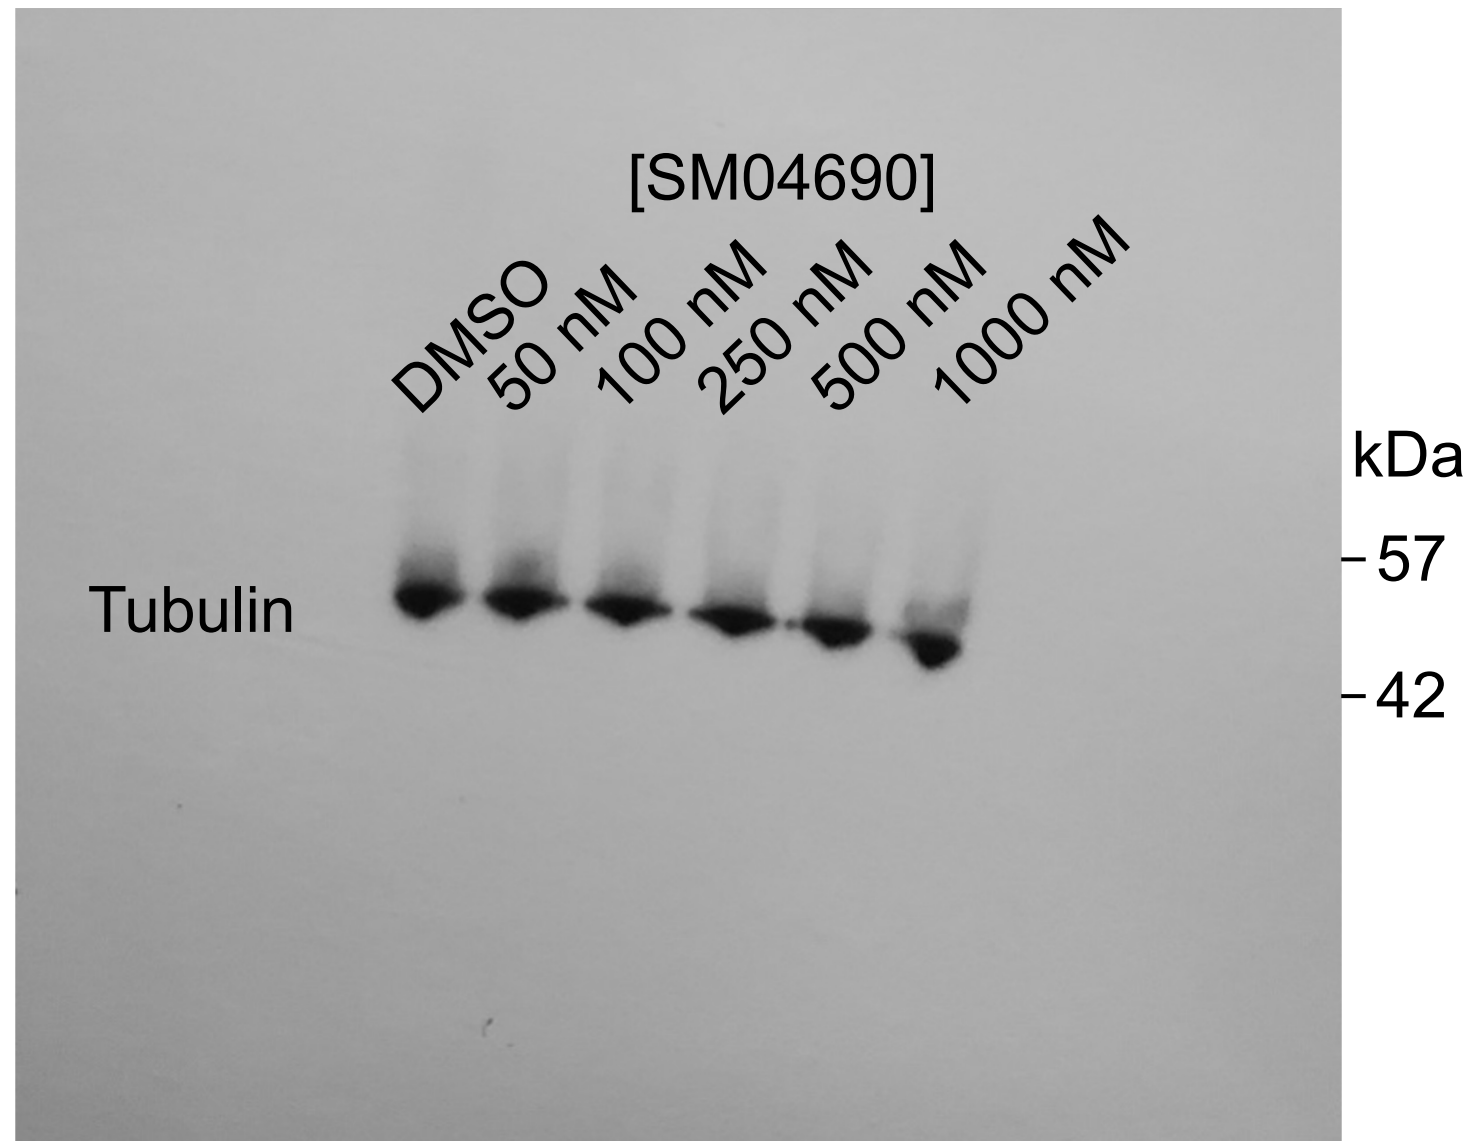

Supplement: fig3-data2 [file elife-88508-fig3-data2-v1.zip]
